# Supplementary material
Source: PubMed Central journal article supplement (PMC8316258)

Supplemental Figure 3. Heatmap depicting semi-Bayes shrunk adjusted rate ratios for unintentional traumatic injury, by time since point exposure, by antidepressant object drug cohort (limited to the three antidepressants with most users under study).

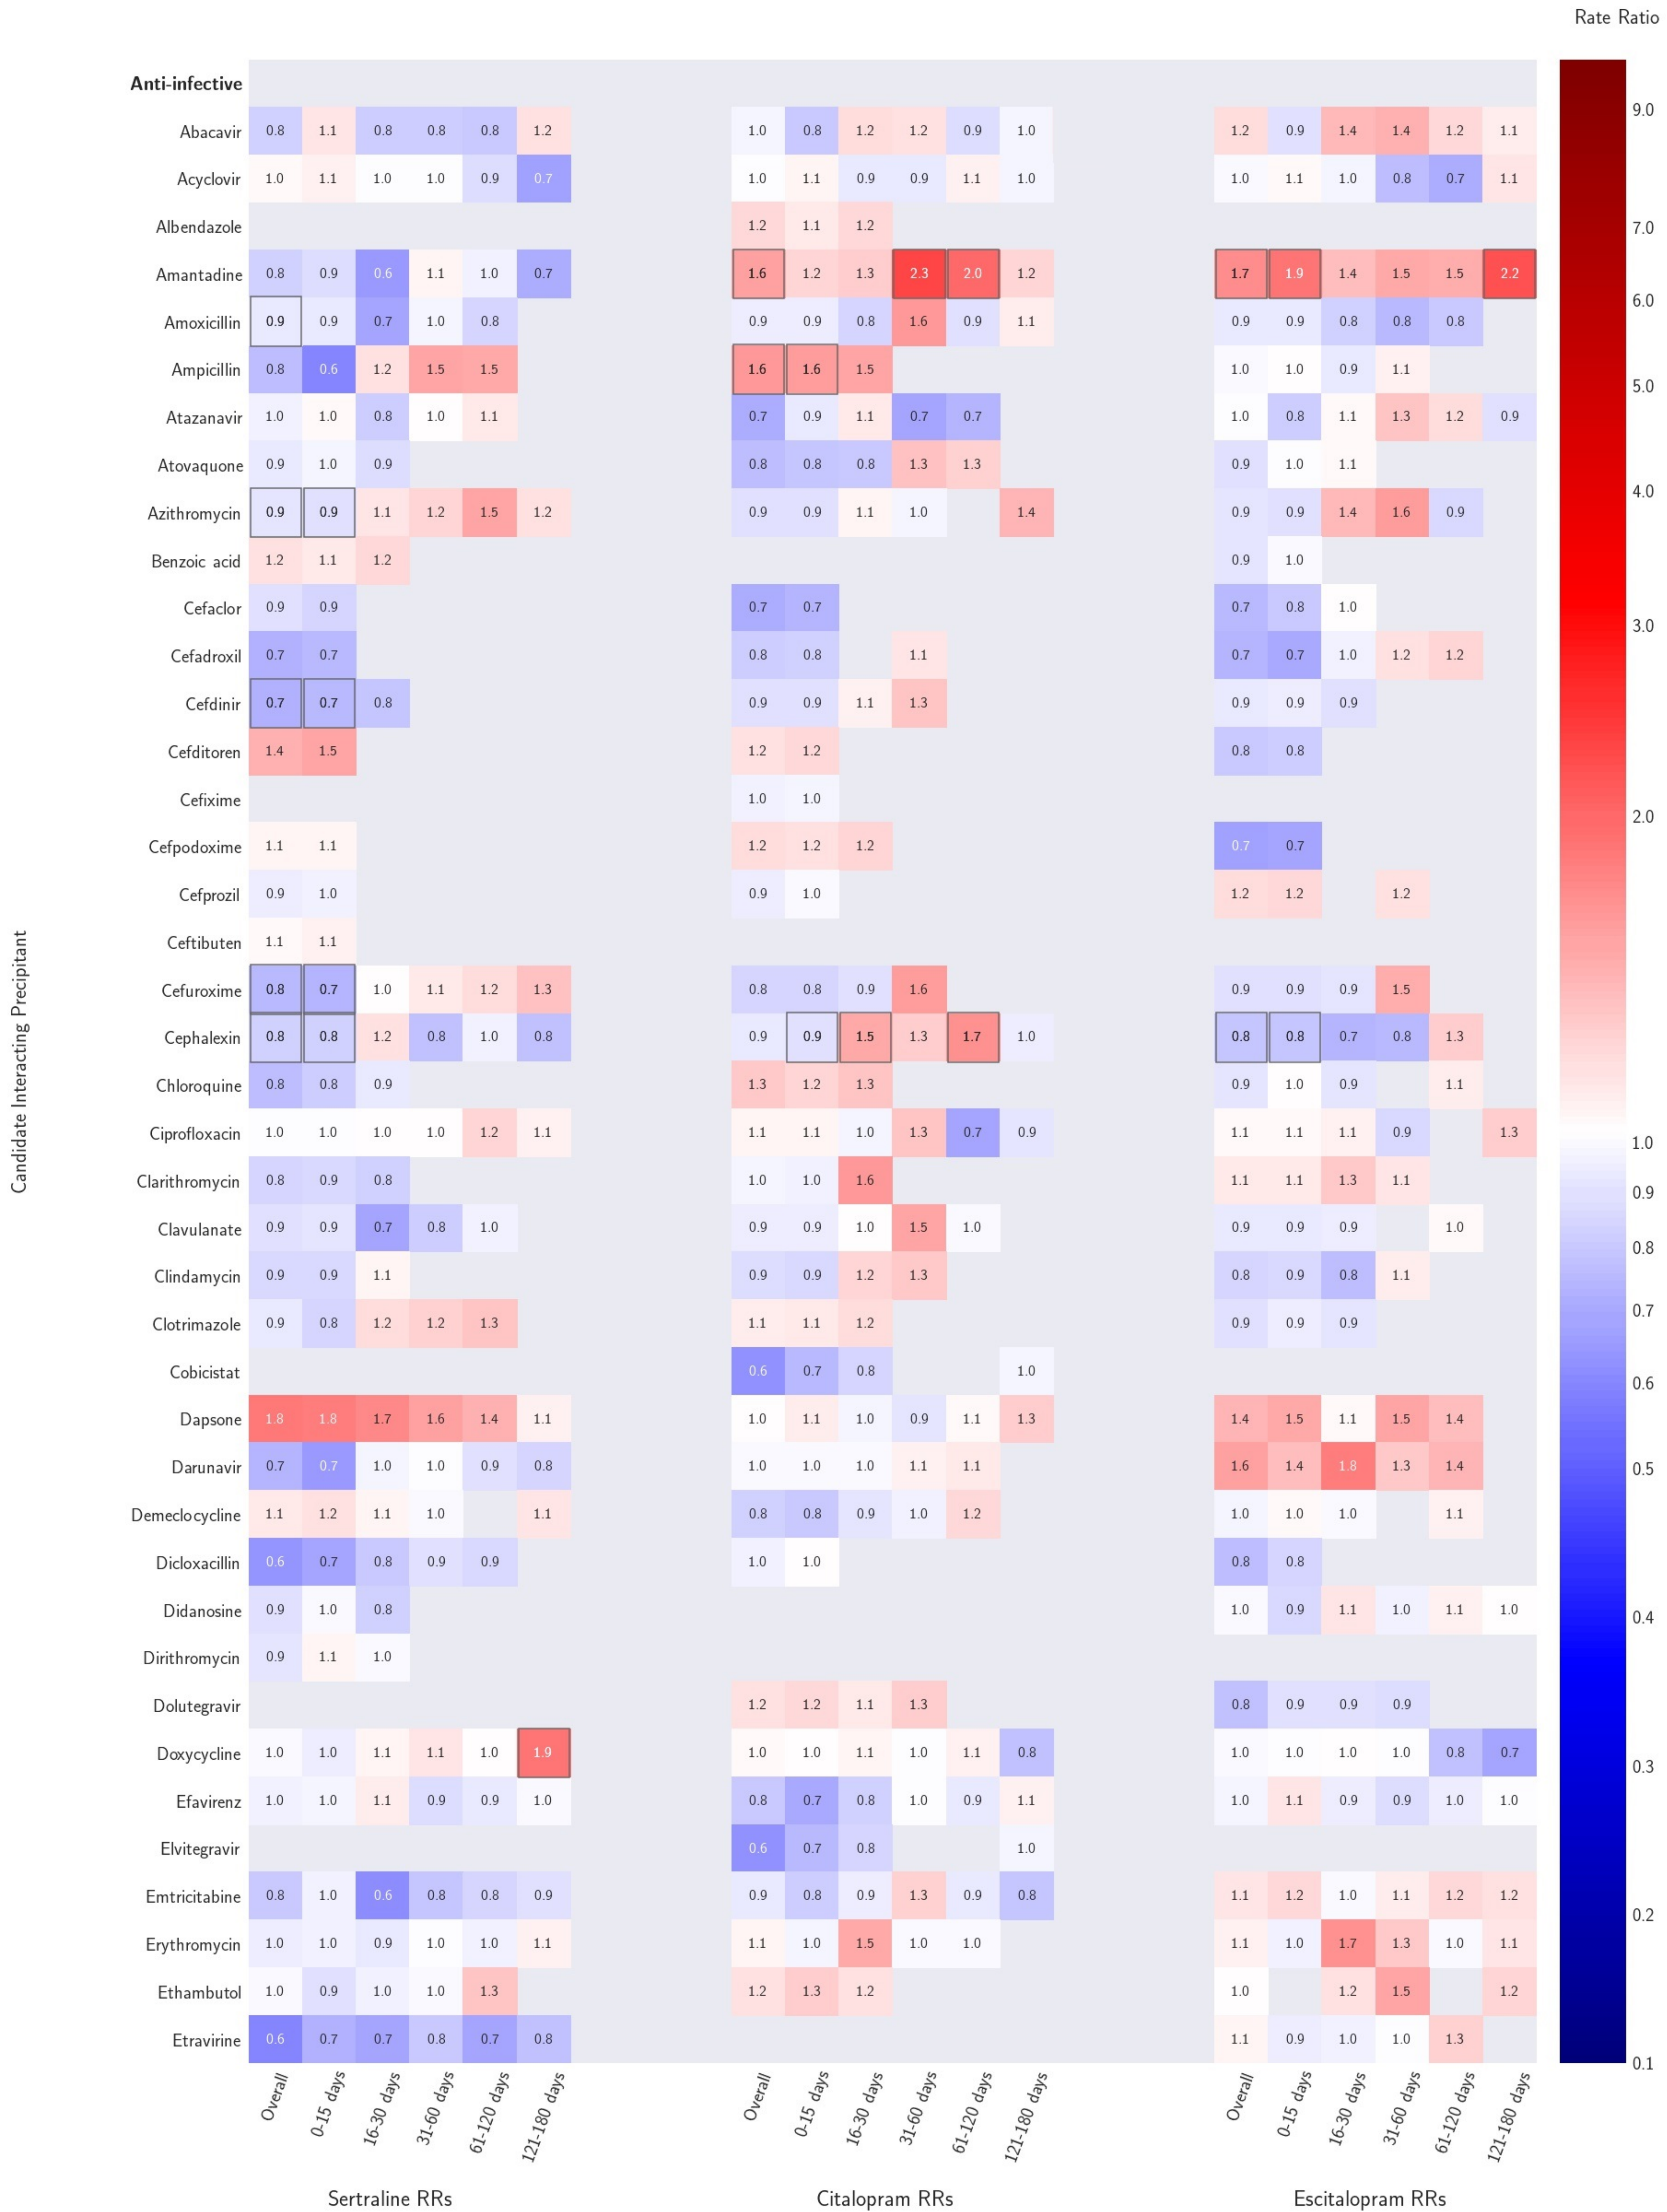



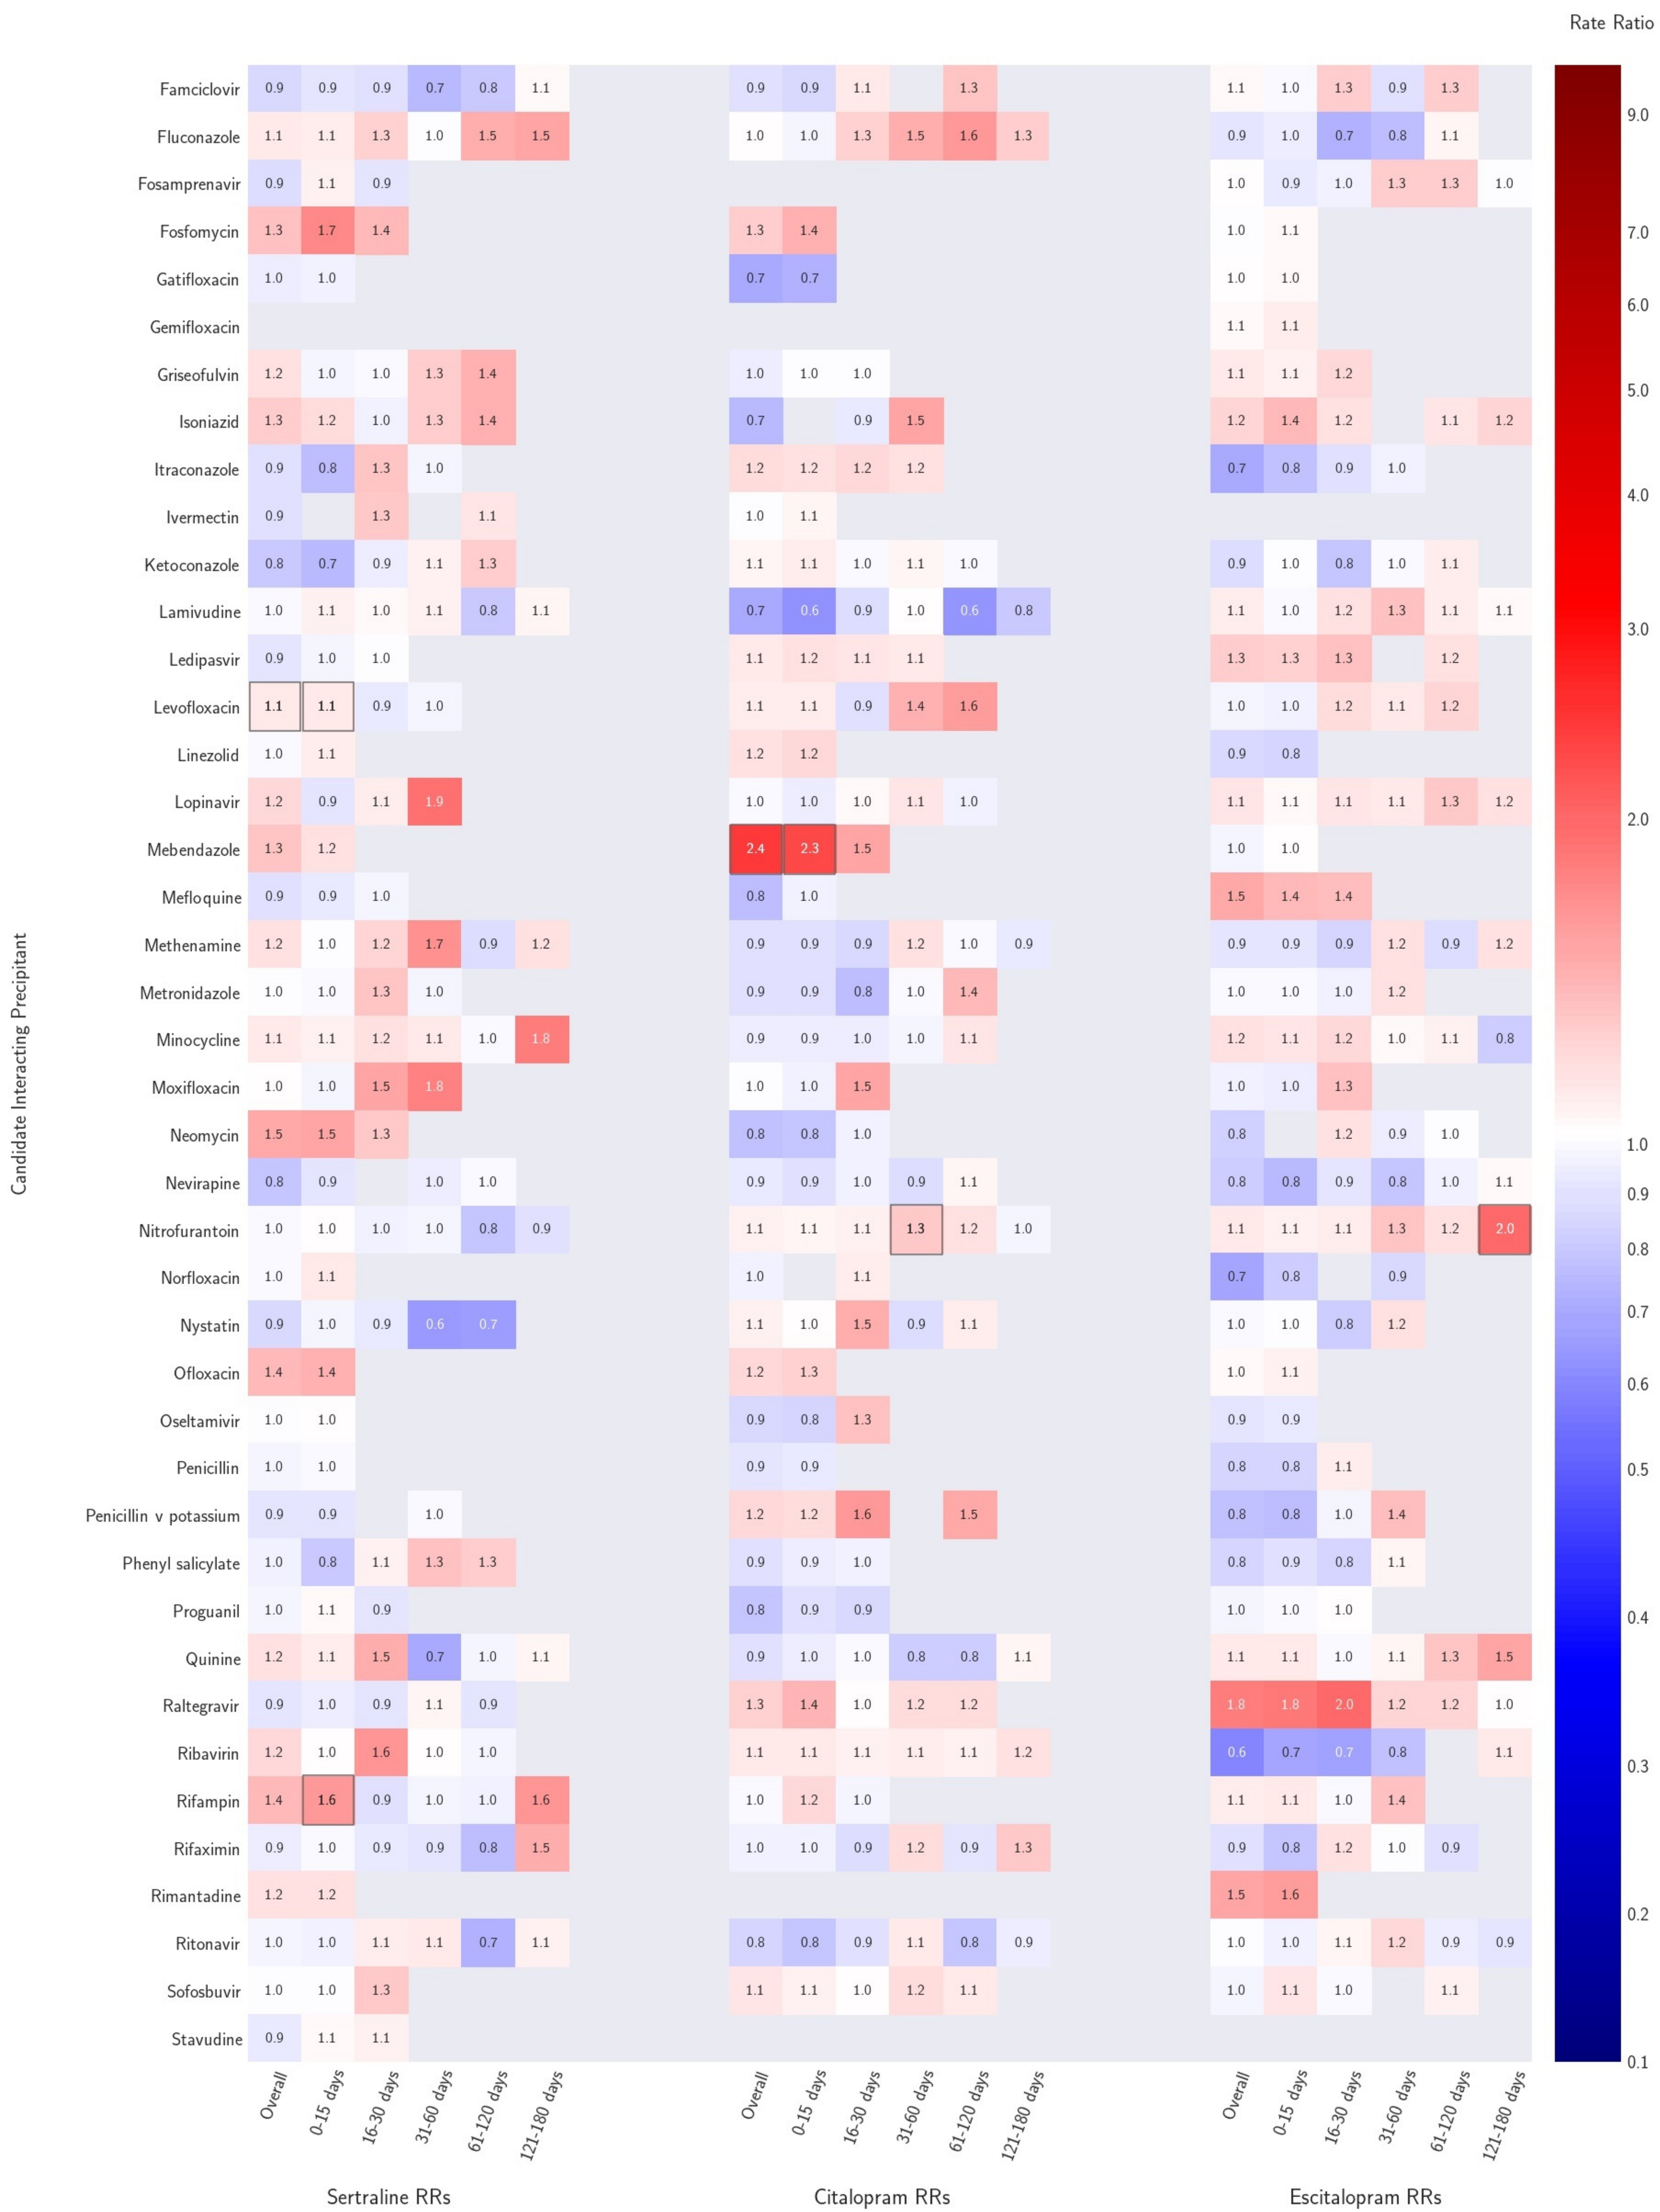



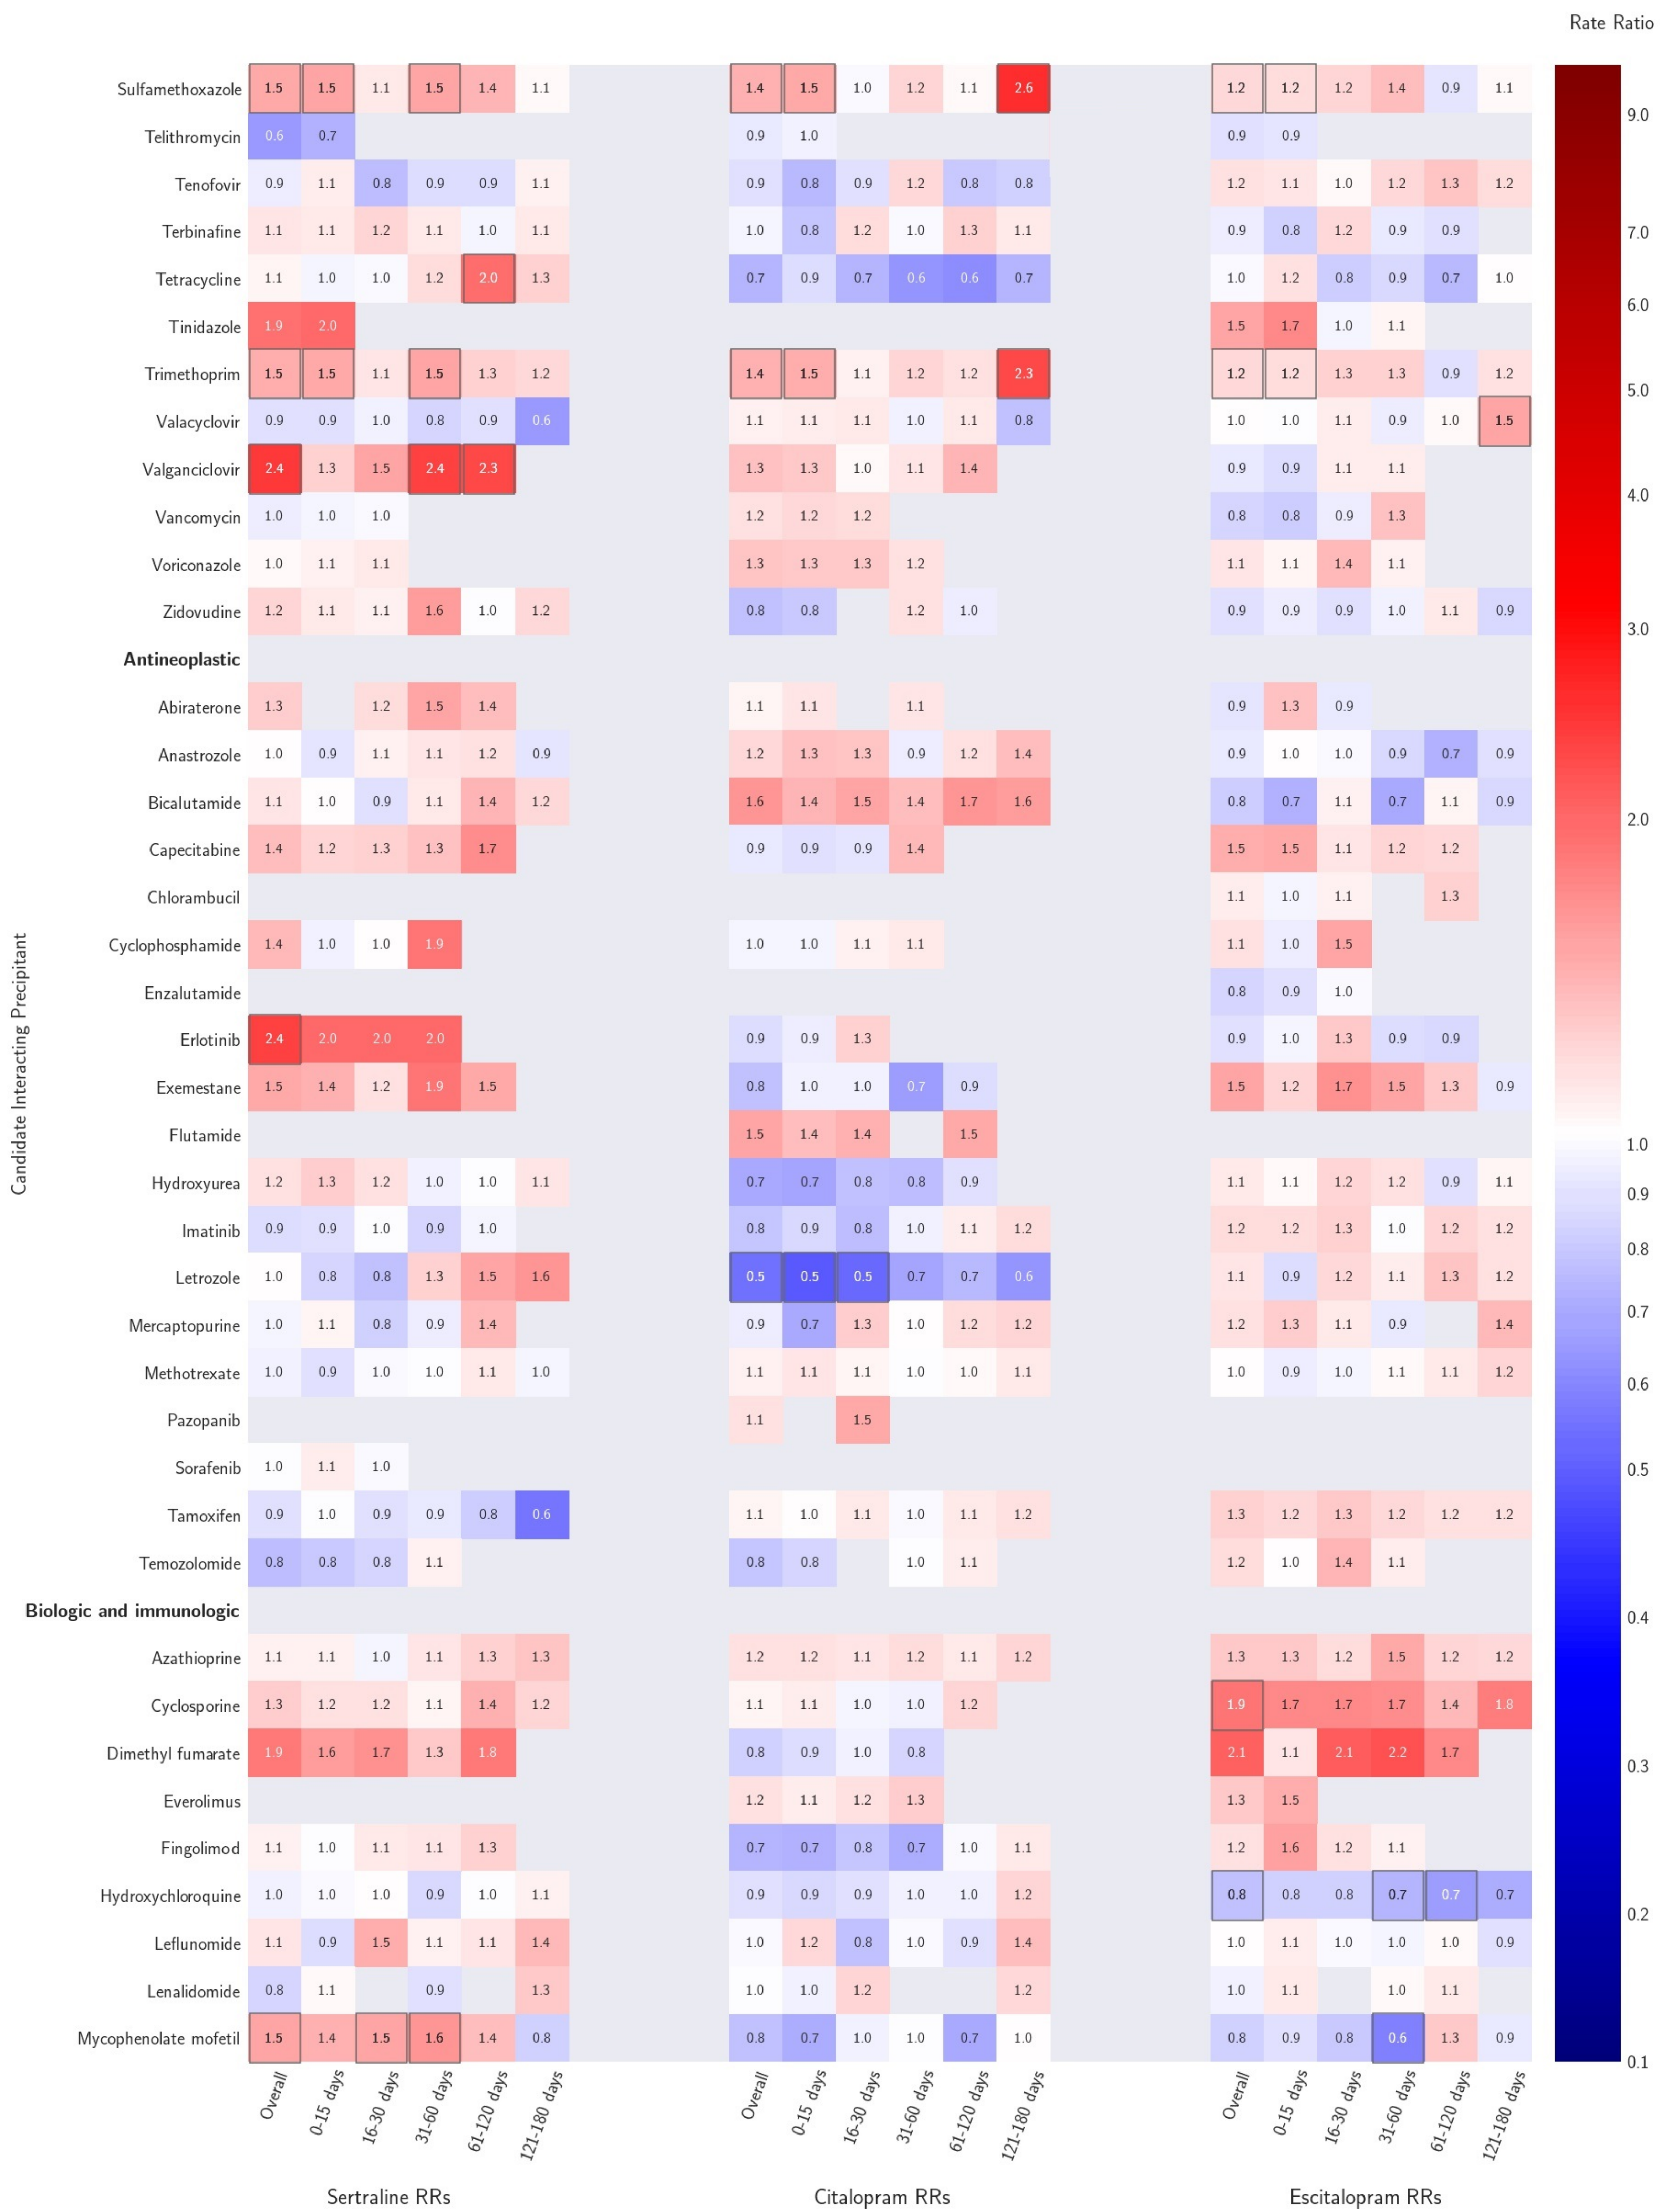



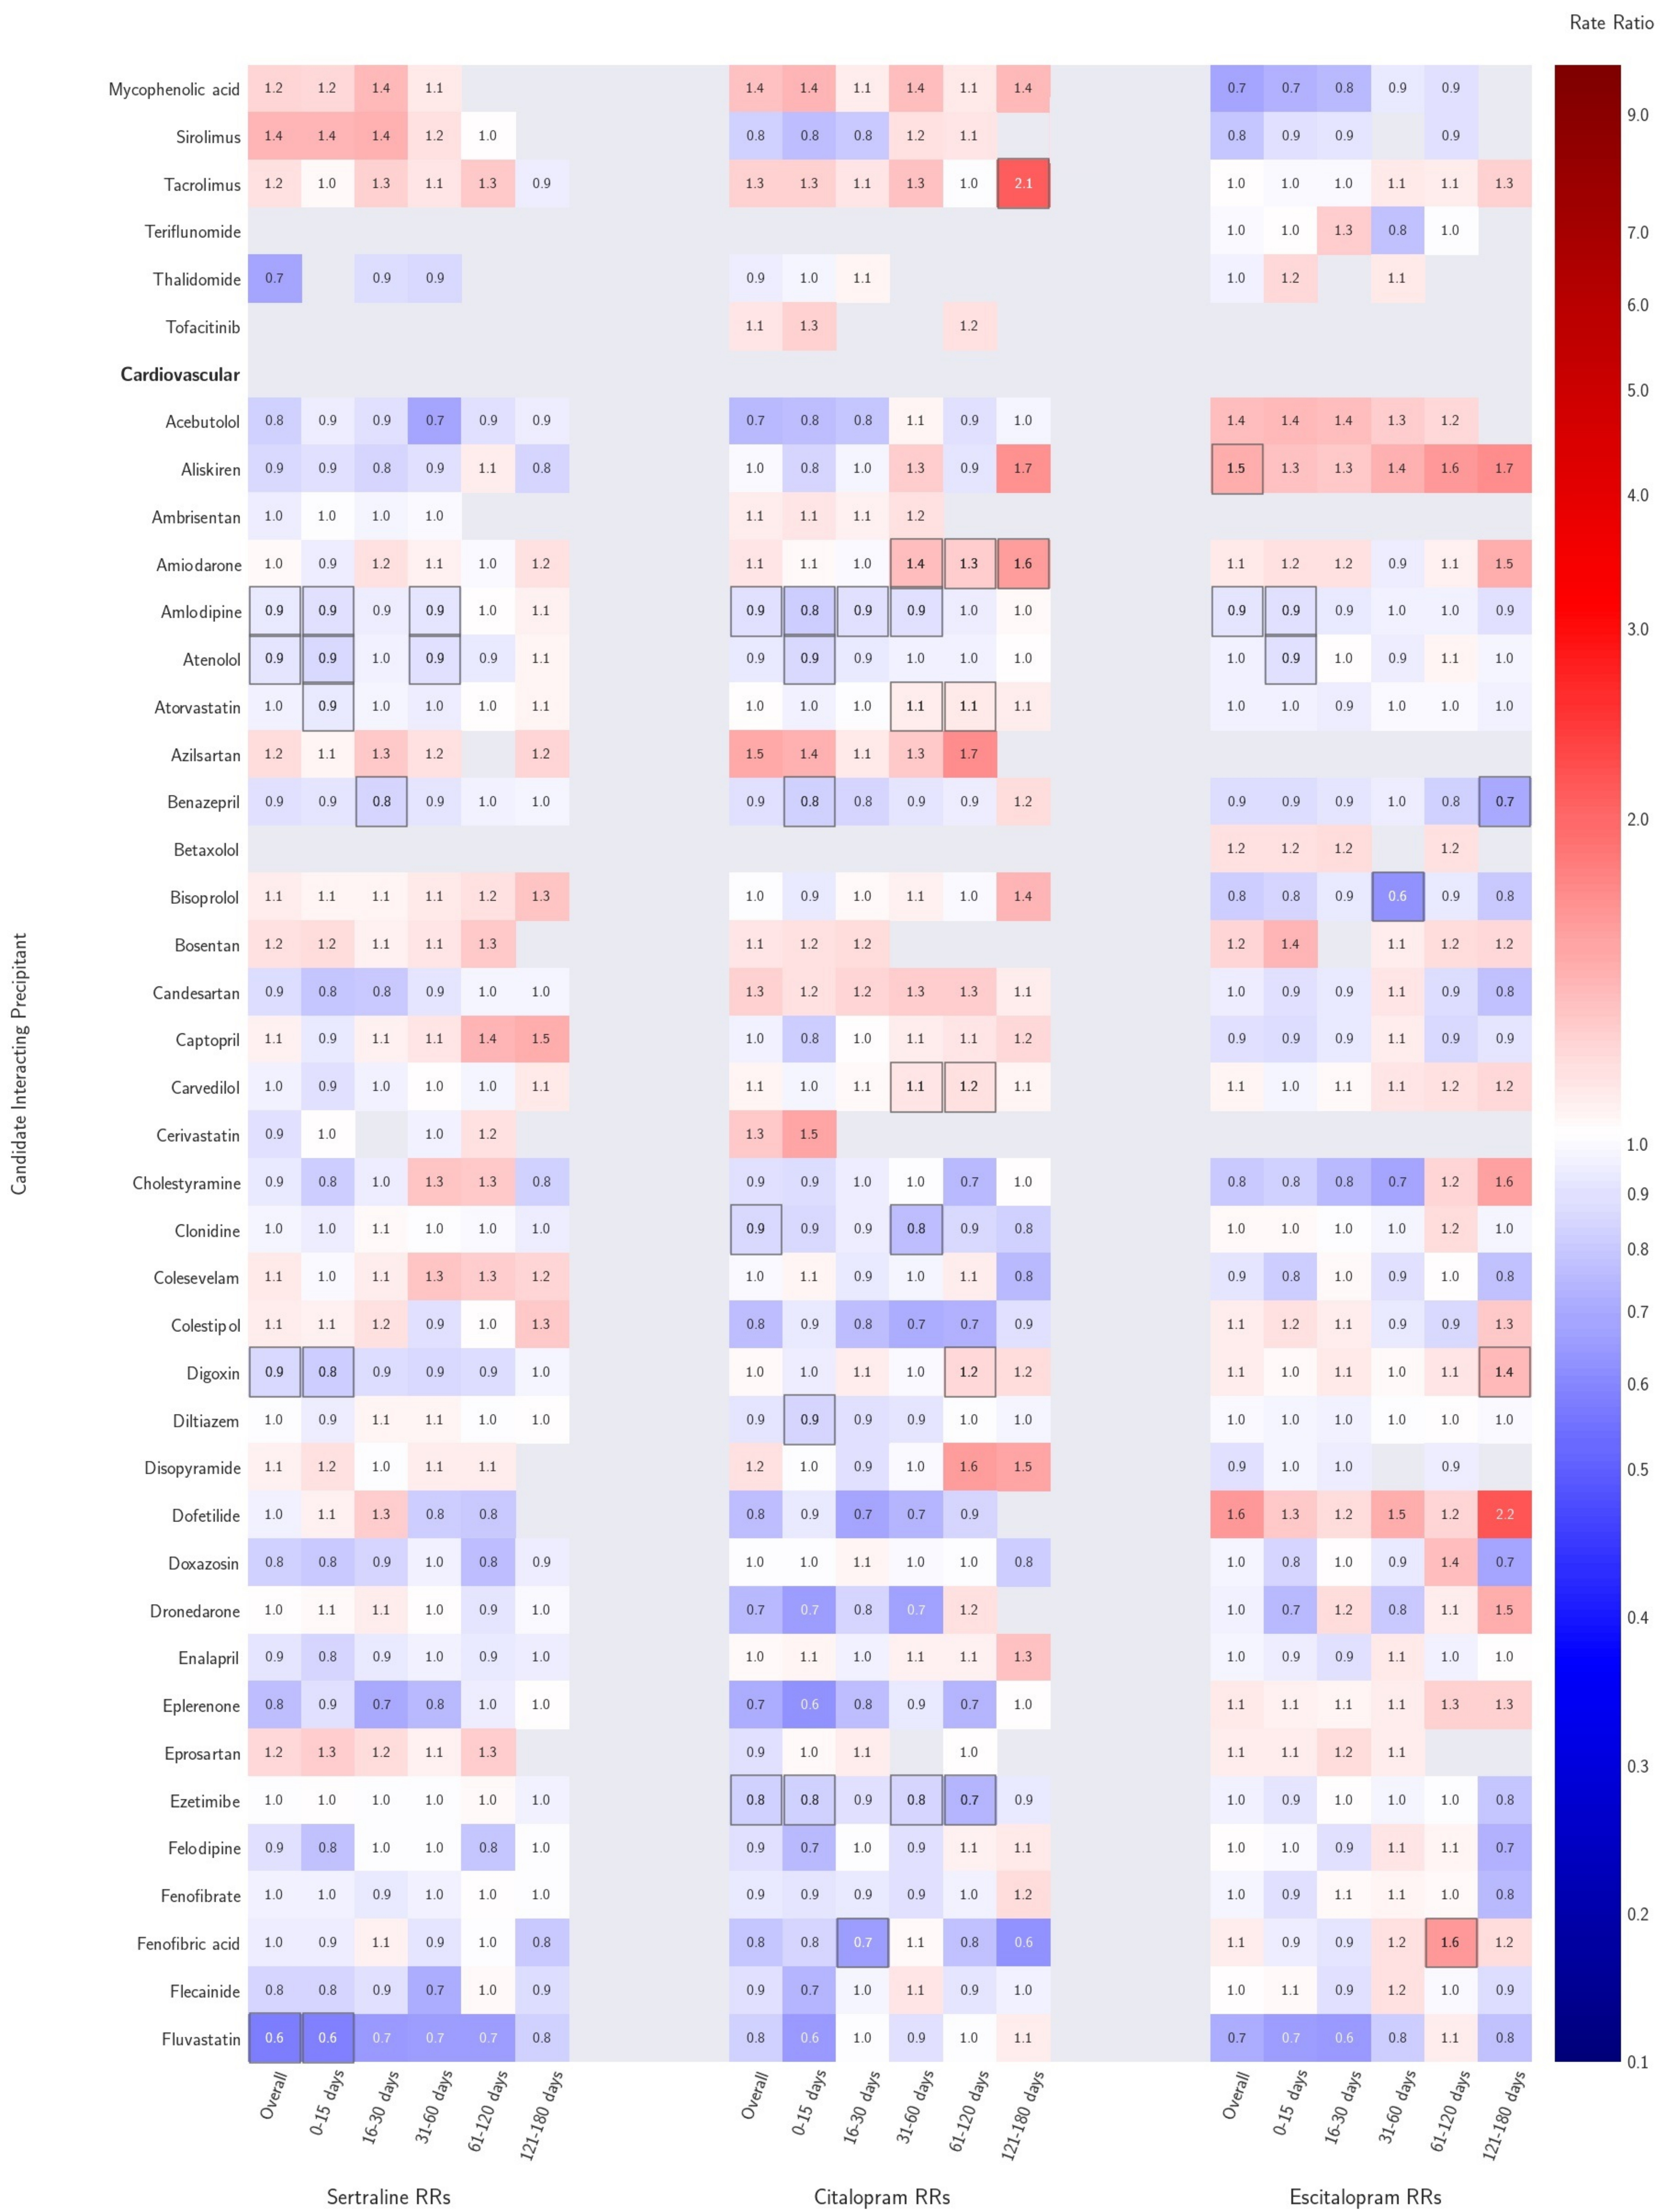



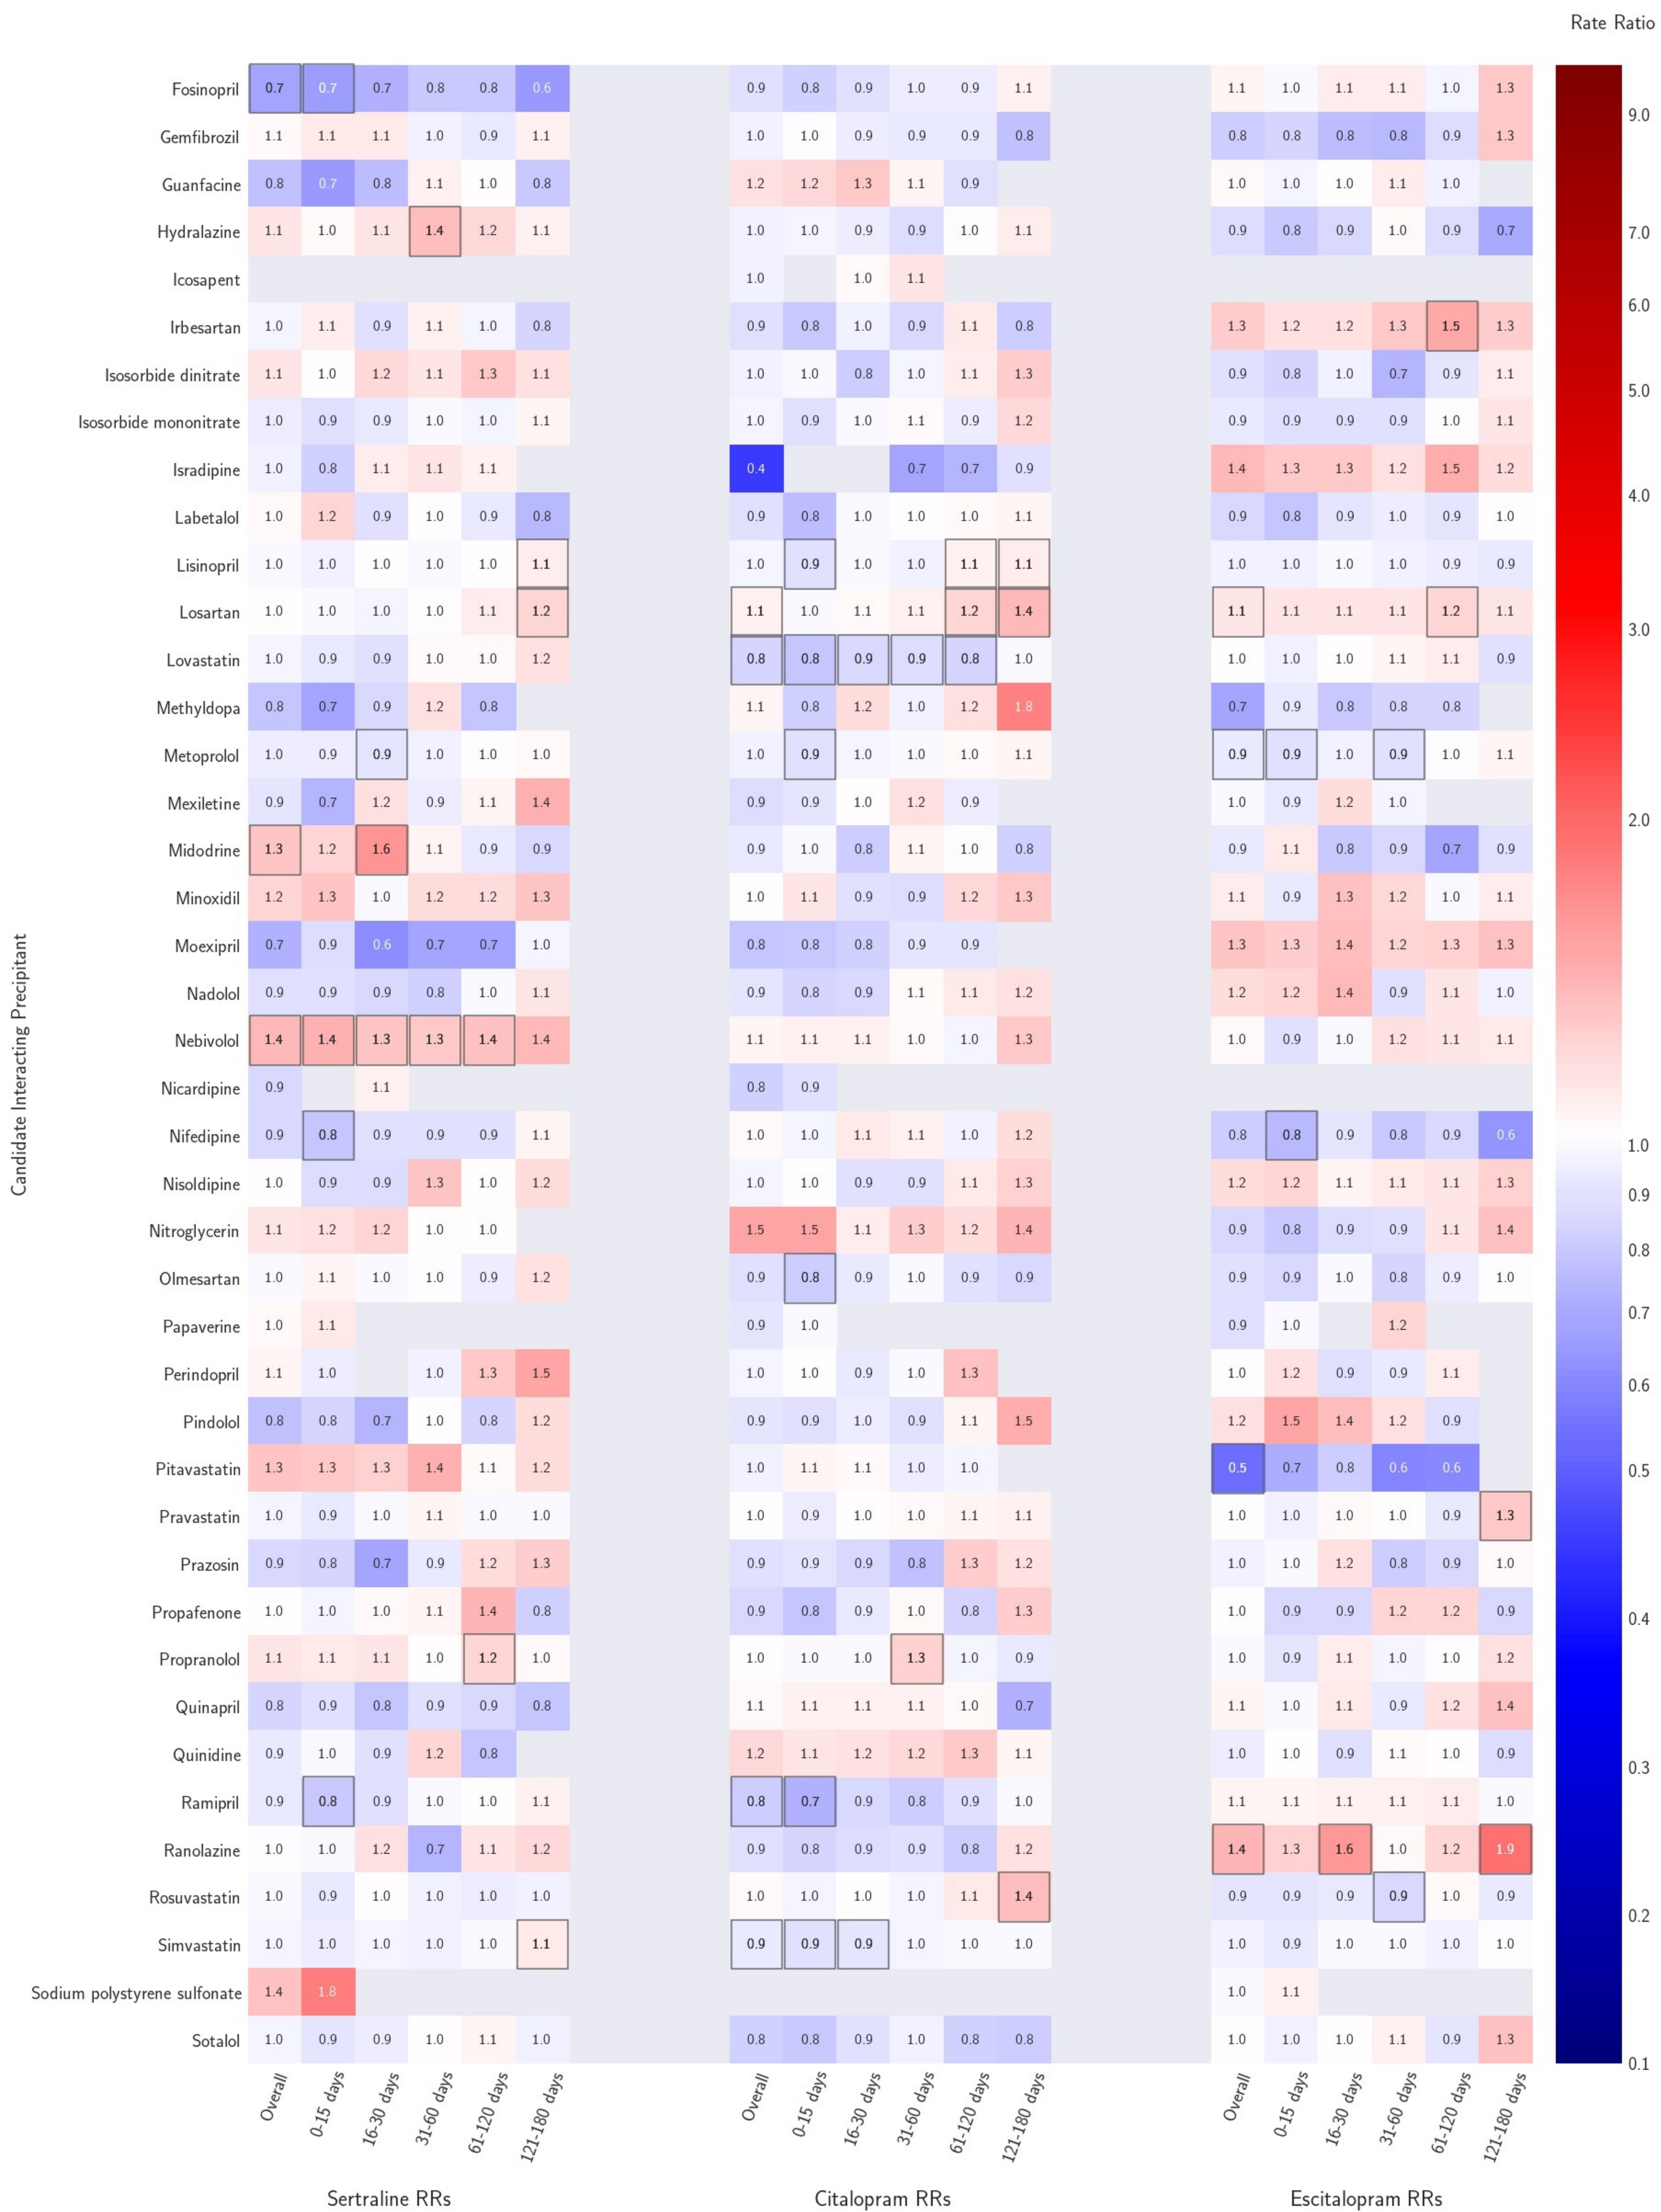



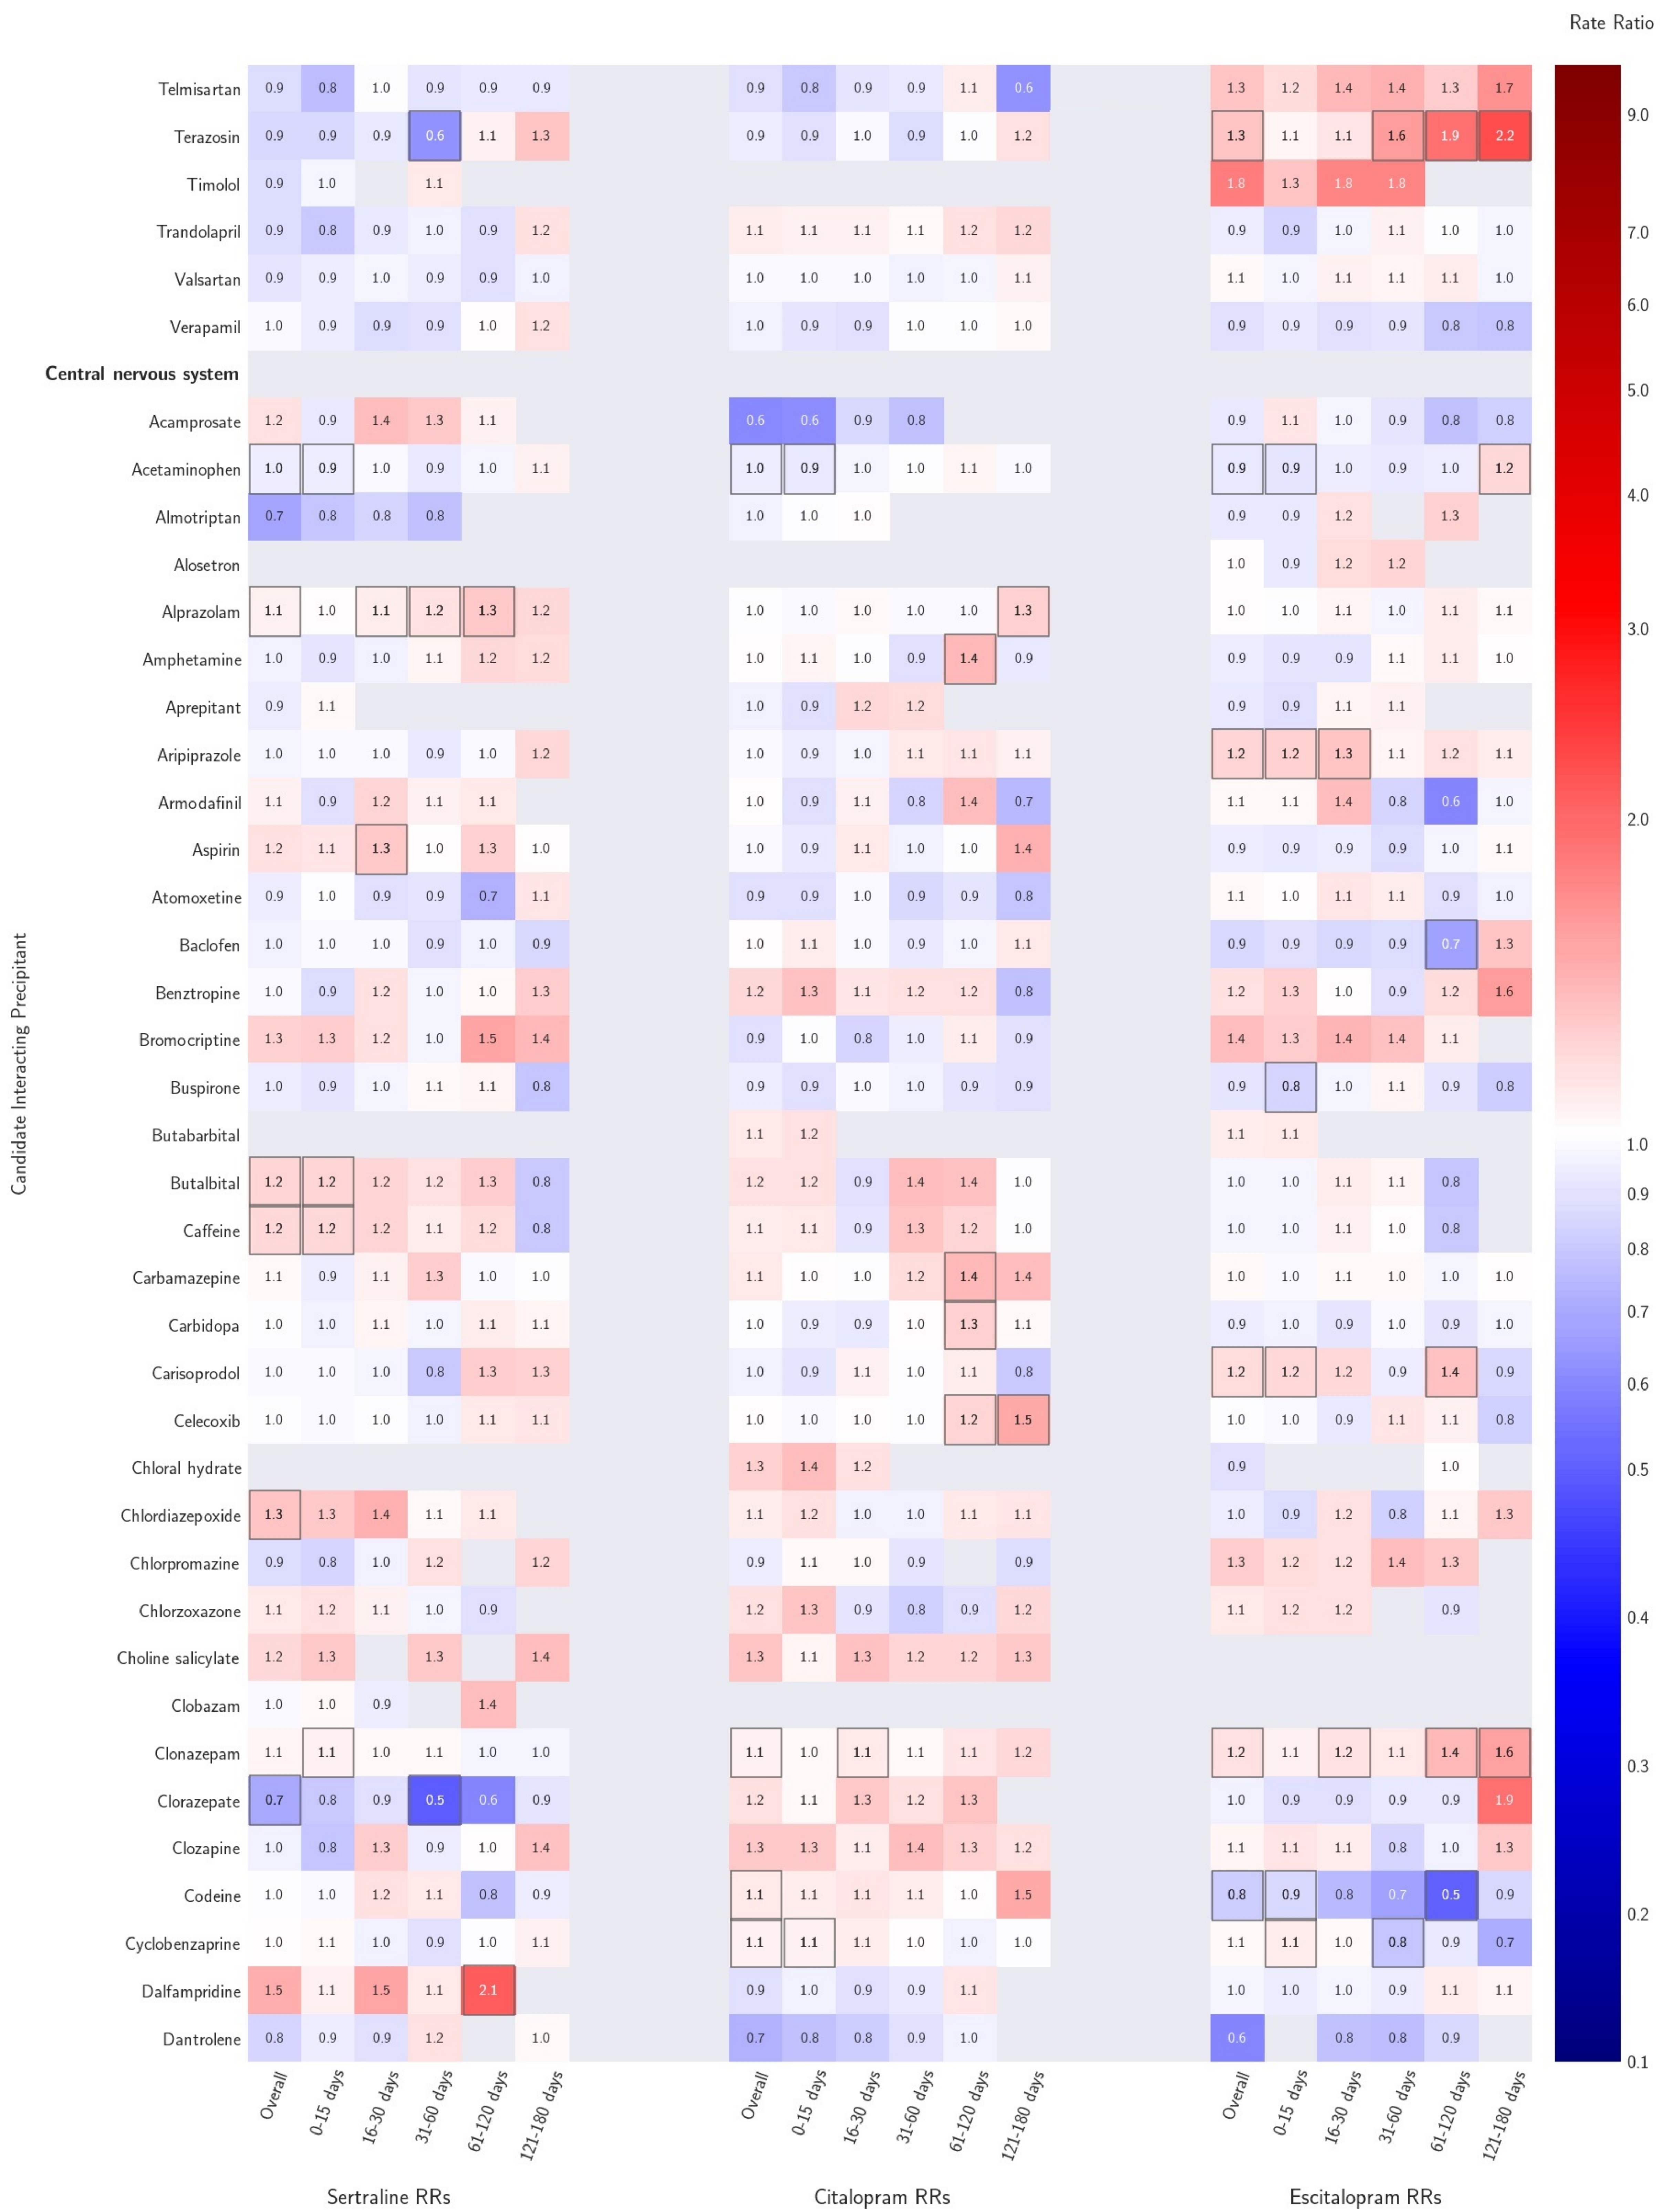



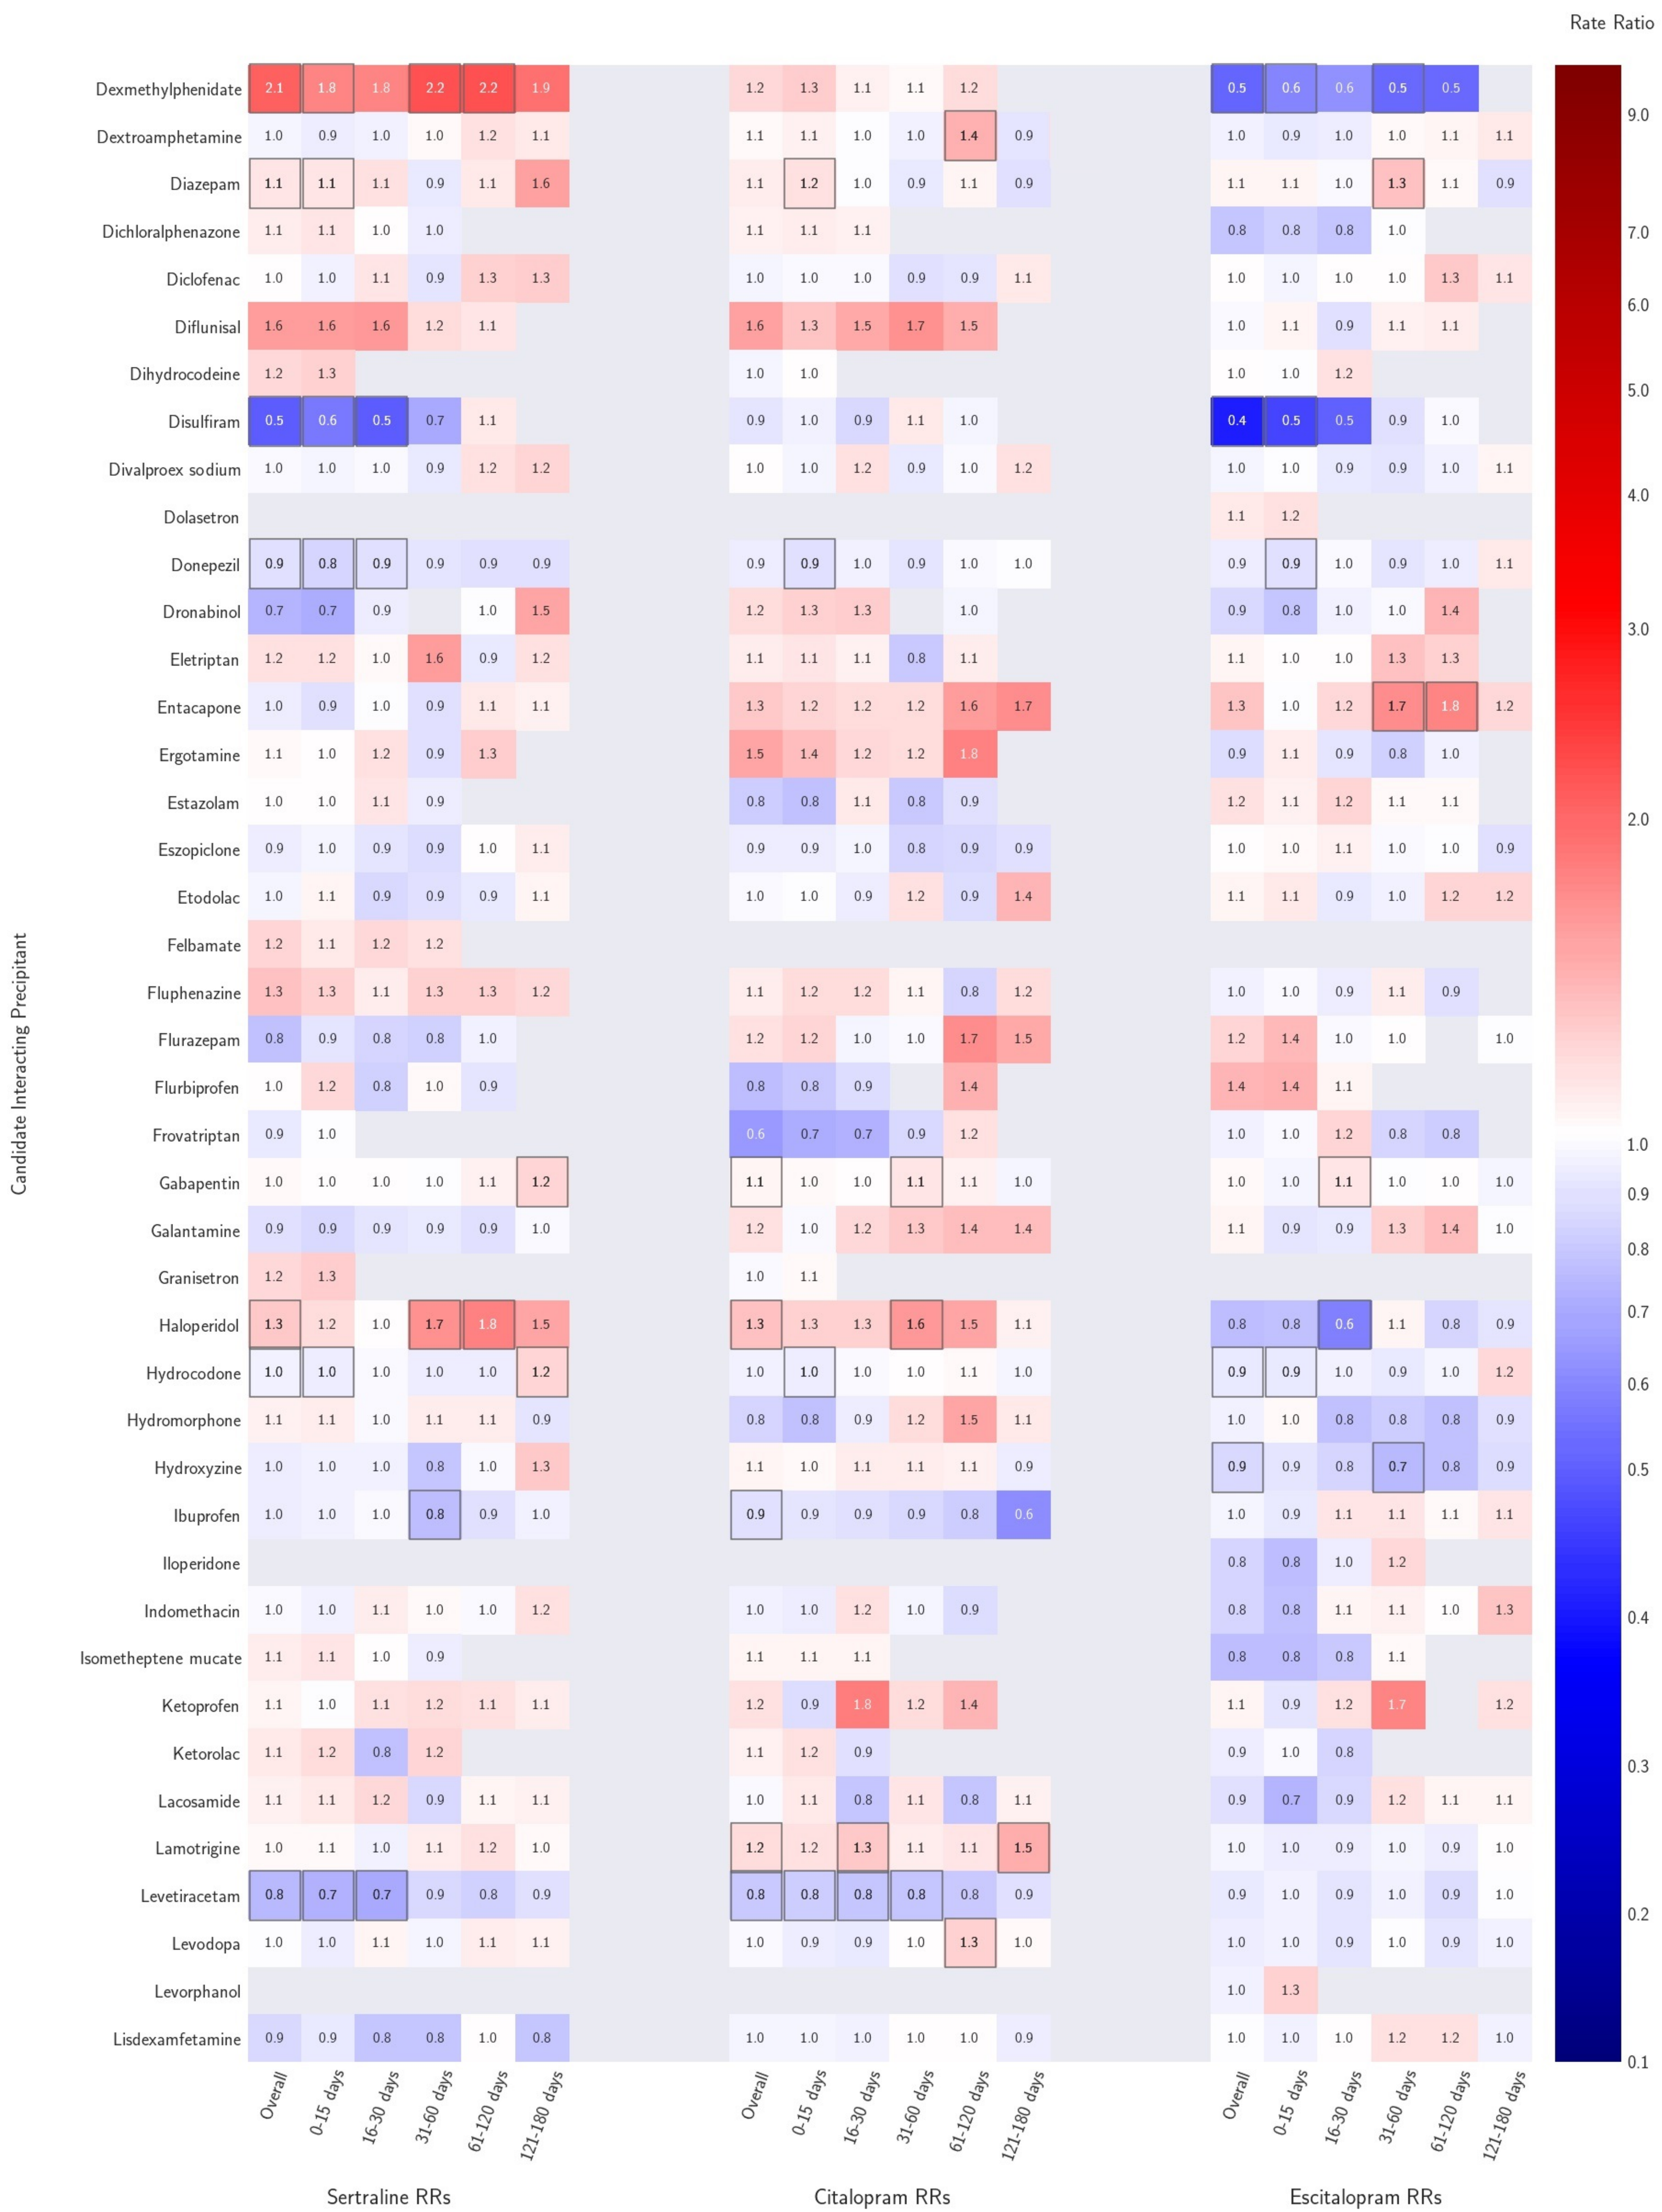



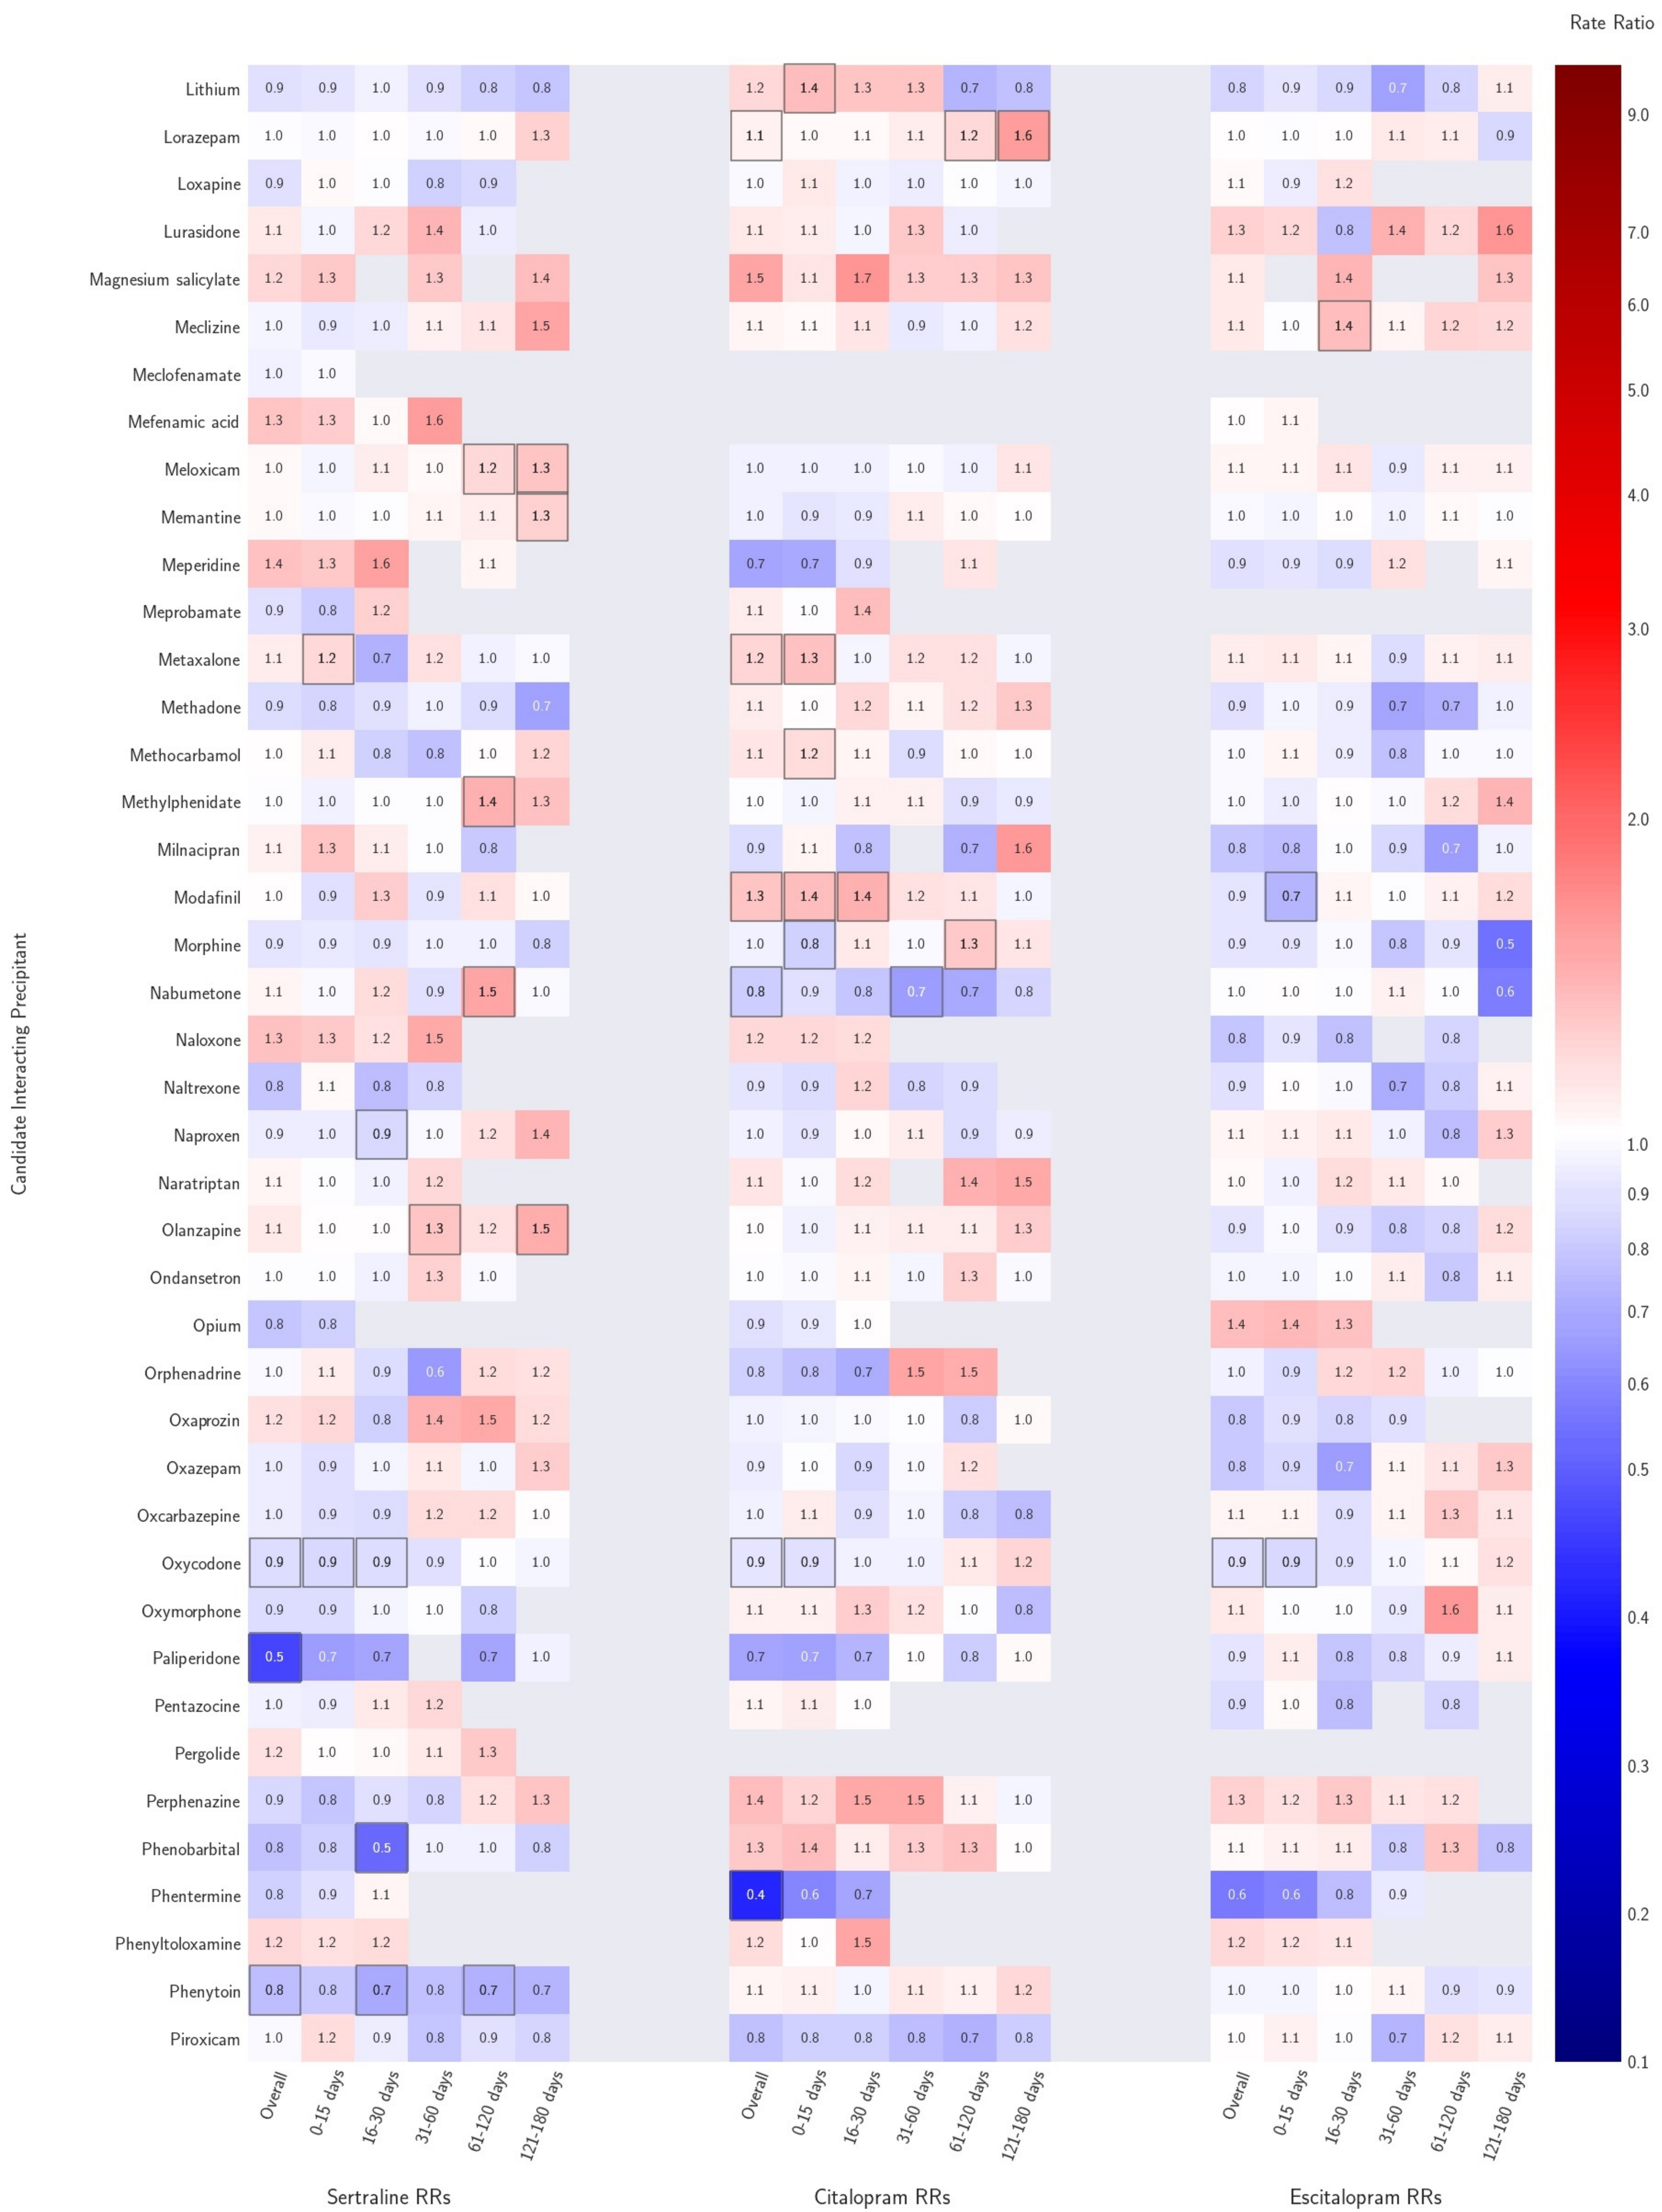



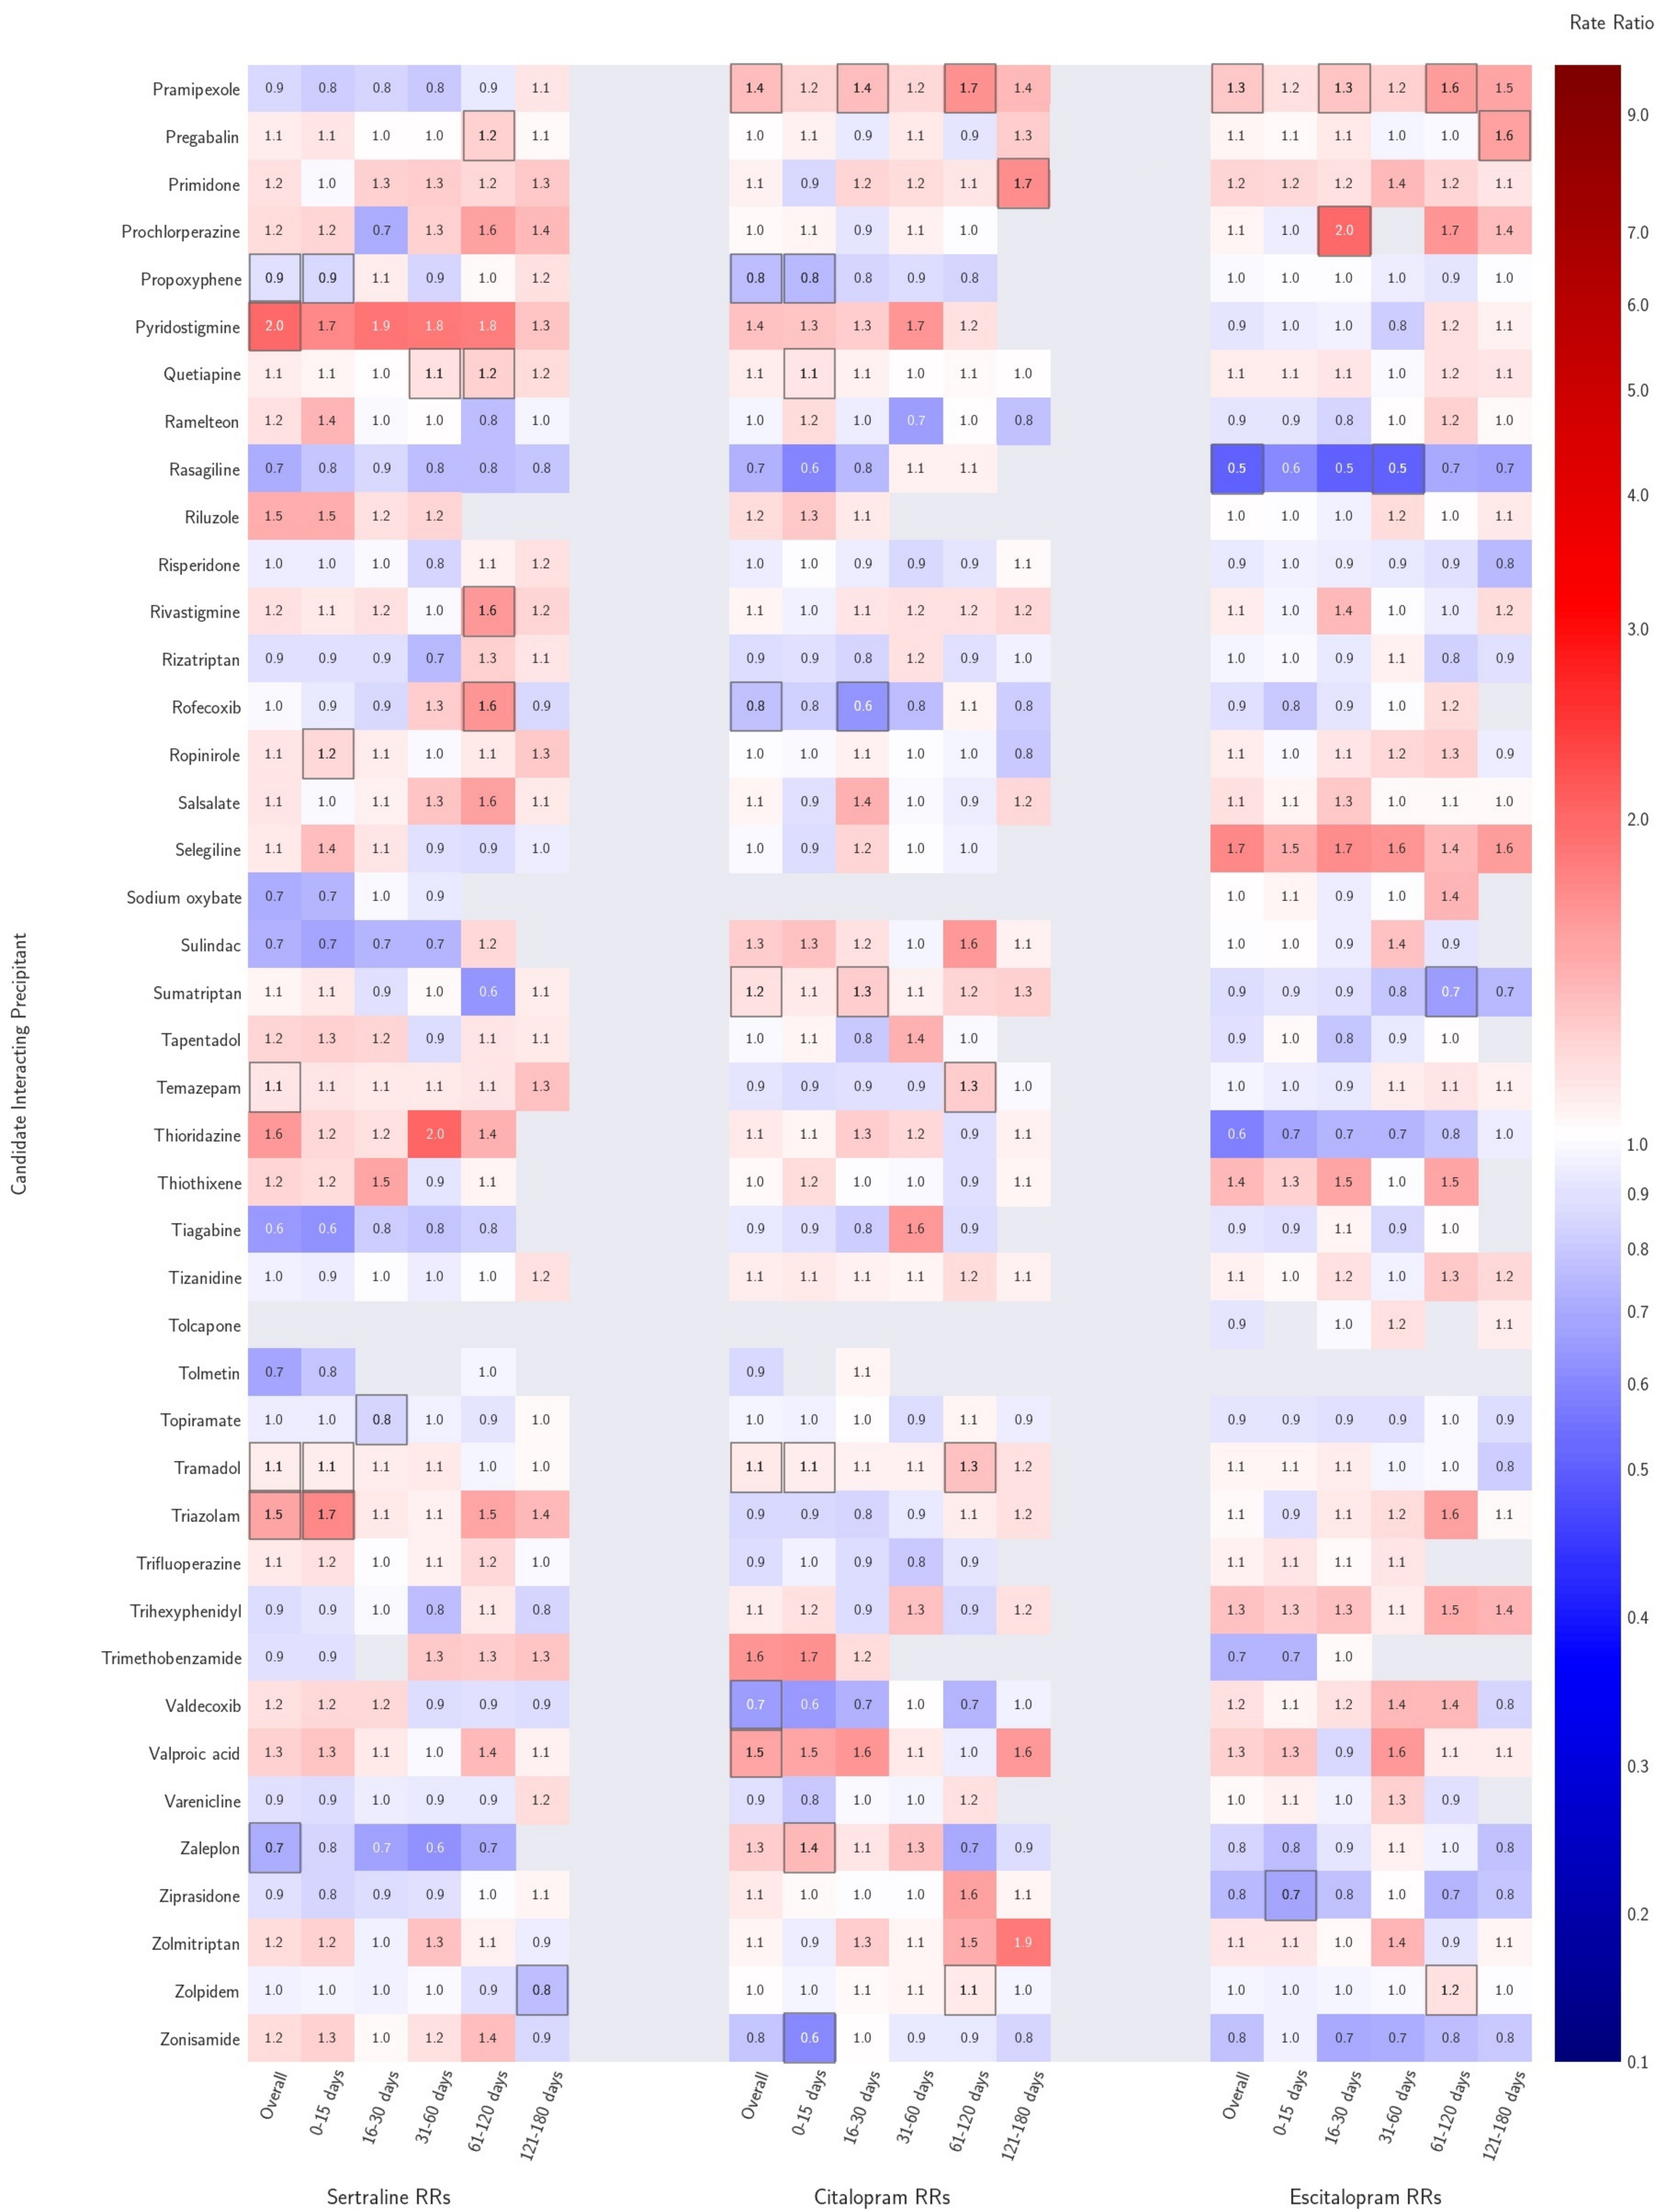



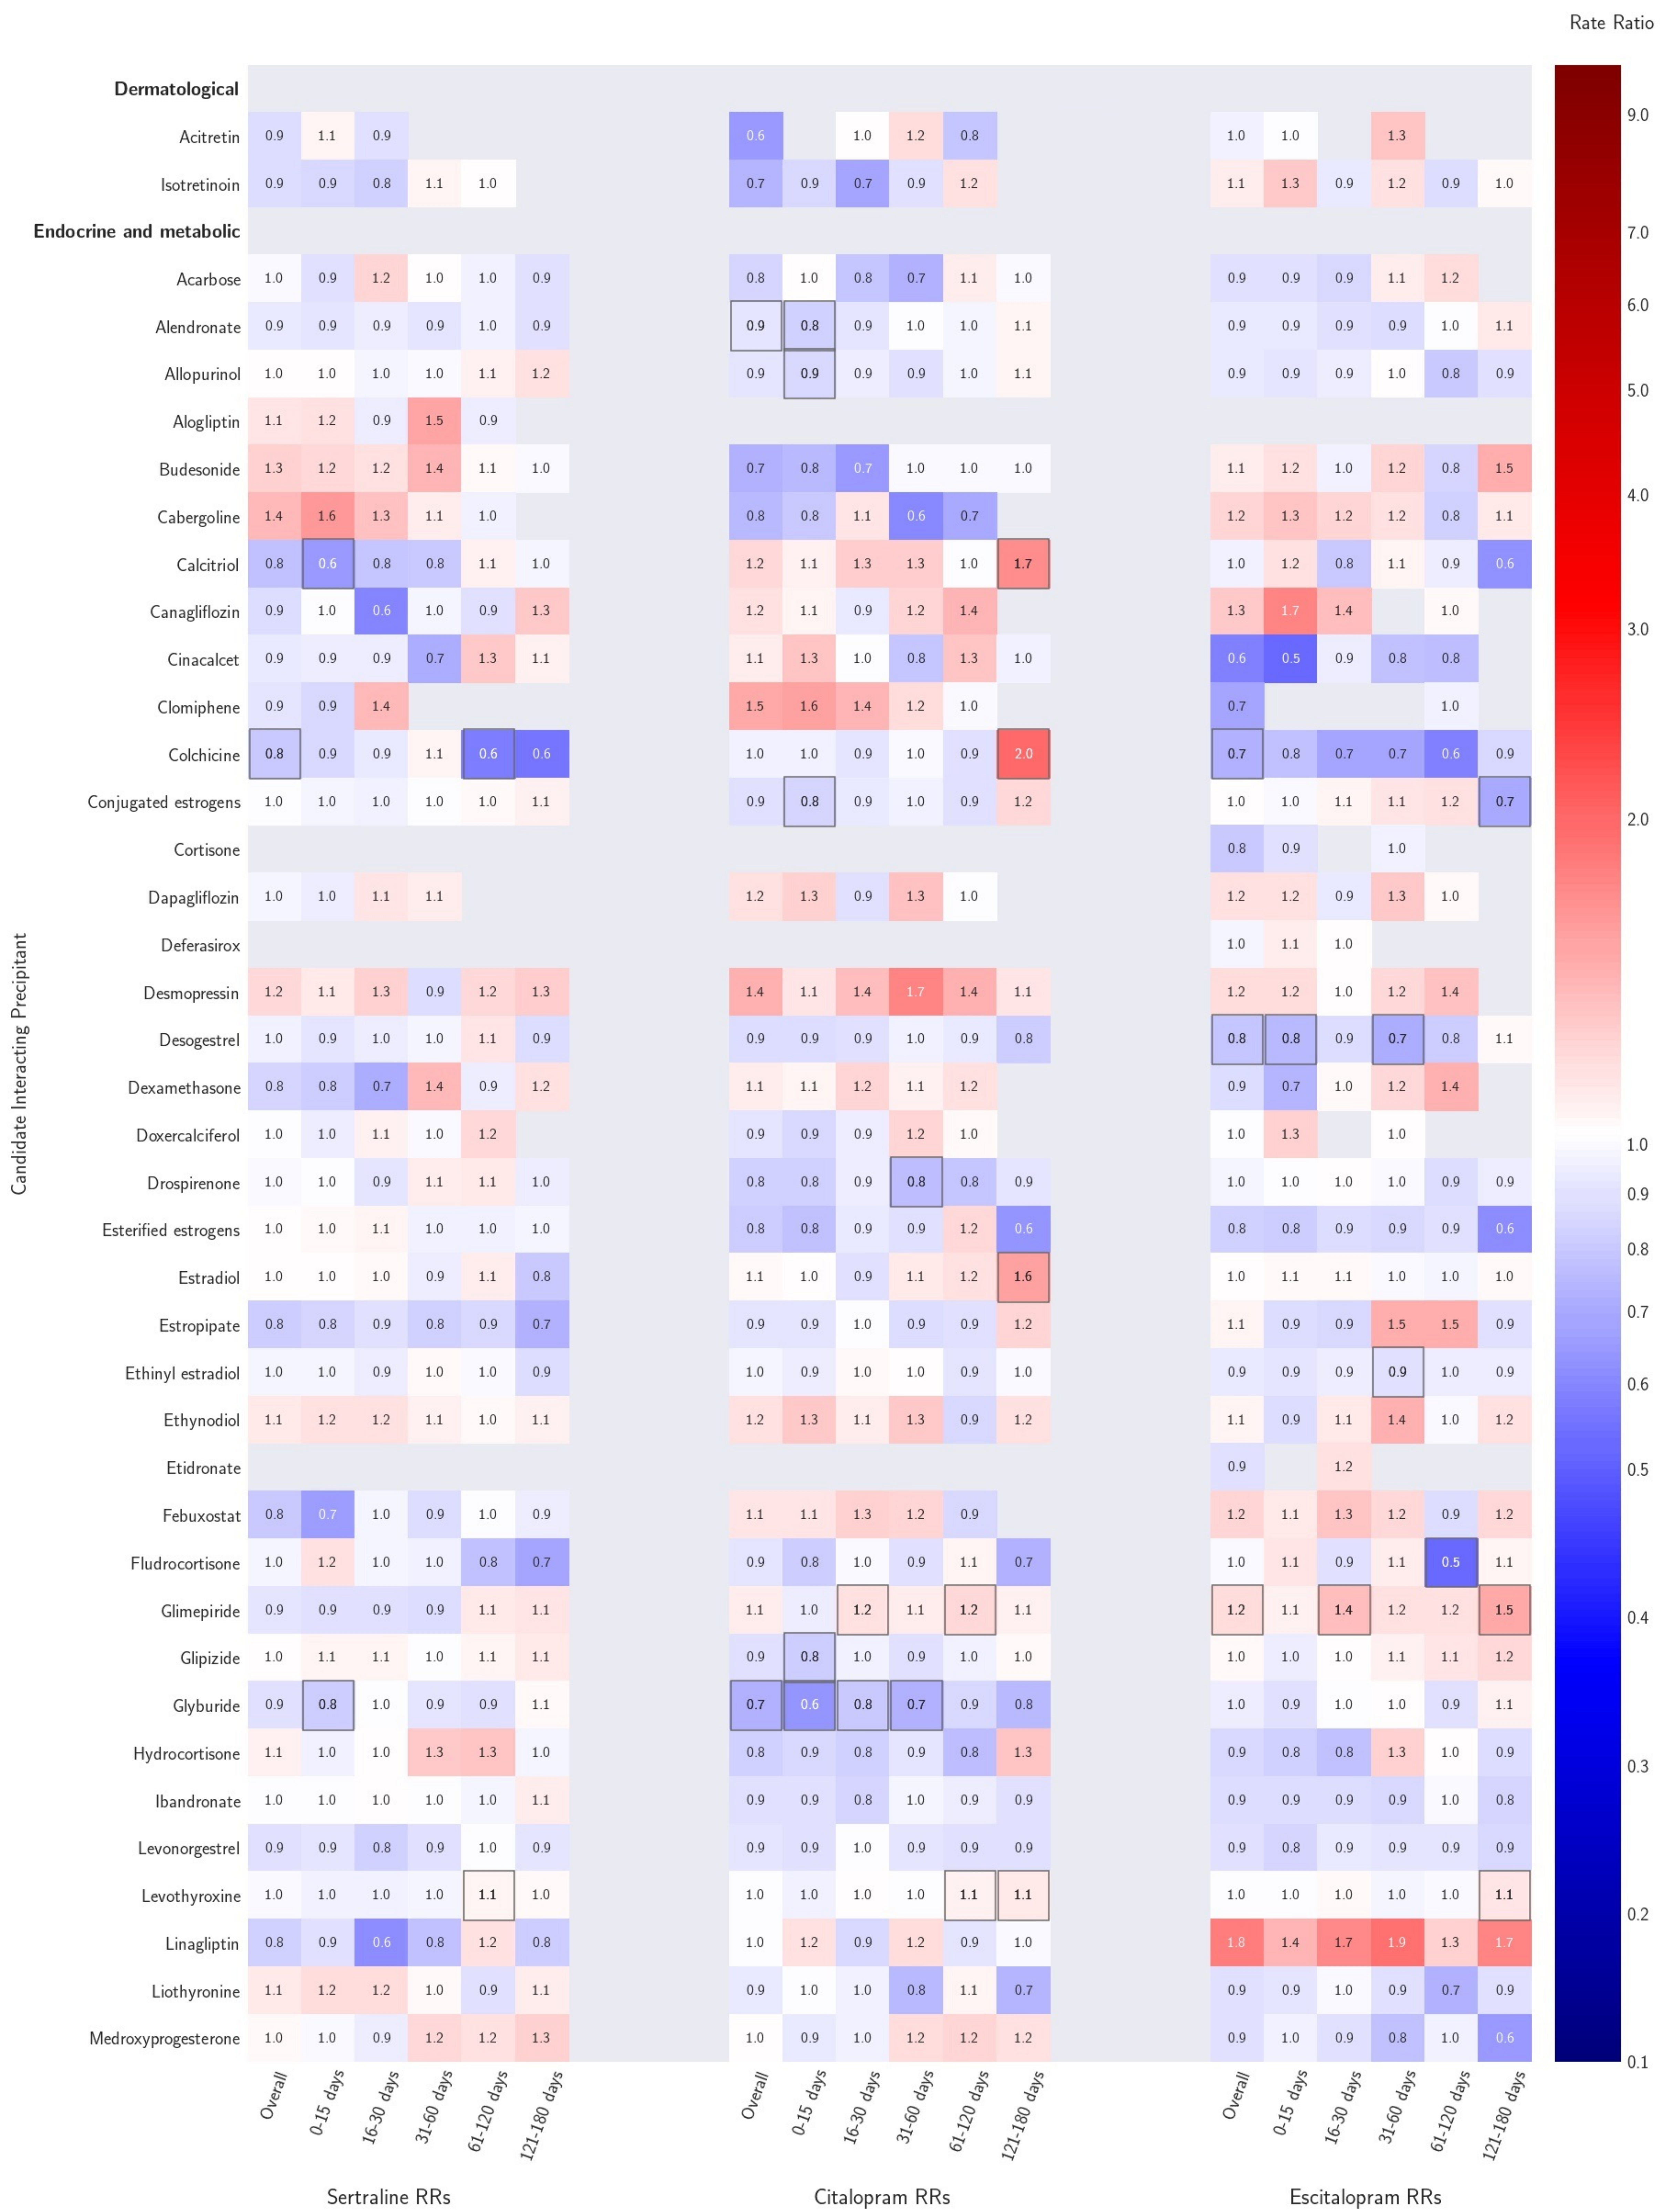



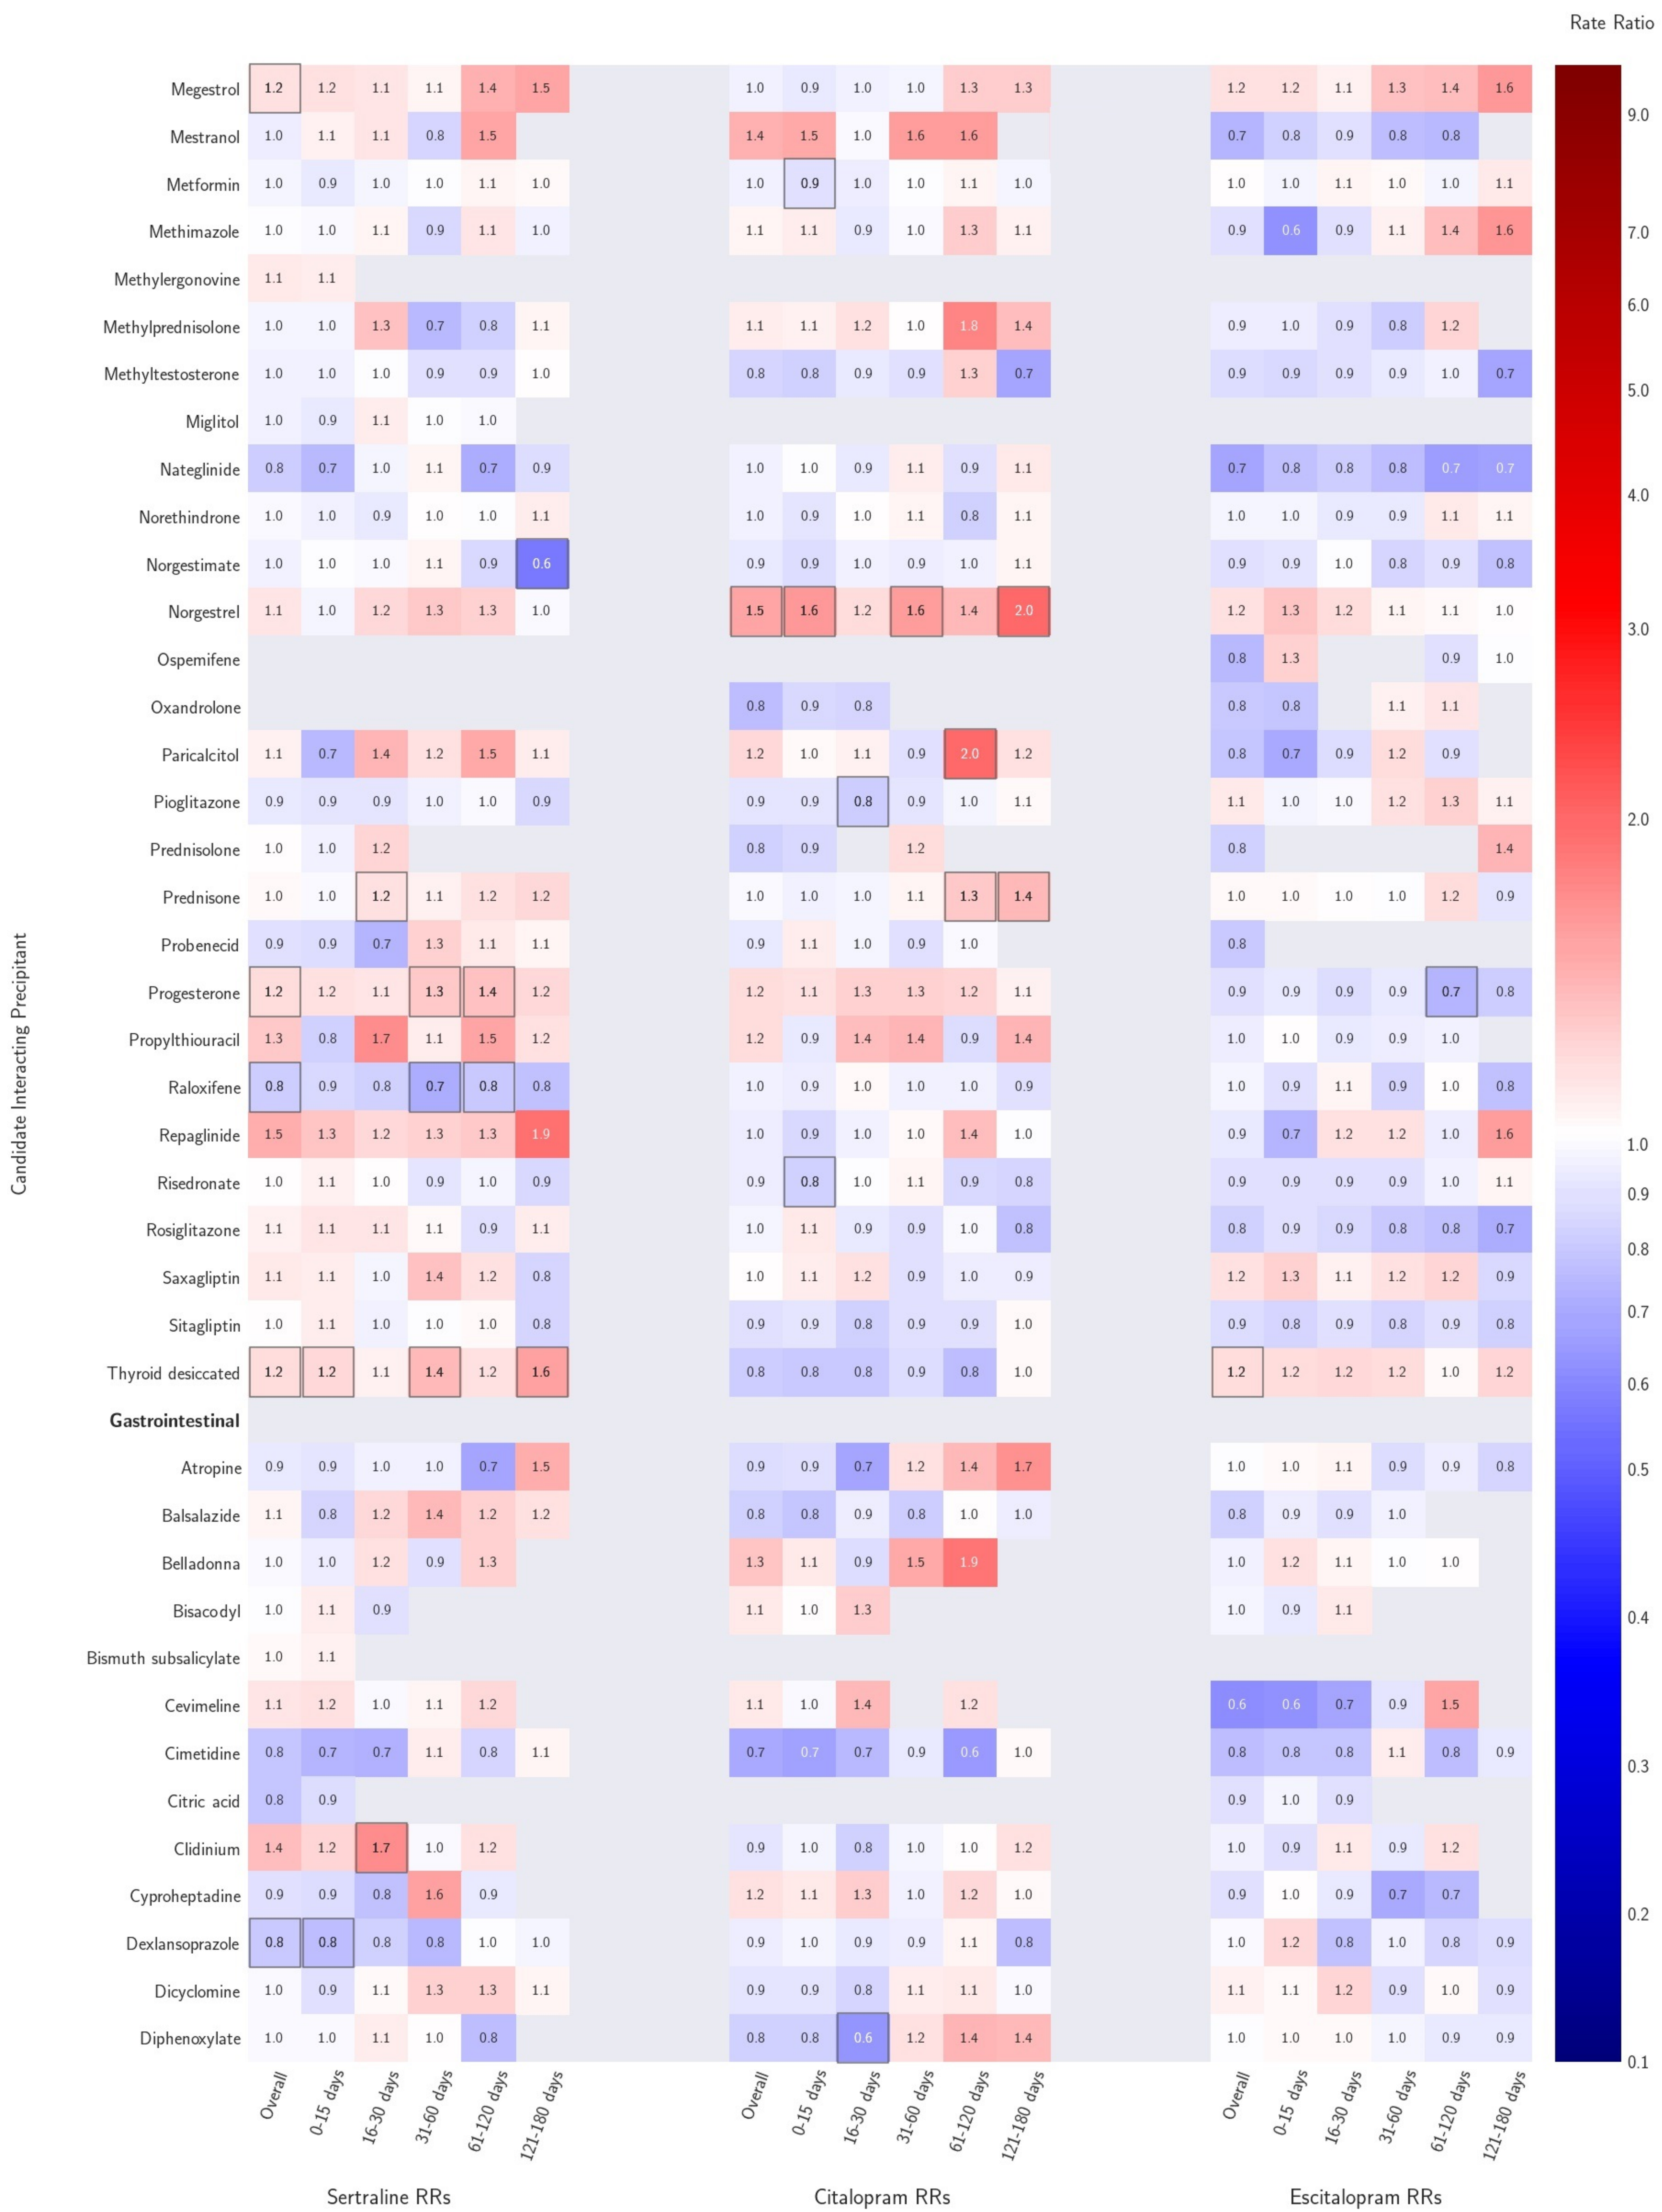



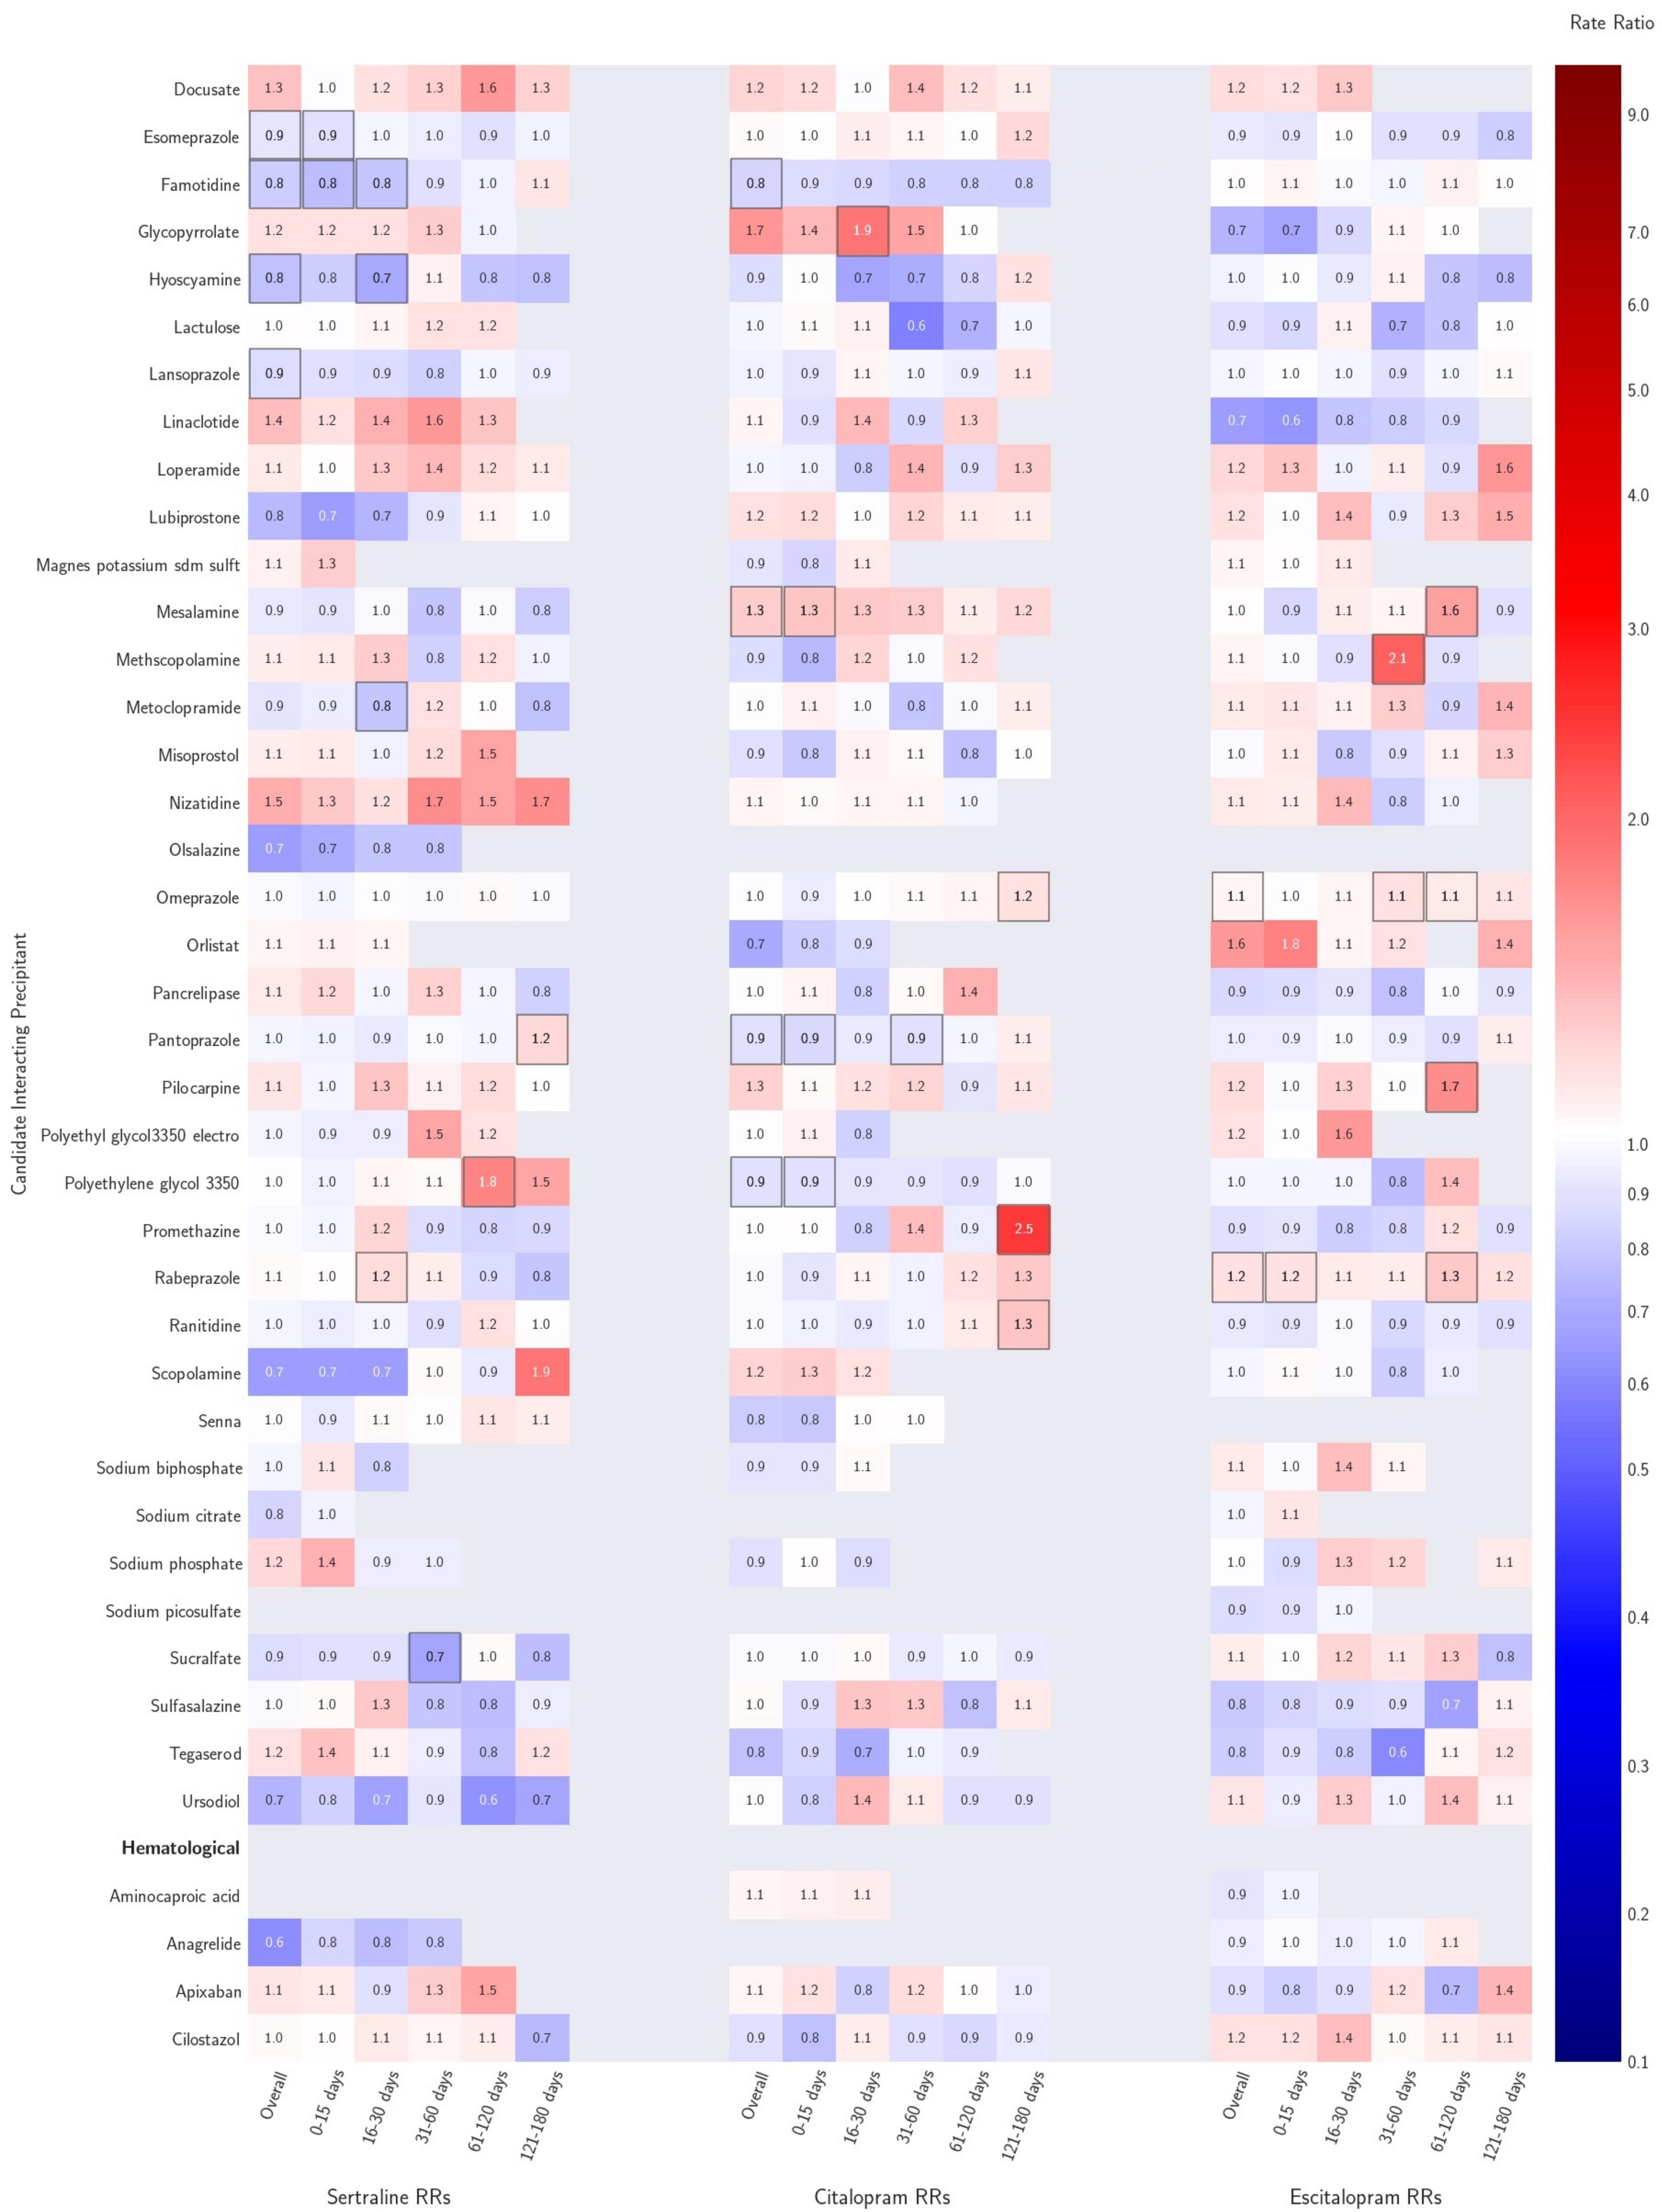



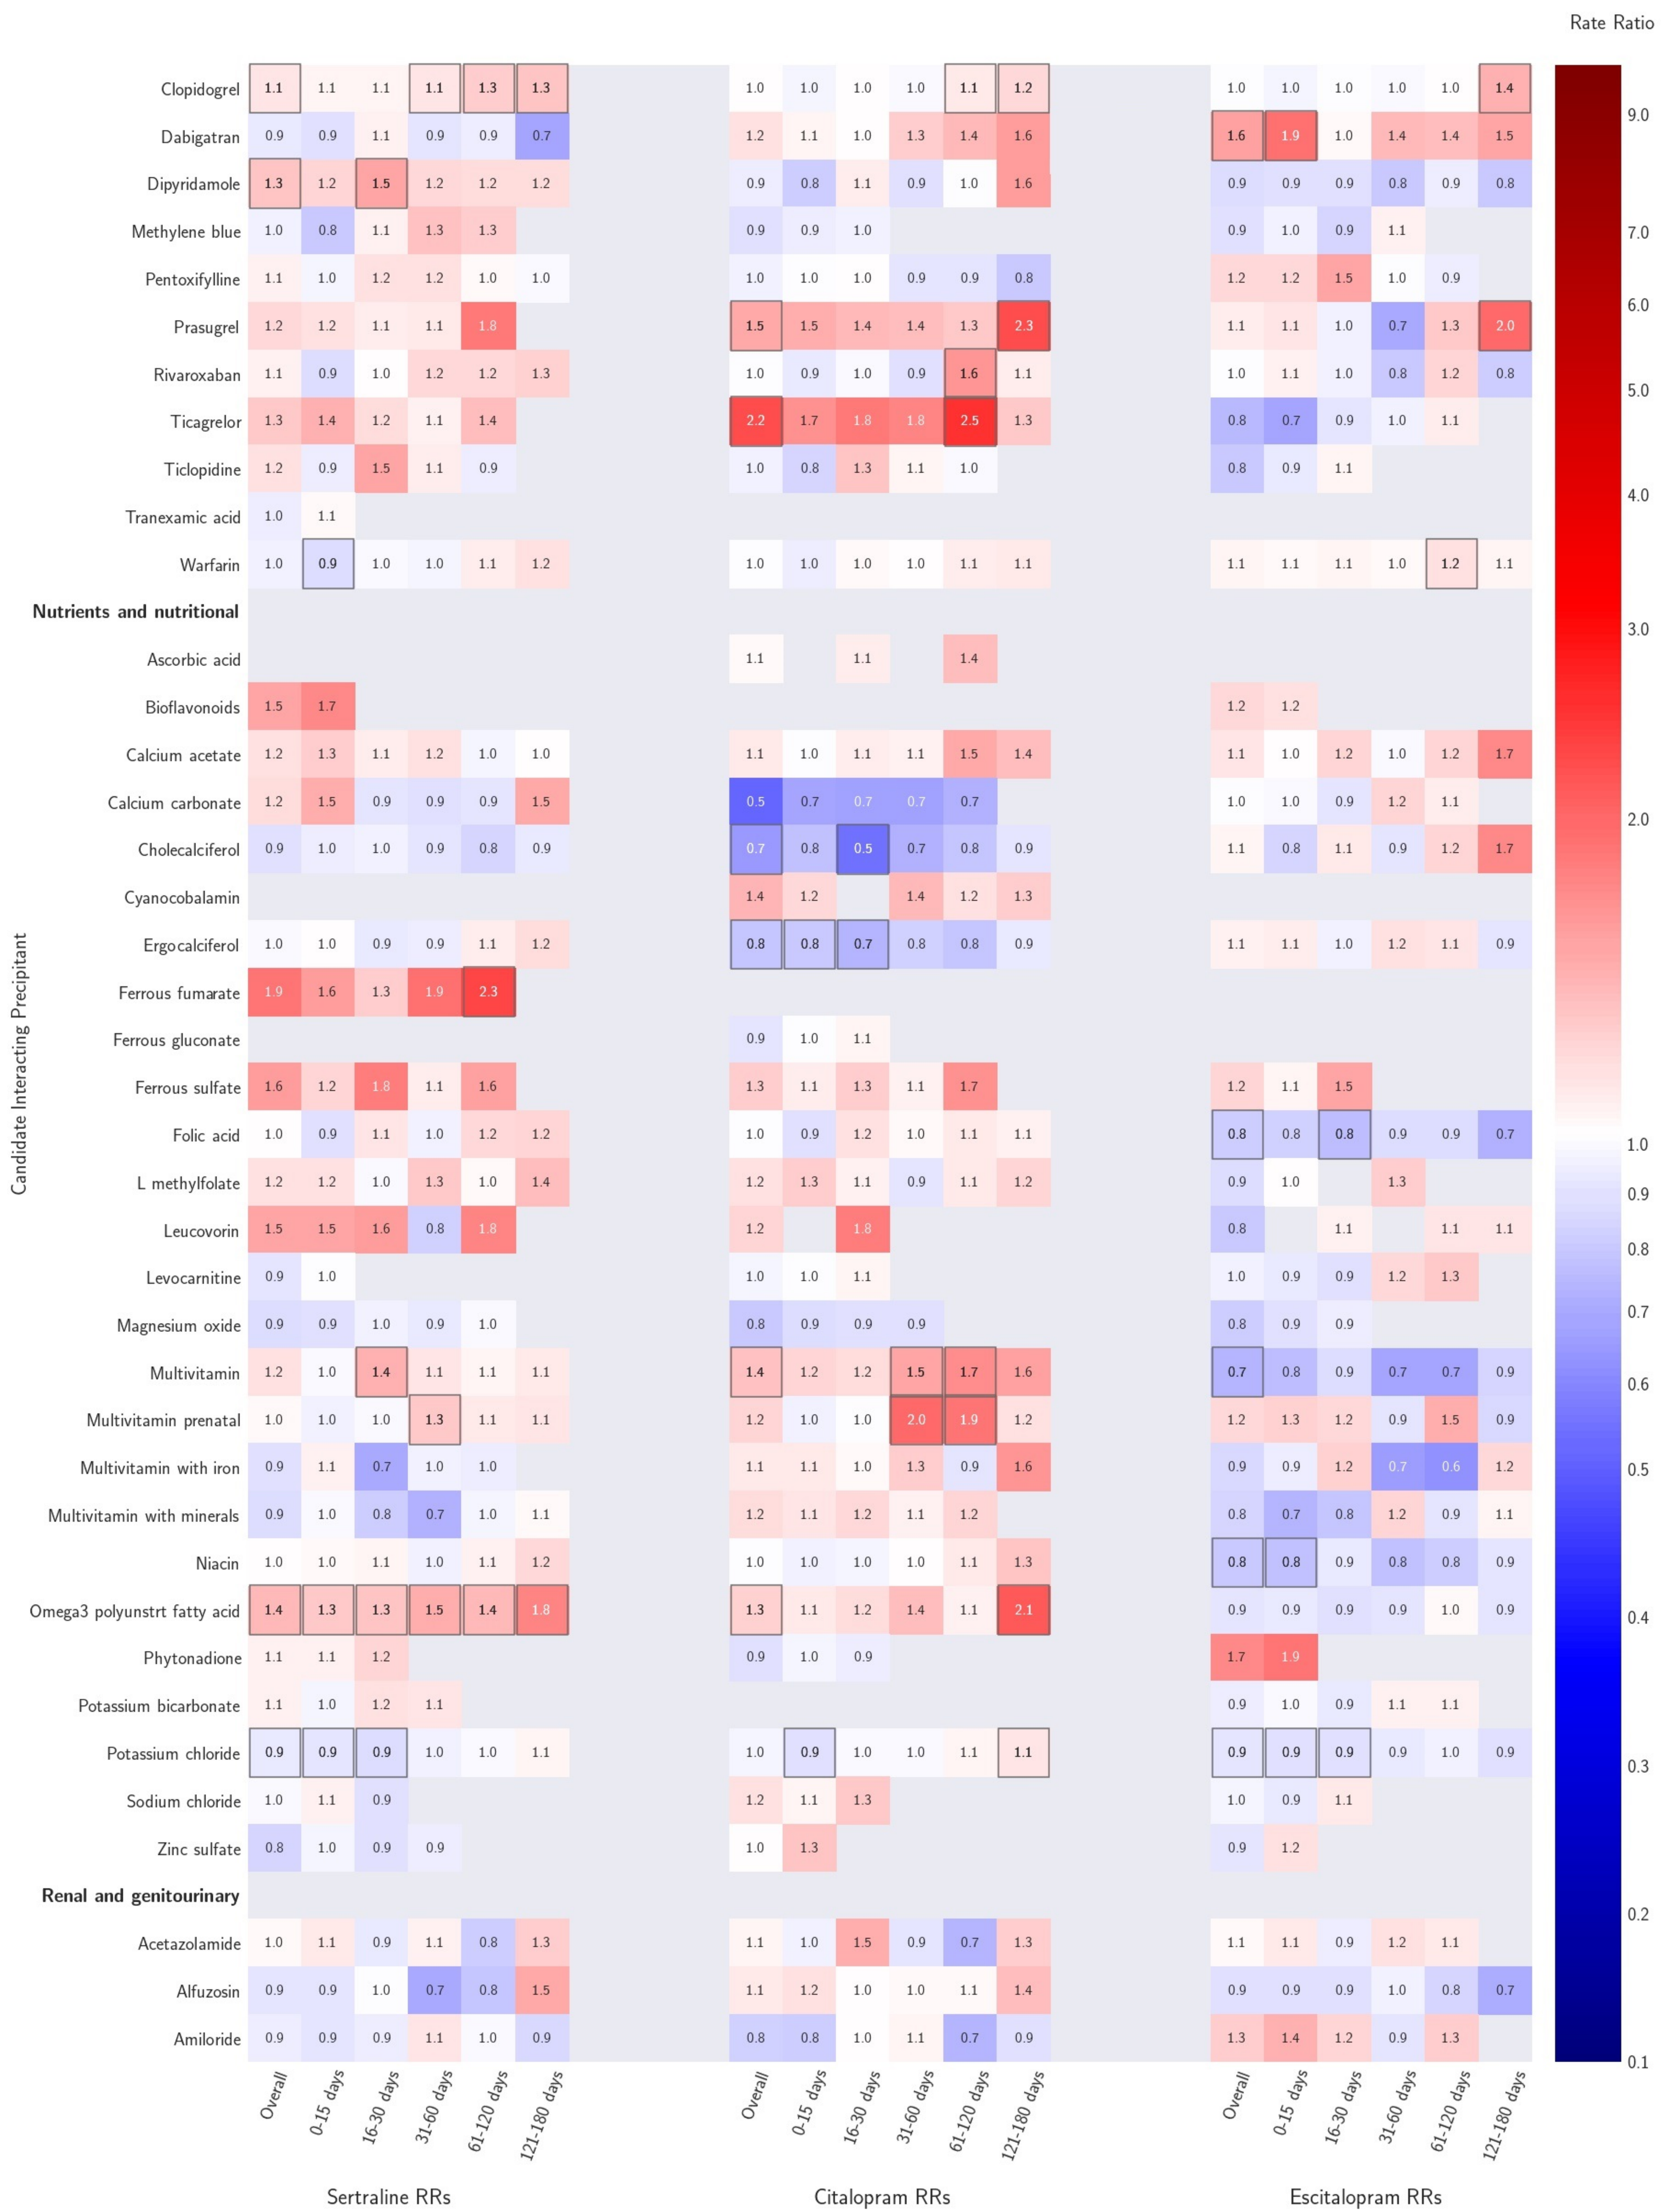



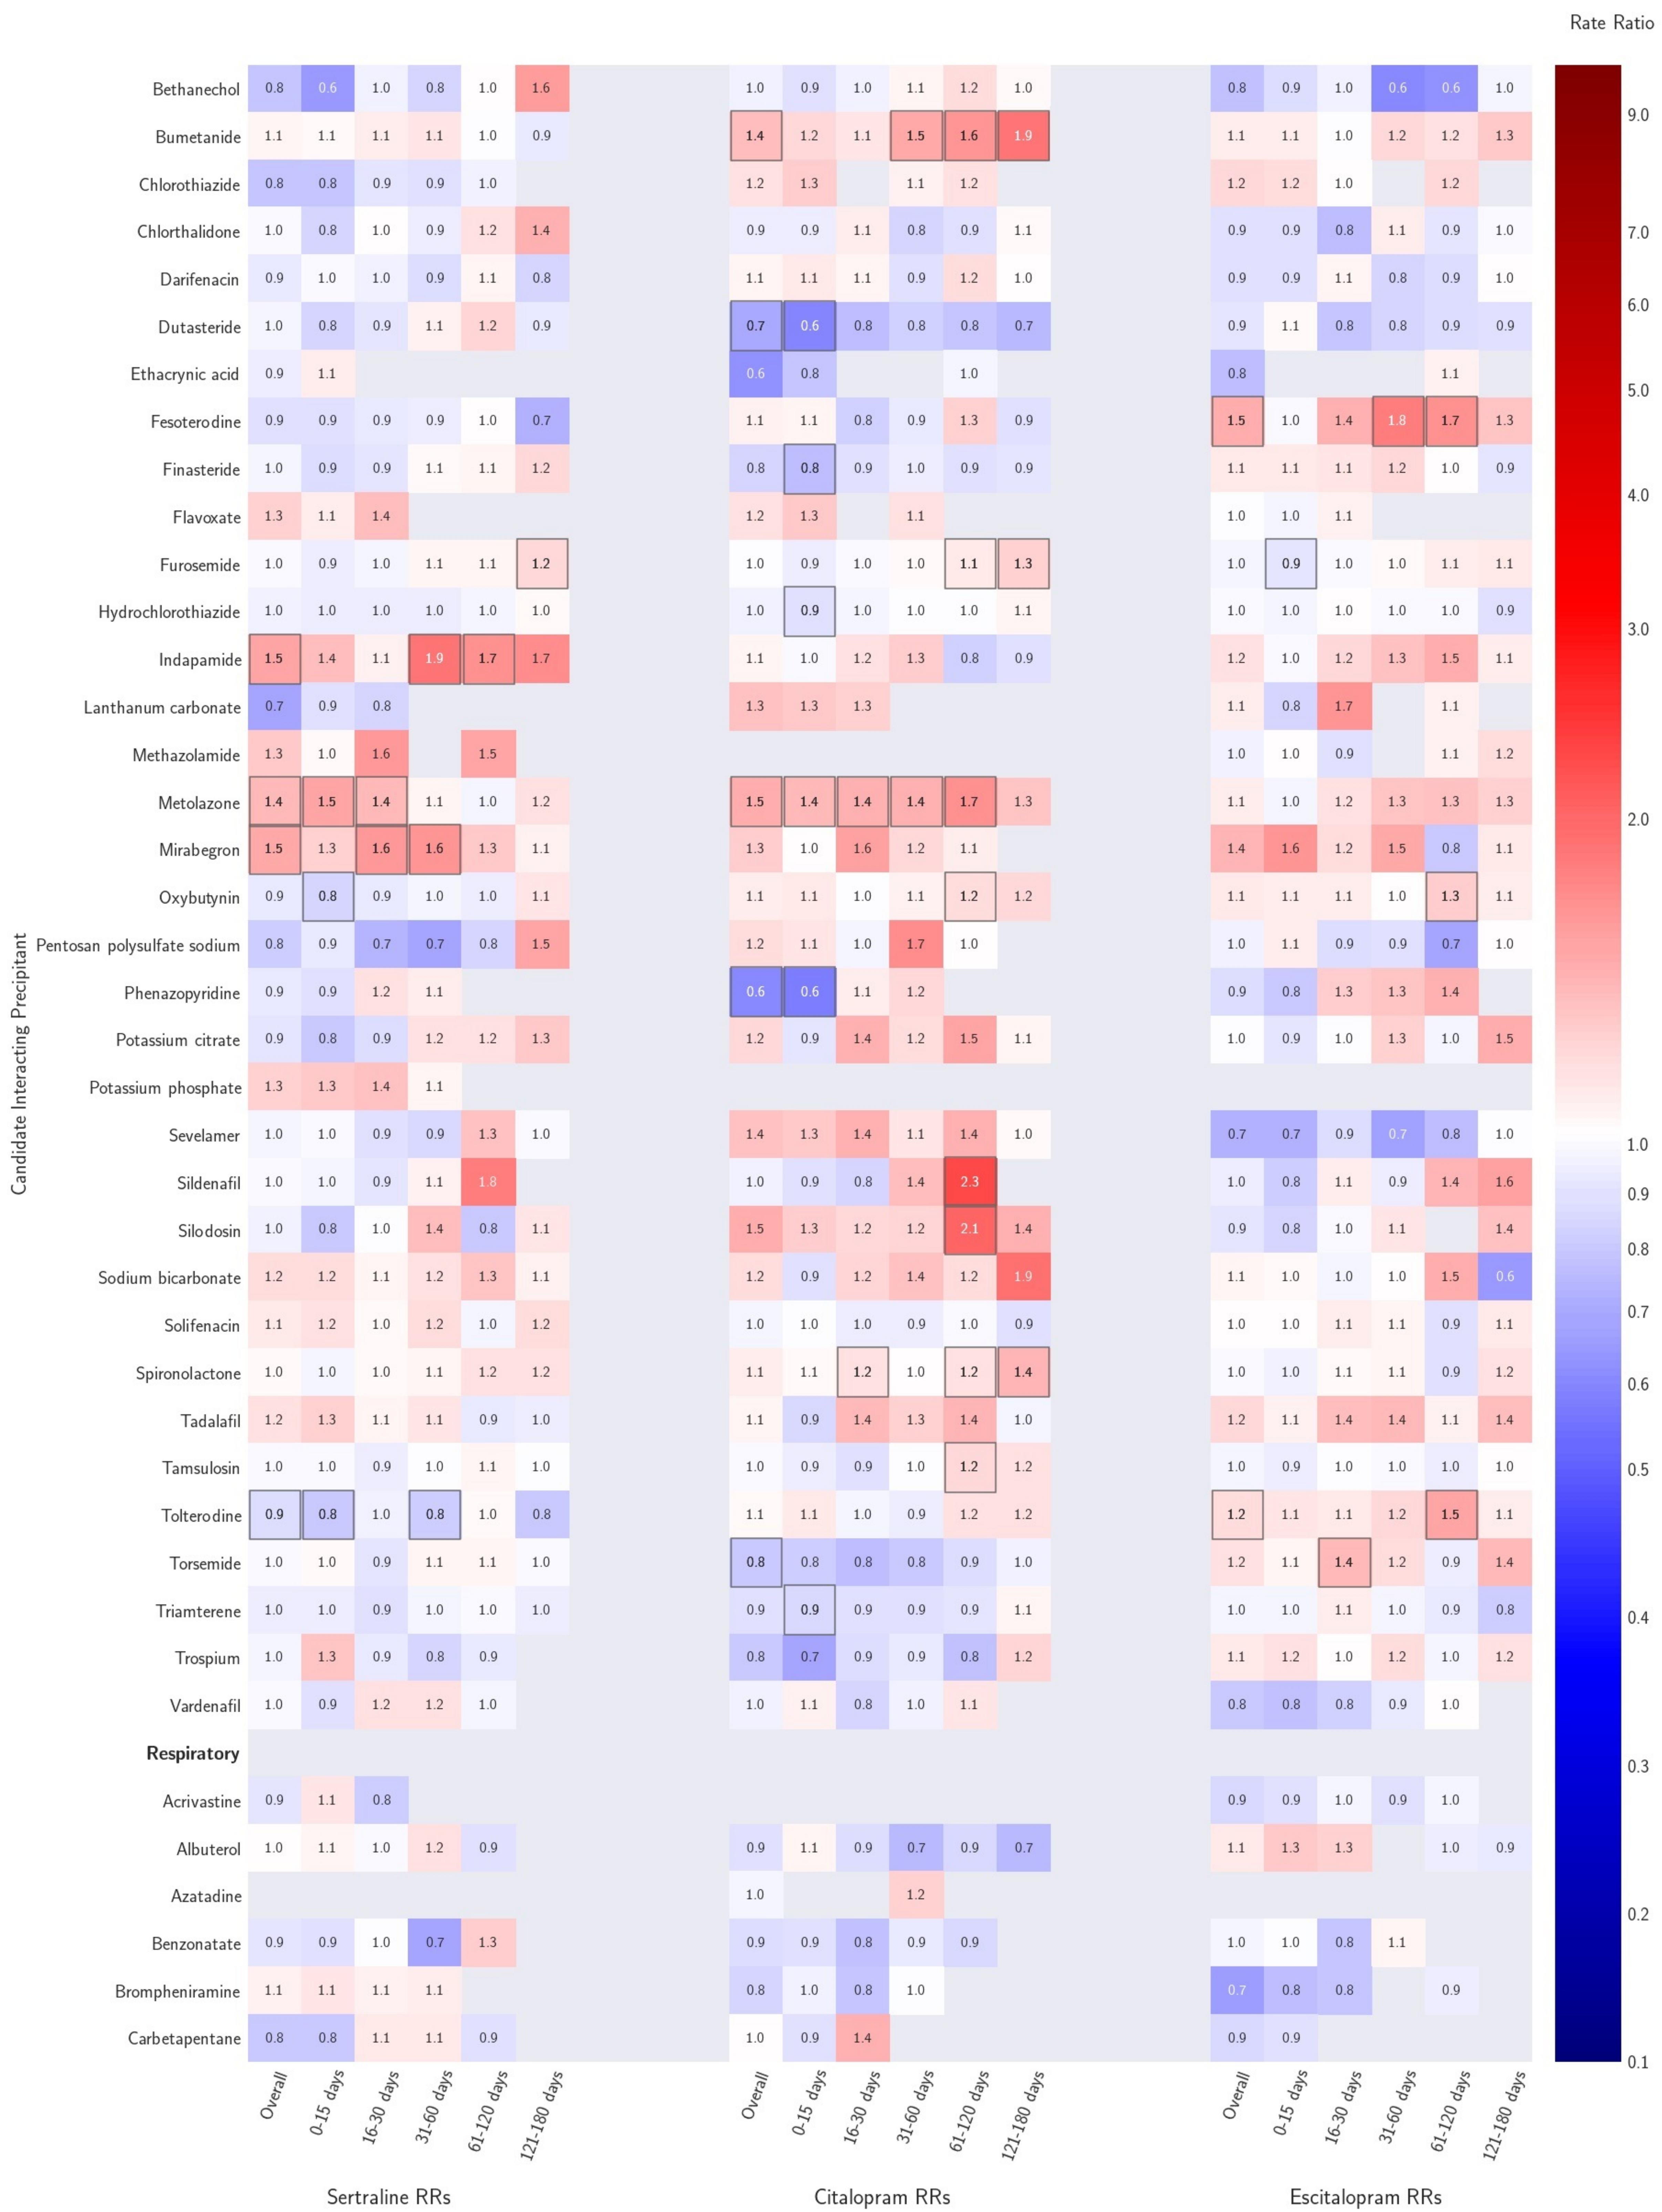



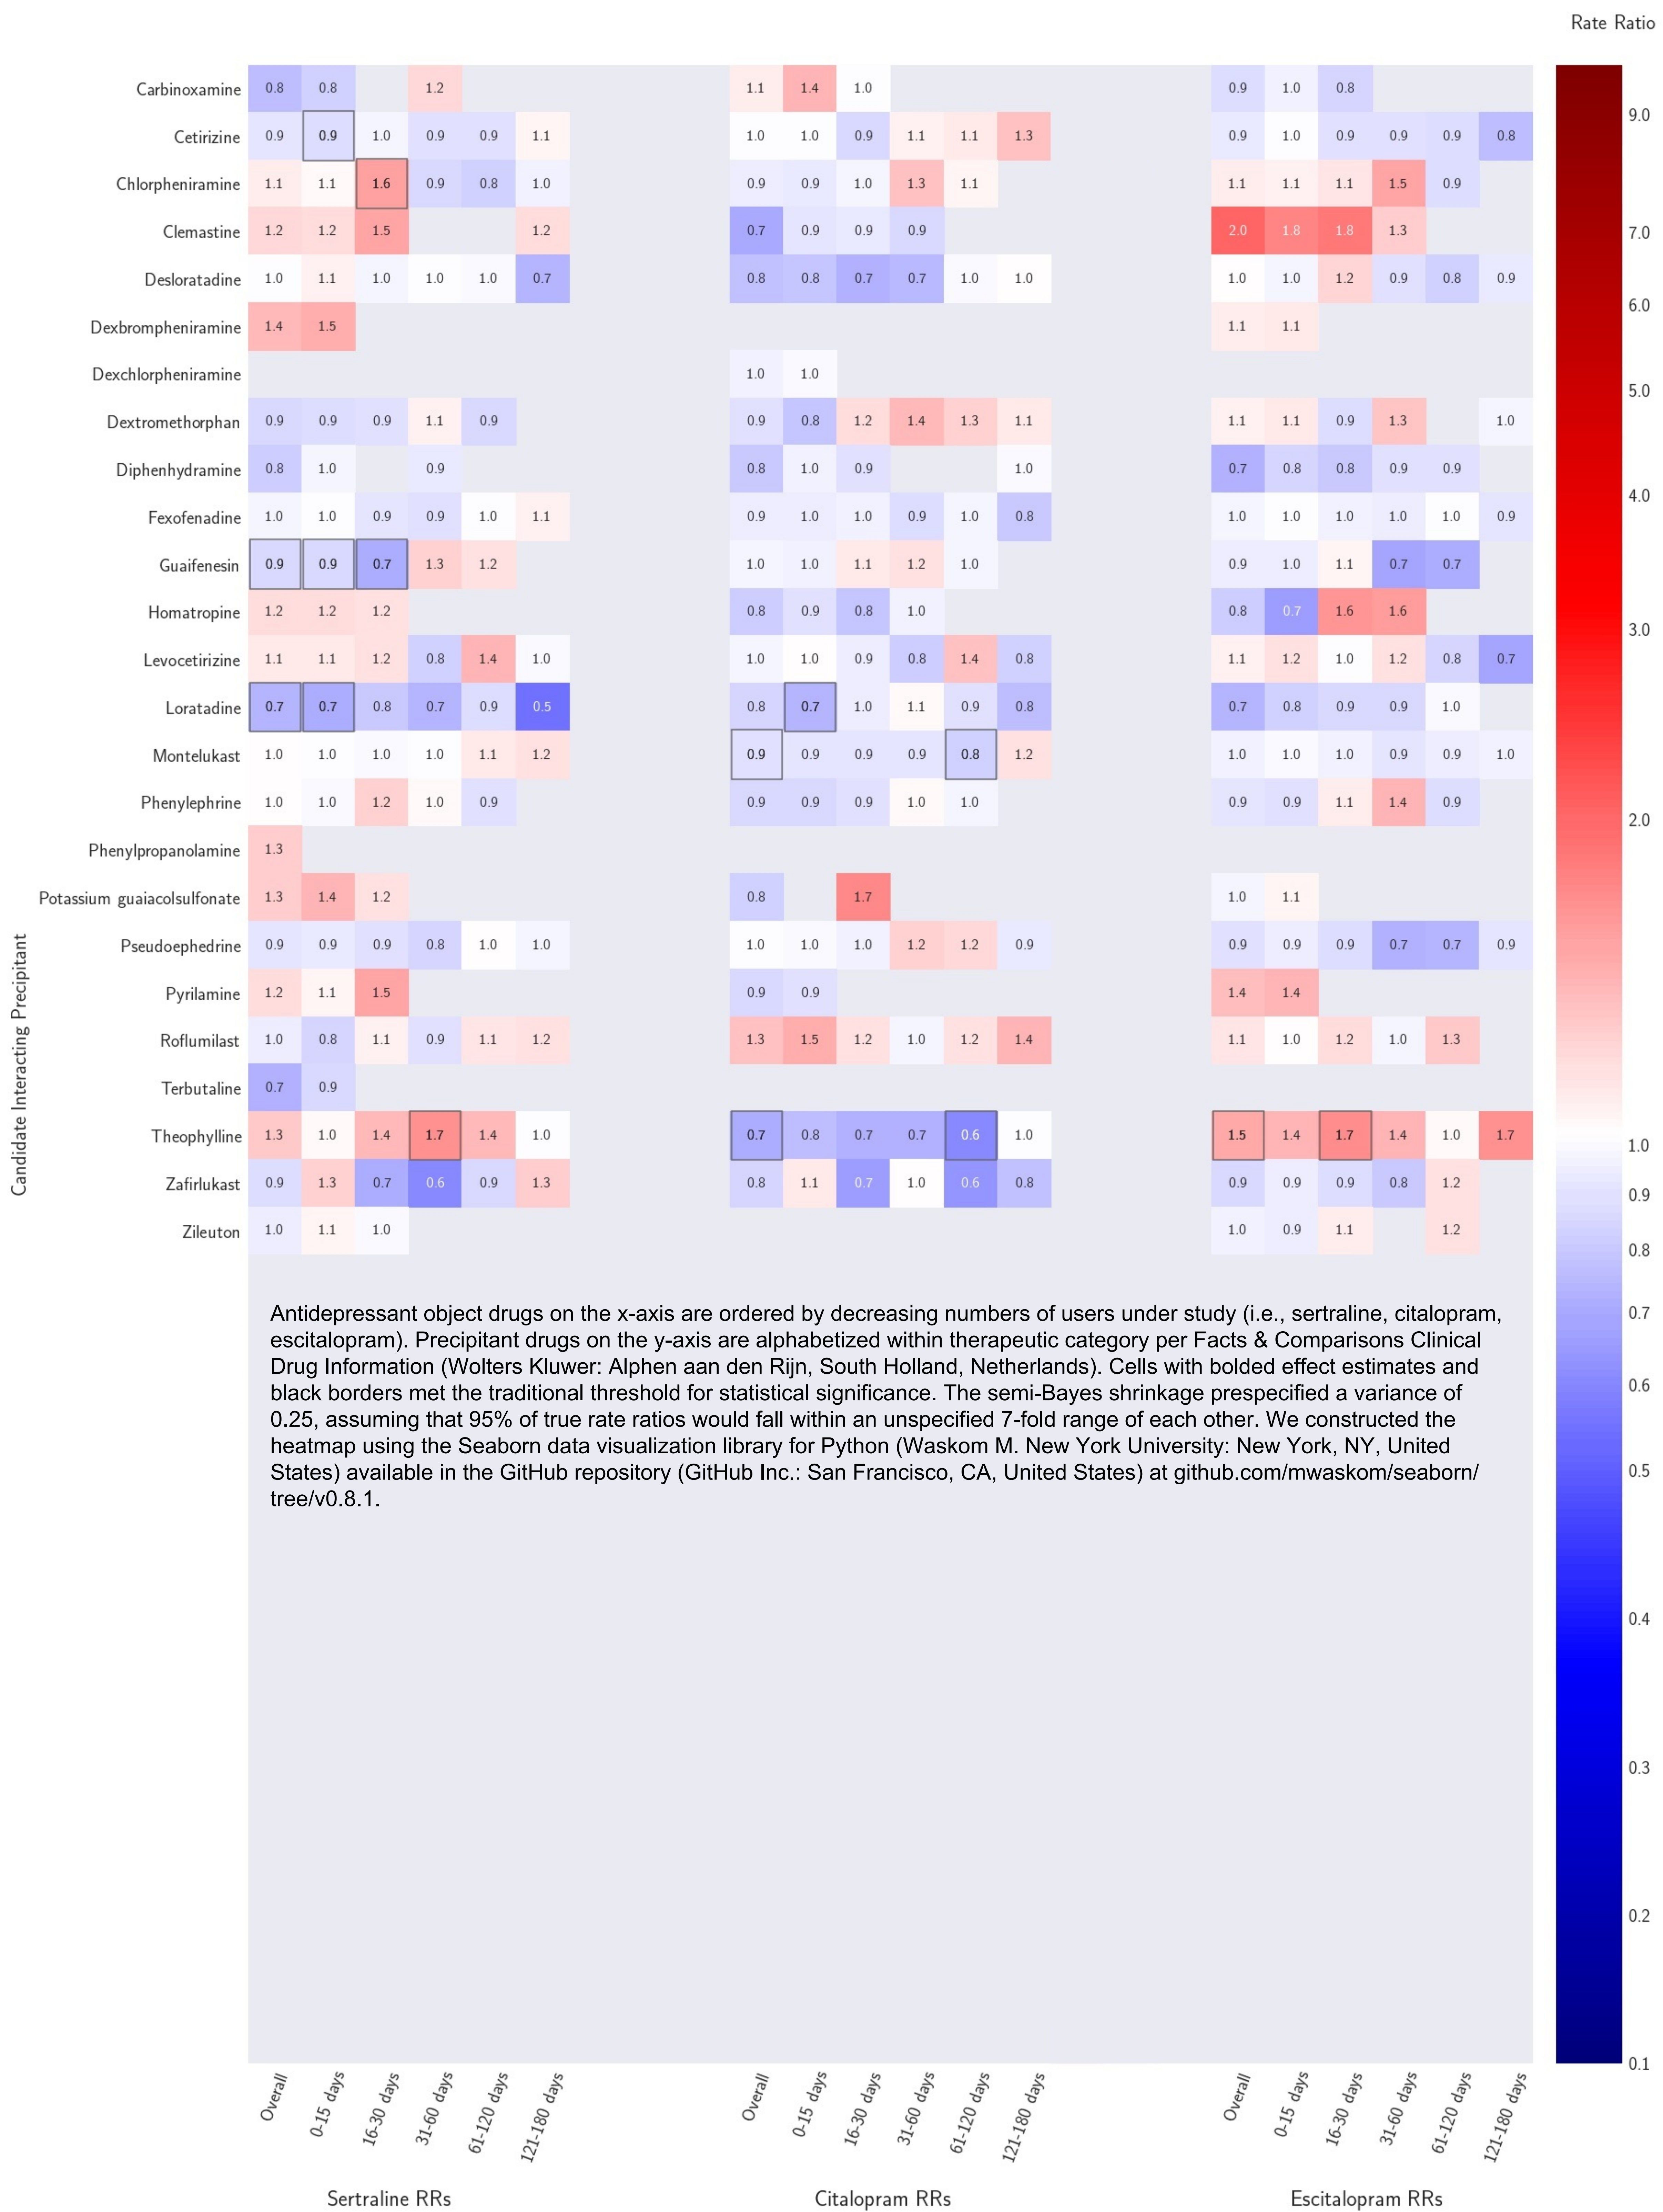

Supplement: NIHMS1674792-supplement-FIG_S3.pdf [file NIHMS1674792-supplement-FIG_S3.pdf]
