# Supplementary material
Source: PubMed Central journal article supplement (PMC8316258)

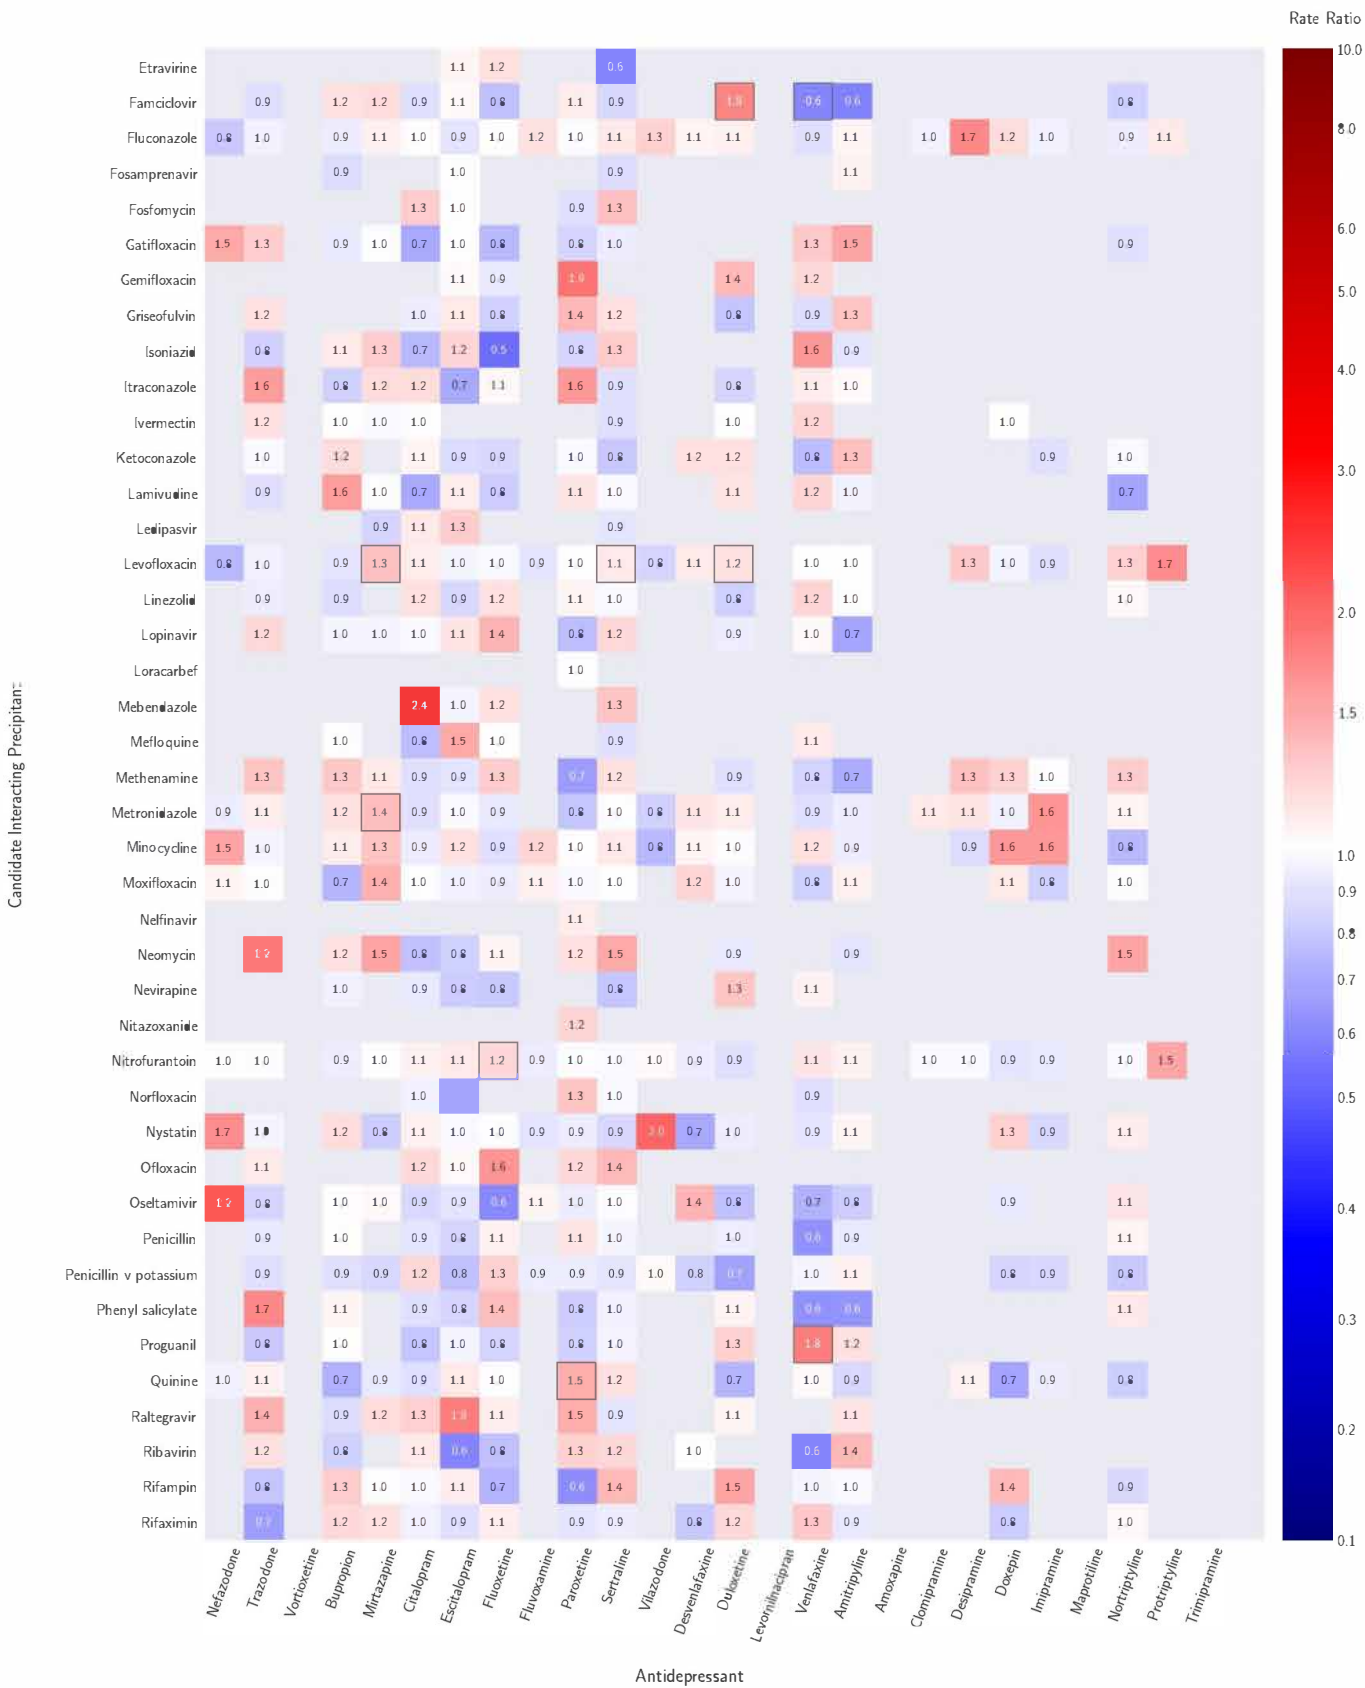



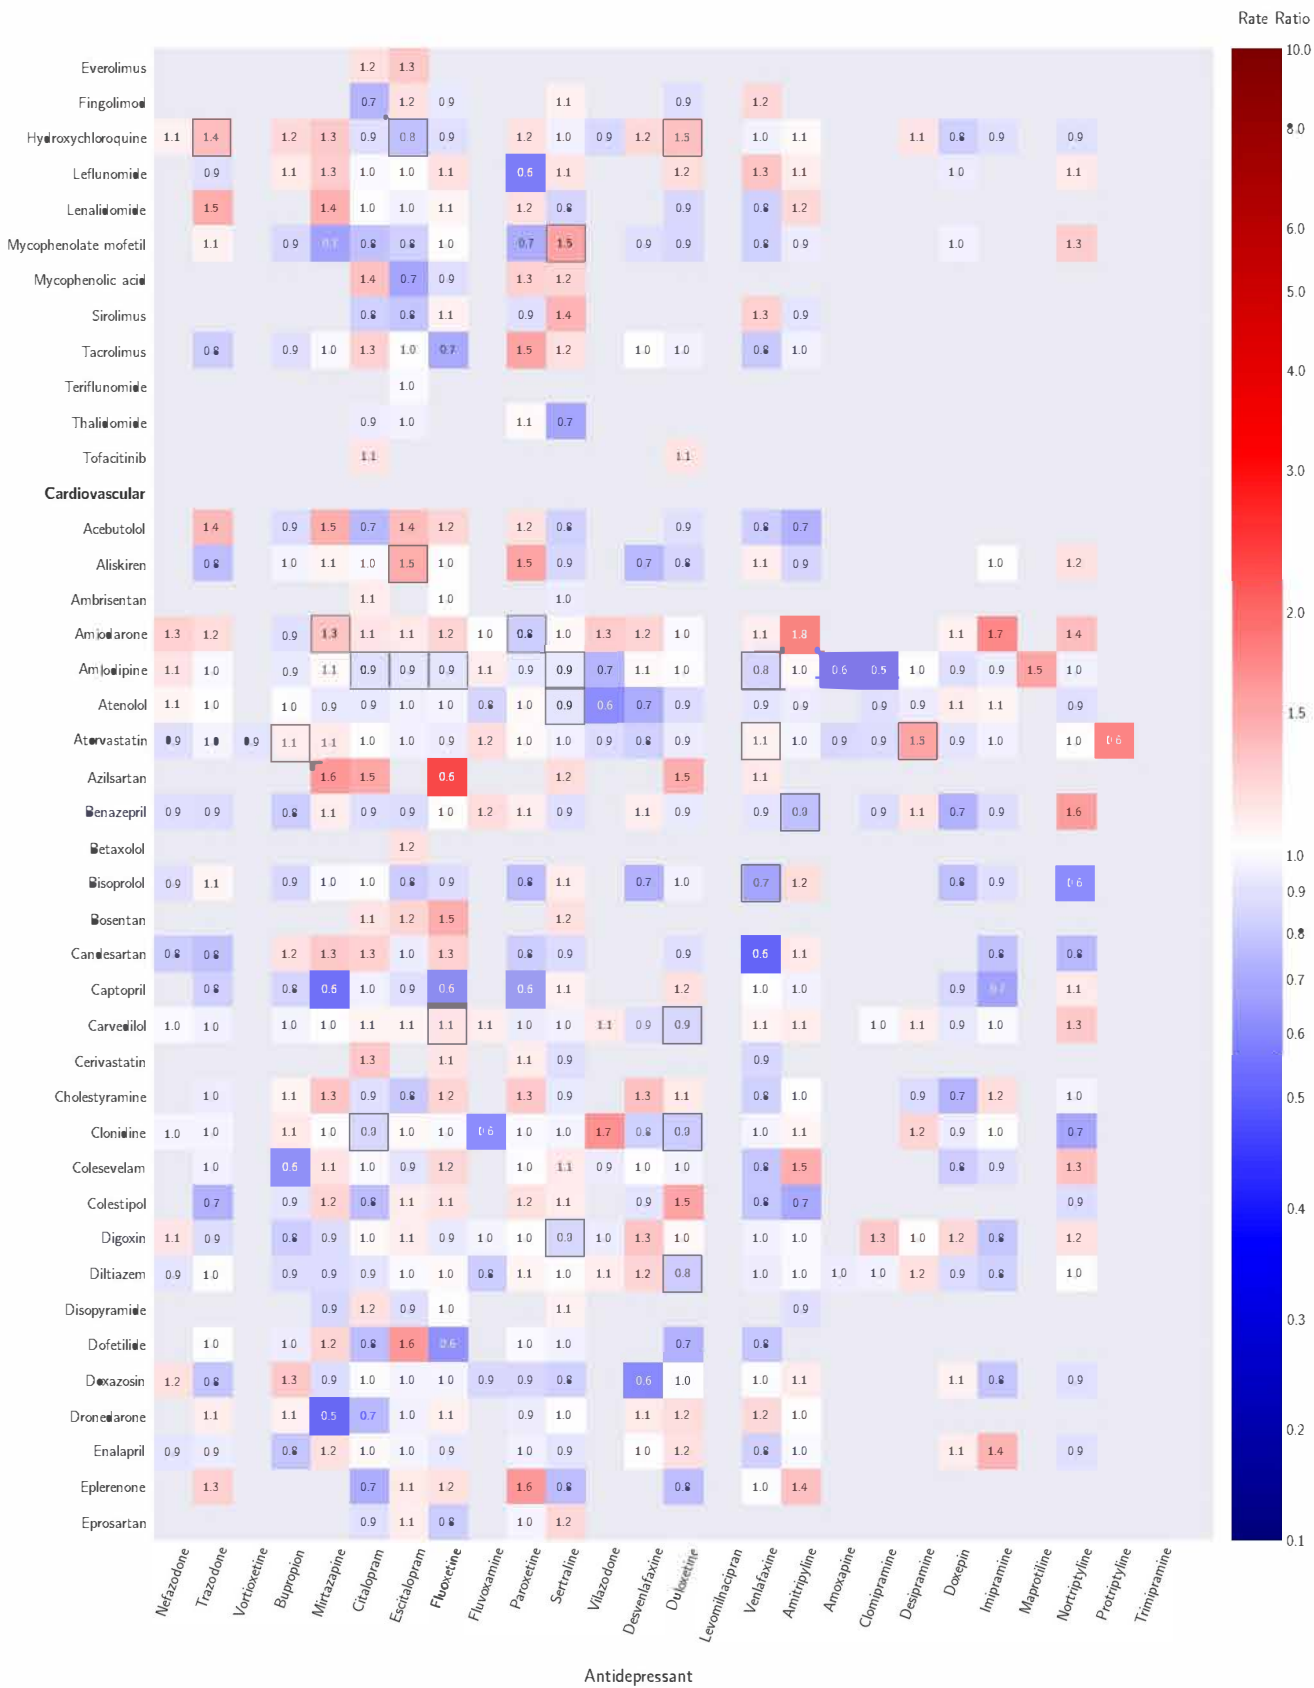

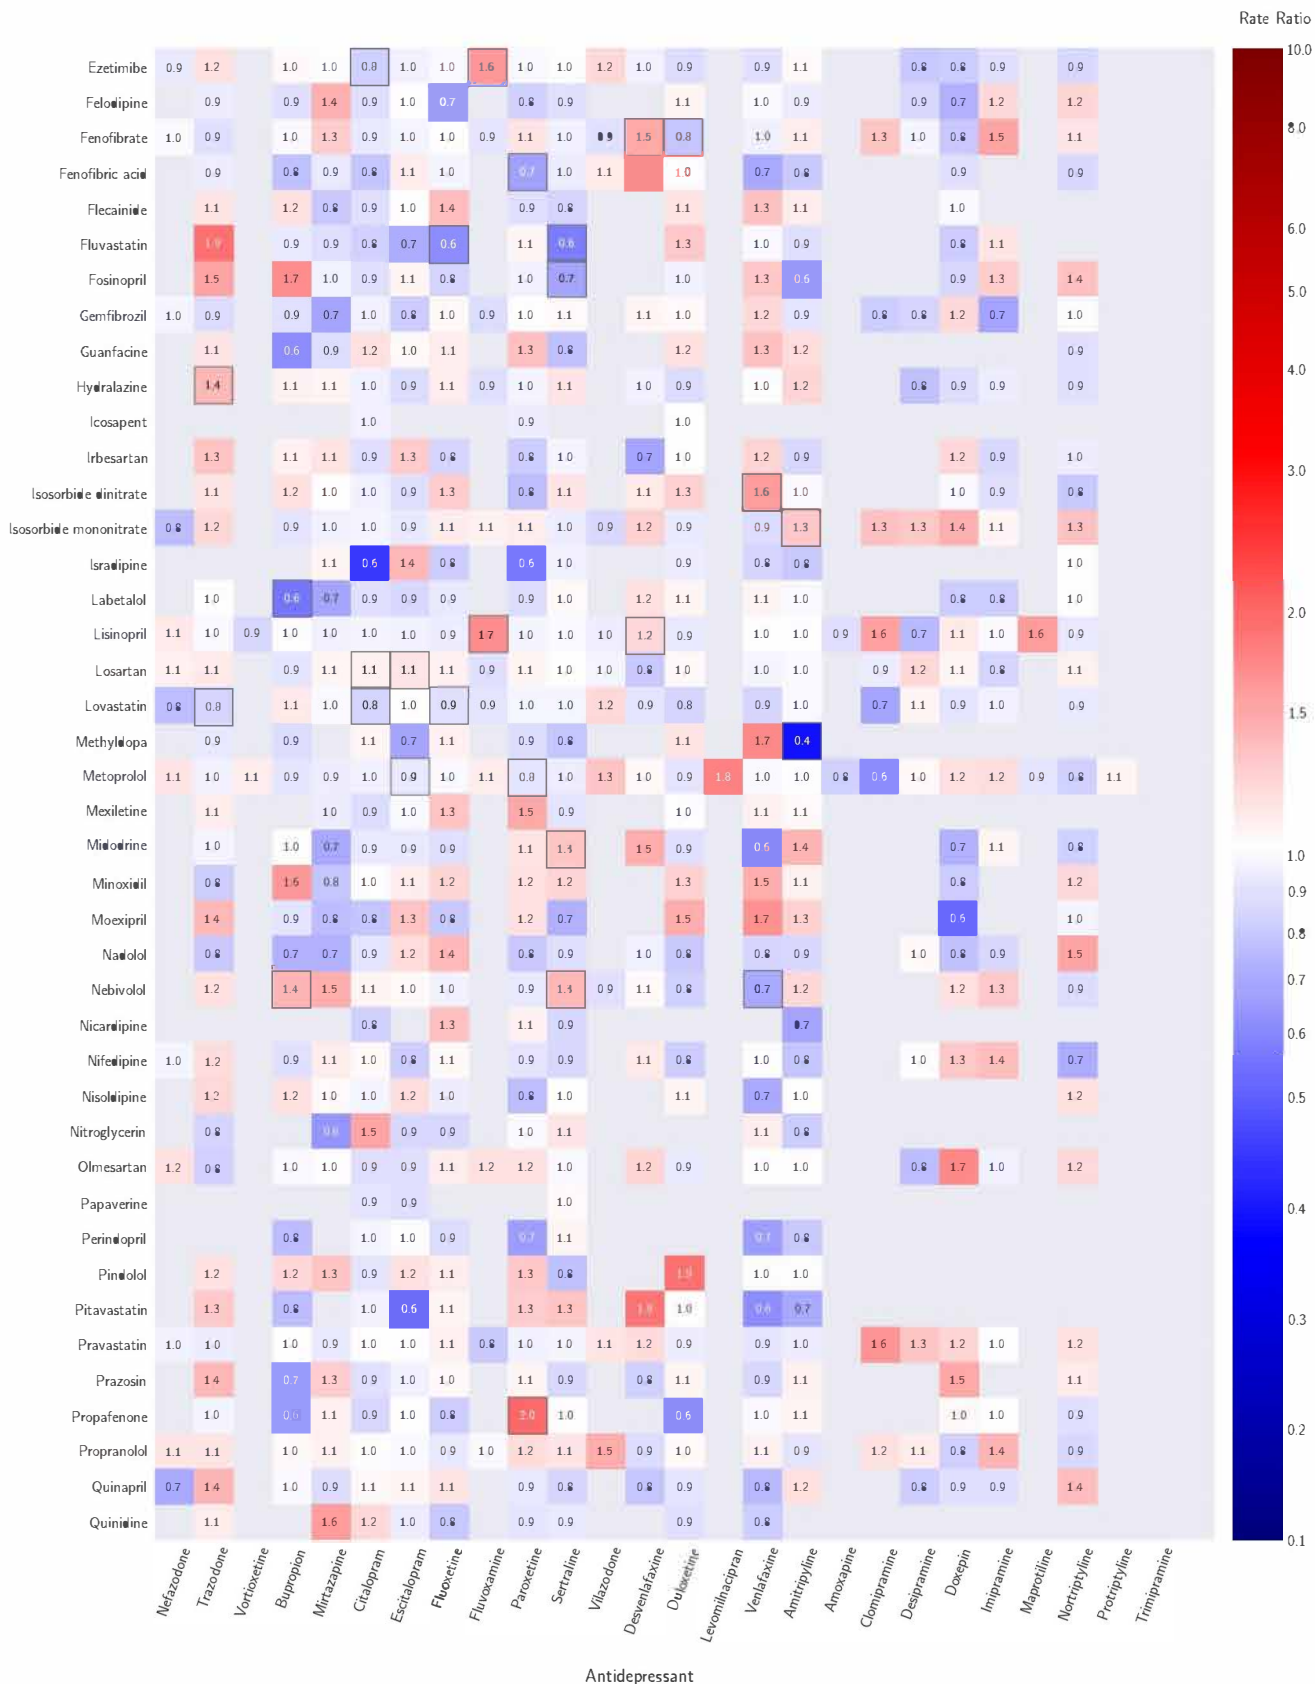



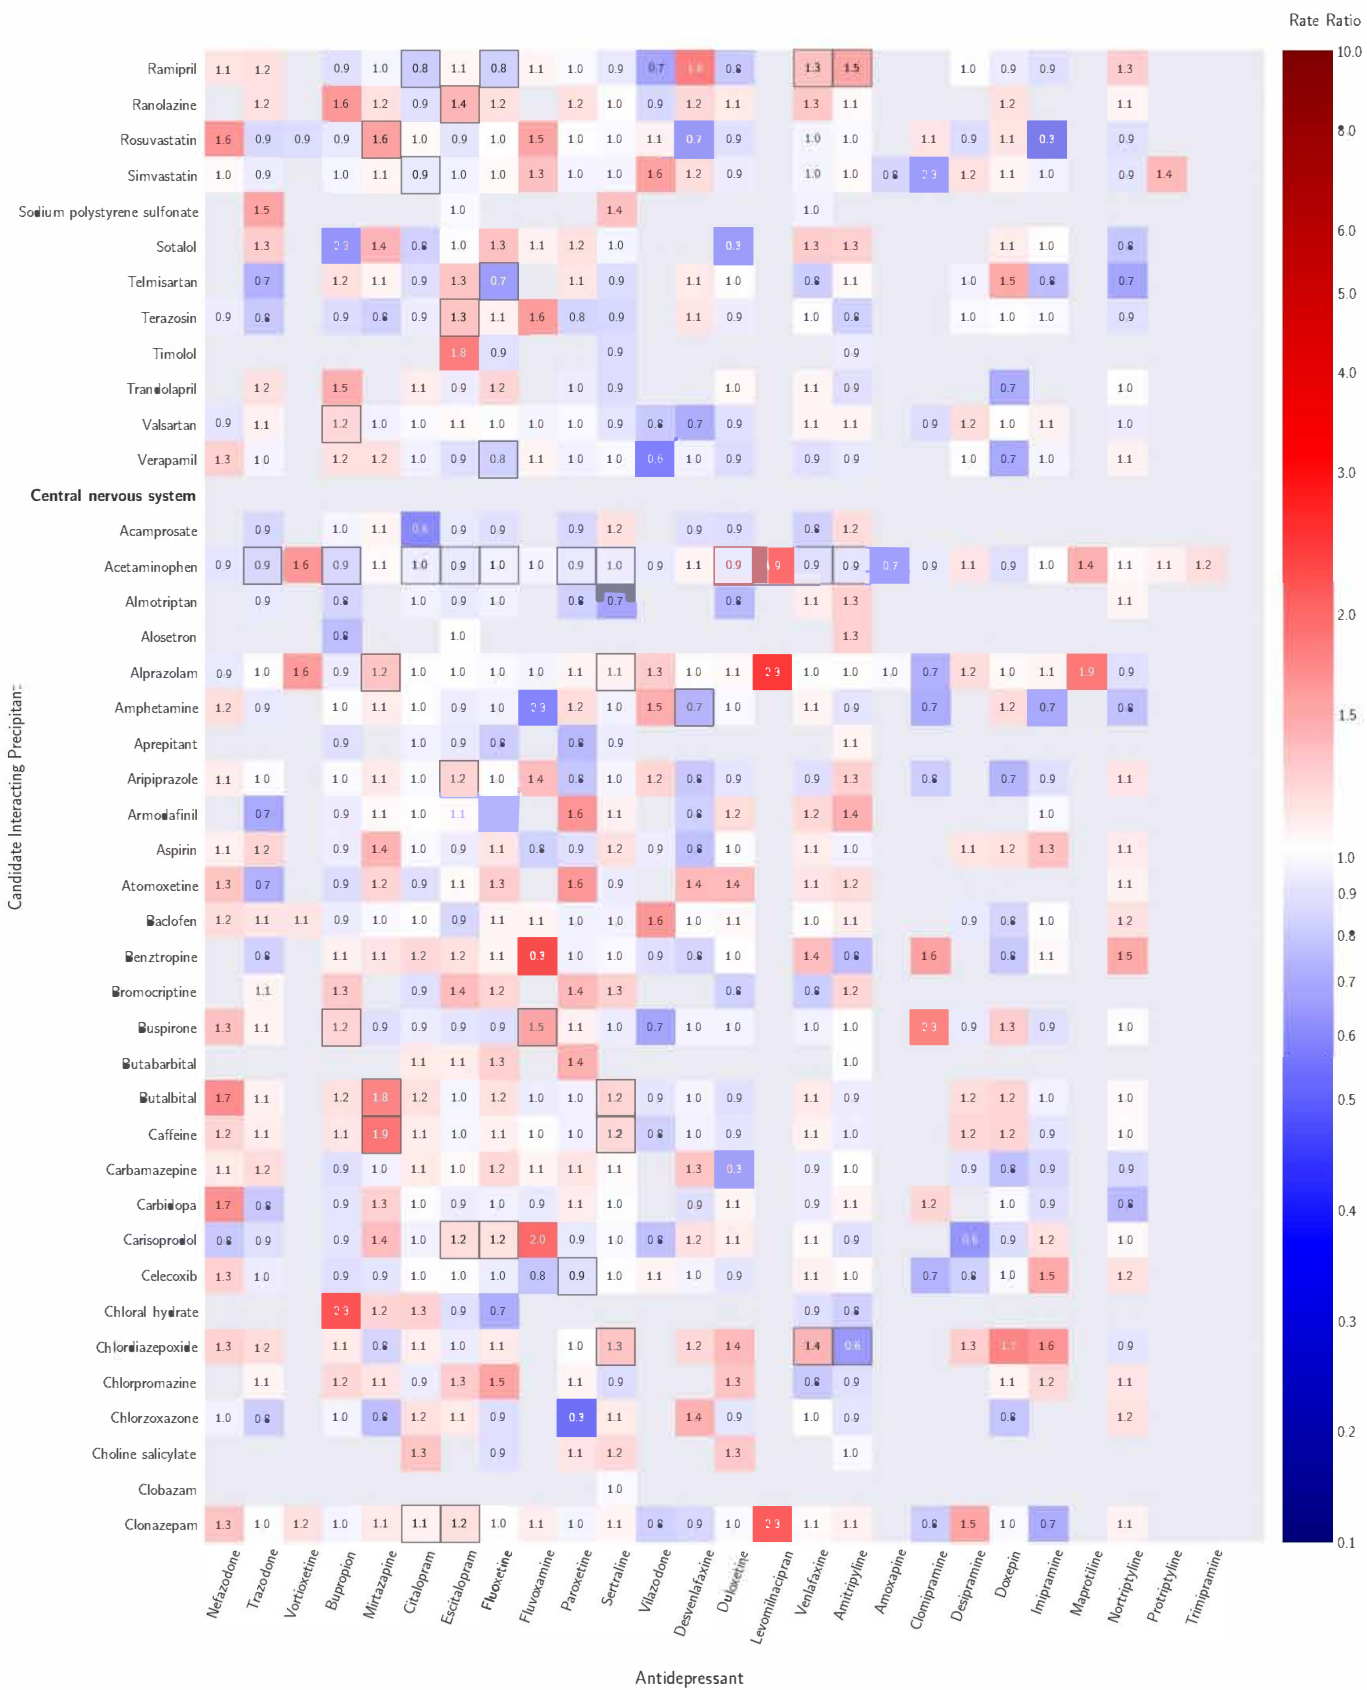

Candidate Interacting Precipitant

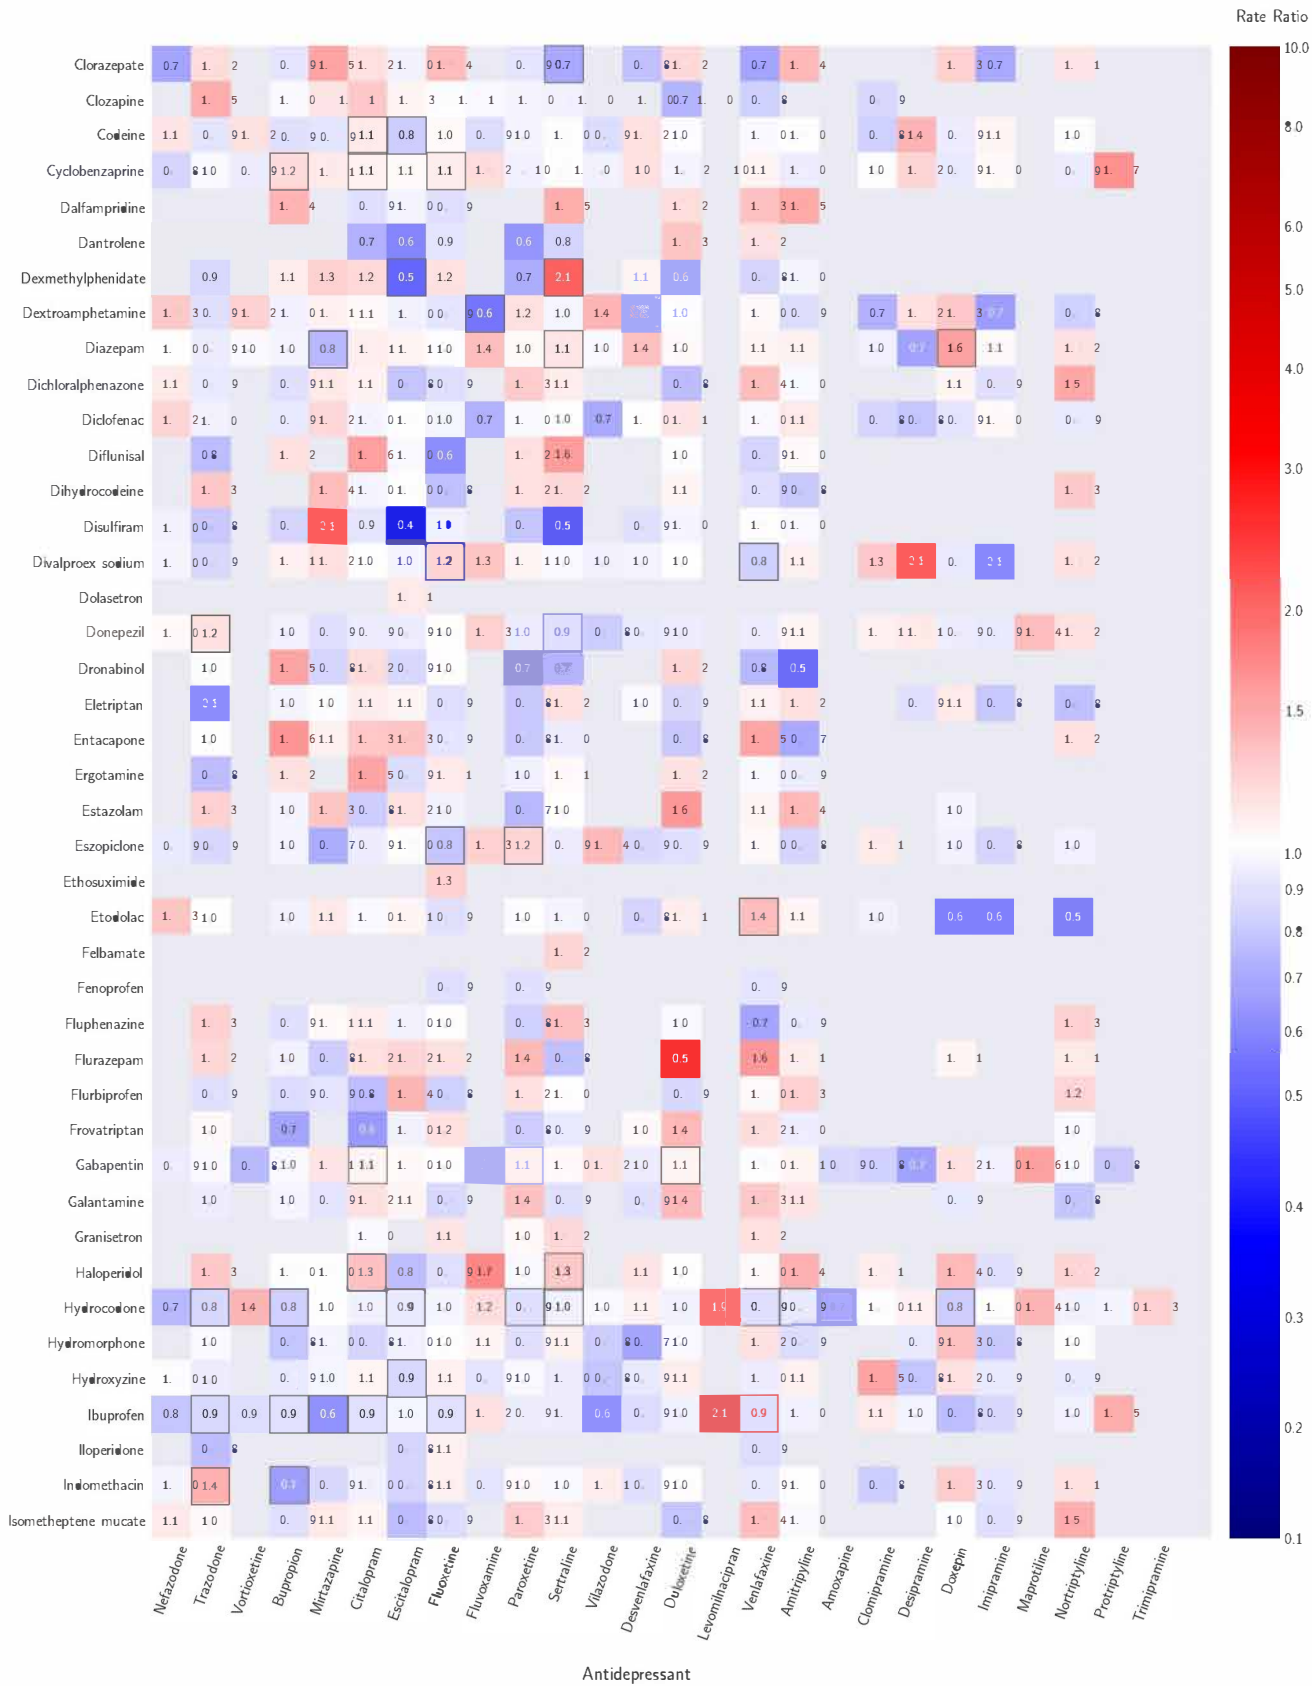

Candidate Interacting Precipitant

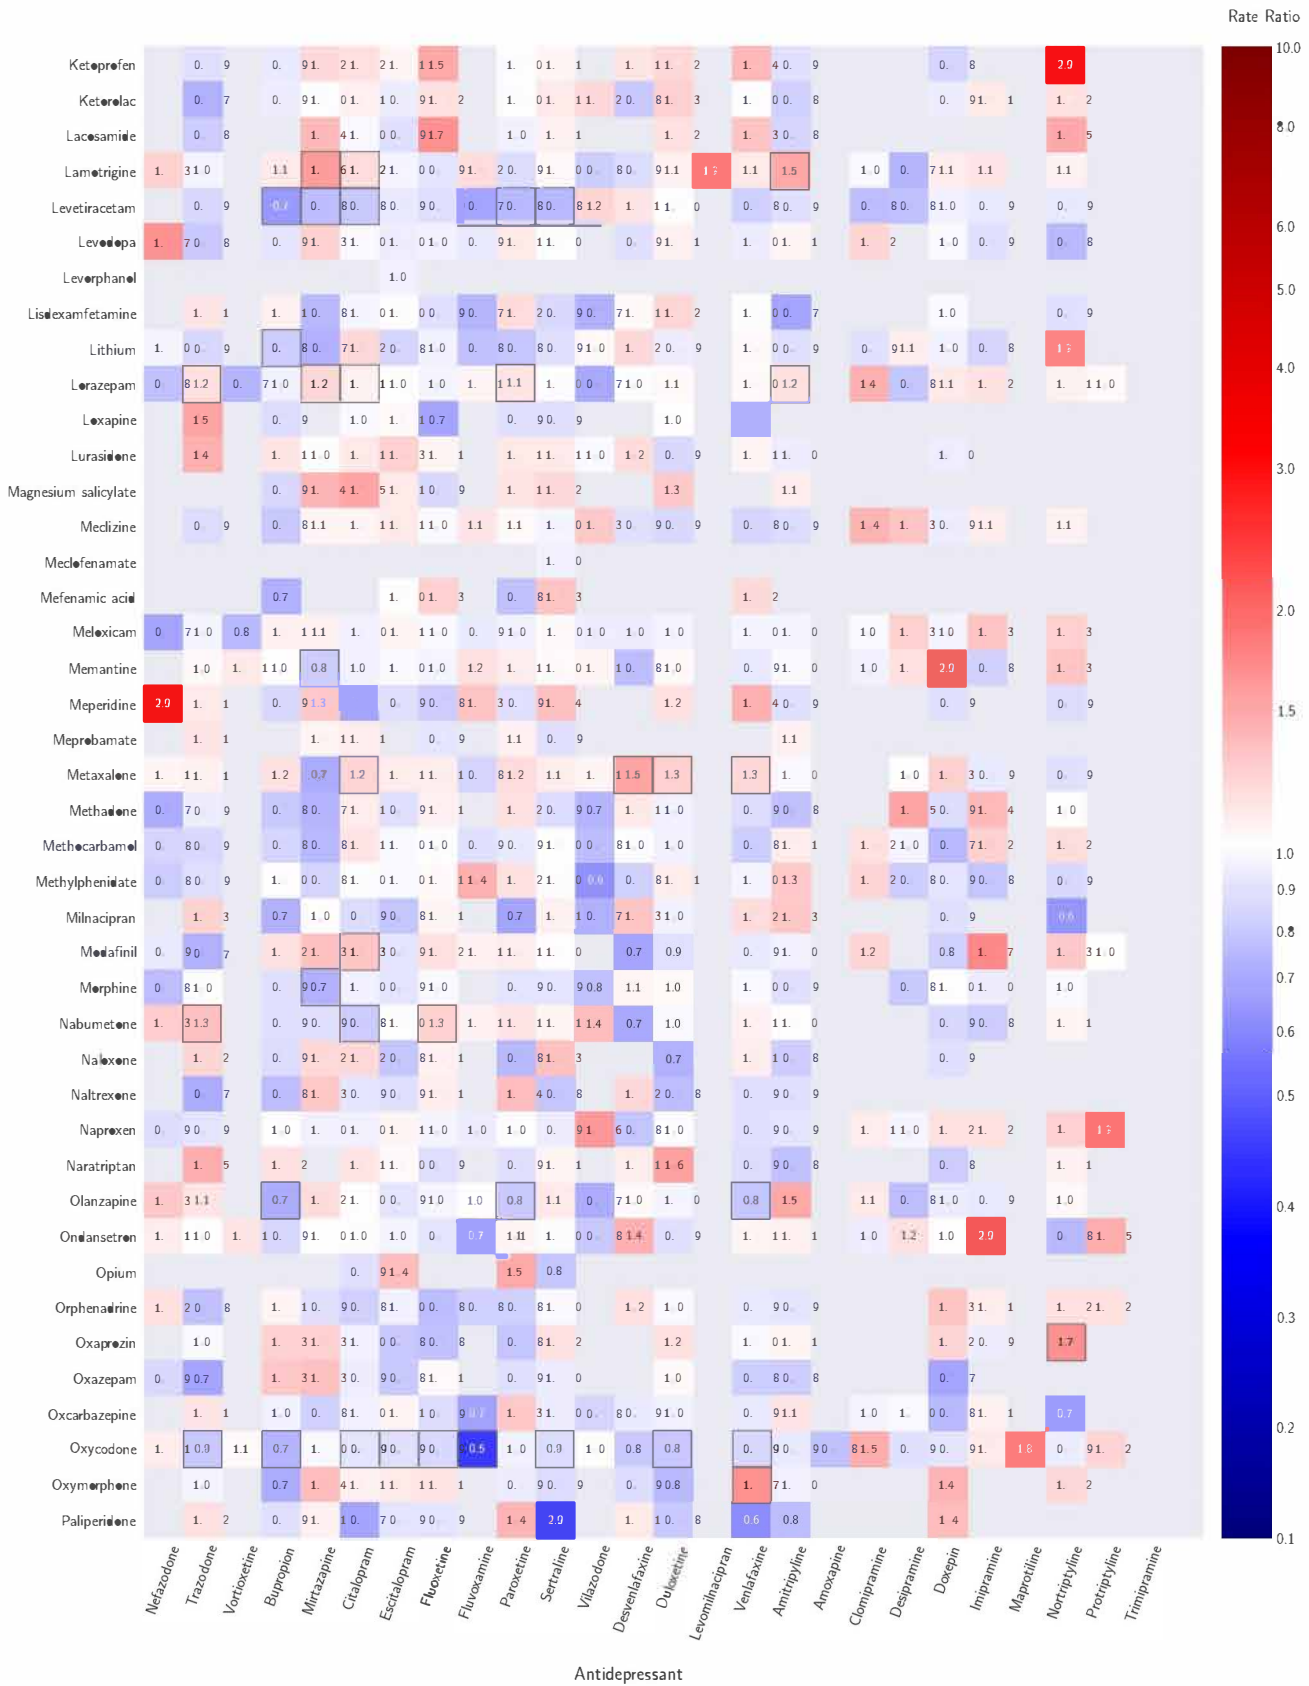

Rate Ratio

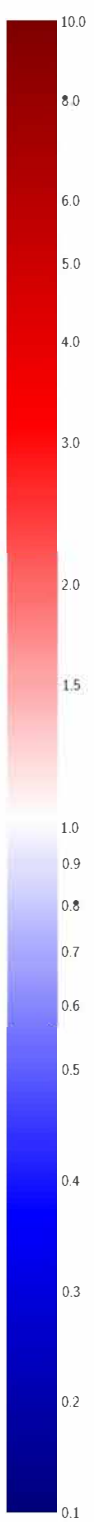



Candidate Interacting Precipitant

Rate Ratio

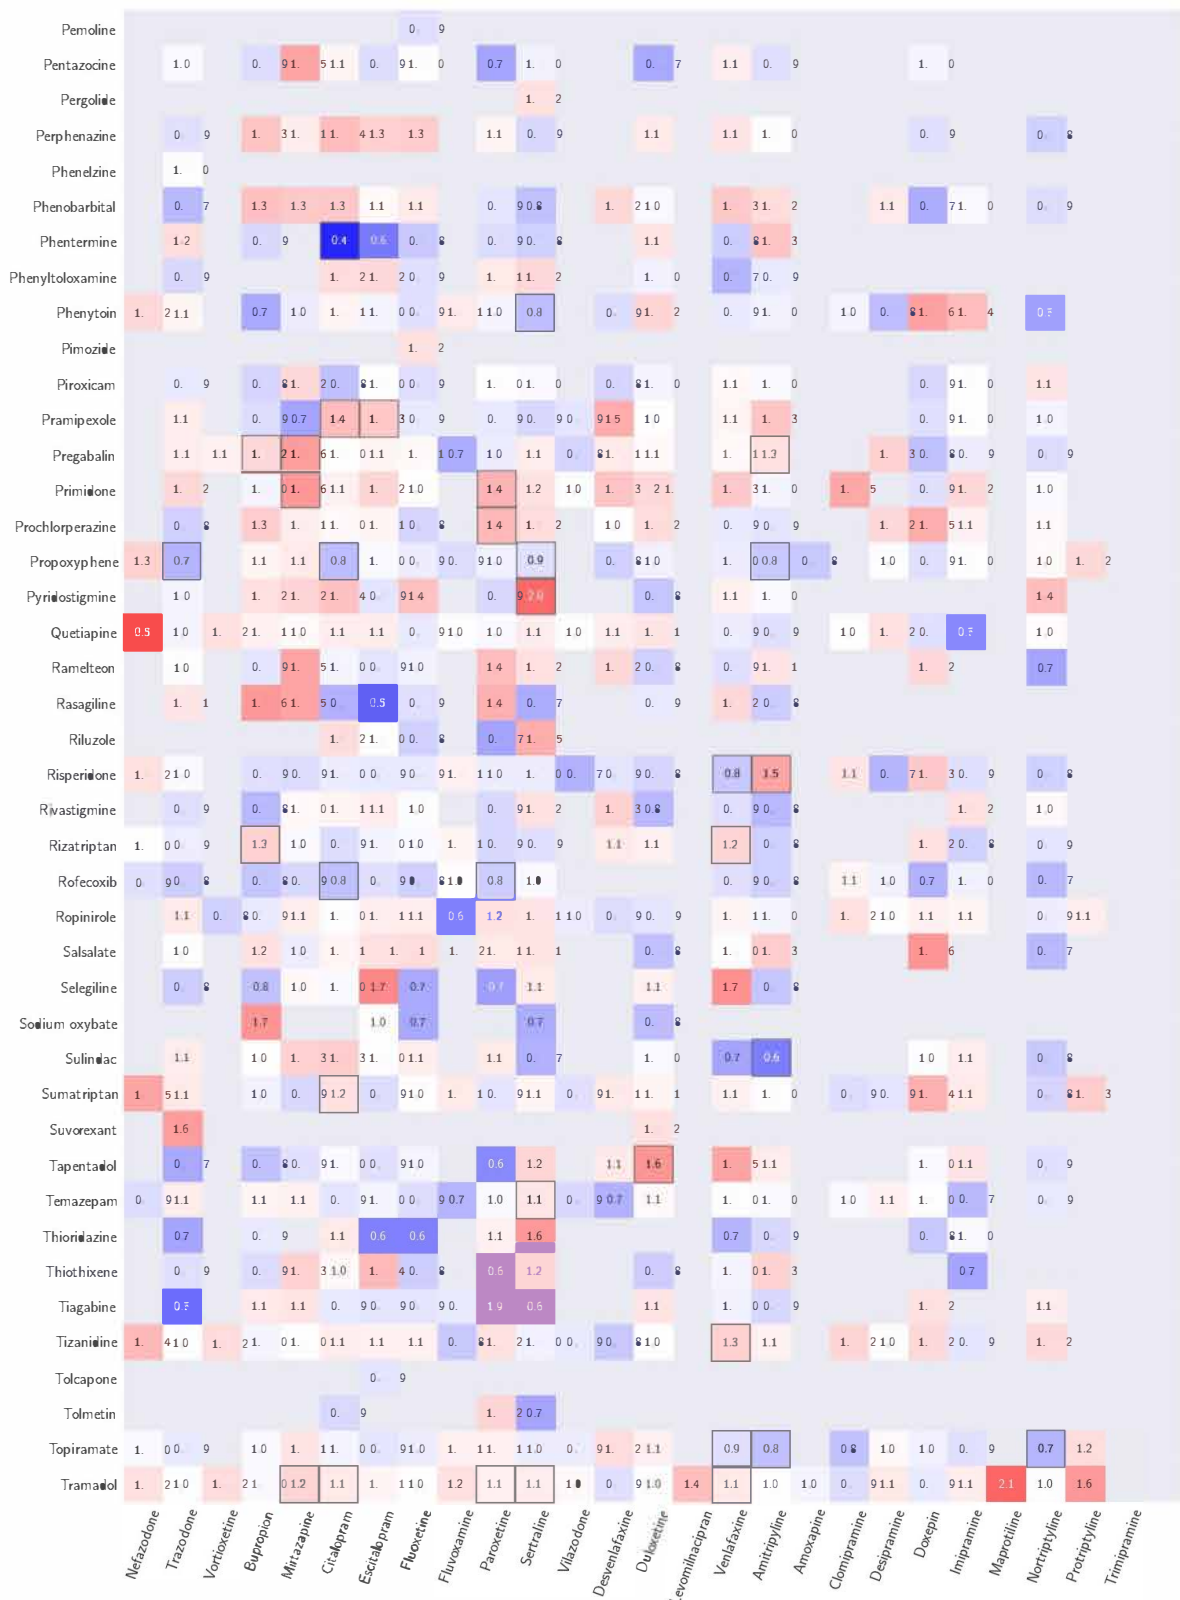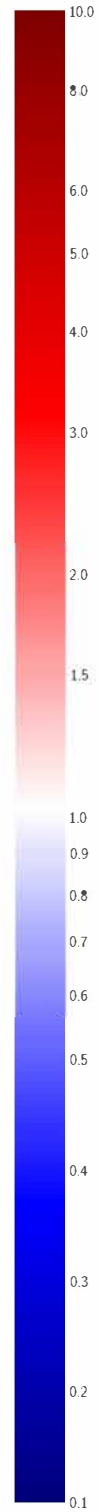

Antidepressant

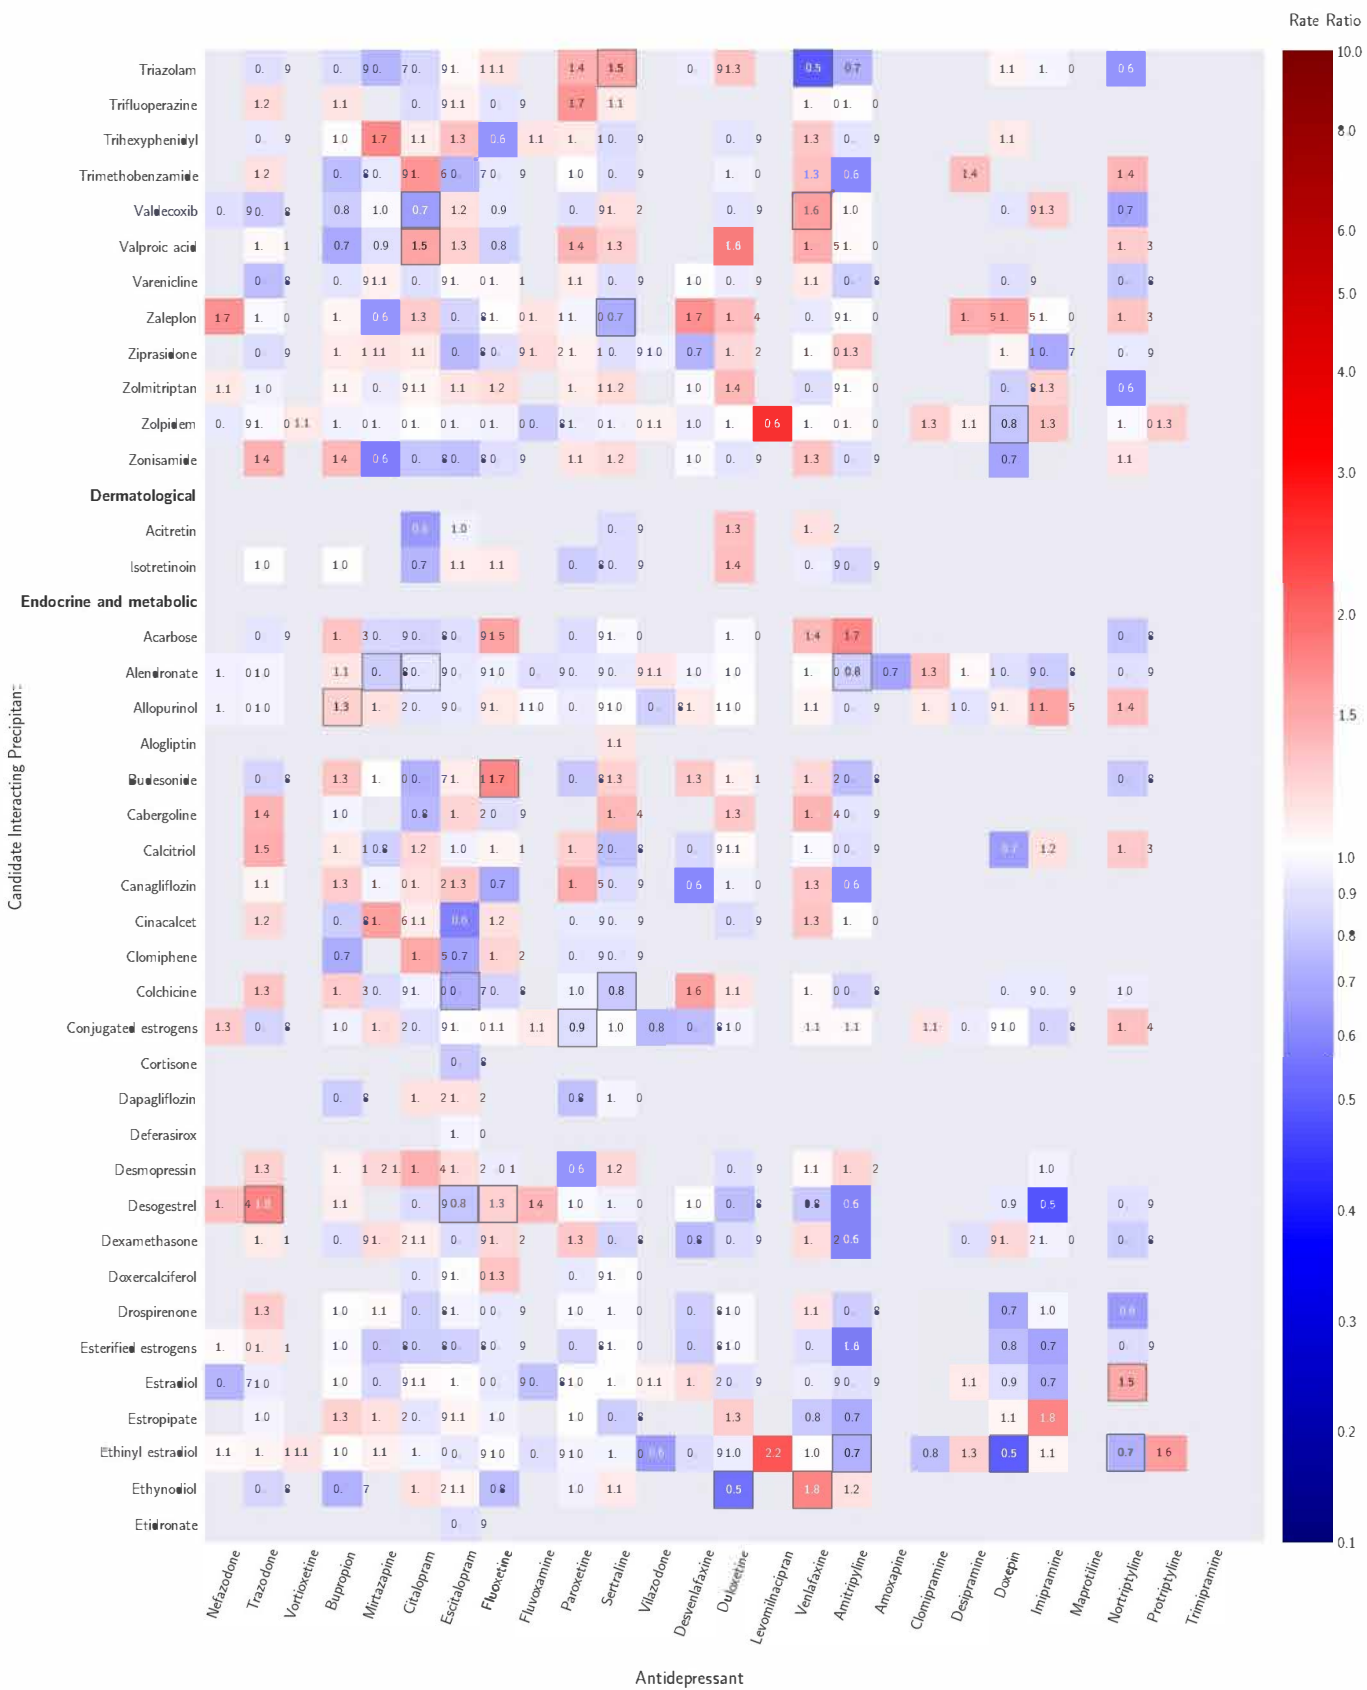

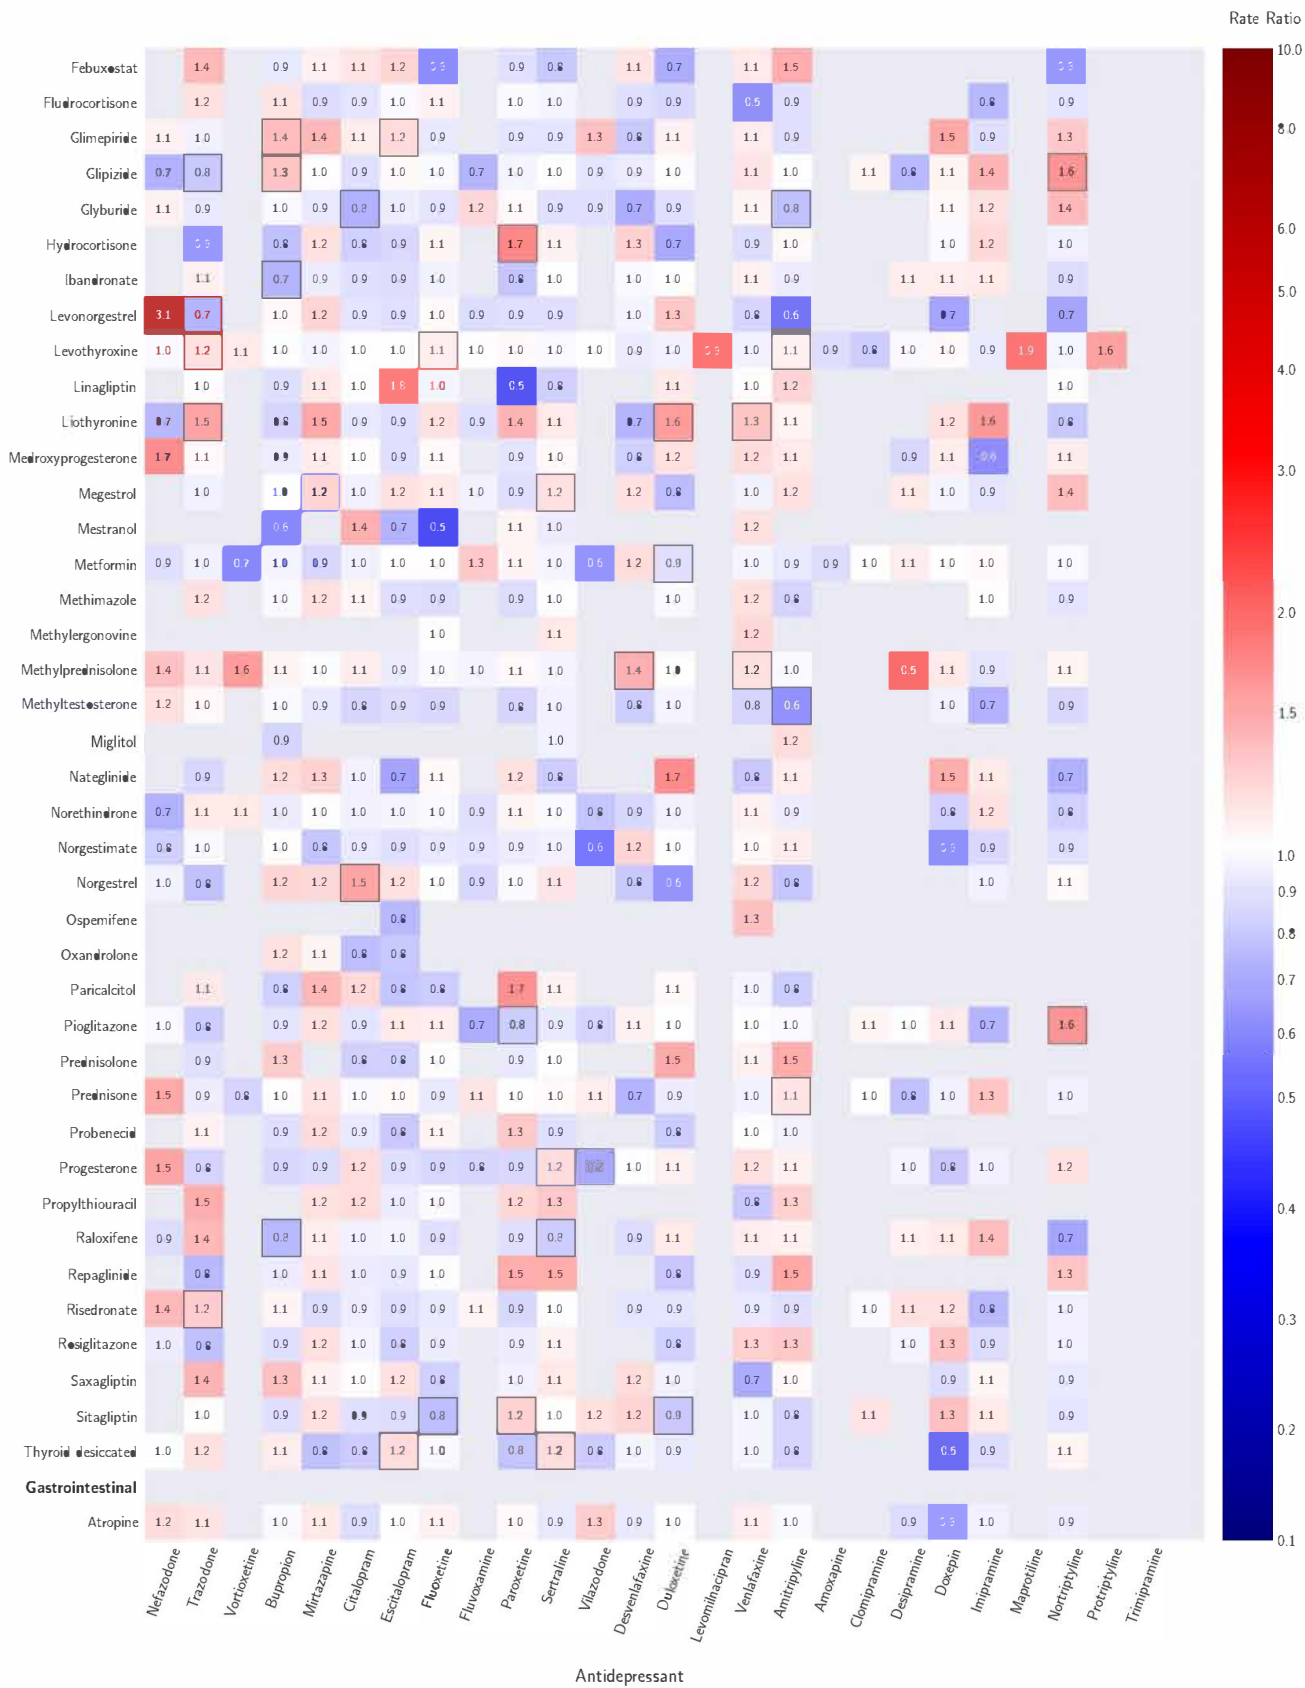

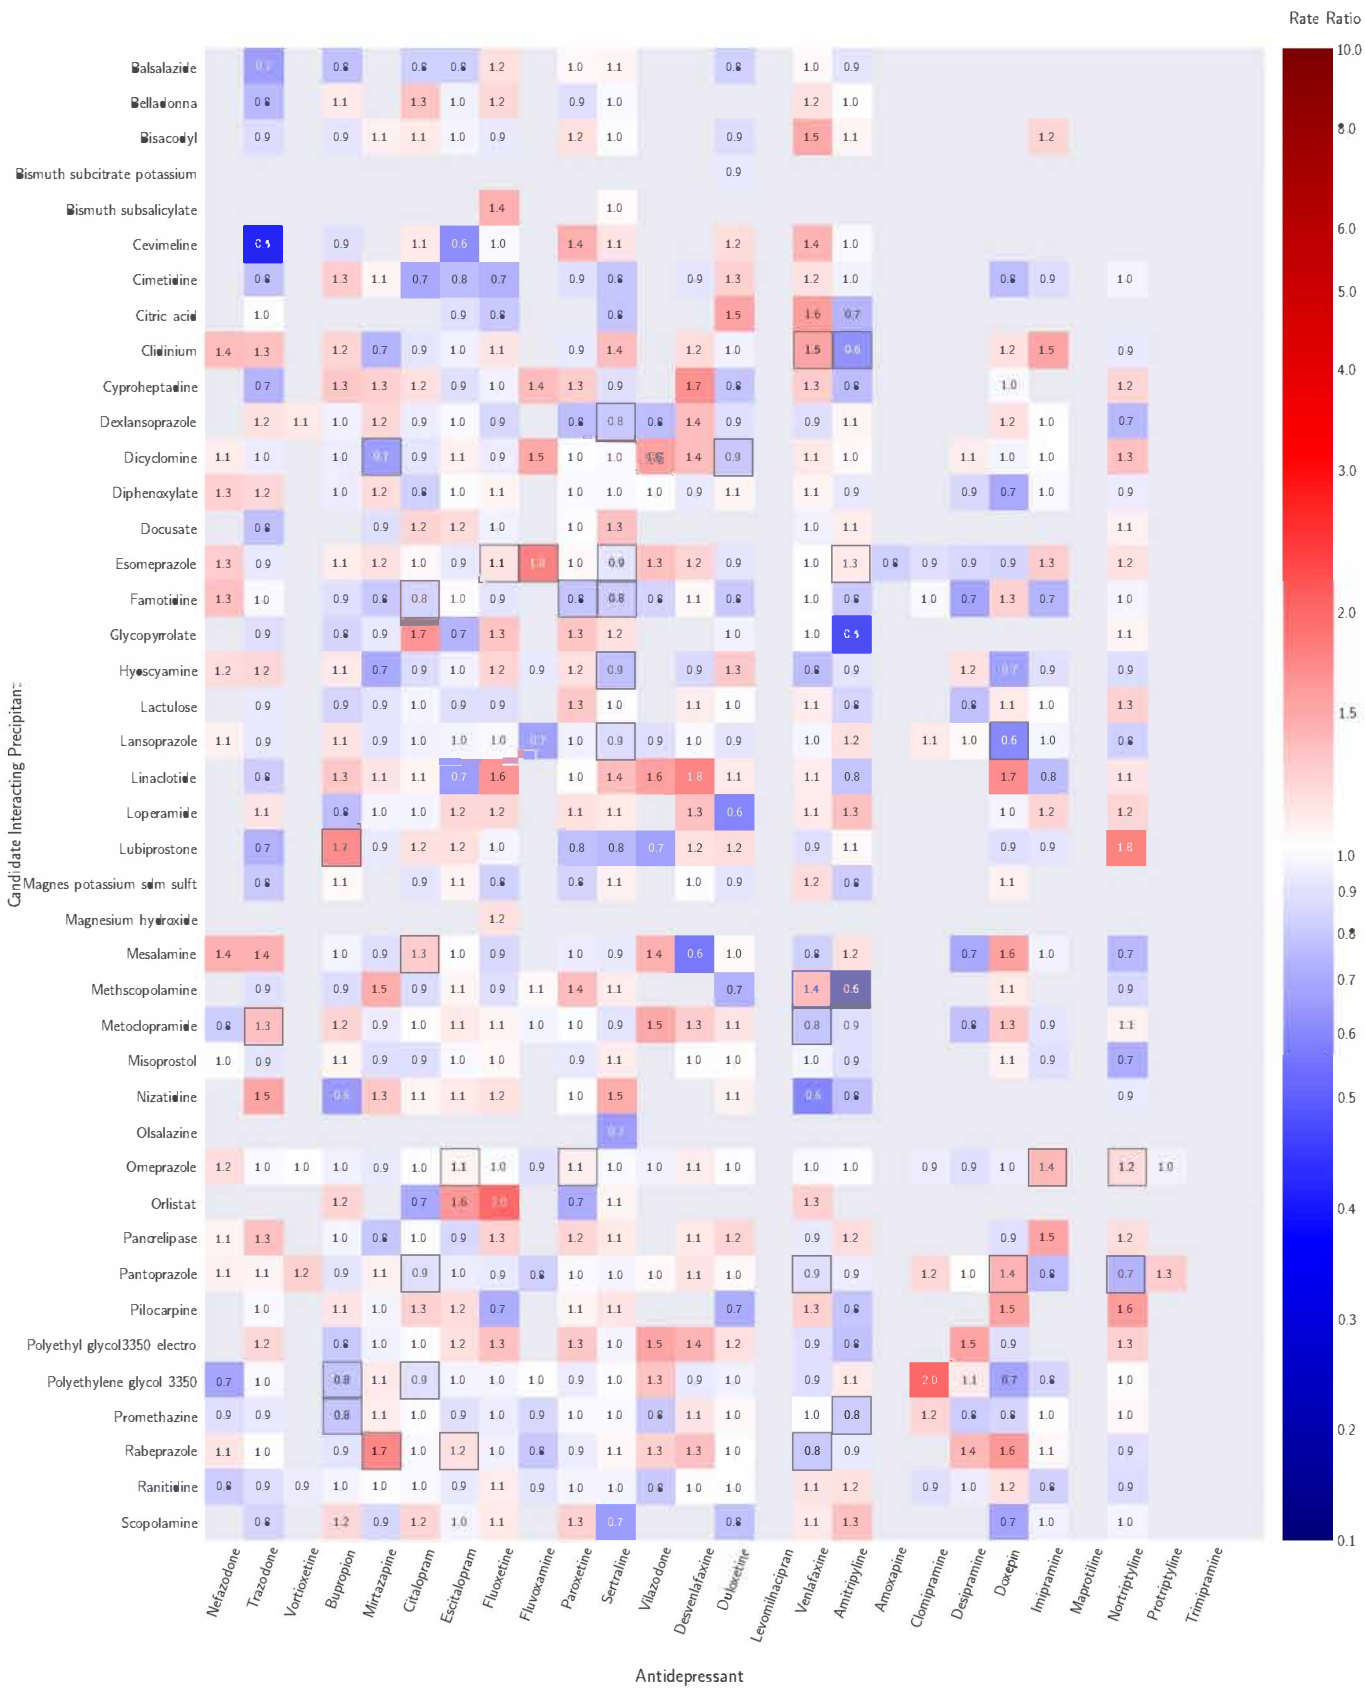



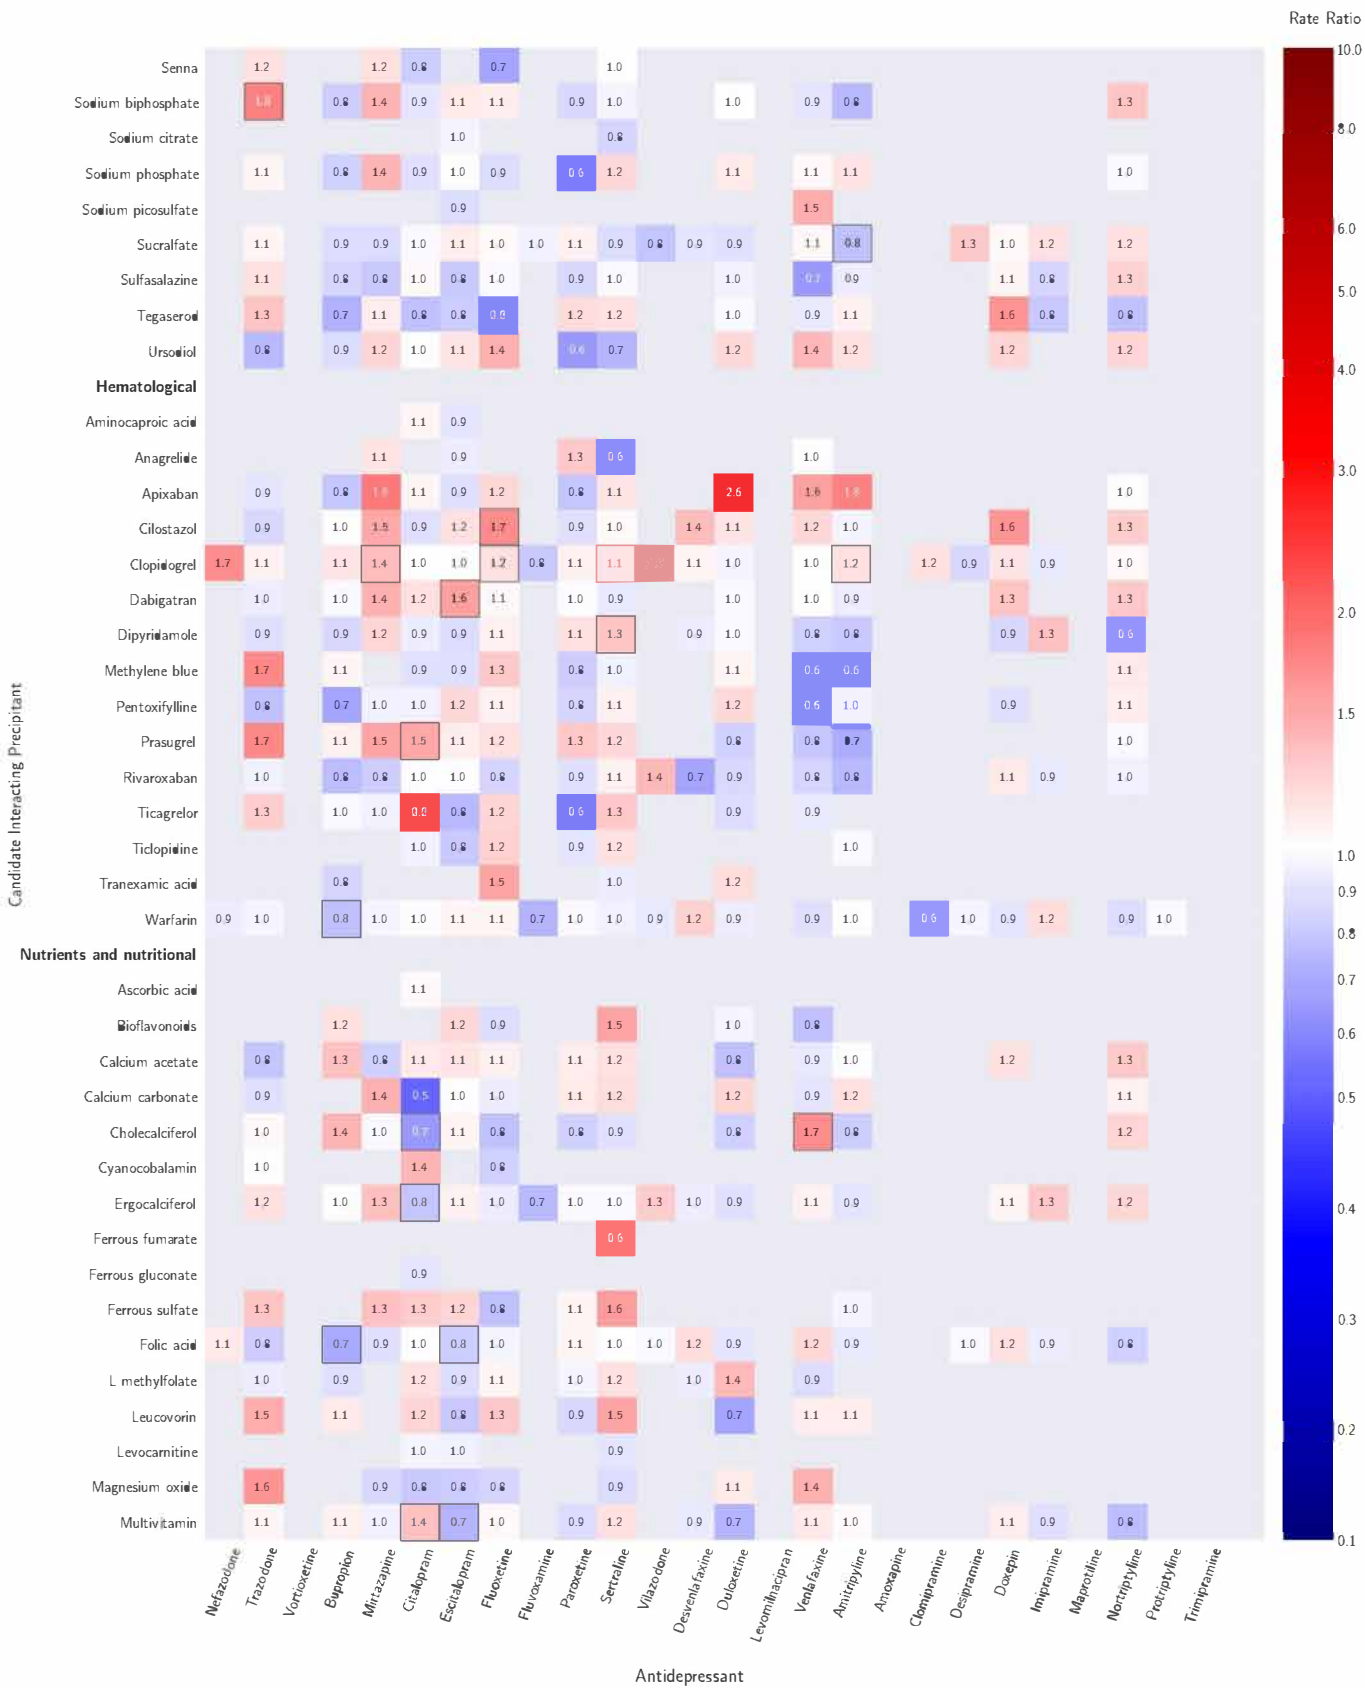

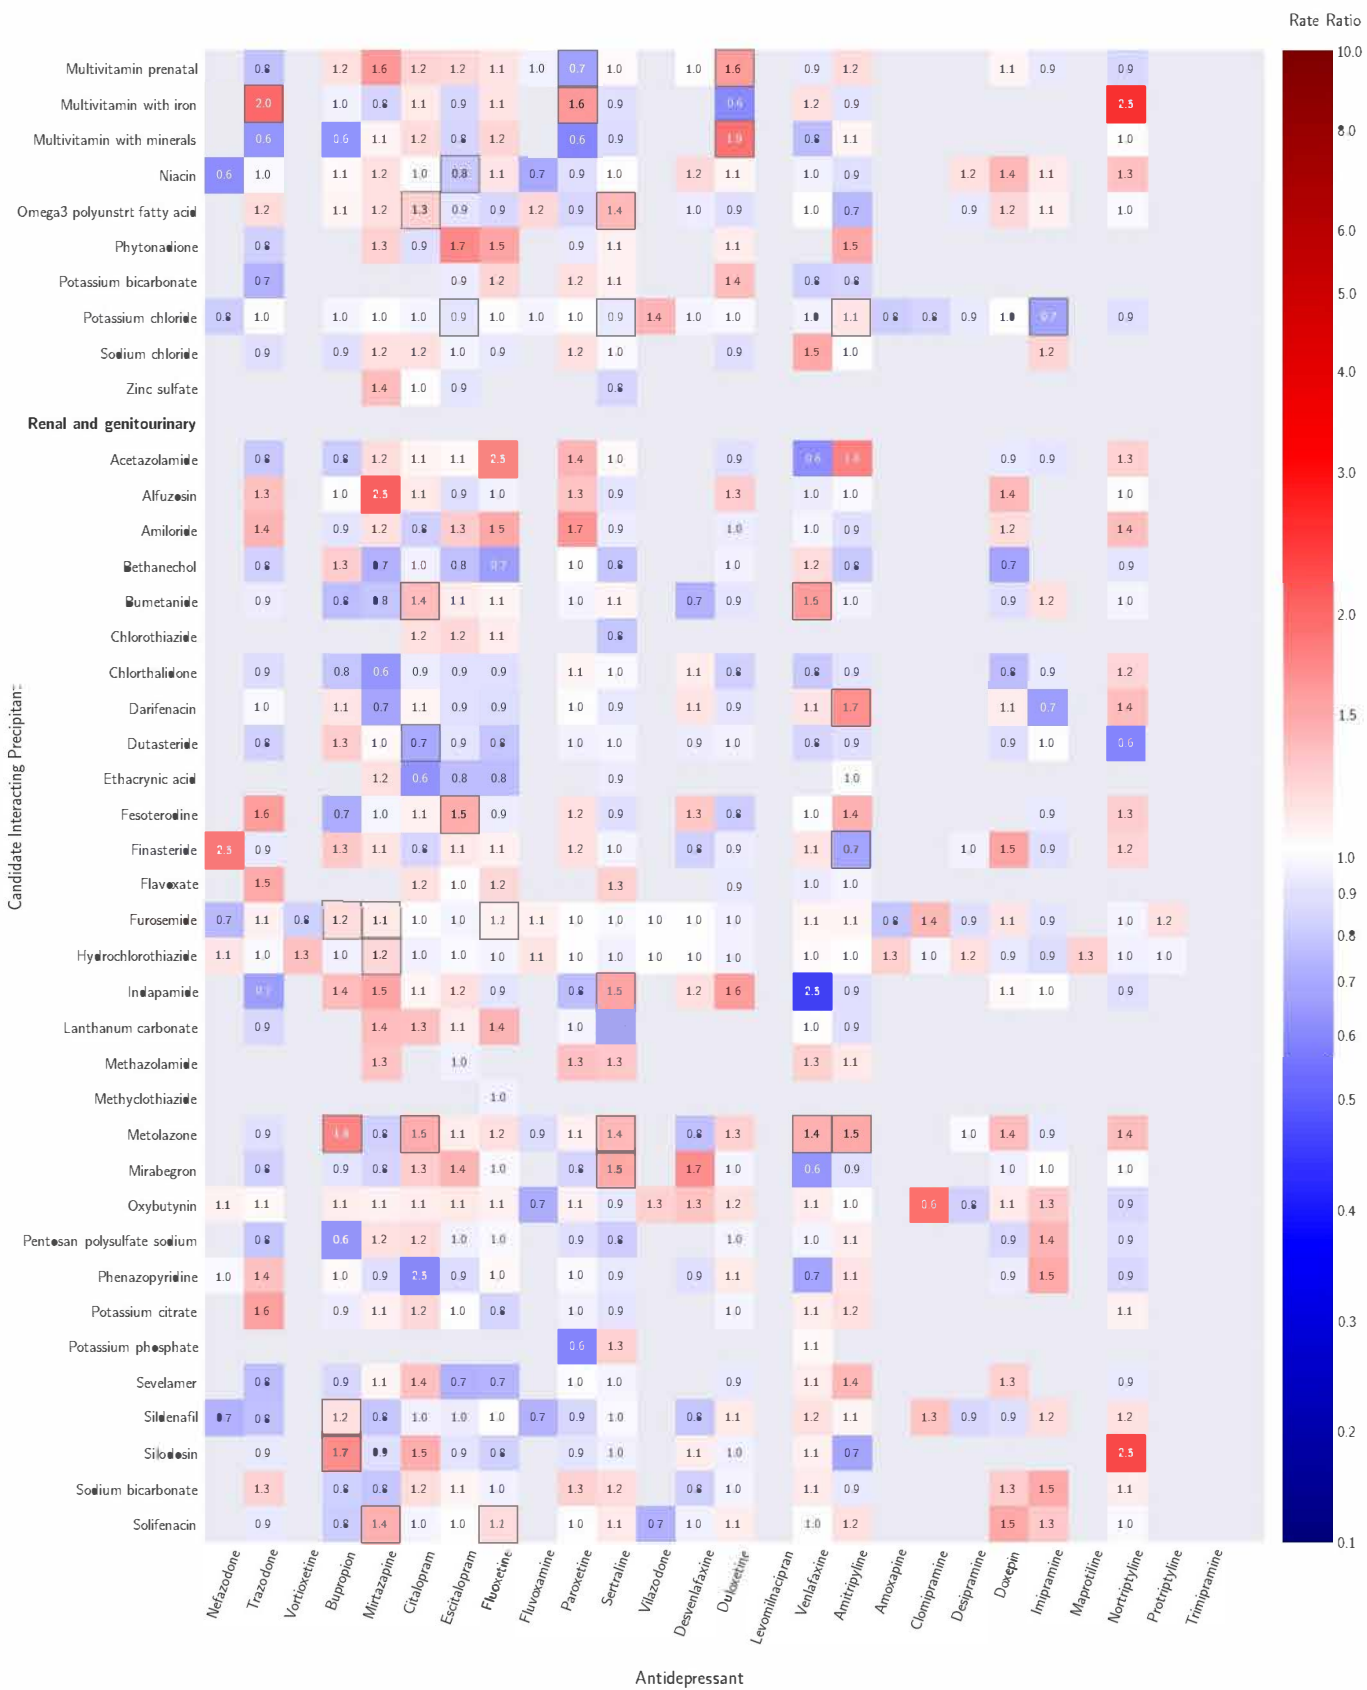

Supplement: NIHMS1674792-supplement-FIG_S1A.pdf [file NIHMS1674792-supplement-FIG_S1A.pdf]
