# Supplementary material
Source: PubMed Central journal article supplement (PMC8316258)

Supplemental Figure 1, Panel C. Heatmap depicting semi-Bayes shrunk adjusted rate ratios for motor vehicle crash, by antidepressant object drug cohort.

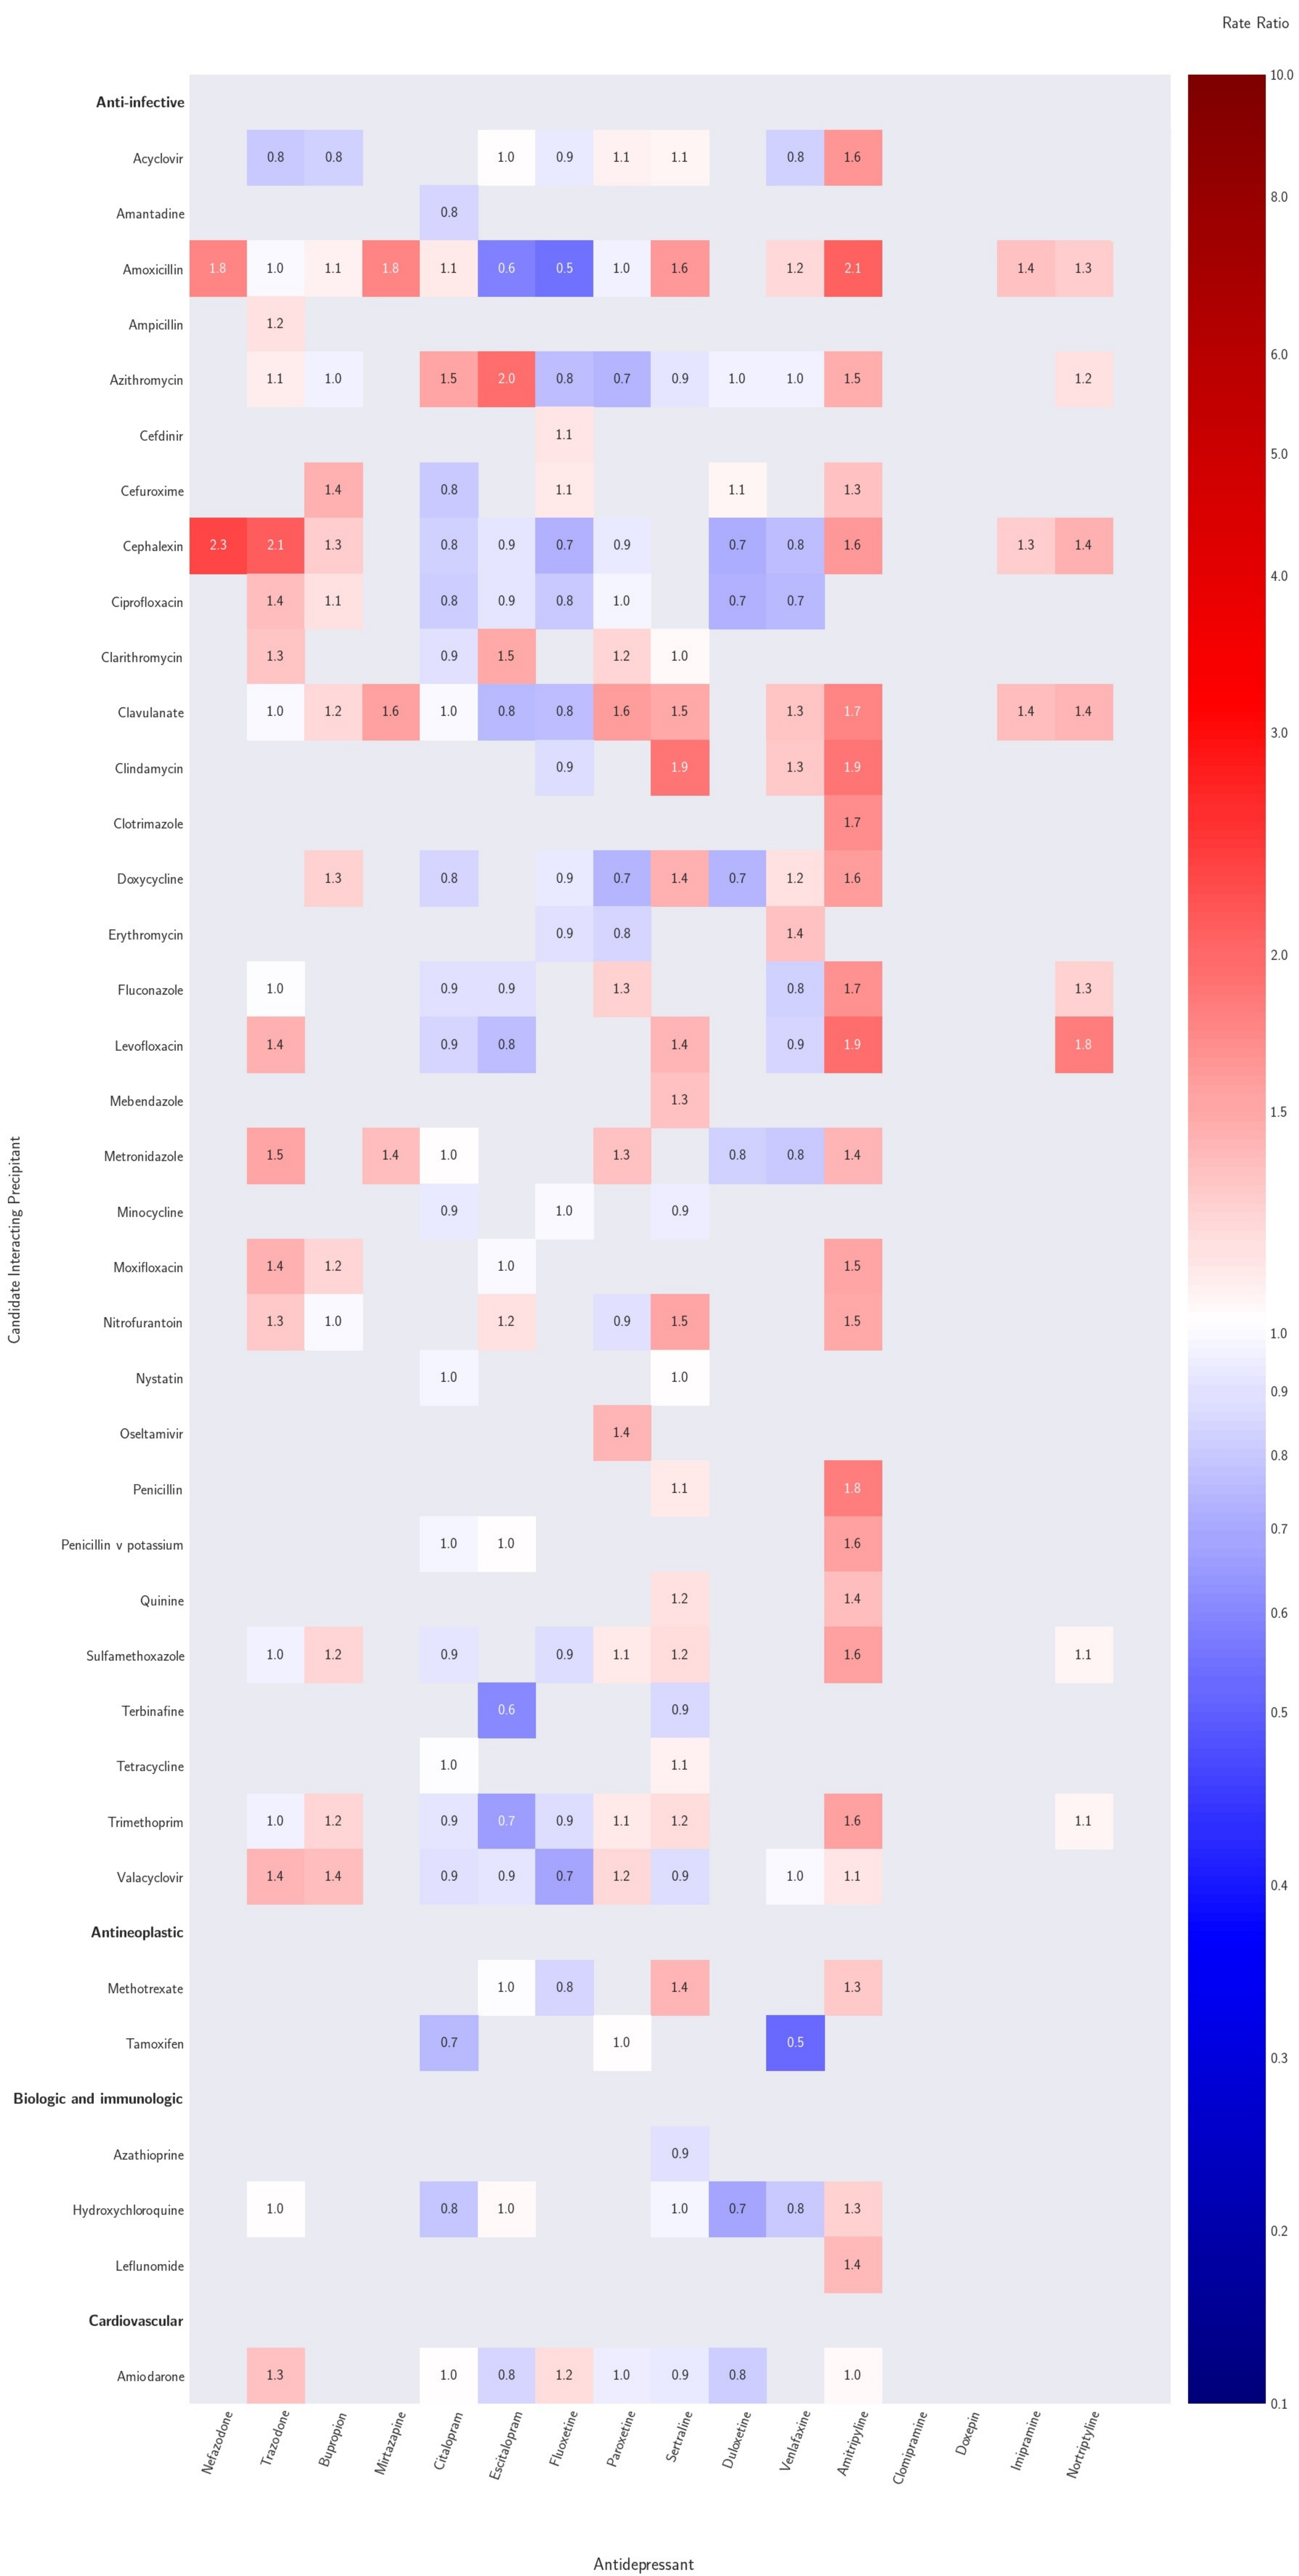



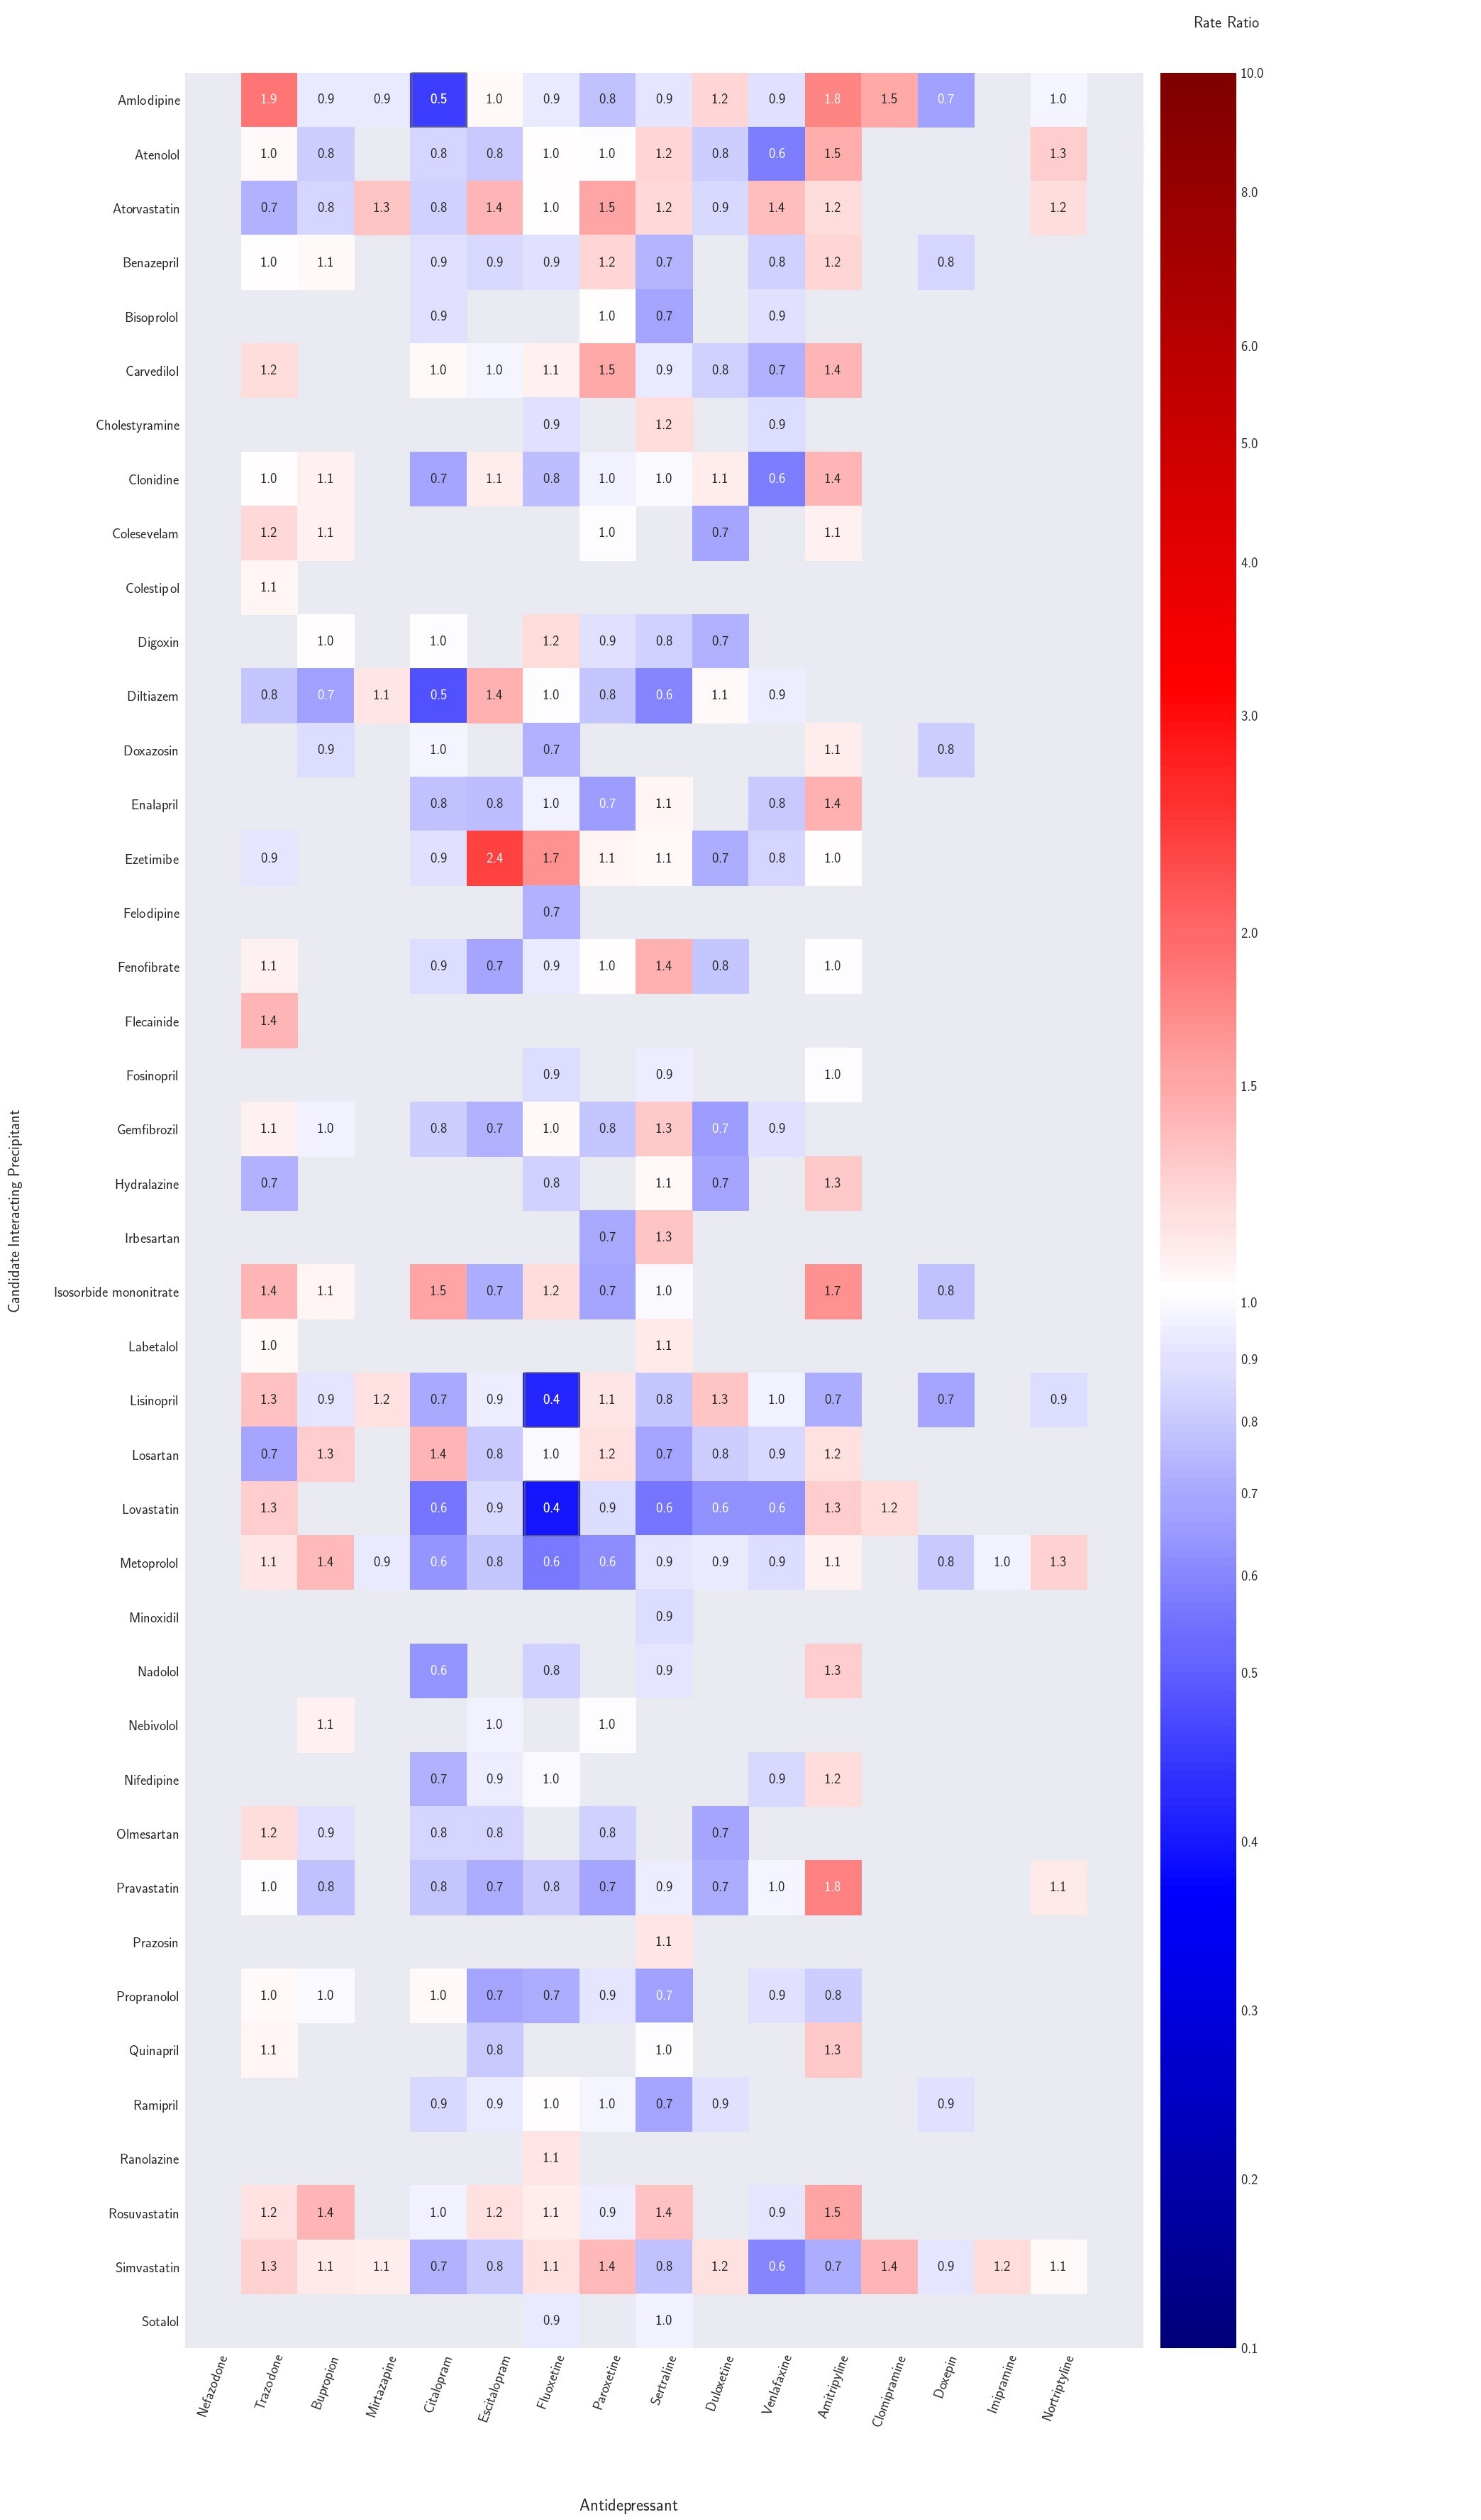



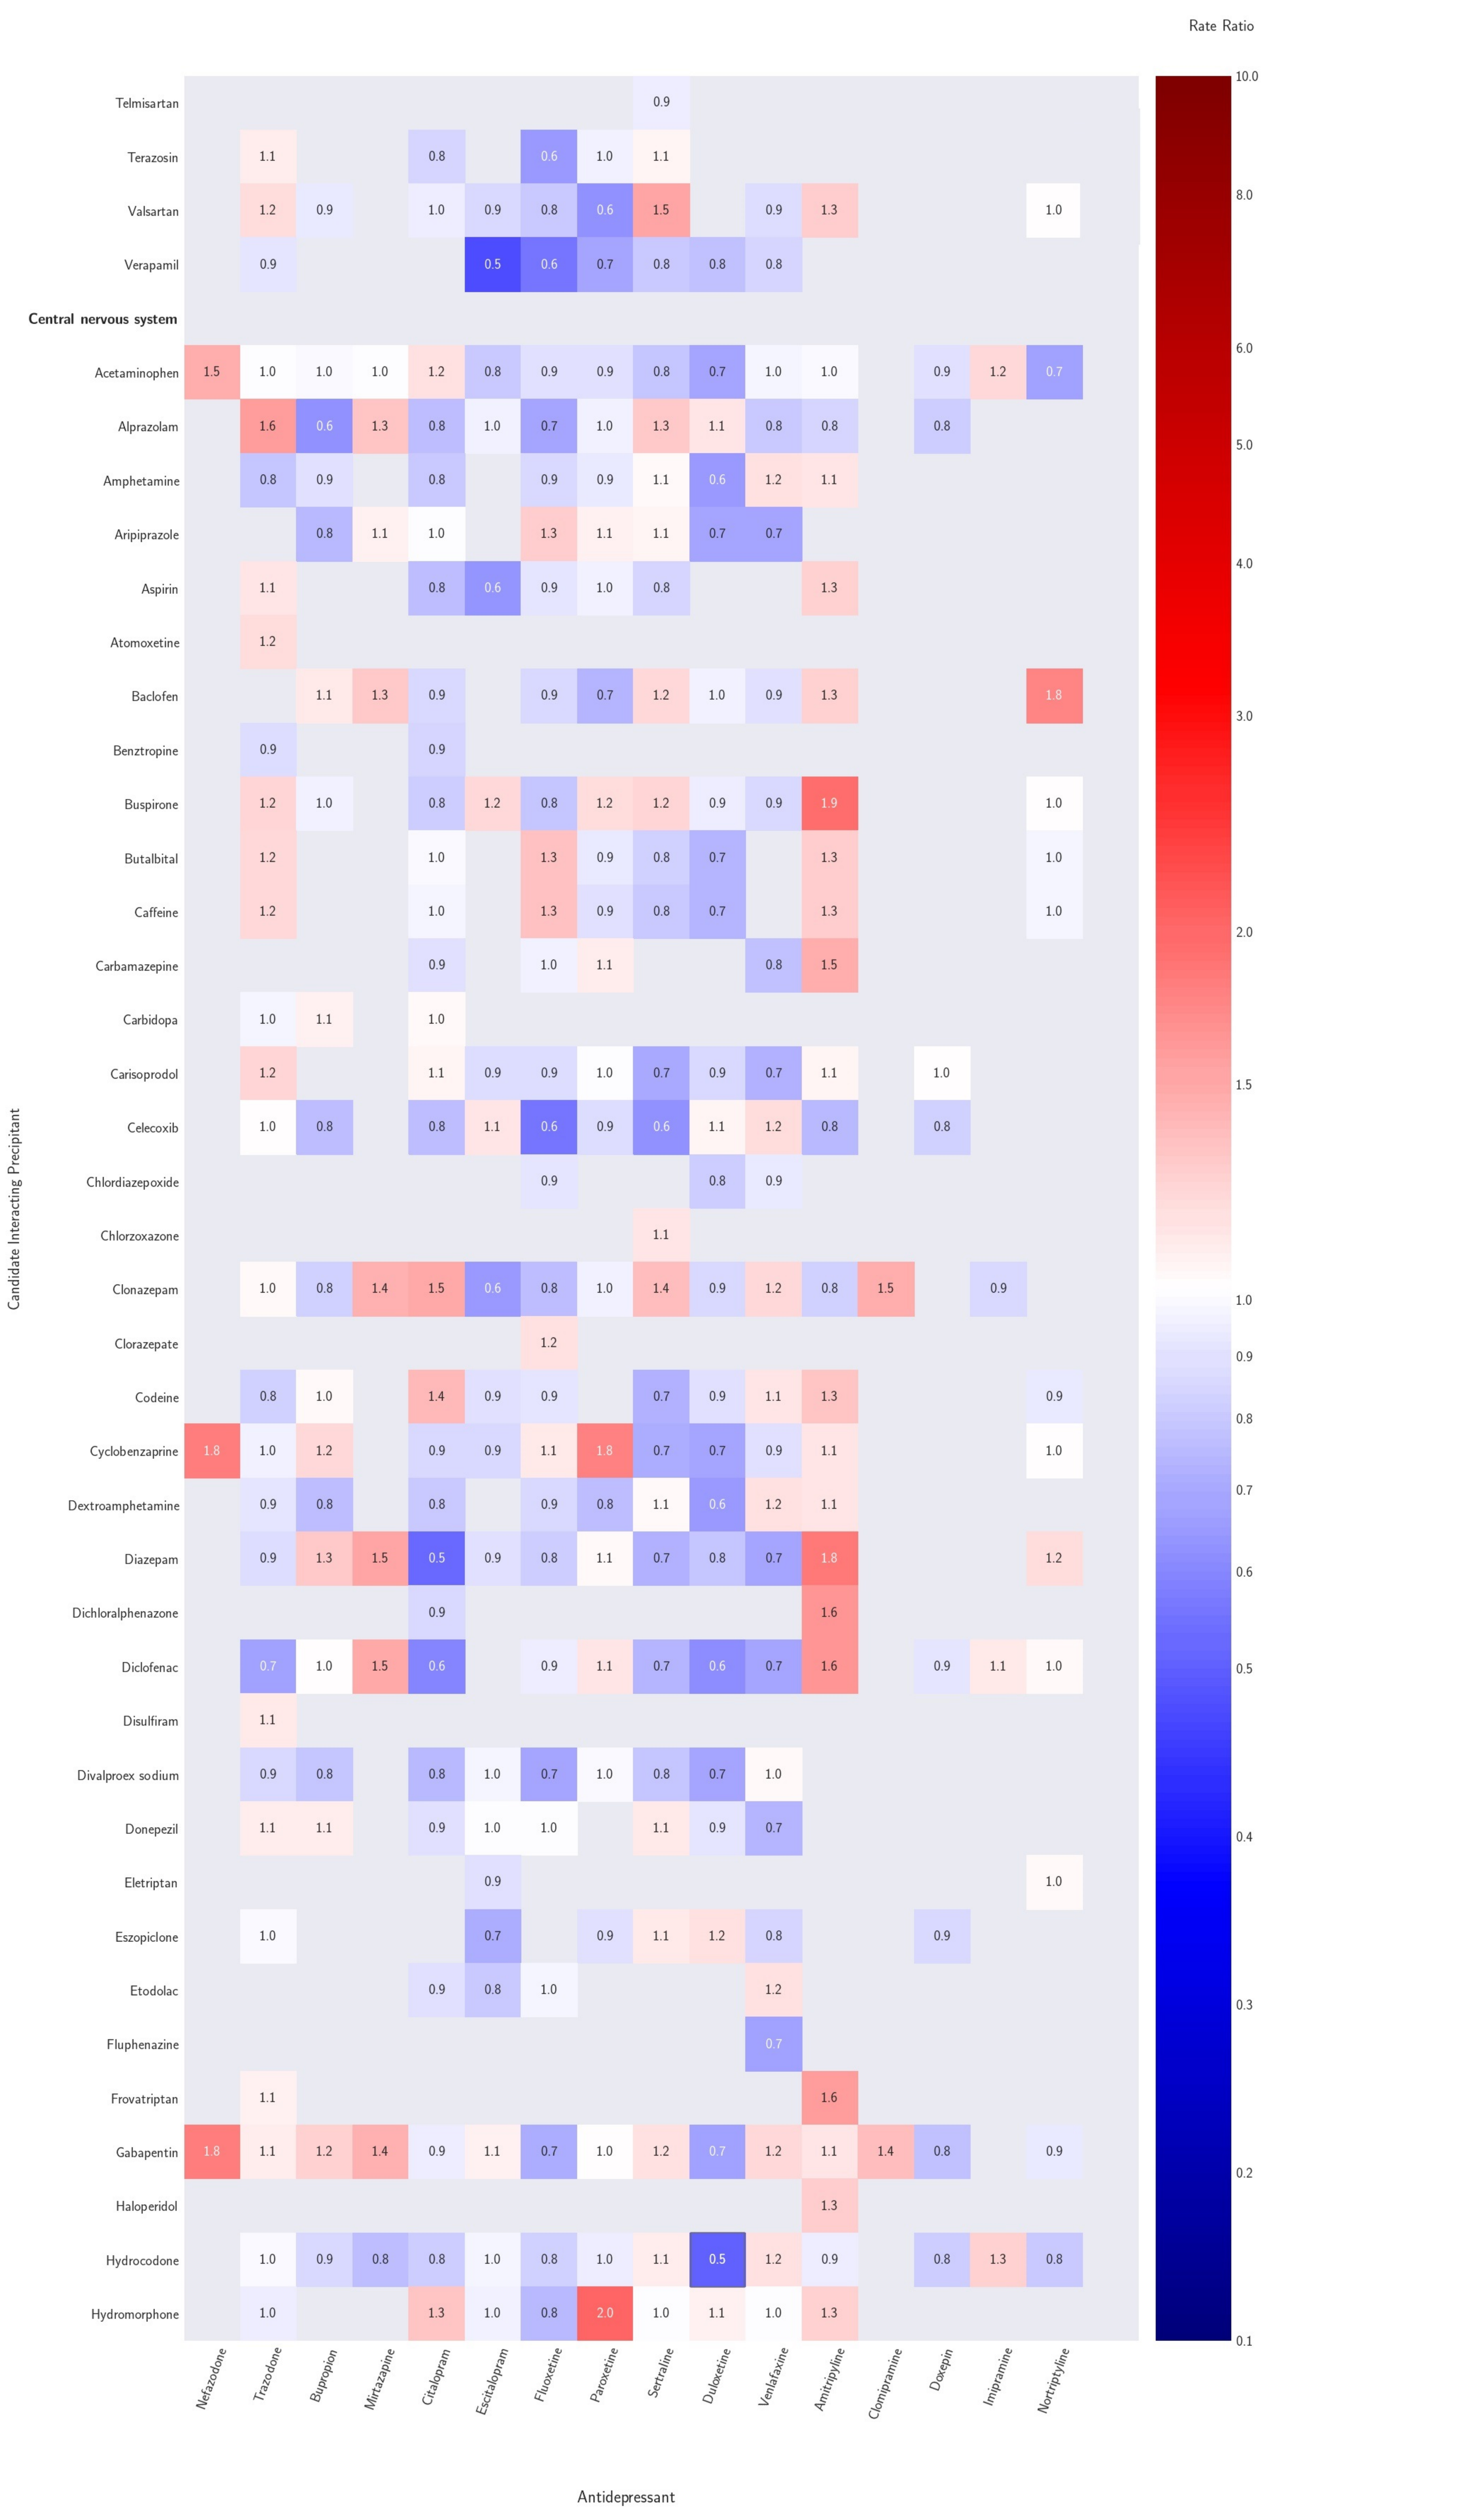



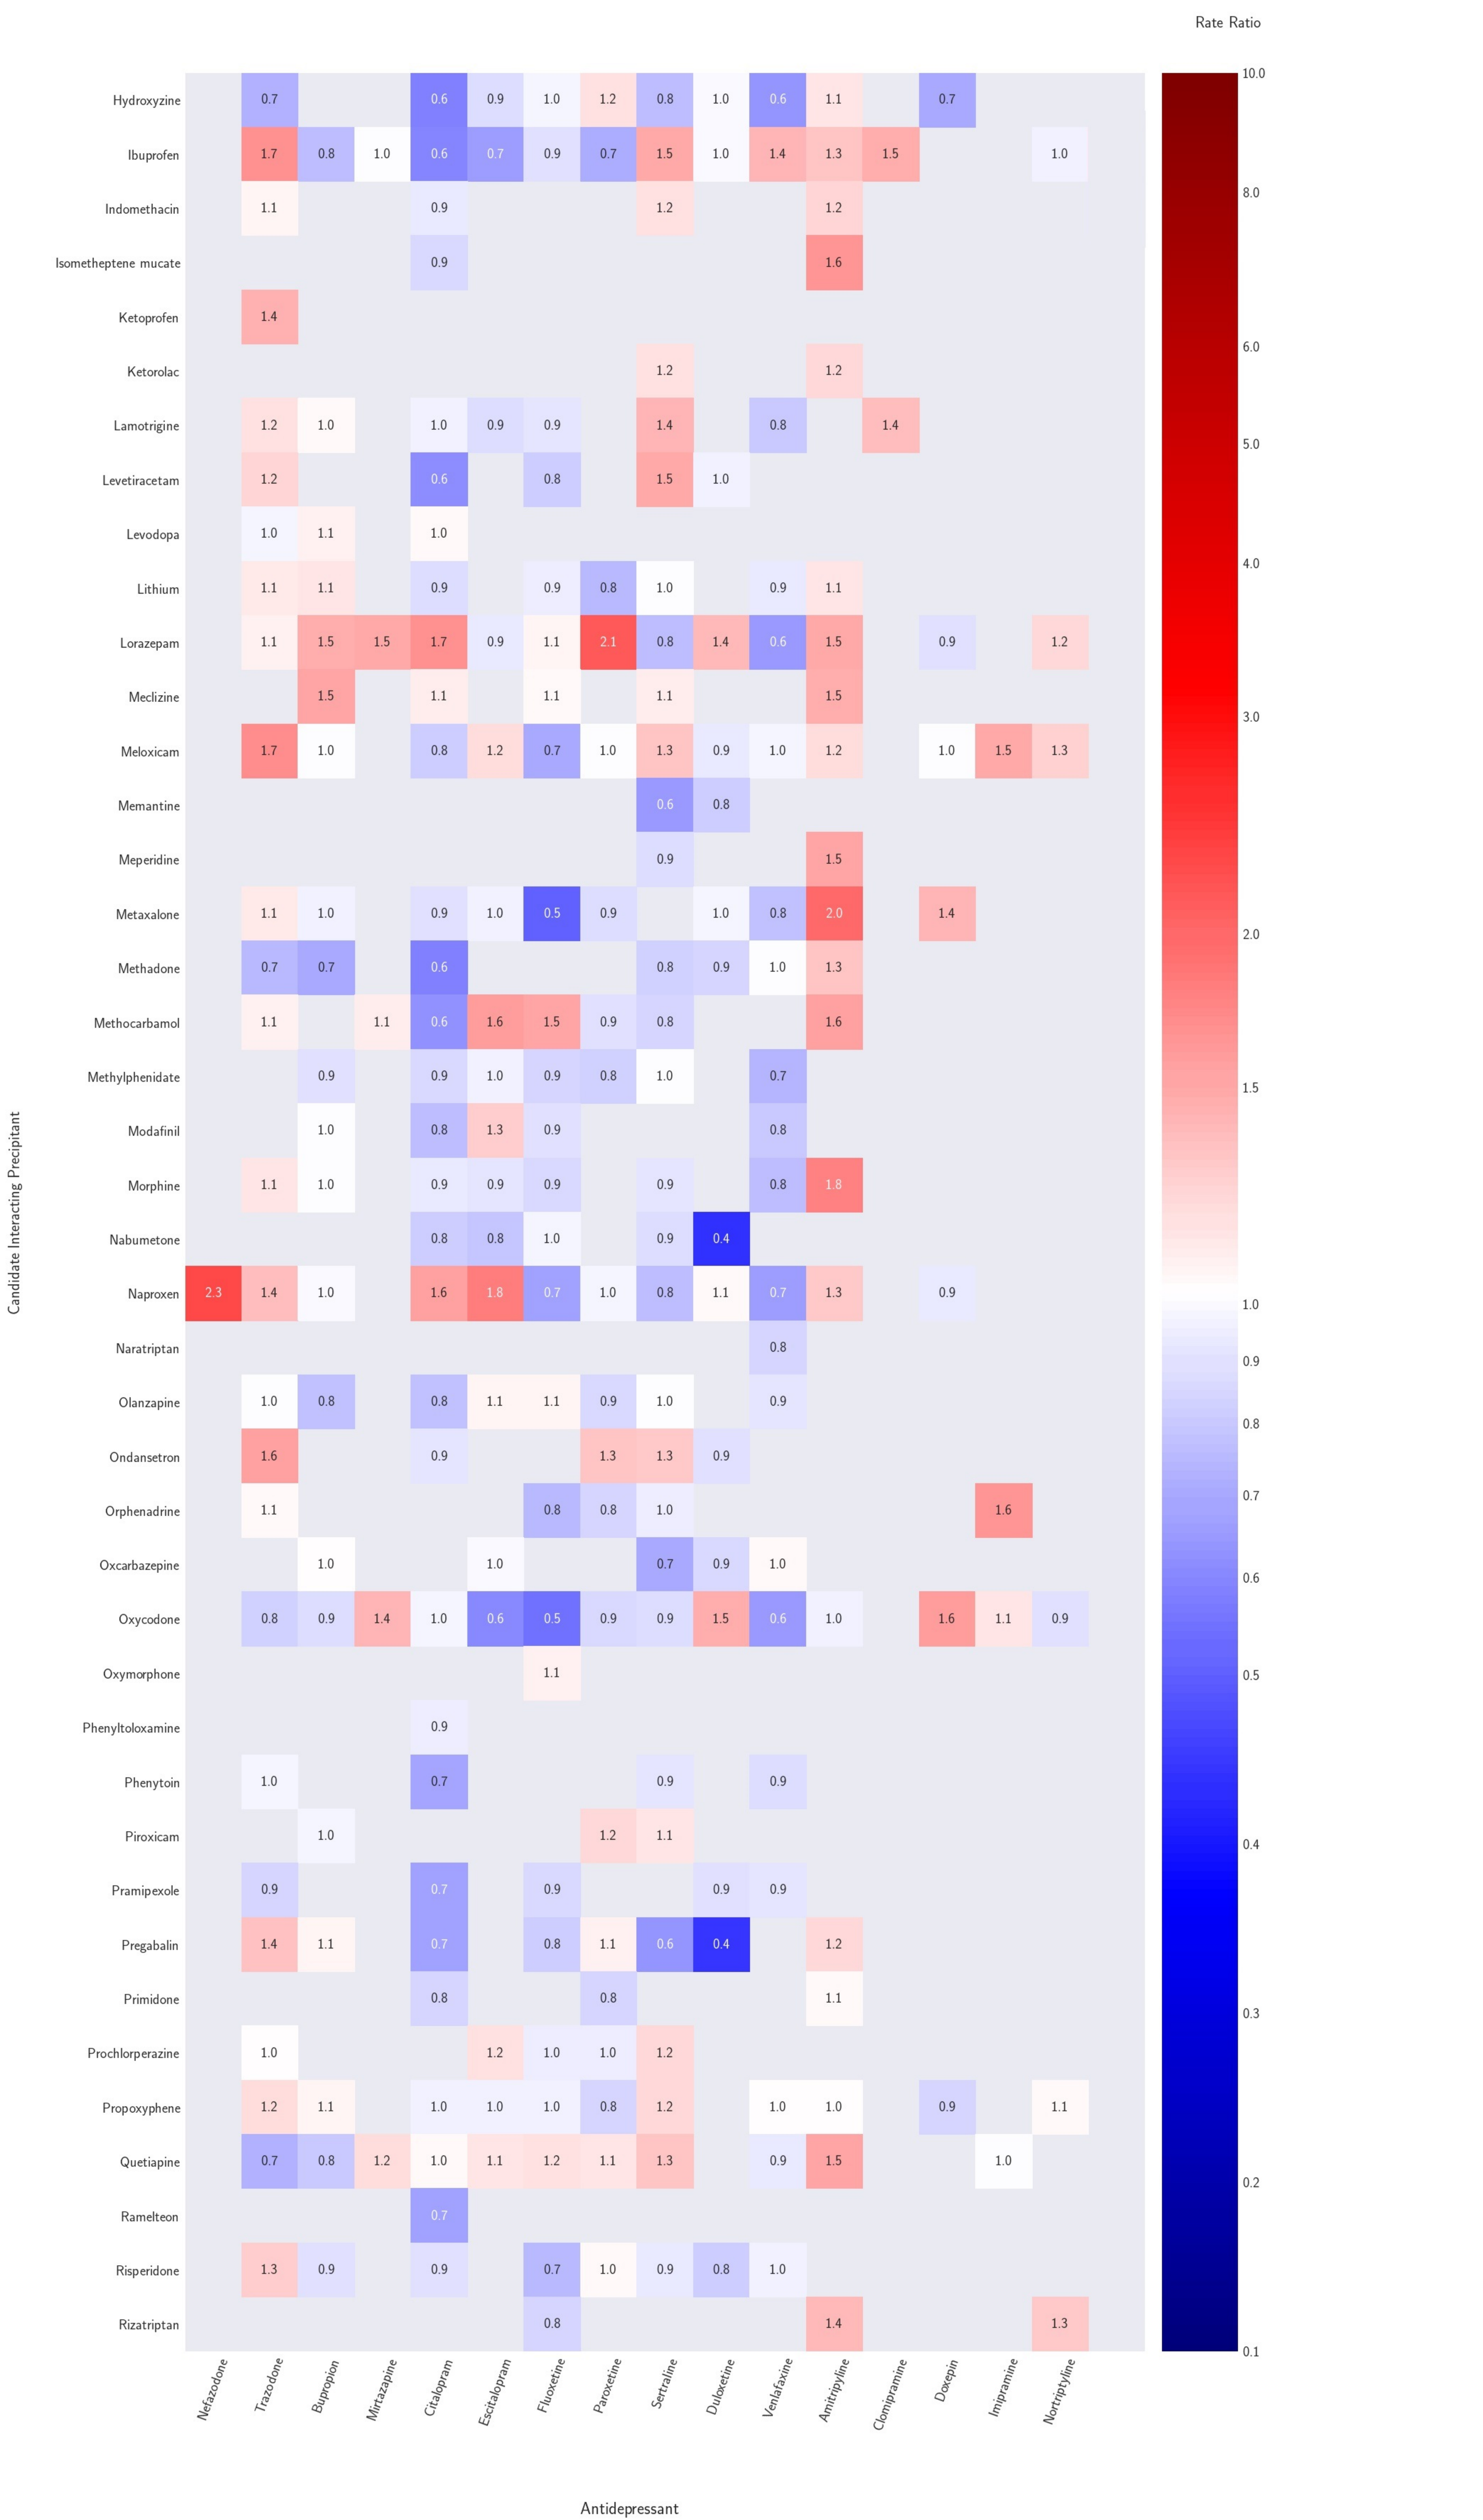



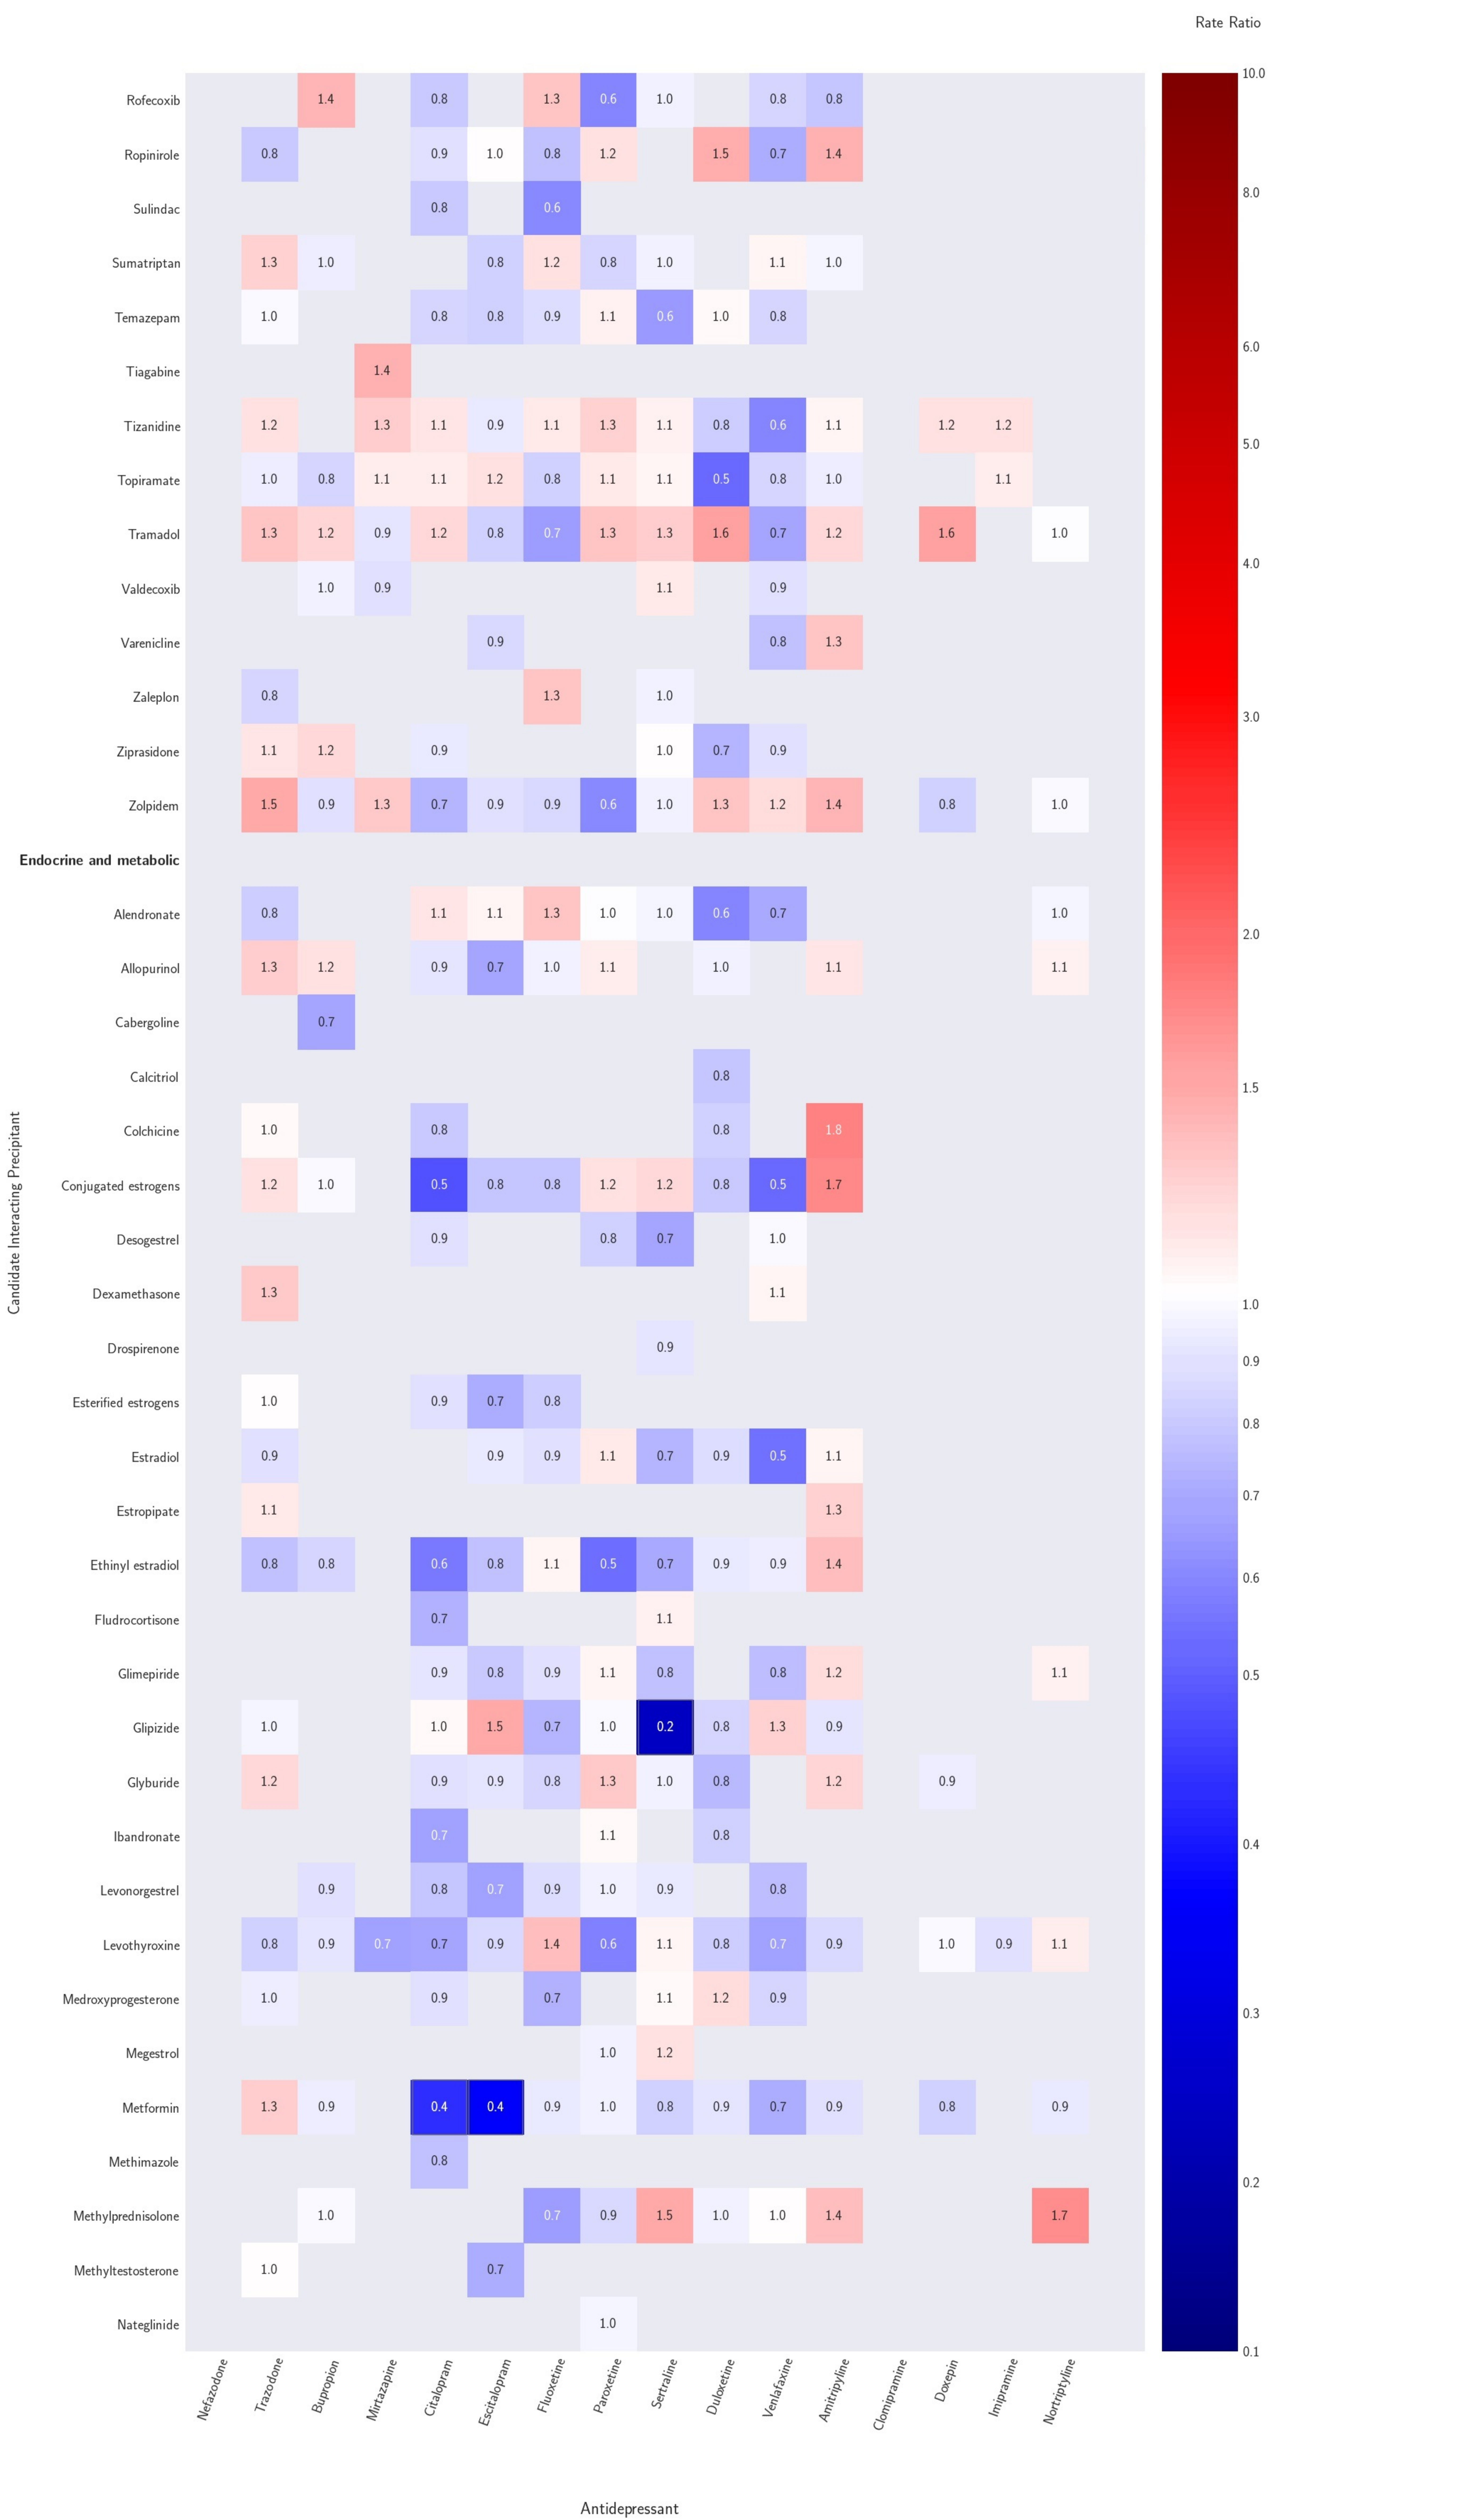







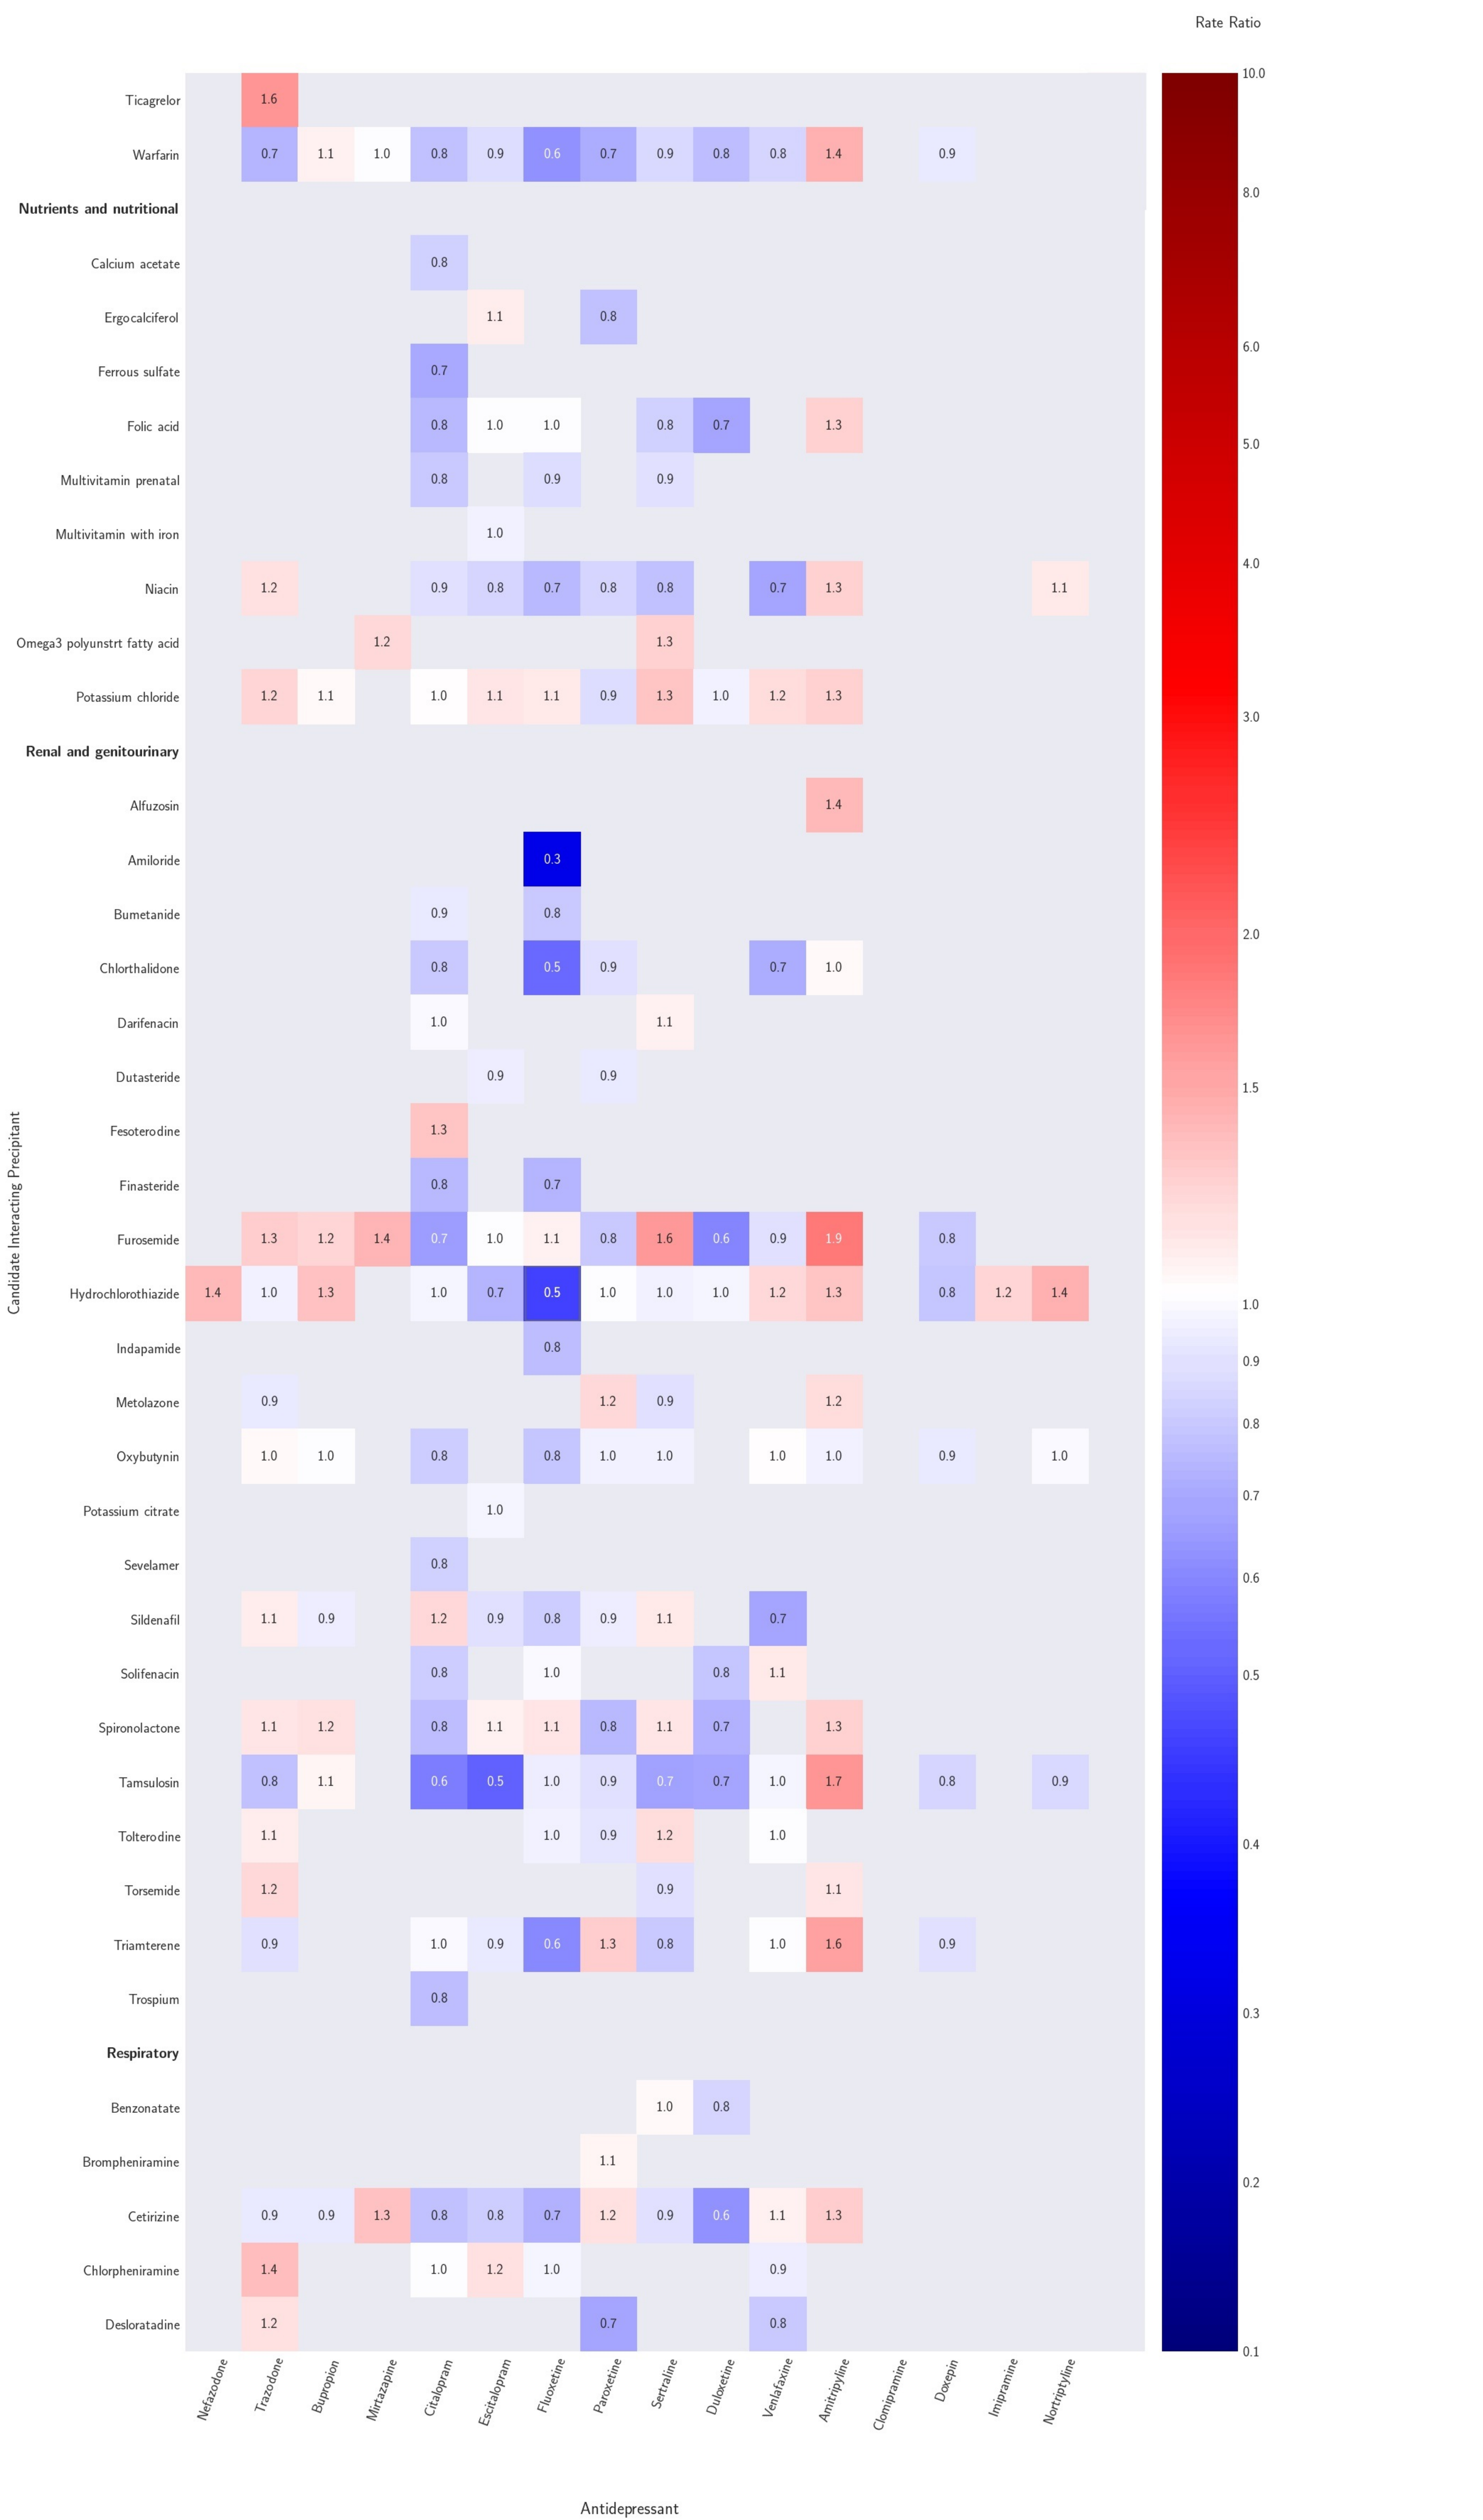



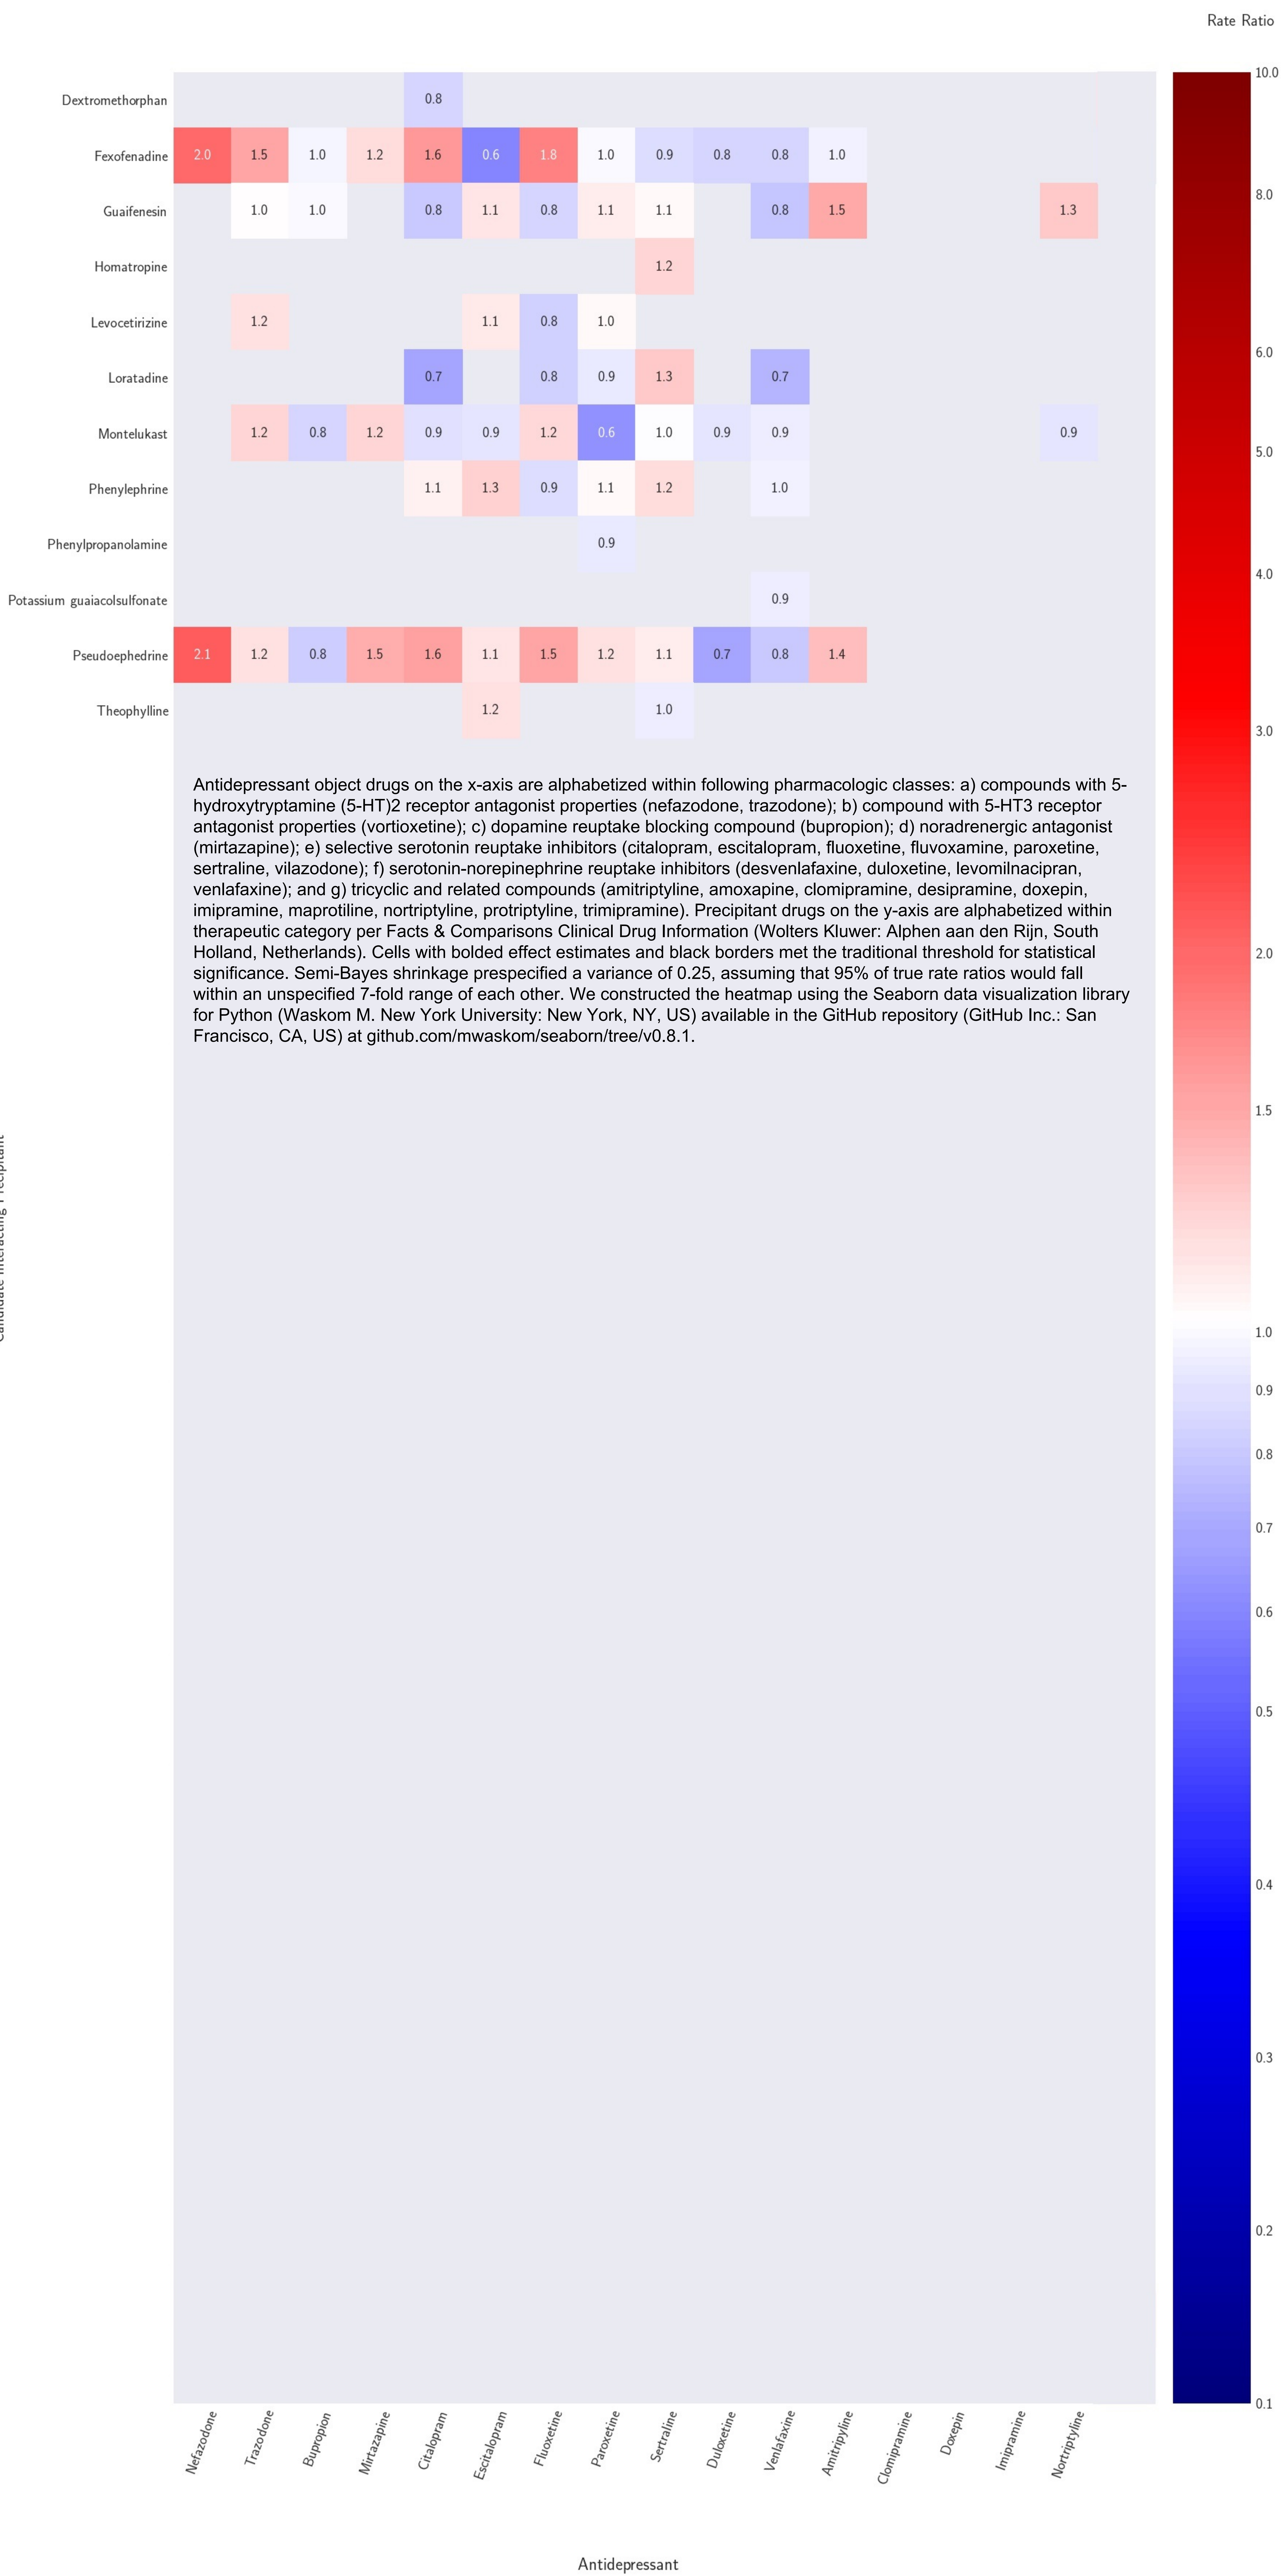

Supplement: NIHMS1674792-supplement-FIG_S1C.pdf [file NIHMS1674792-supplement-FIG_S1C.pdf]
