# Supplementary material
Source: PubMed Central journal article supplement (PMC8316258)

Supplemental Figure 2, Panel C. Heatmap depicting semi-Bayes shrunk adjusted rate ratios for motor vehicle crash, by antidepressant object drug cohort | Prespecified secondary analysis increasing semi-Bayes shrinkage variance parameter.

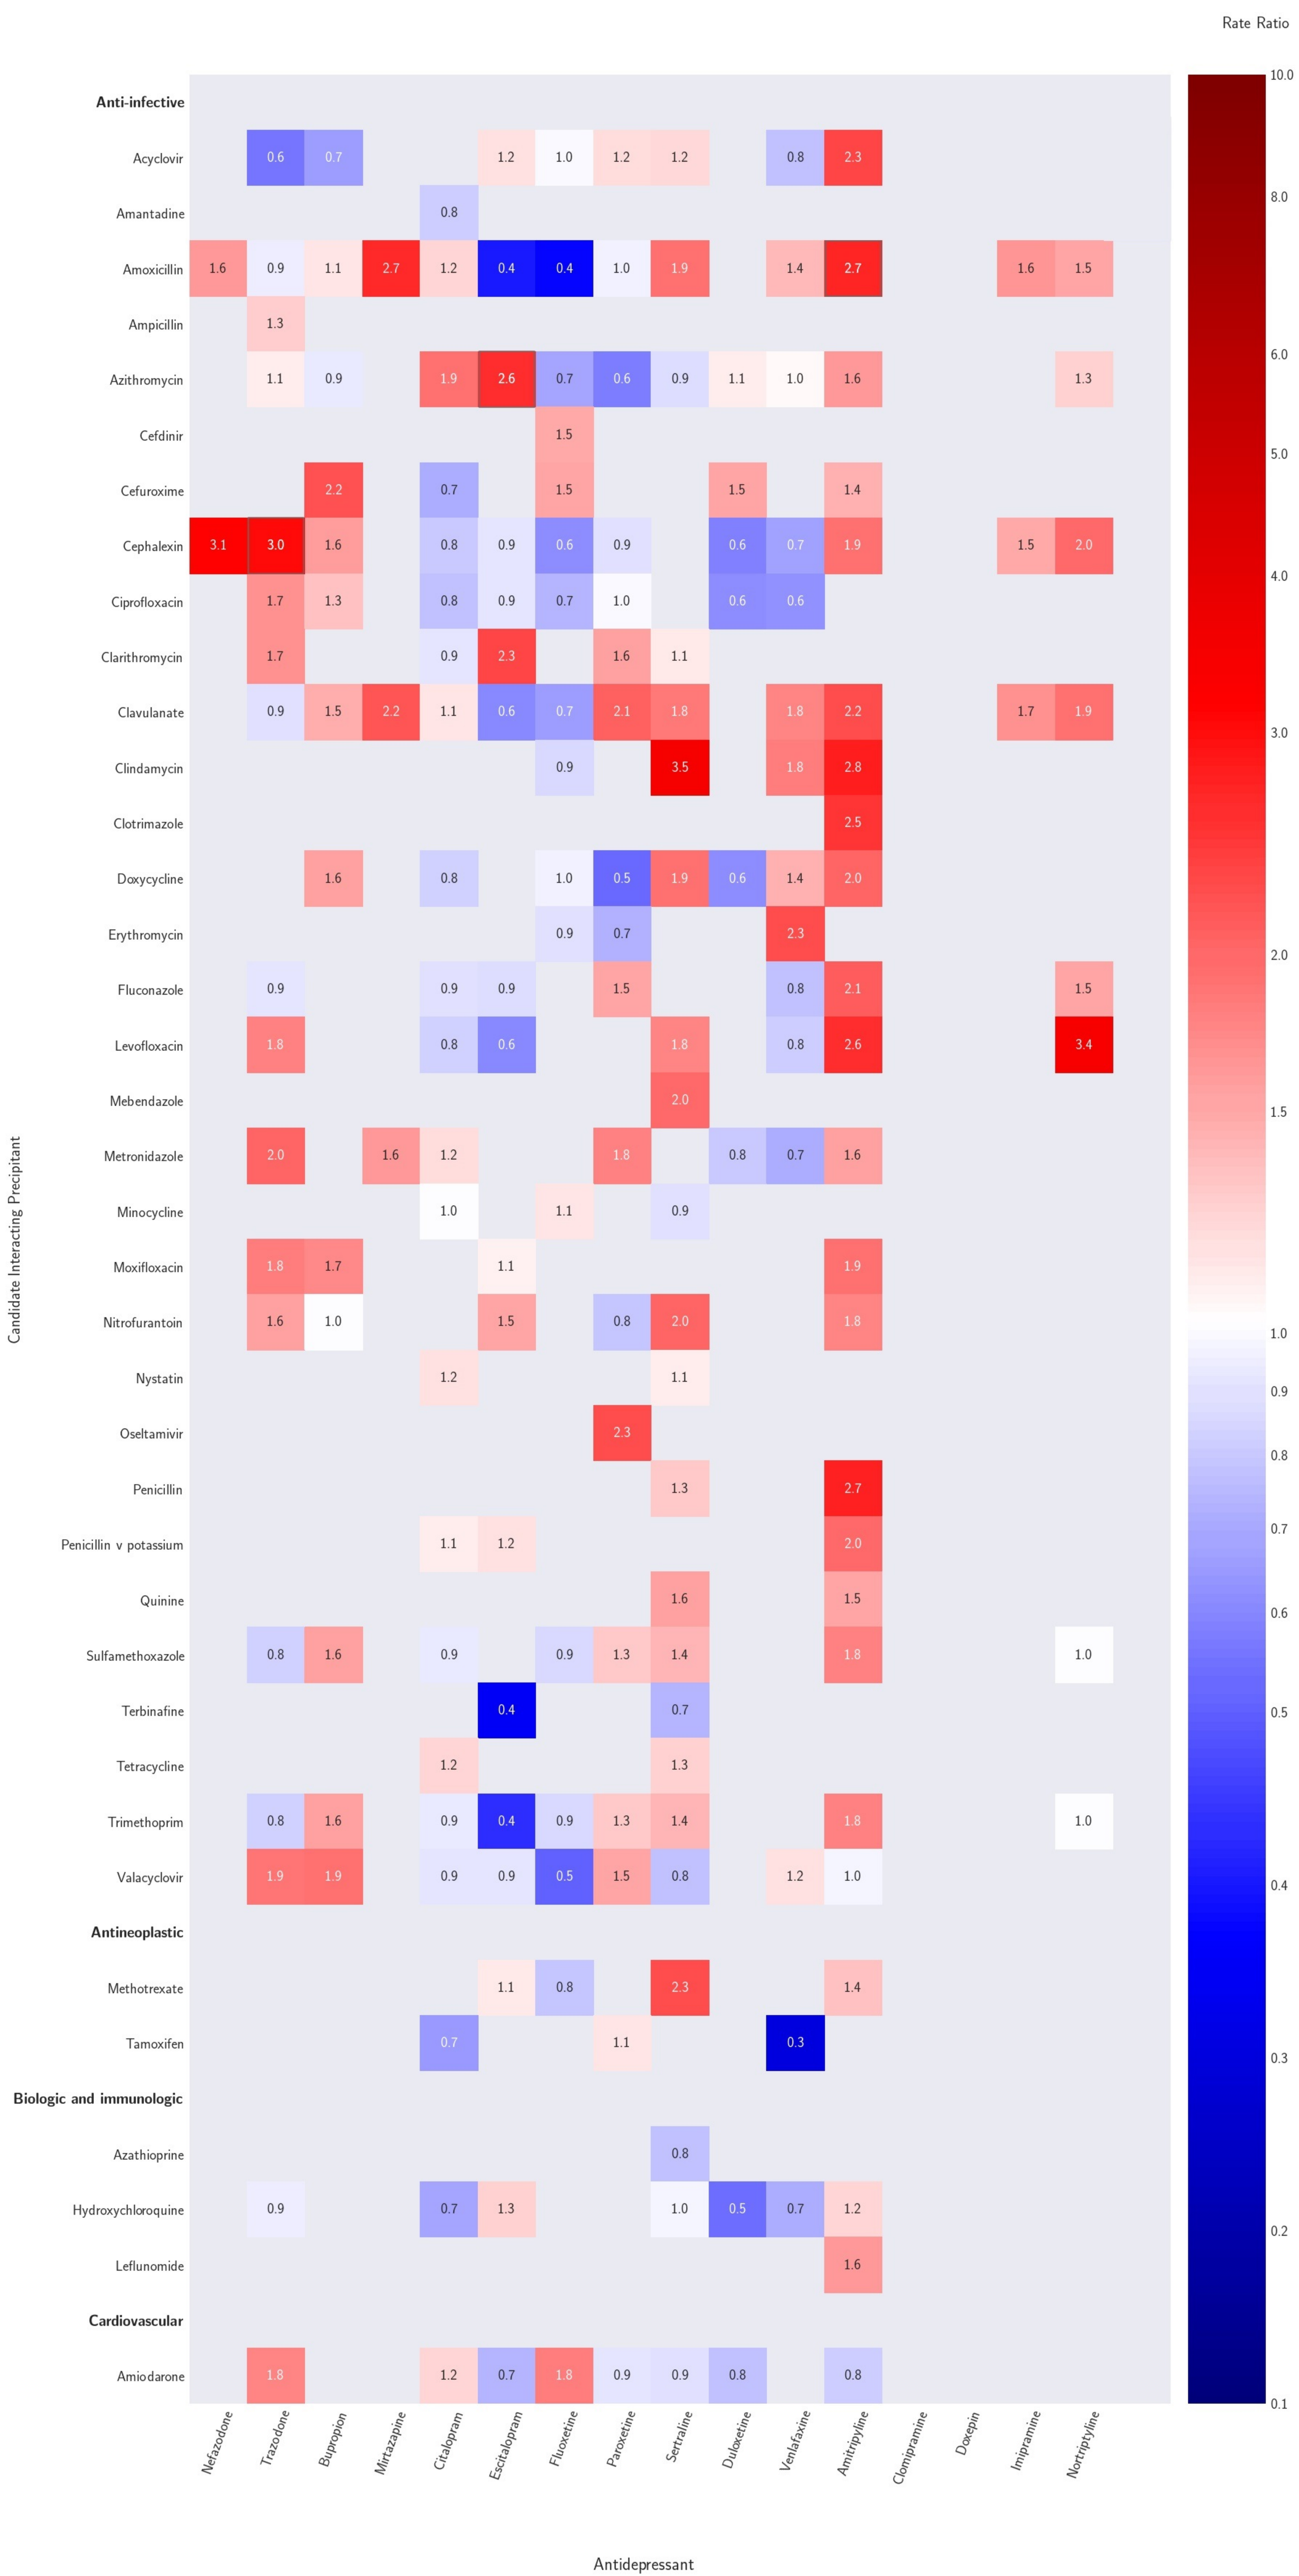



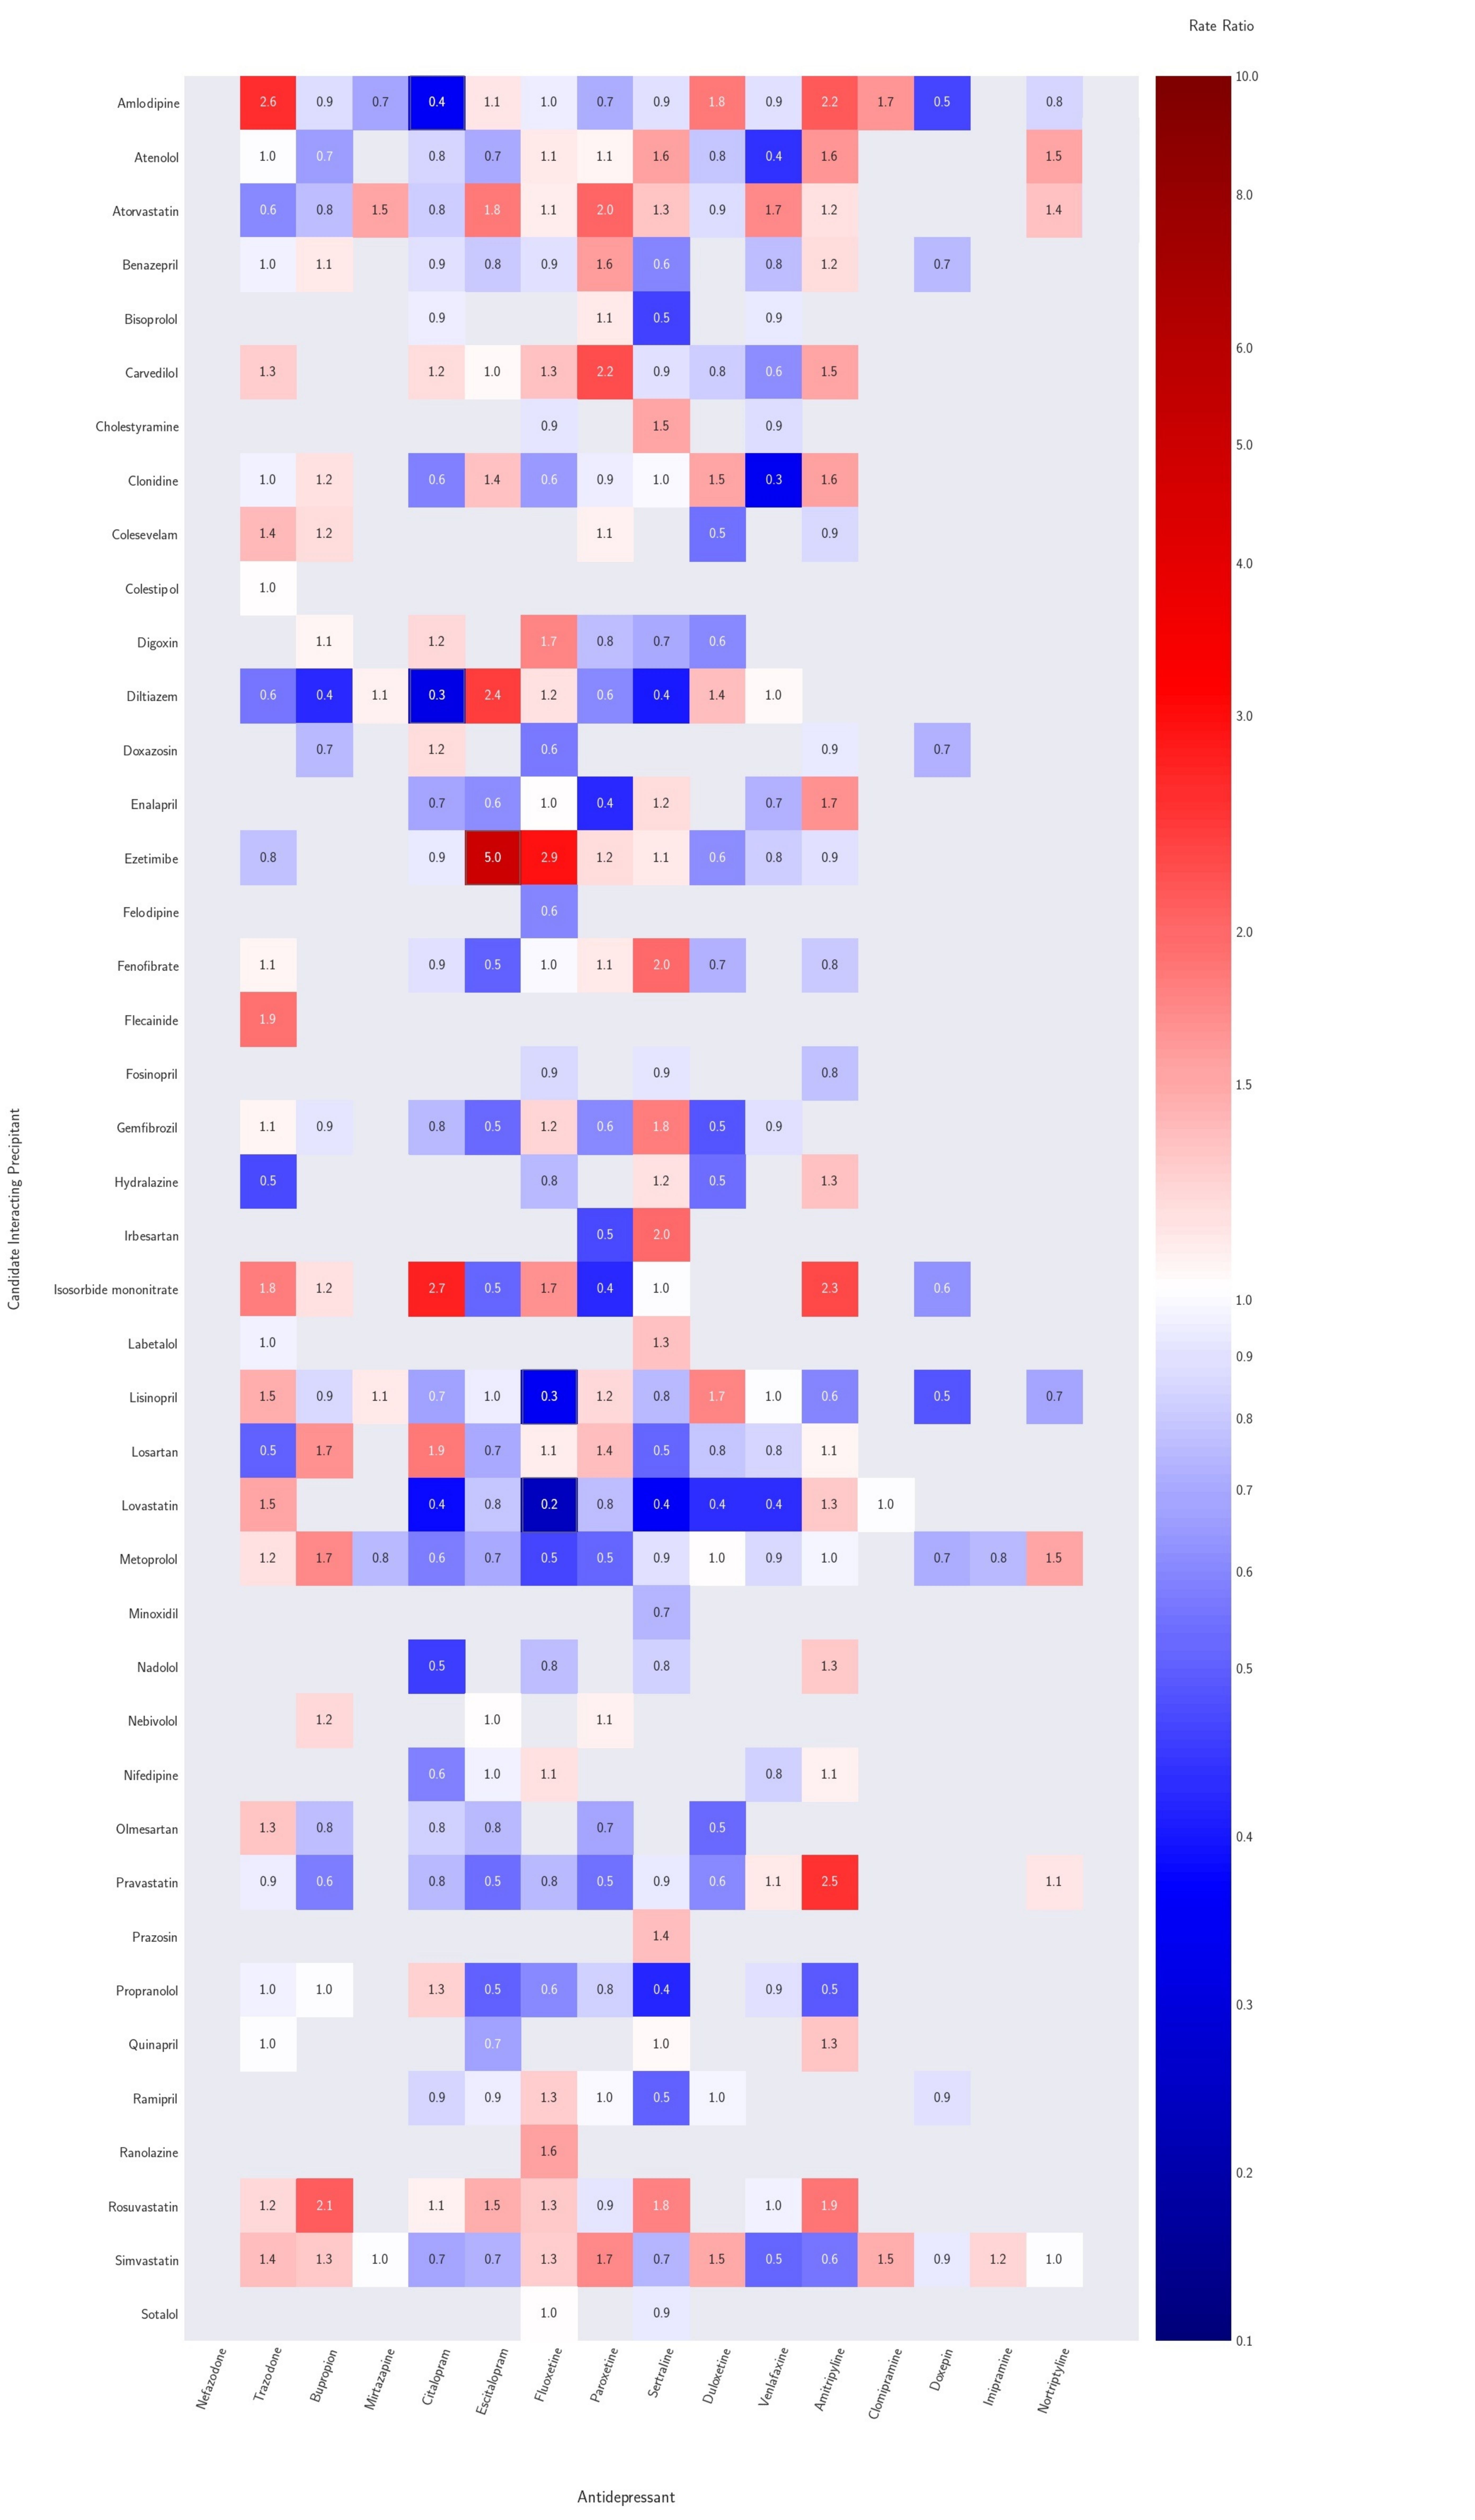



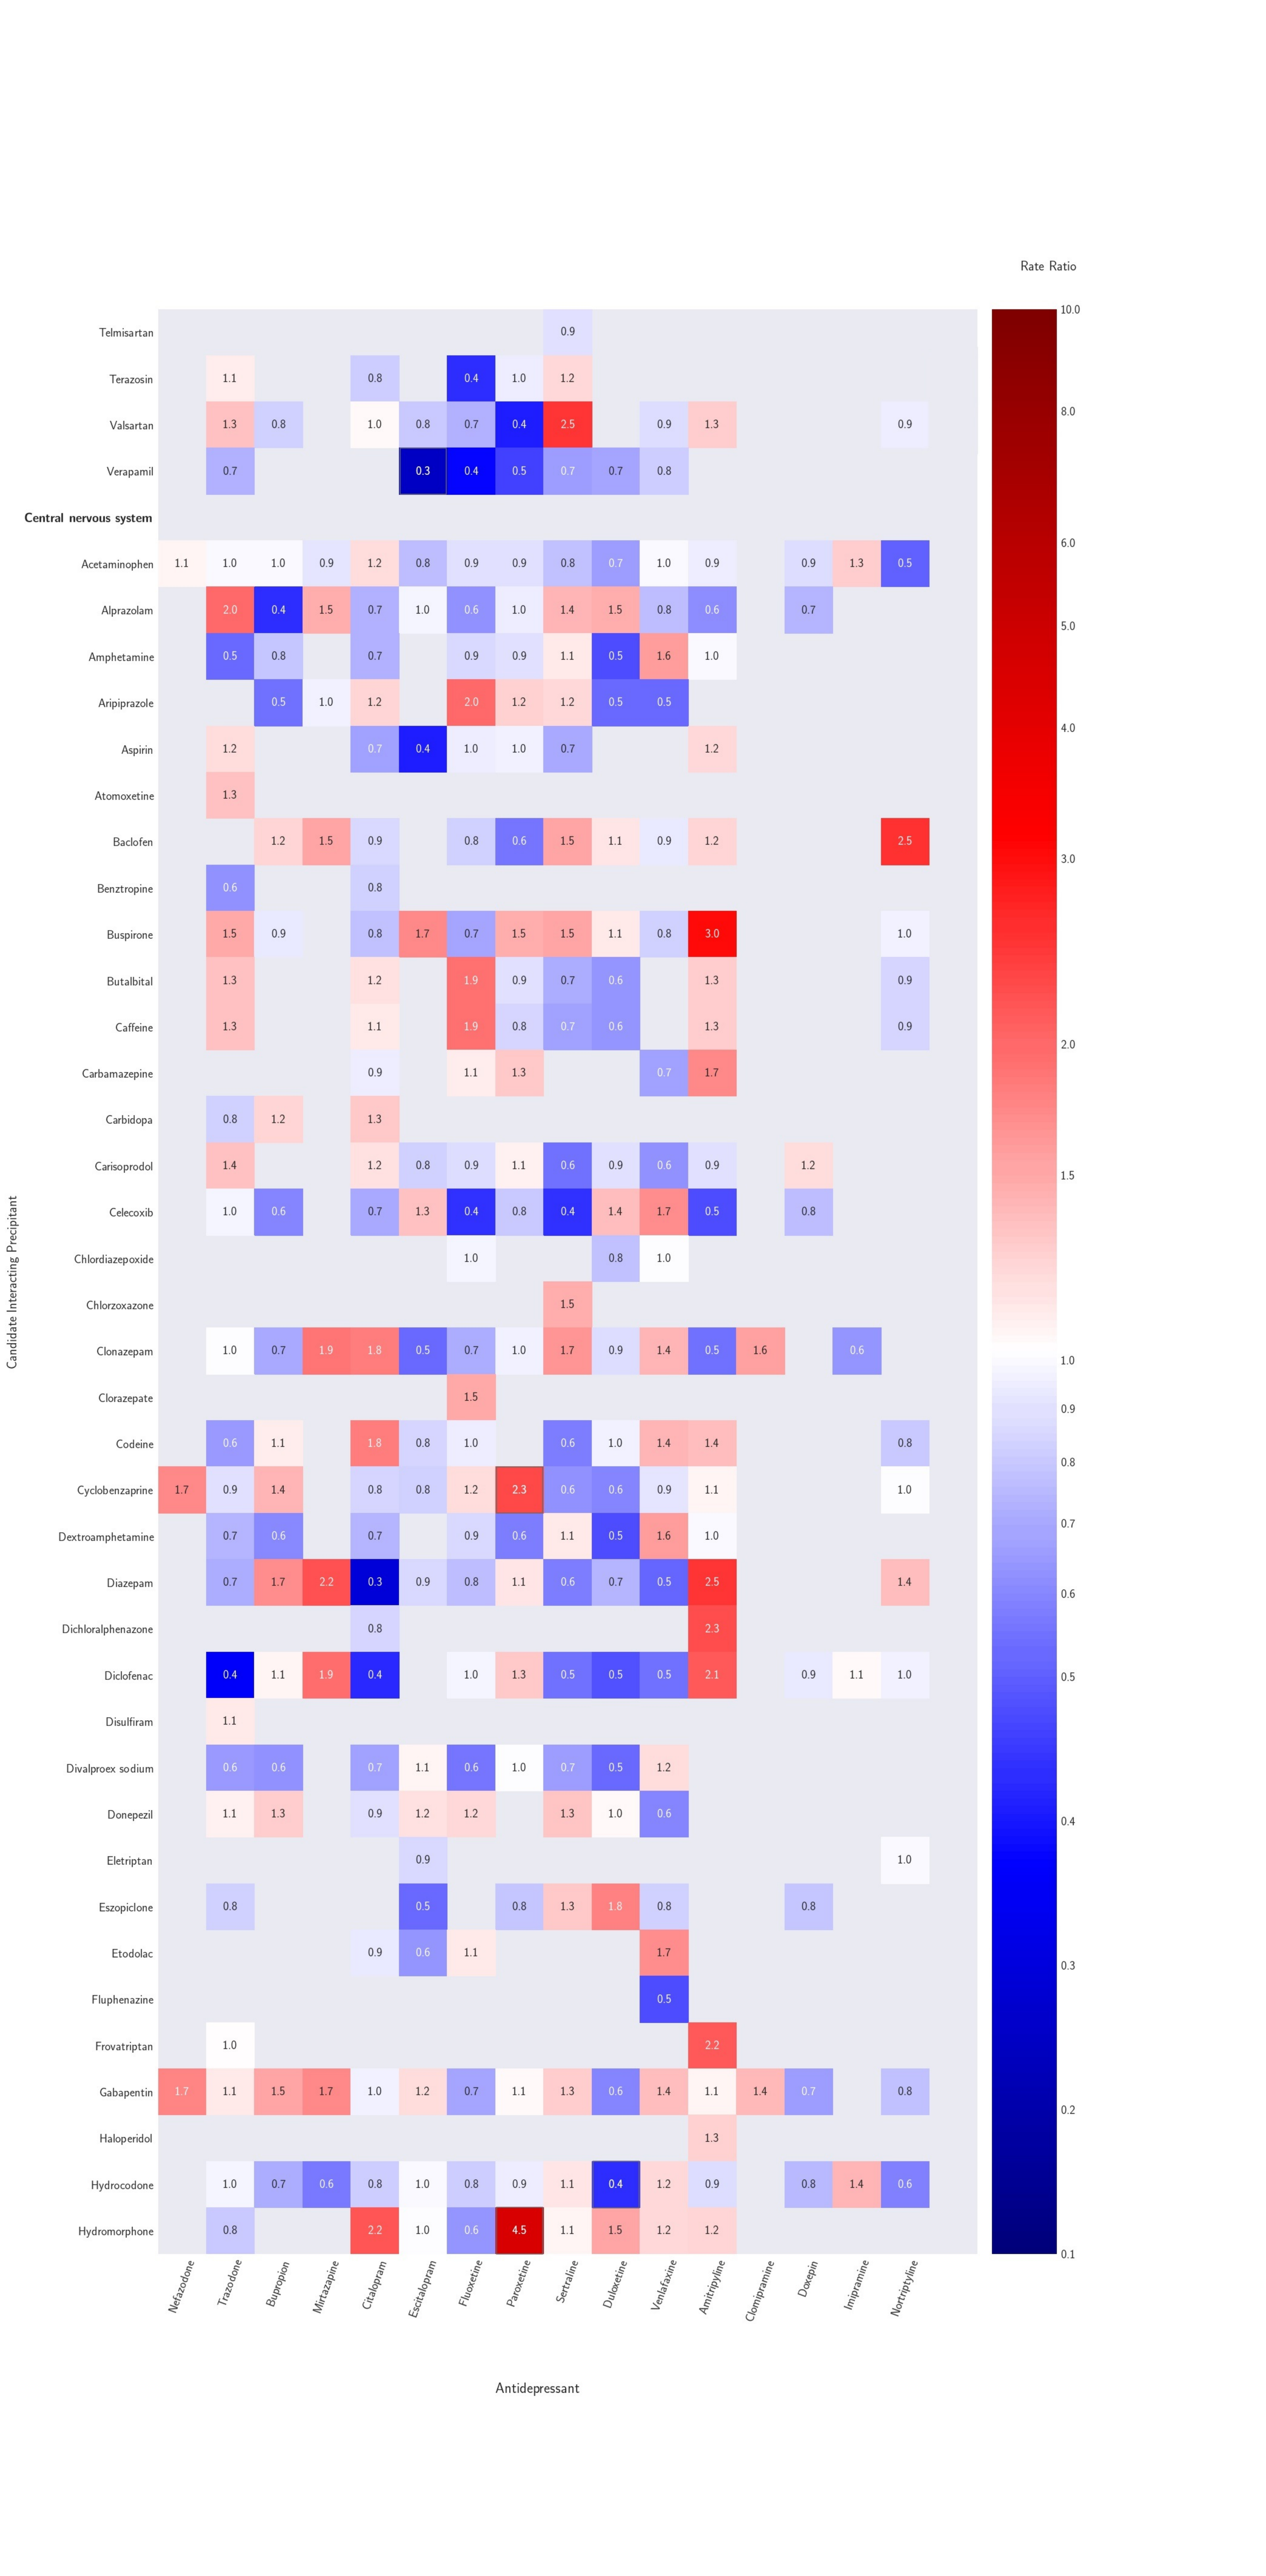



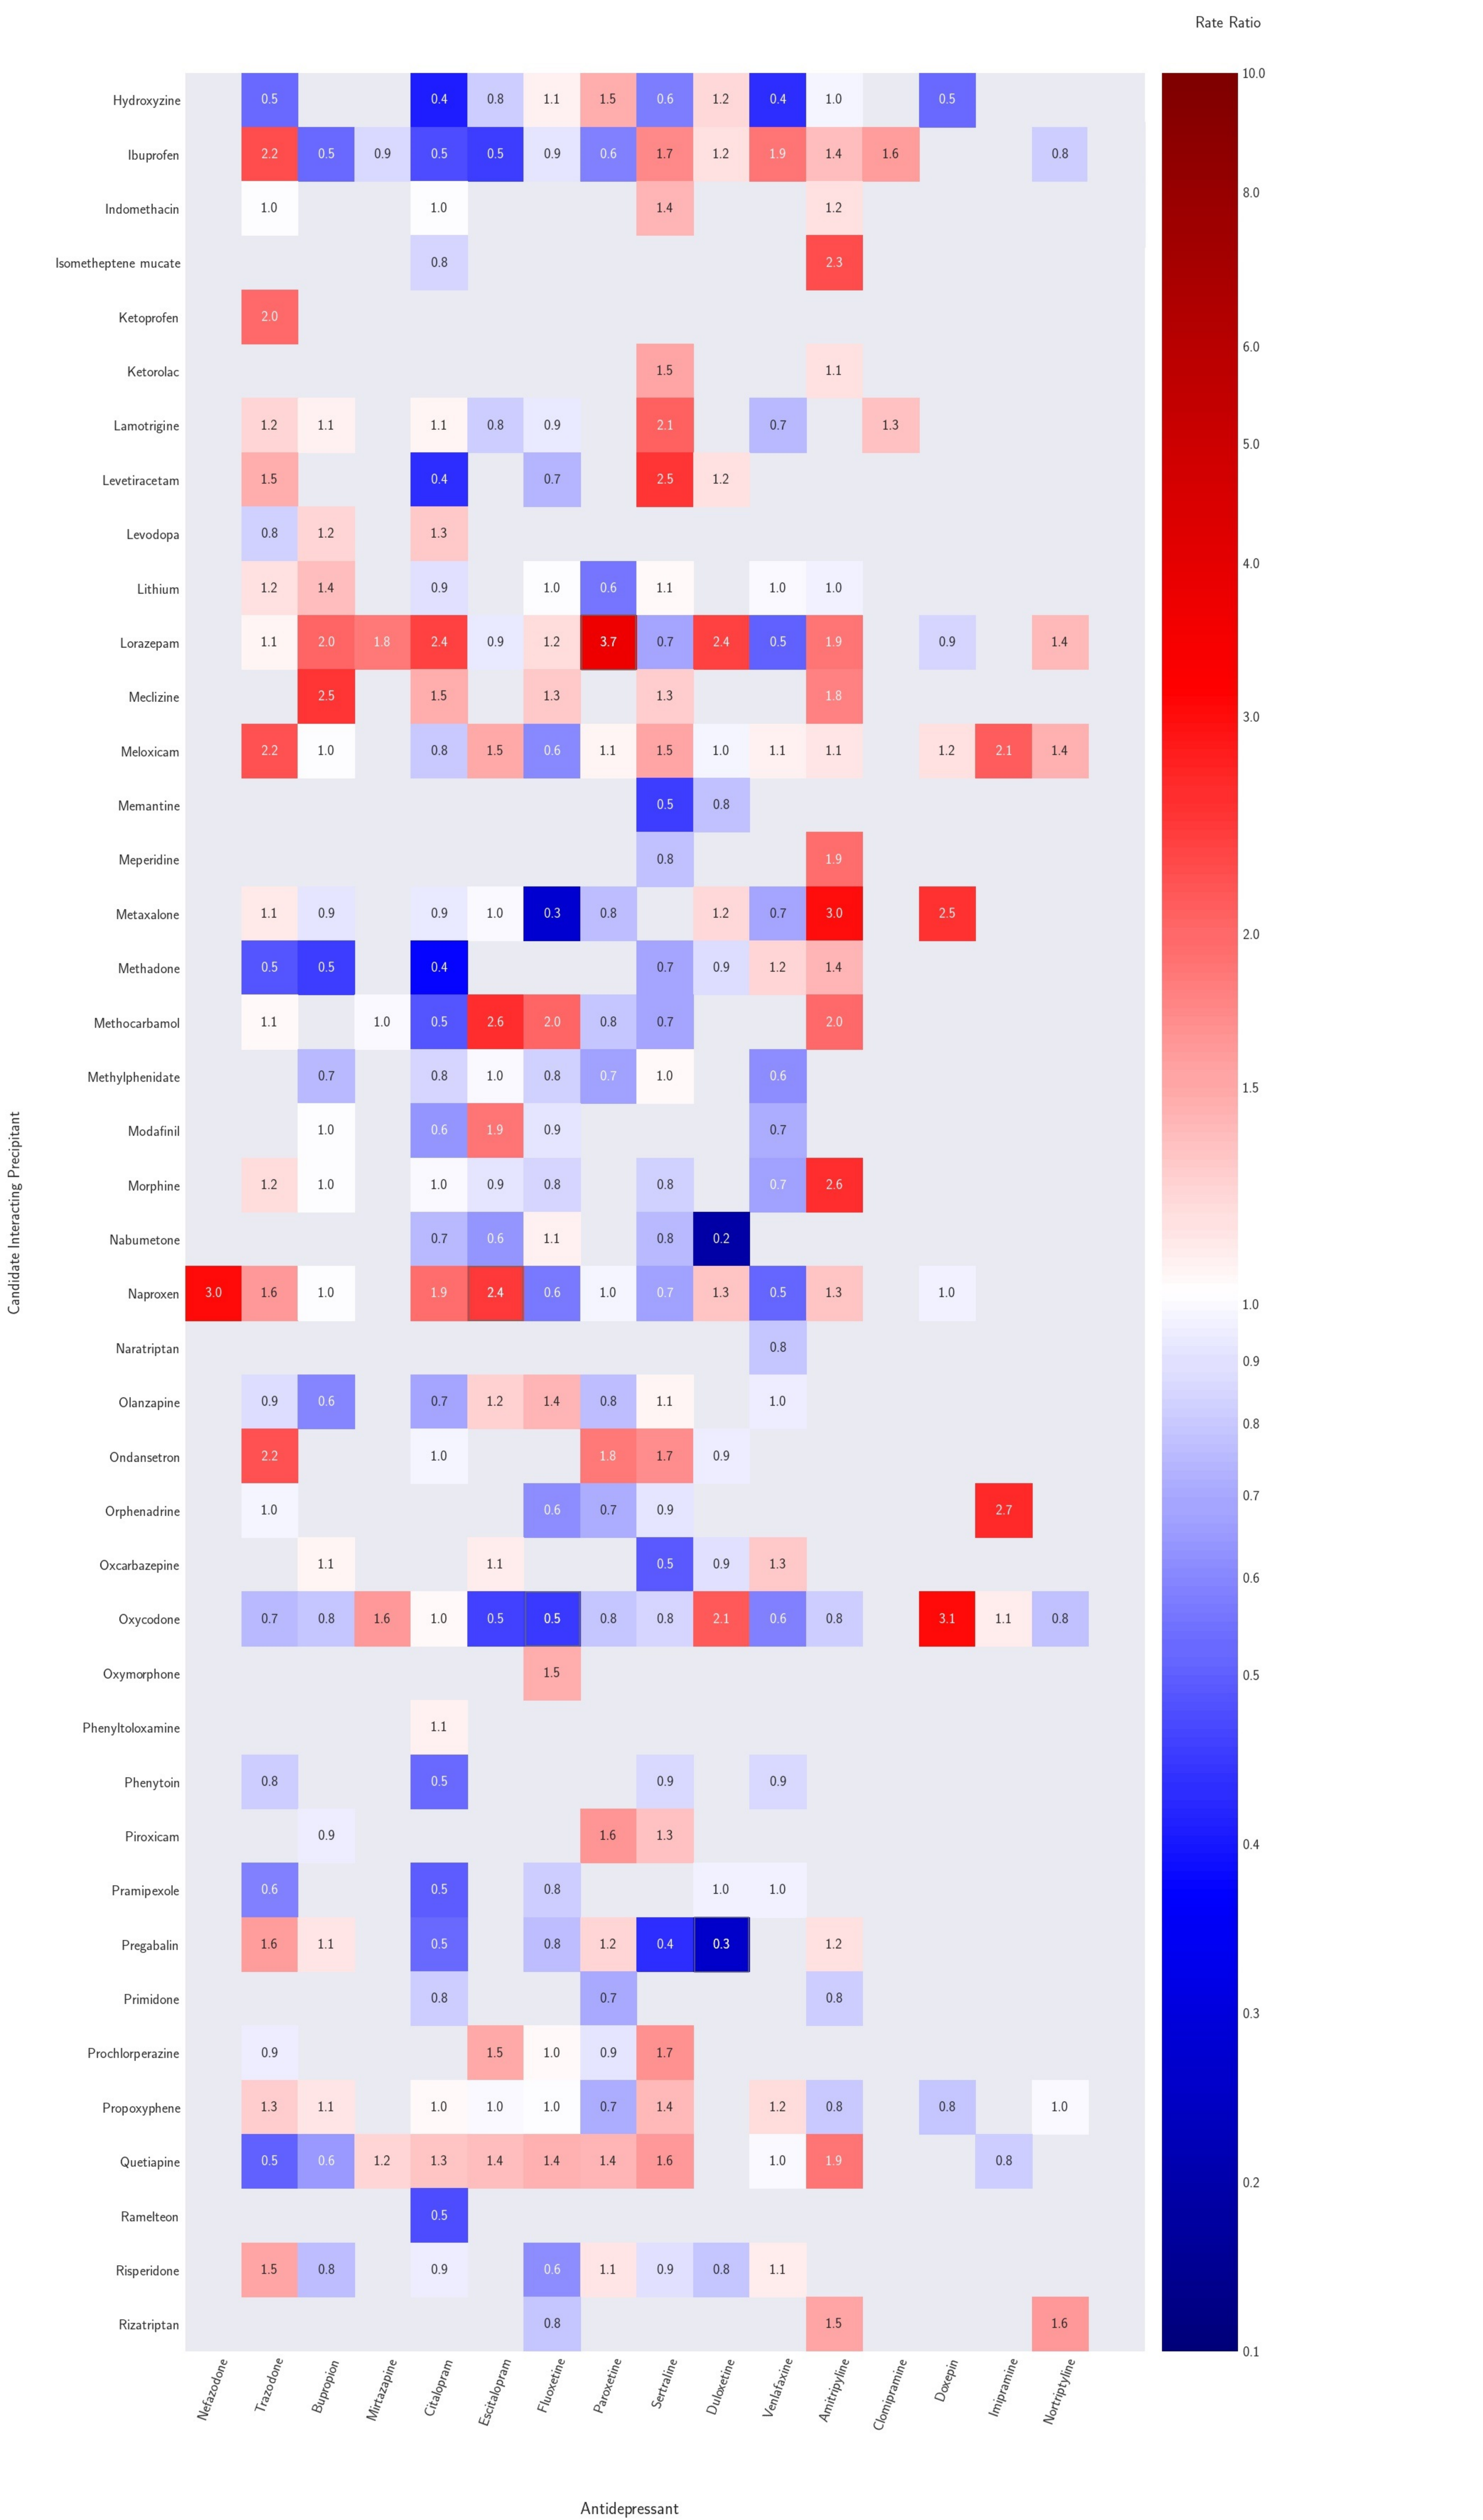



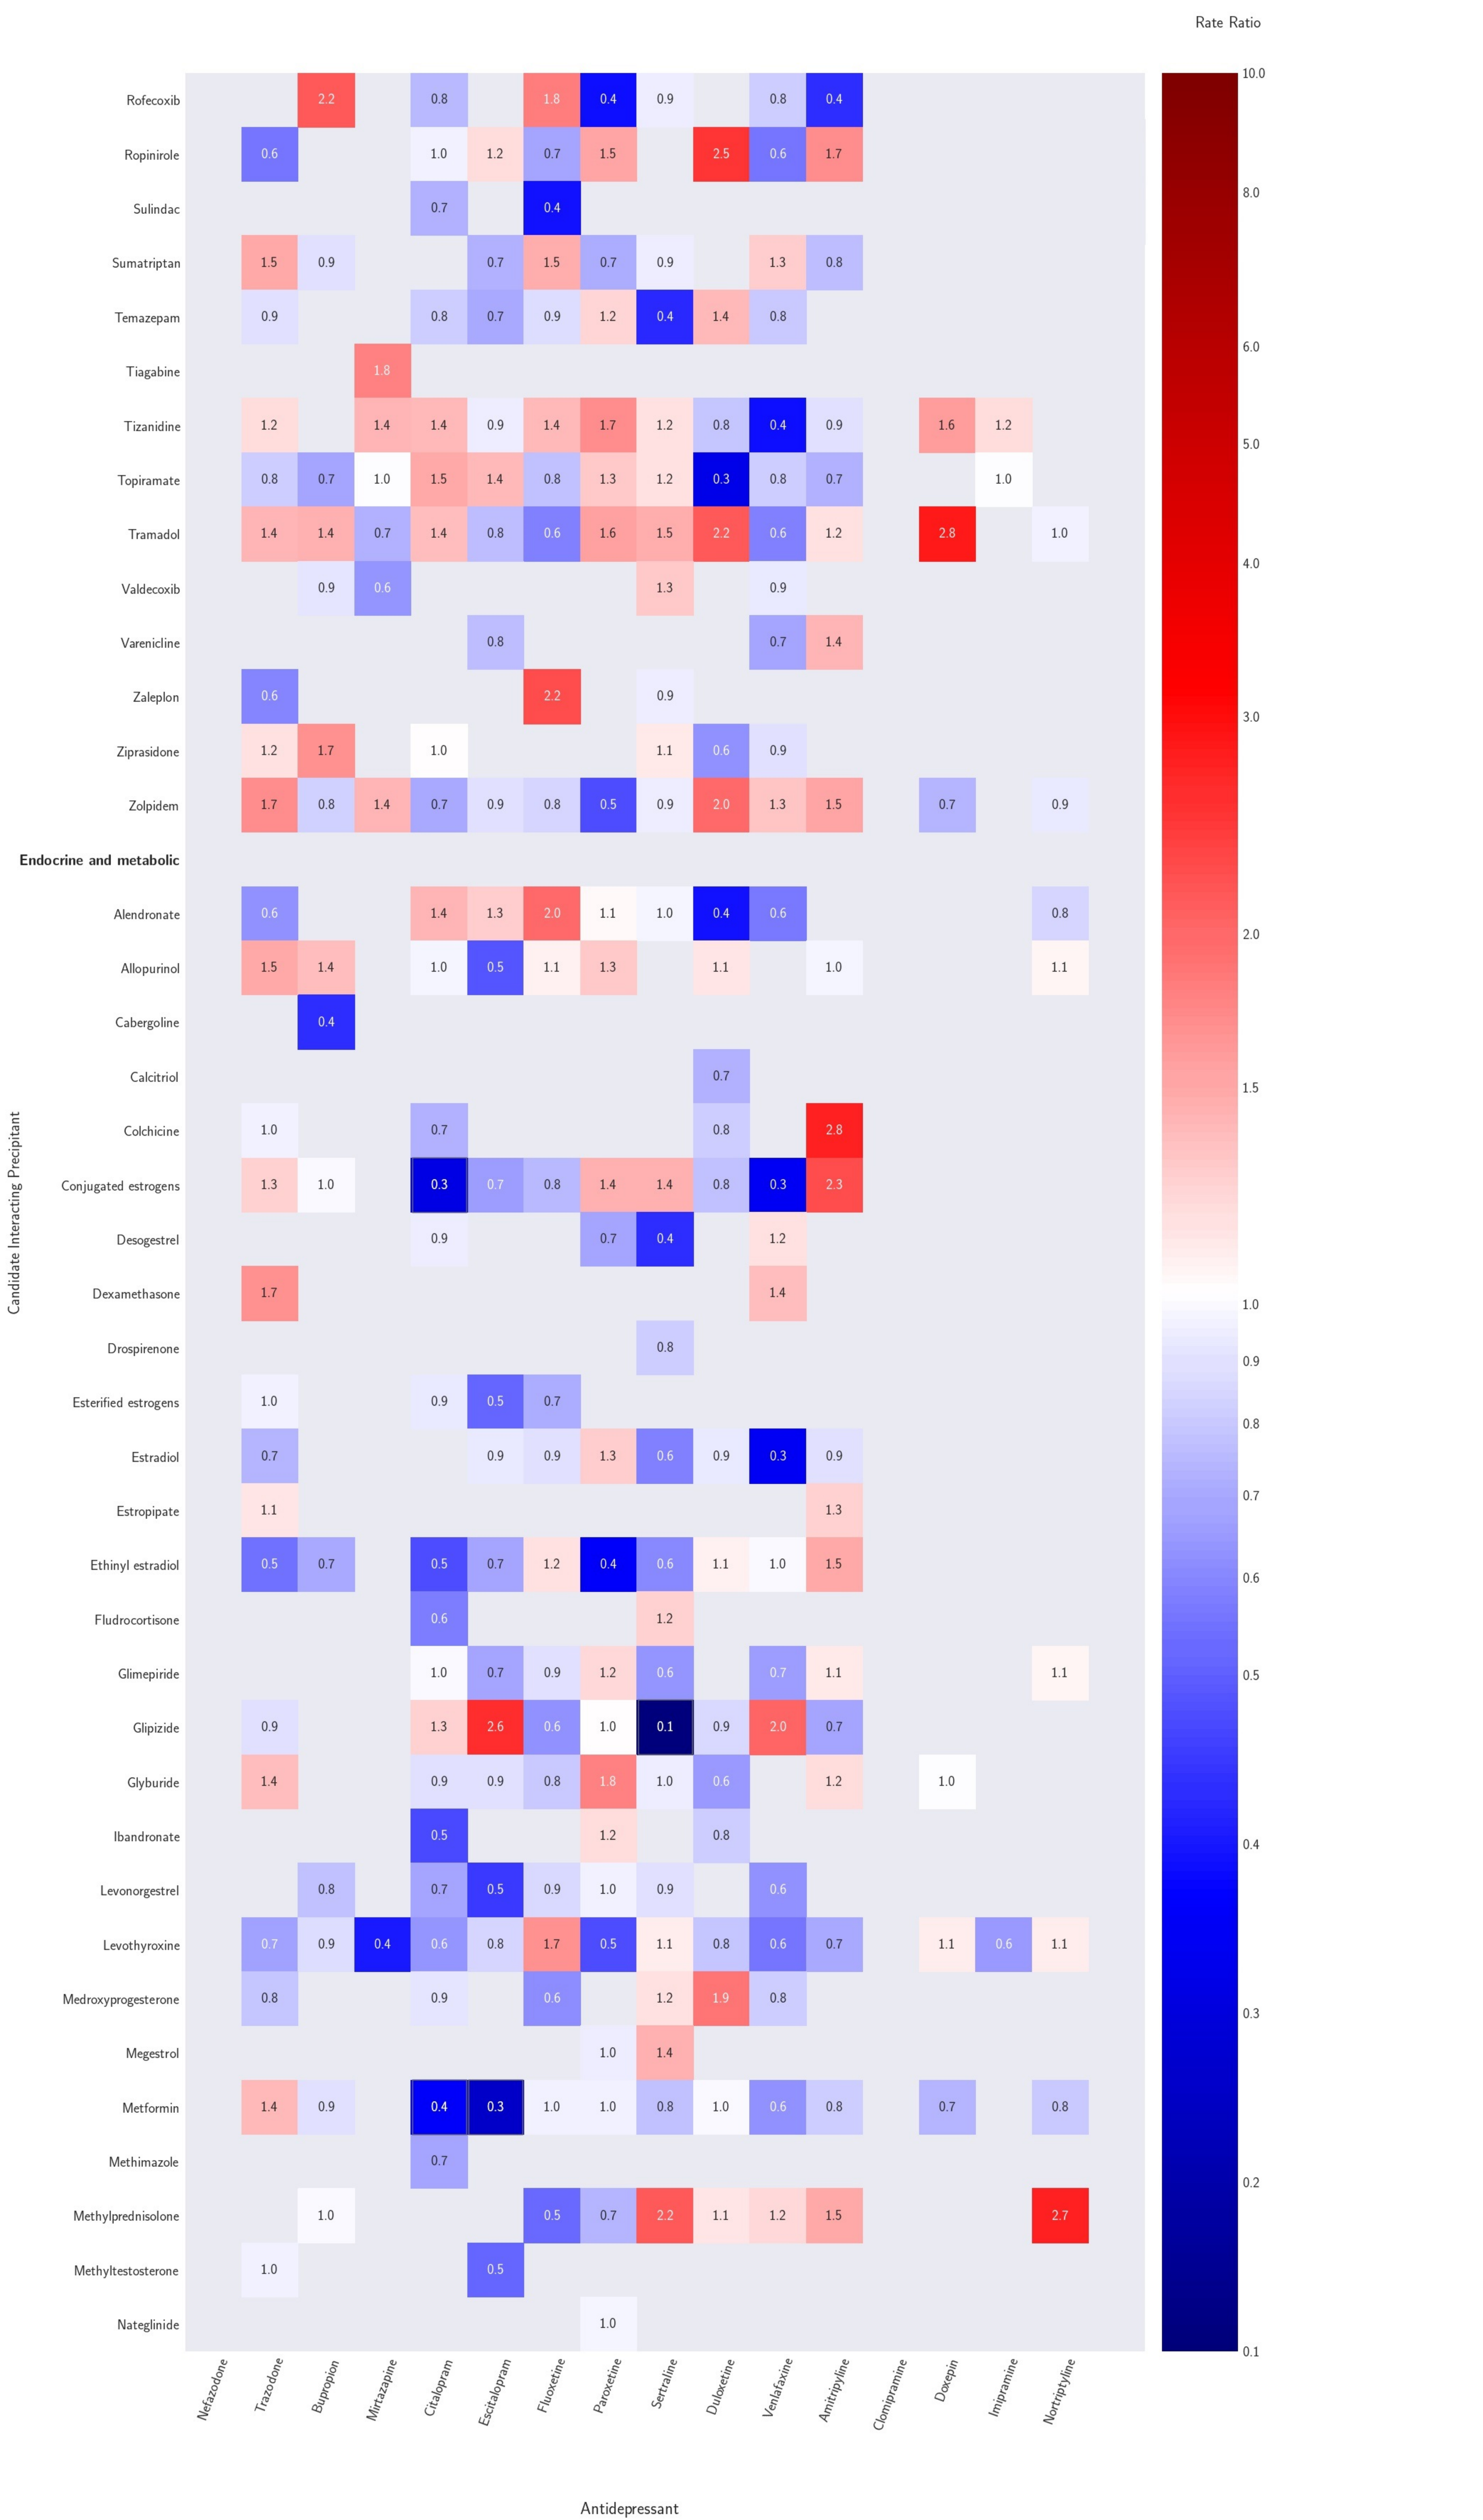



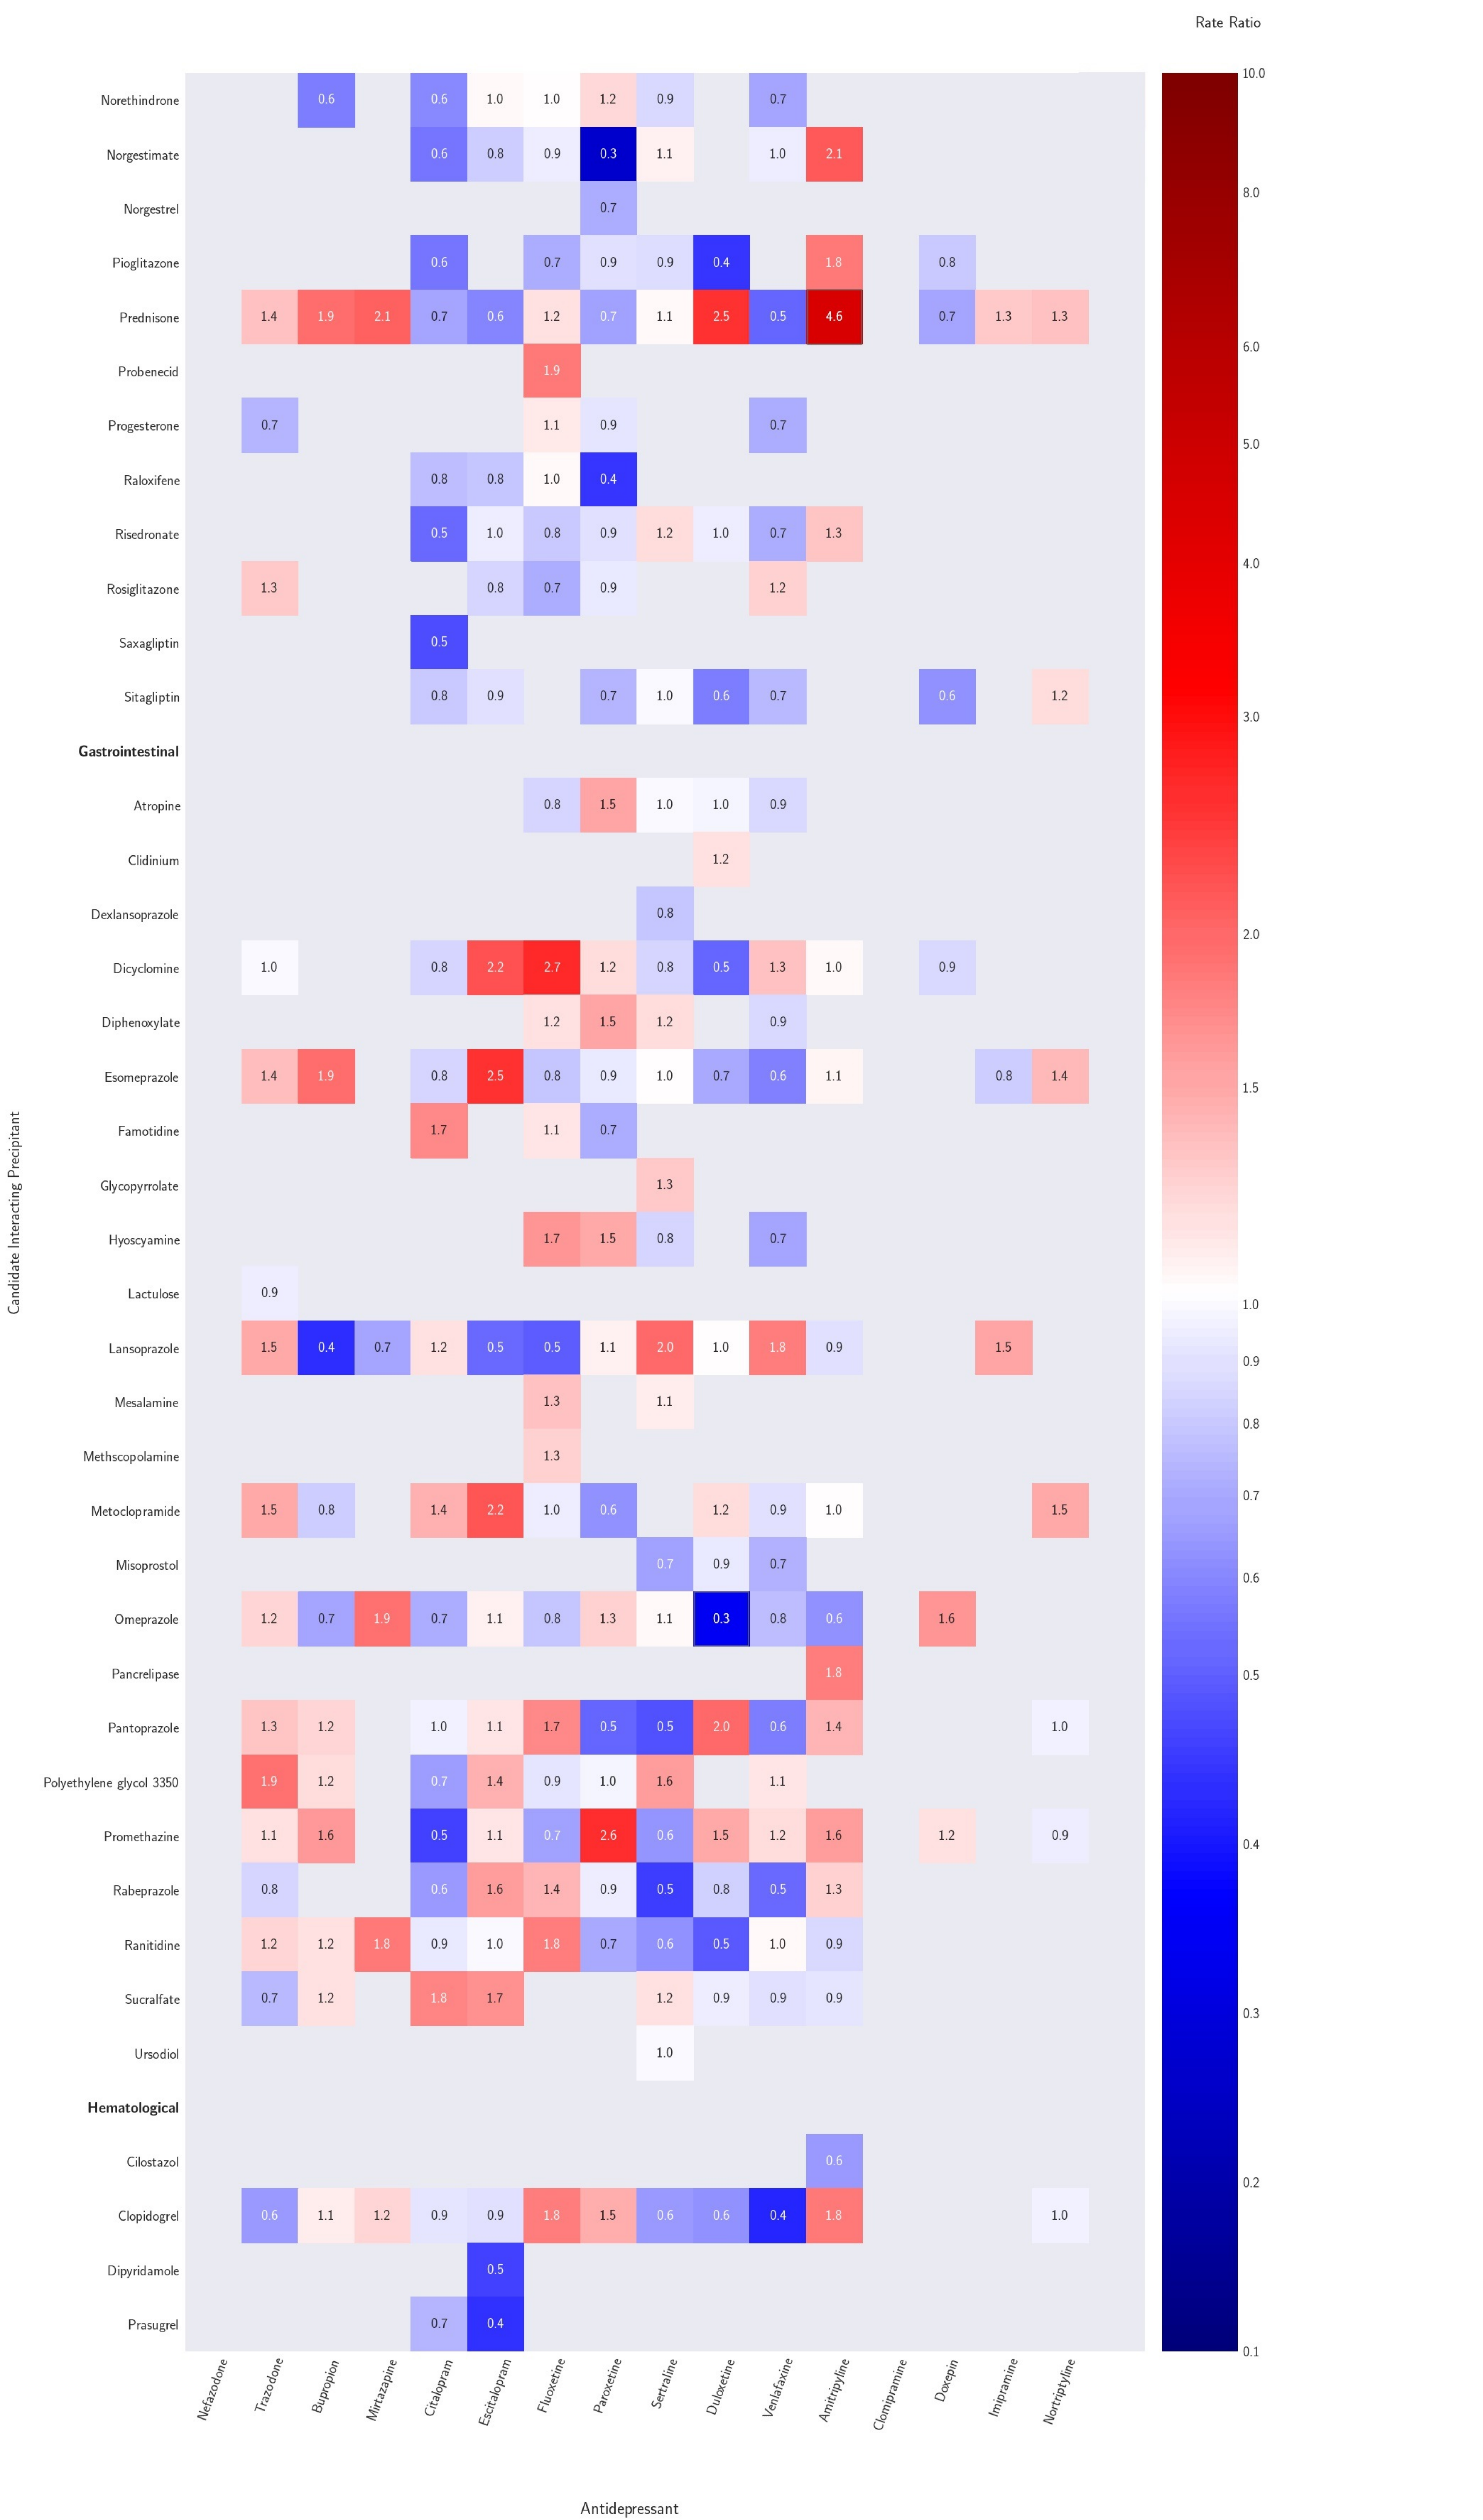



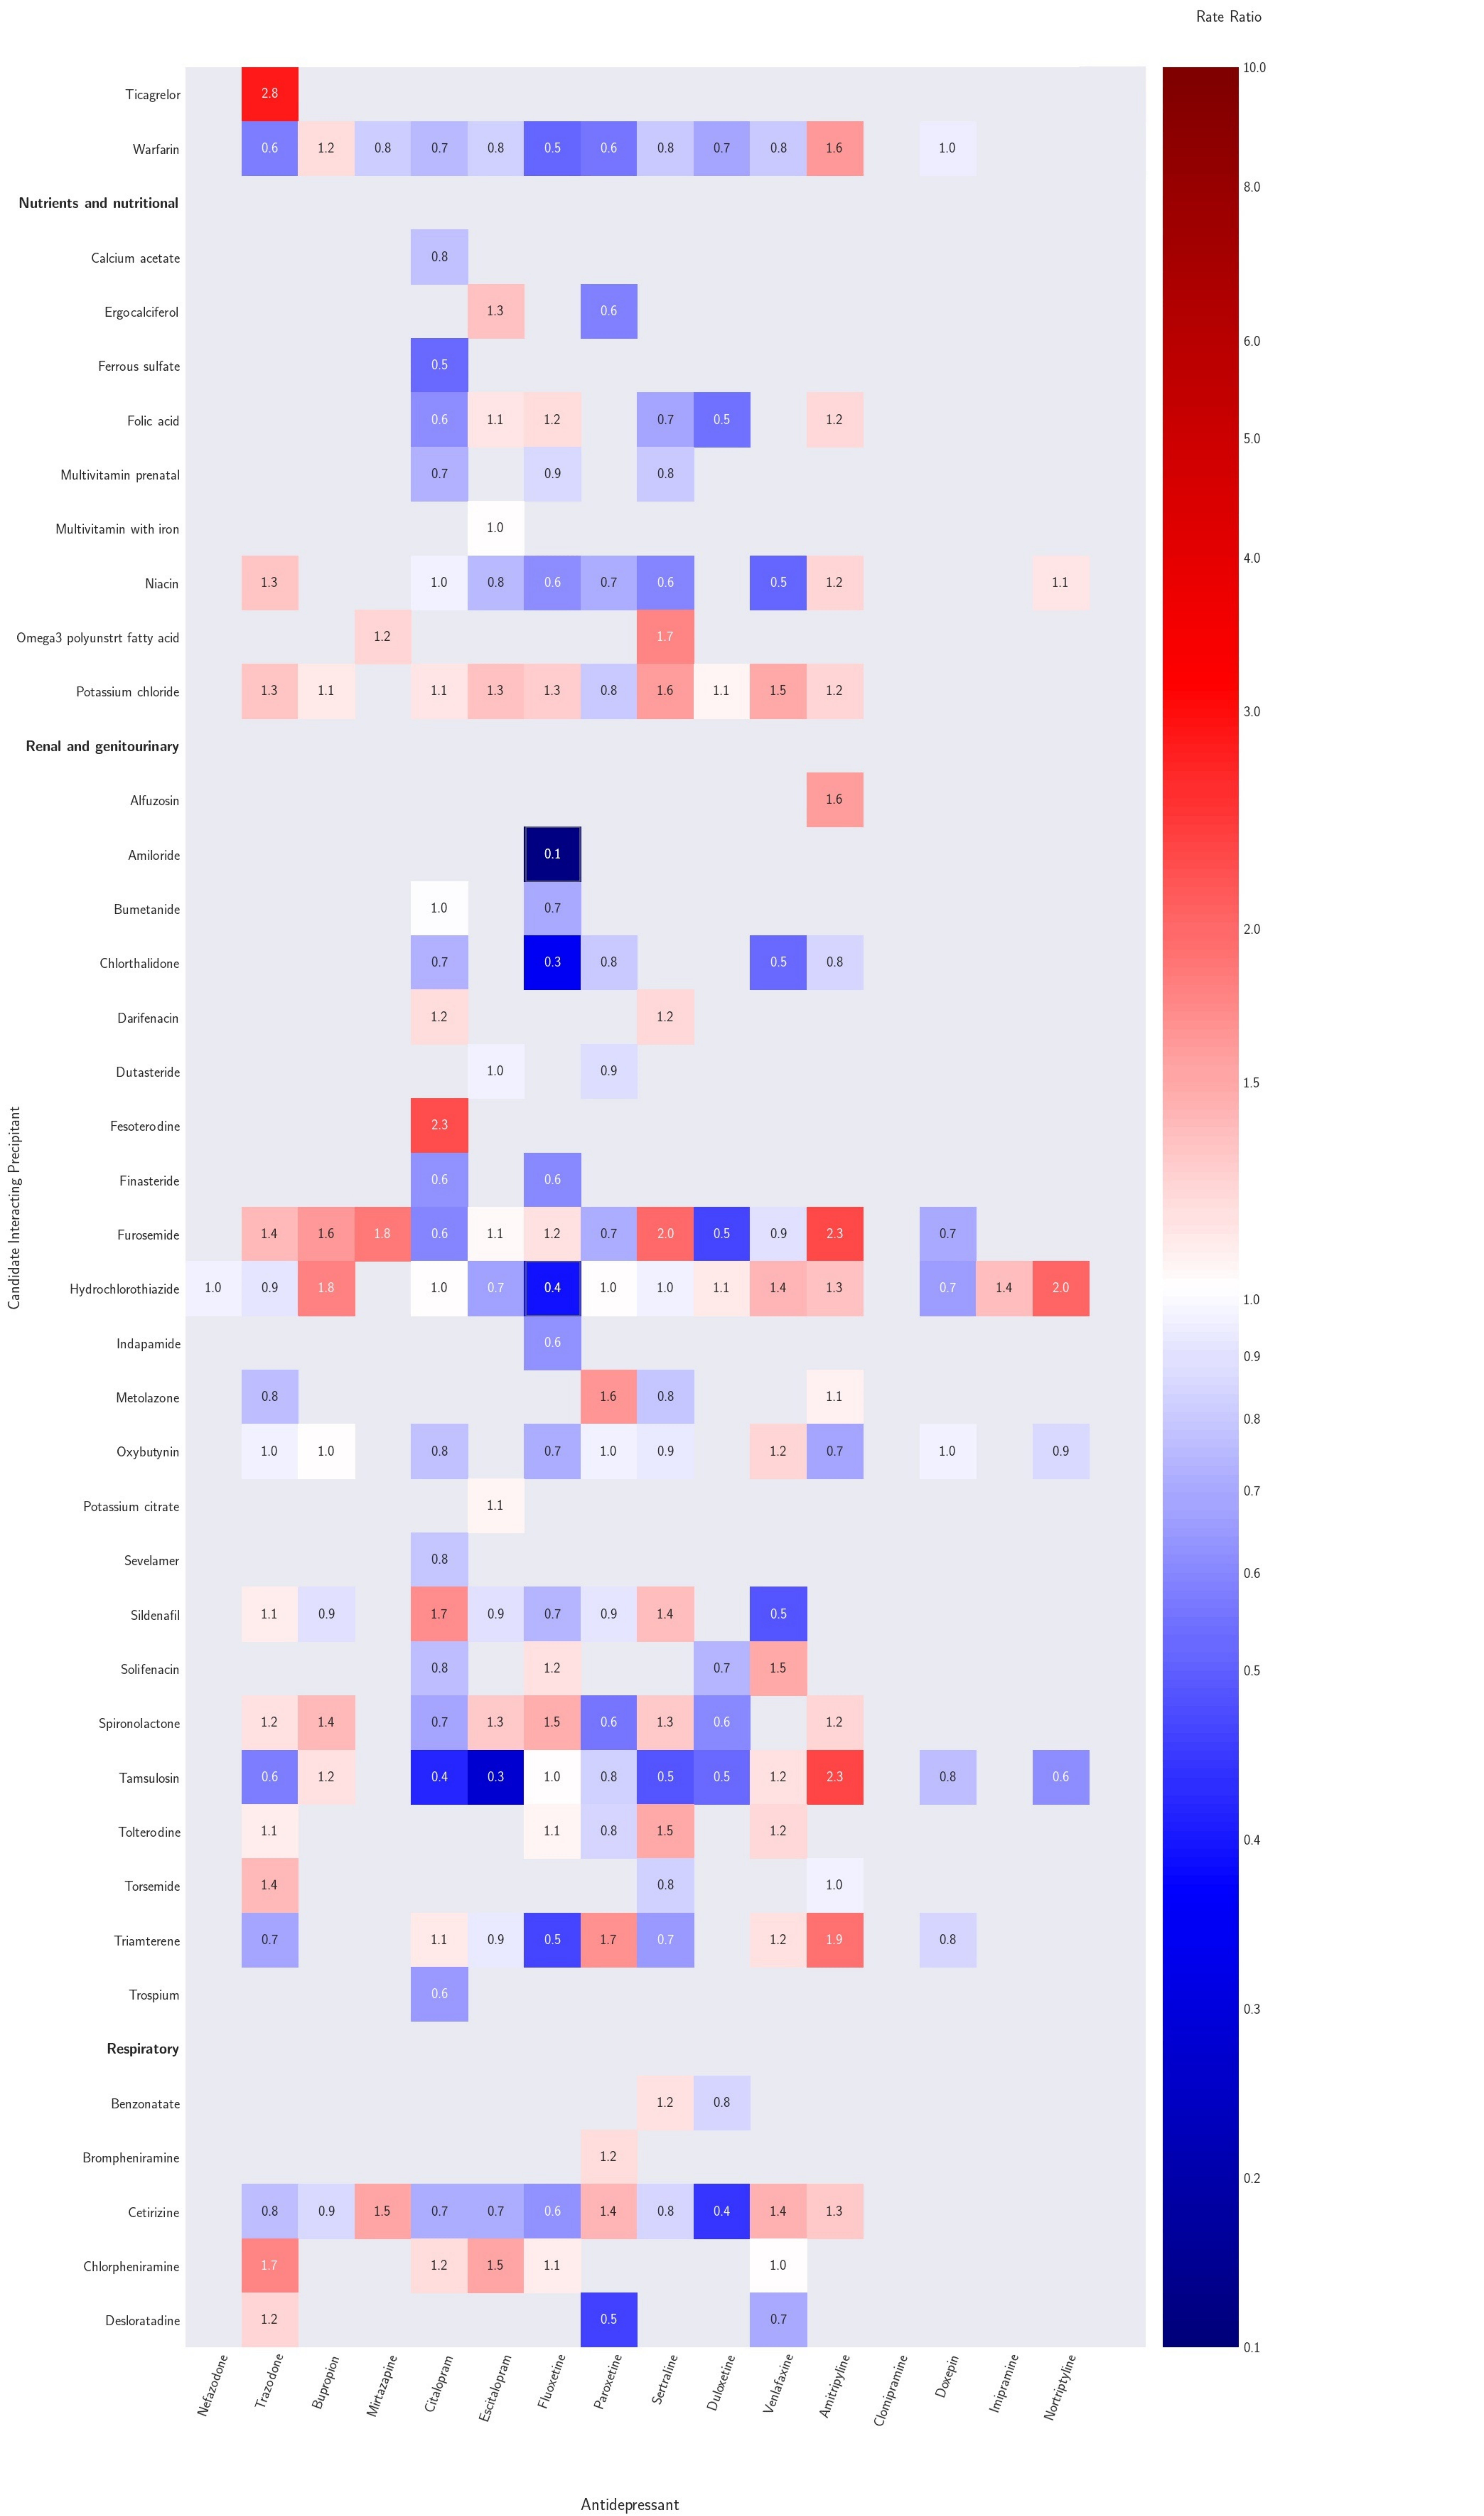



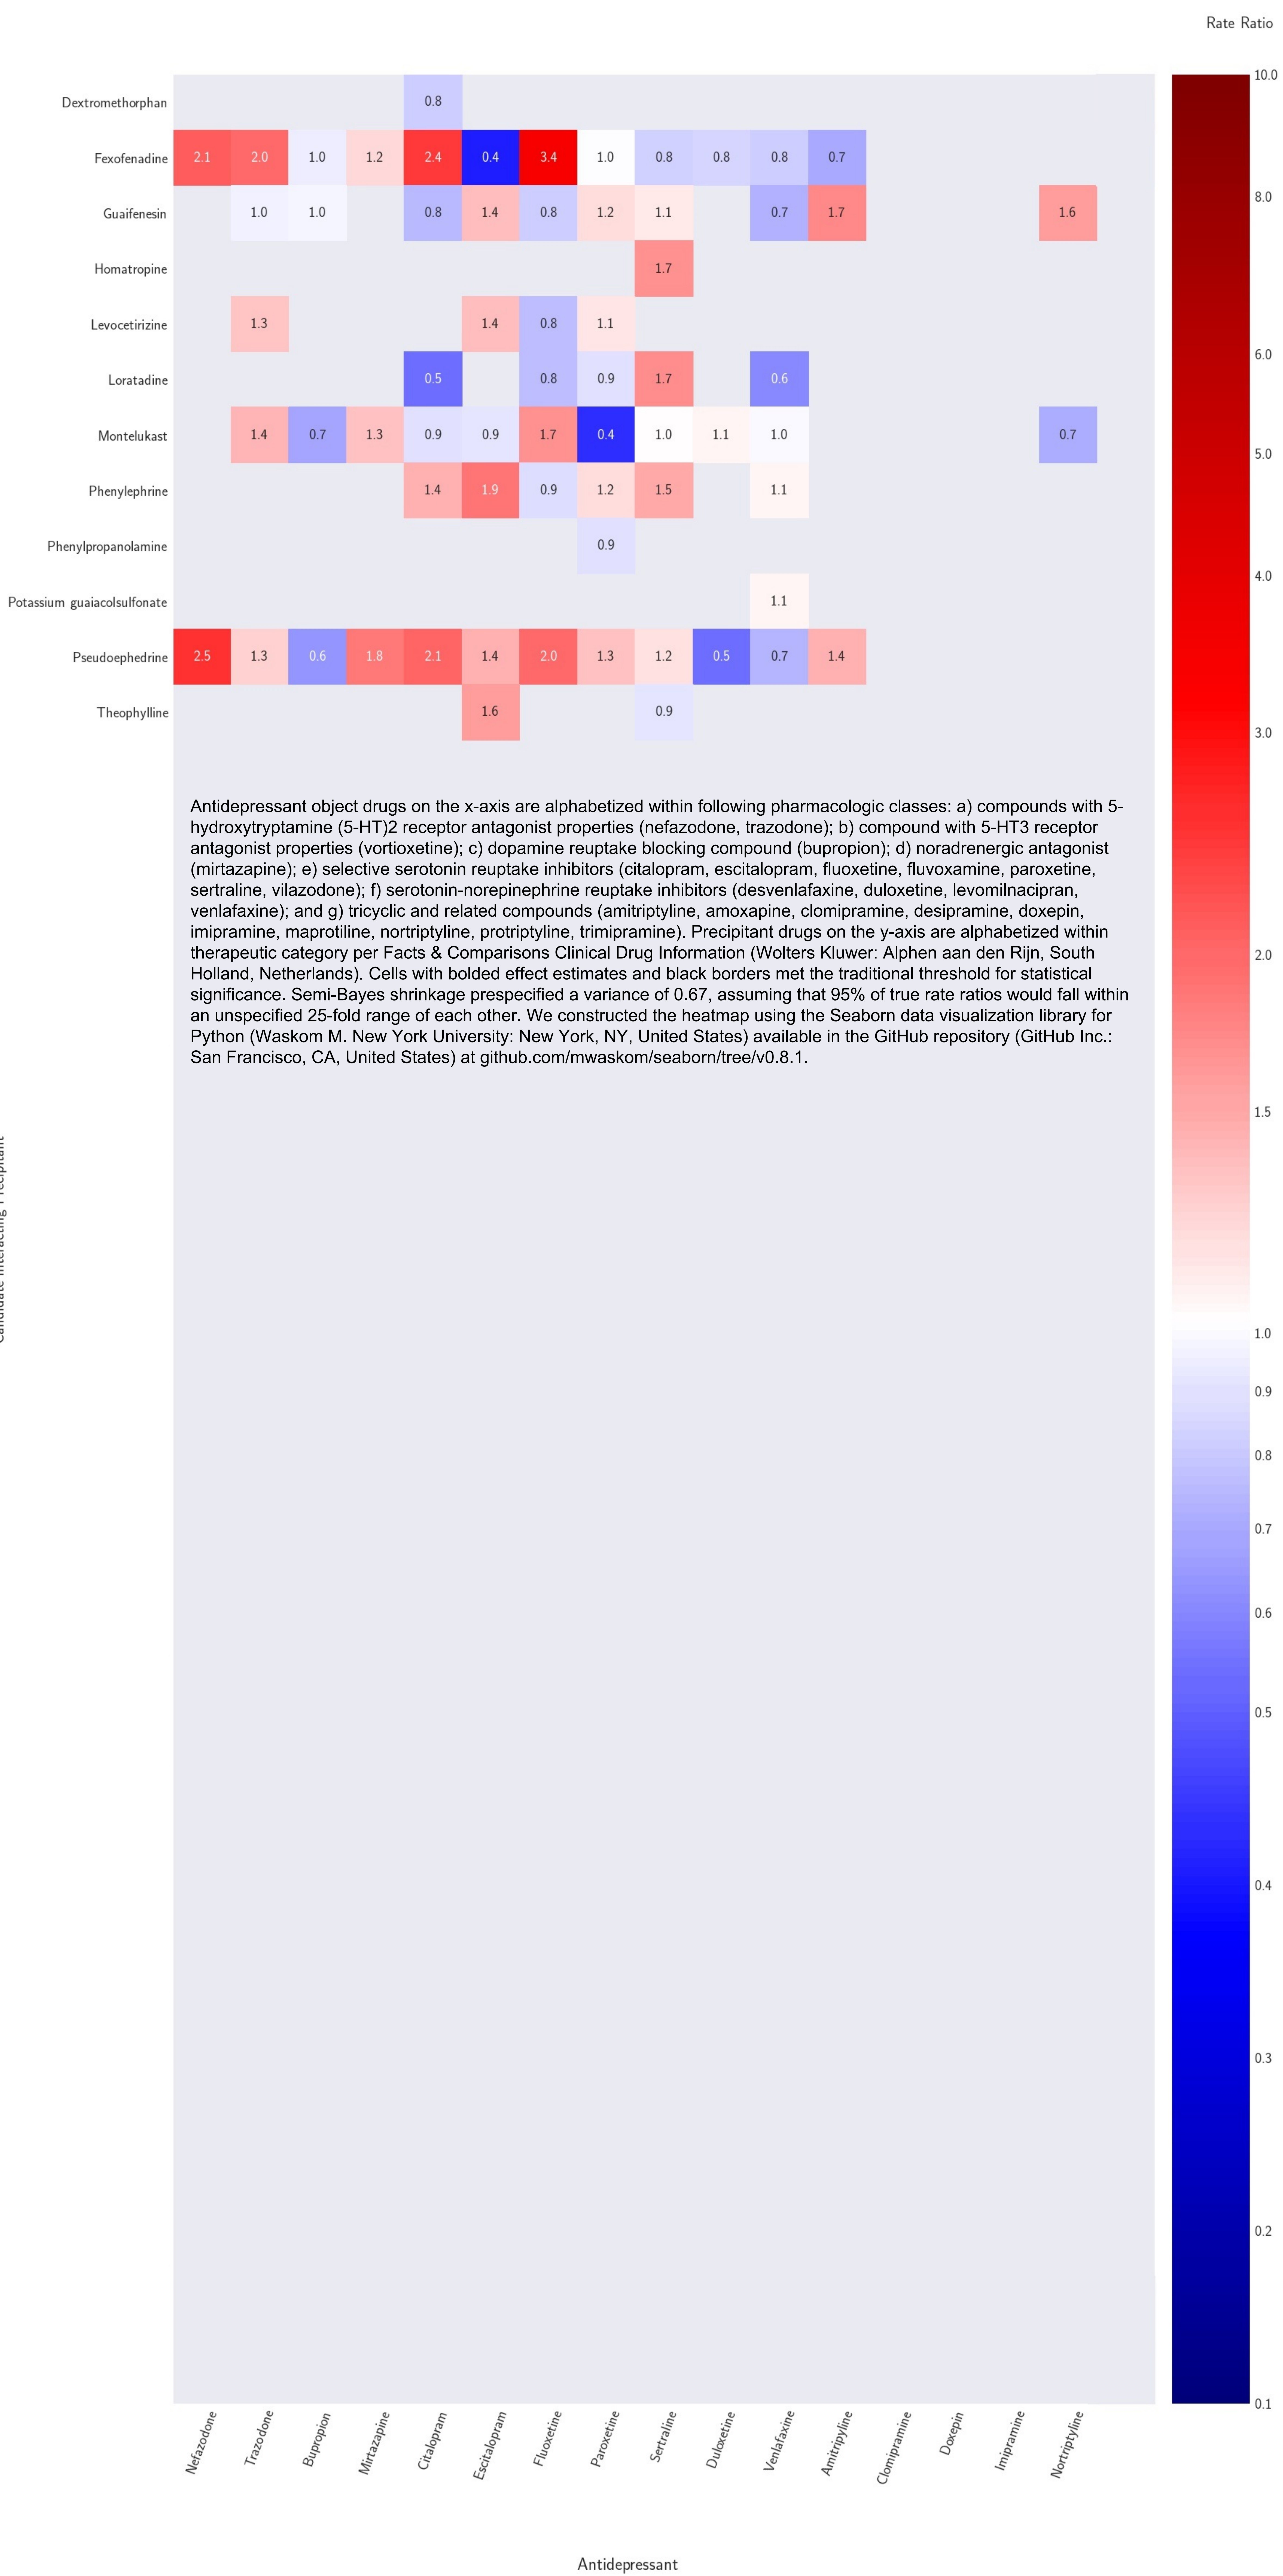

Supplement: NIHMS1674792-supplement-FIG_S2C.pdf [file NIHMS1674792-supplement-FIG_S2C.pdf]
