# Supplementary material
Source: PubMed Central journal article supplement (PMC8316258)

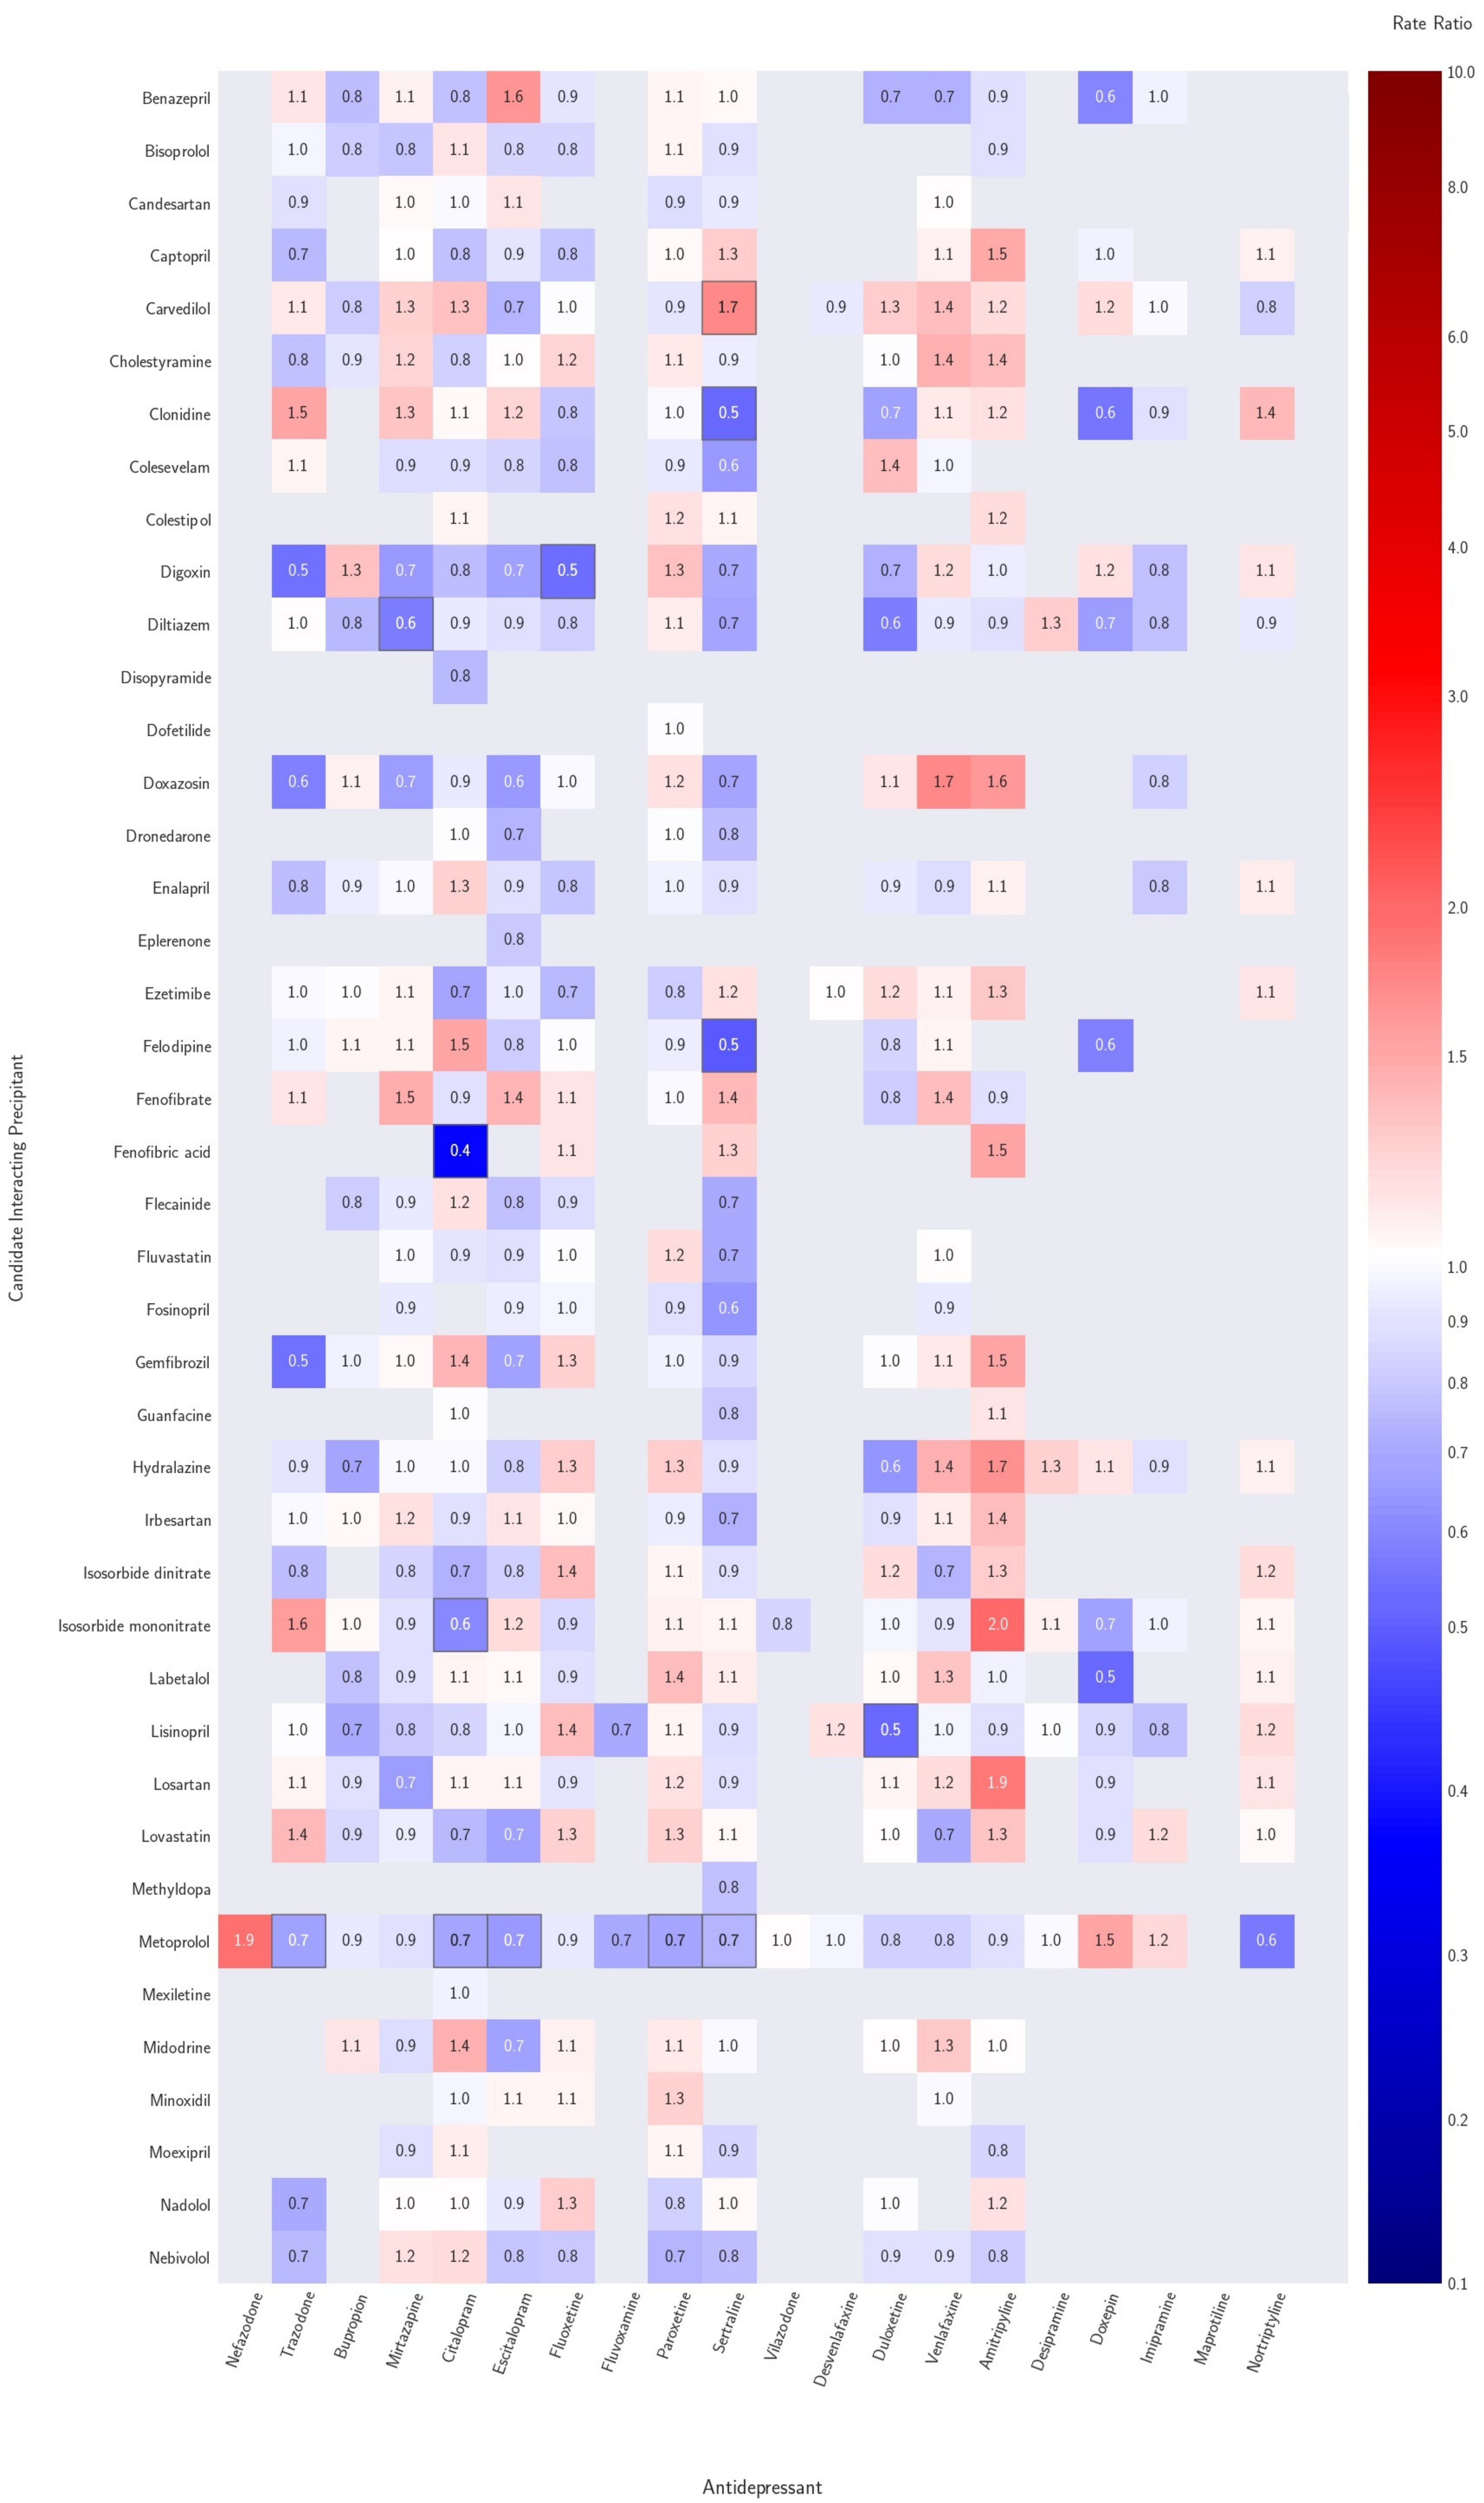







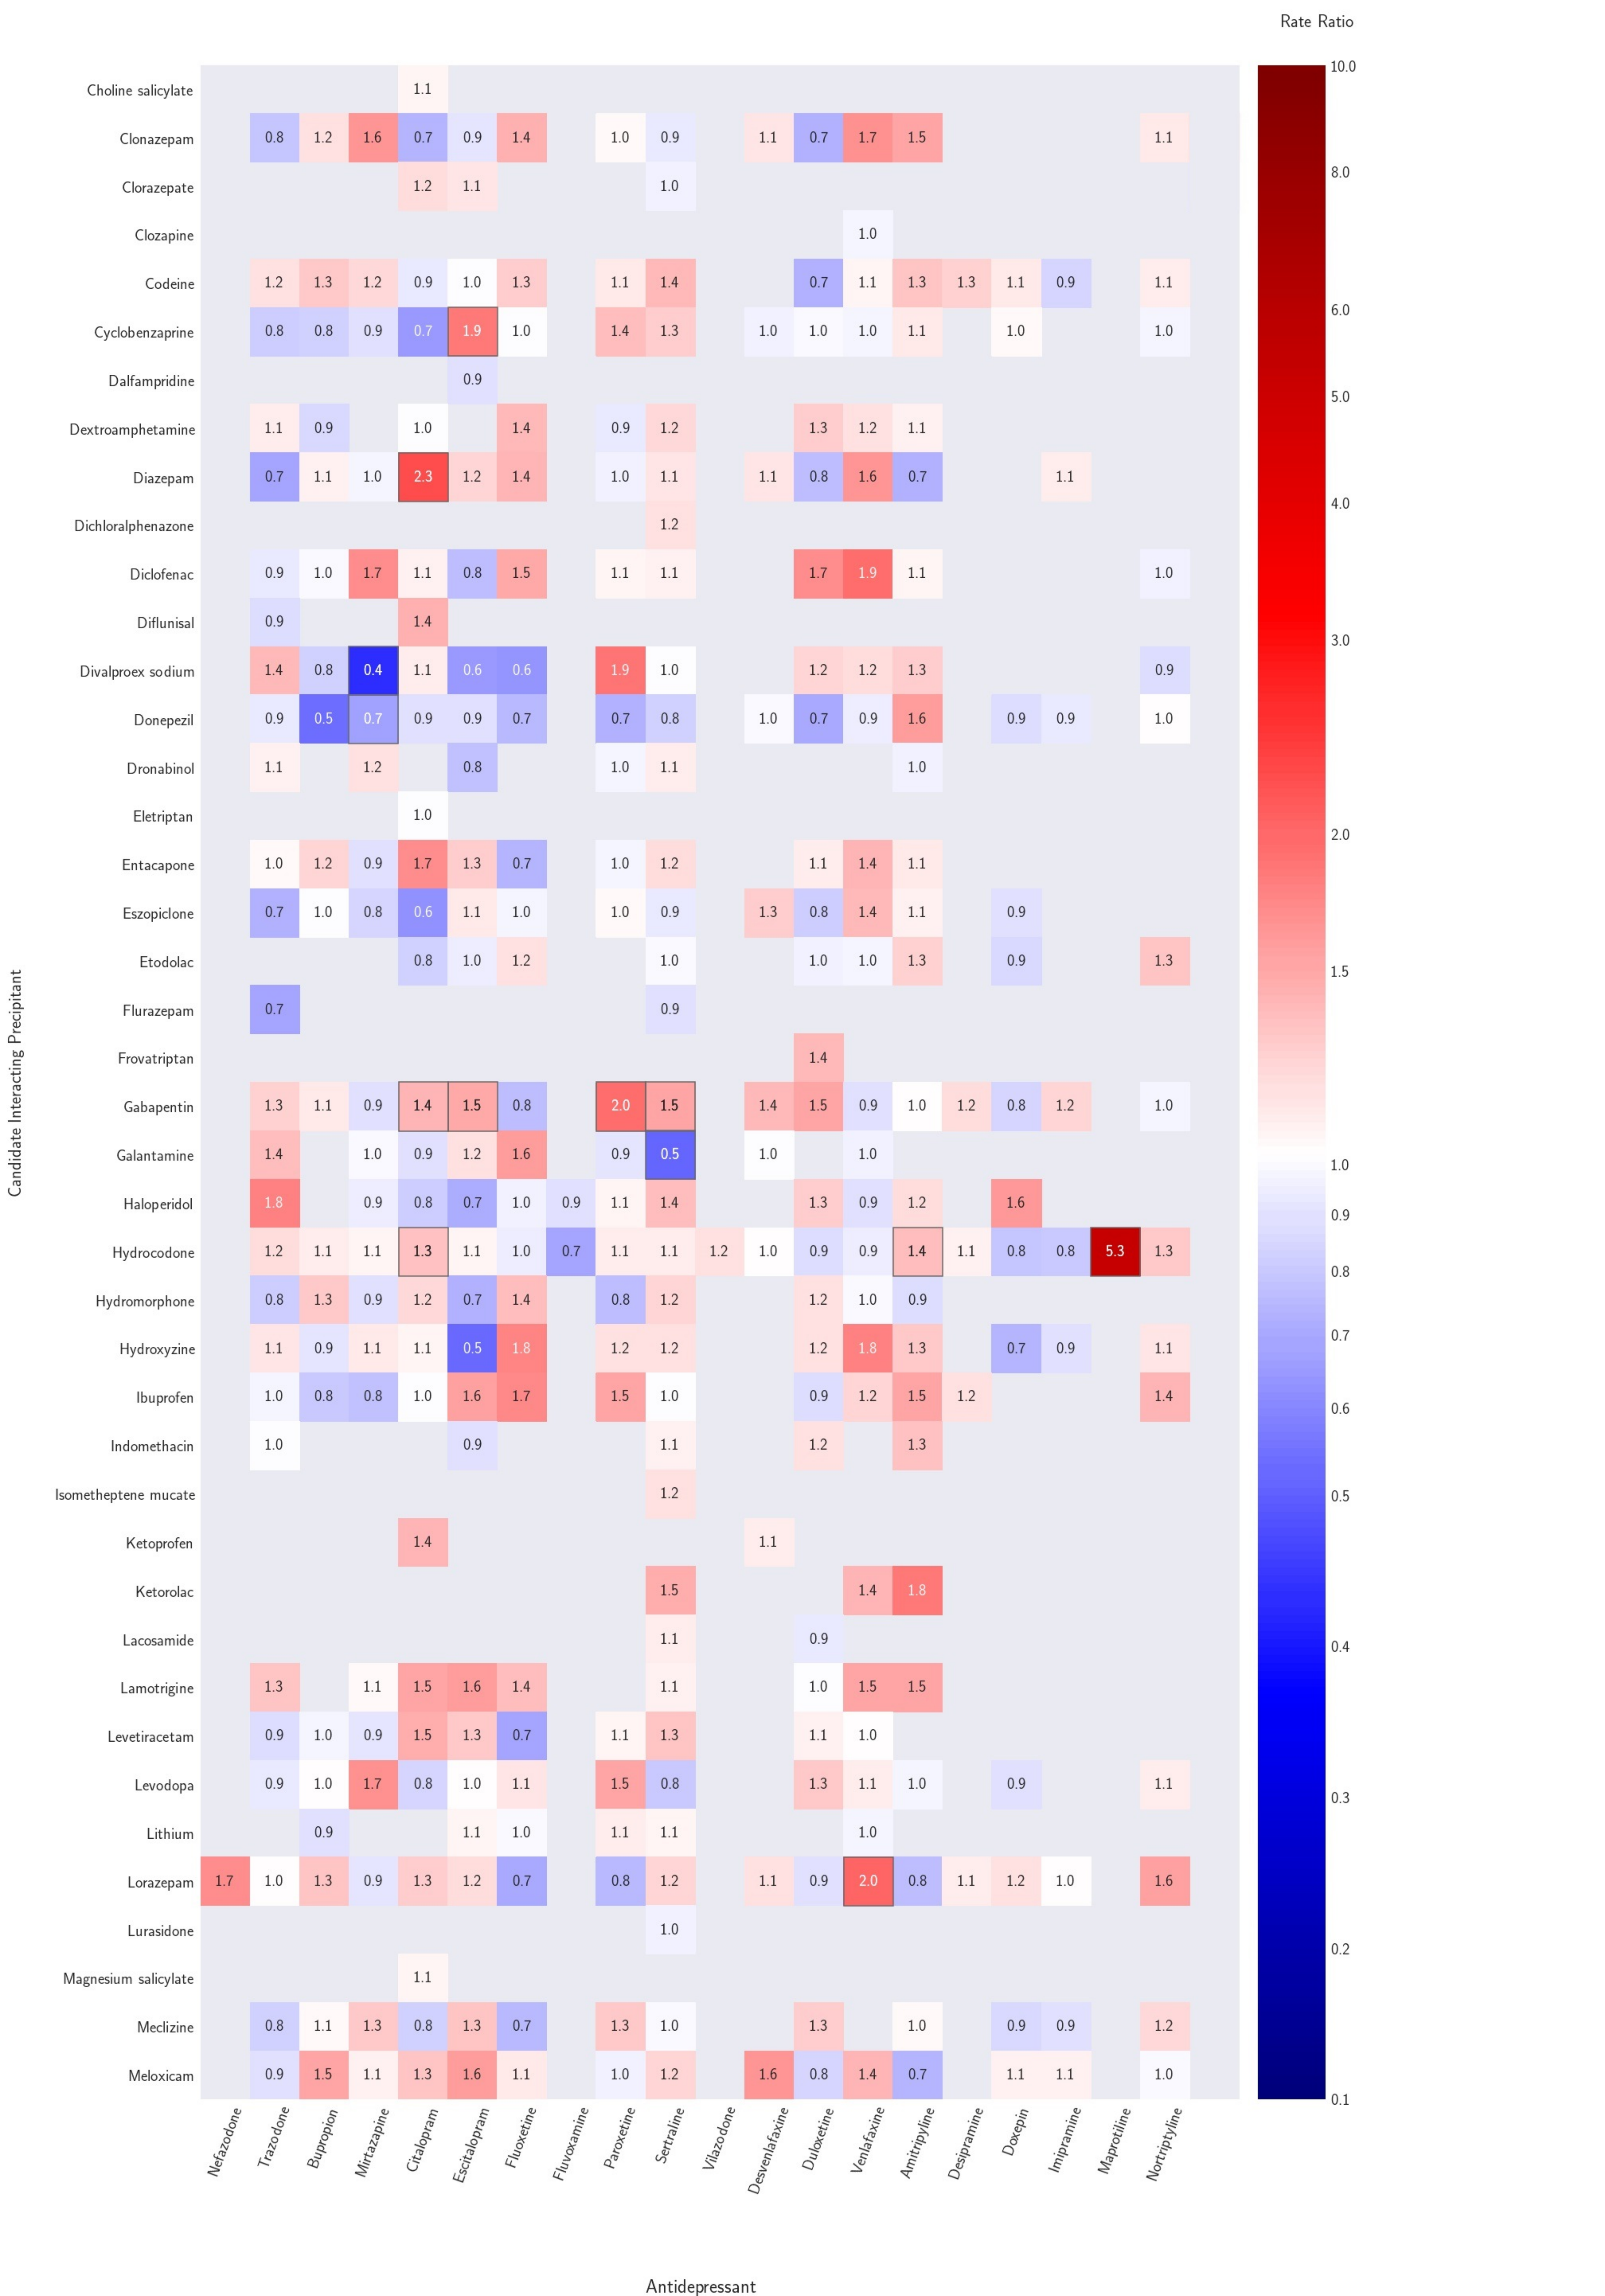







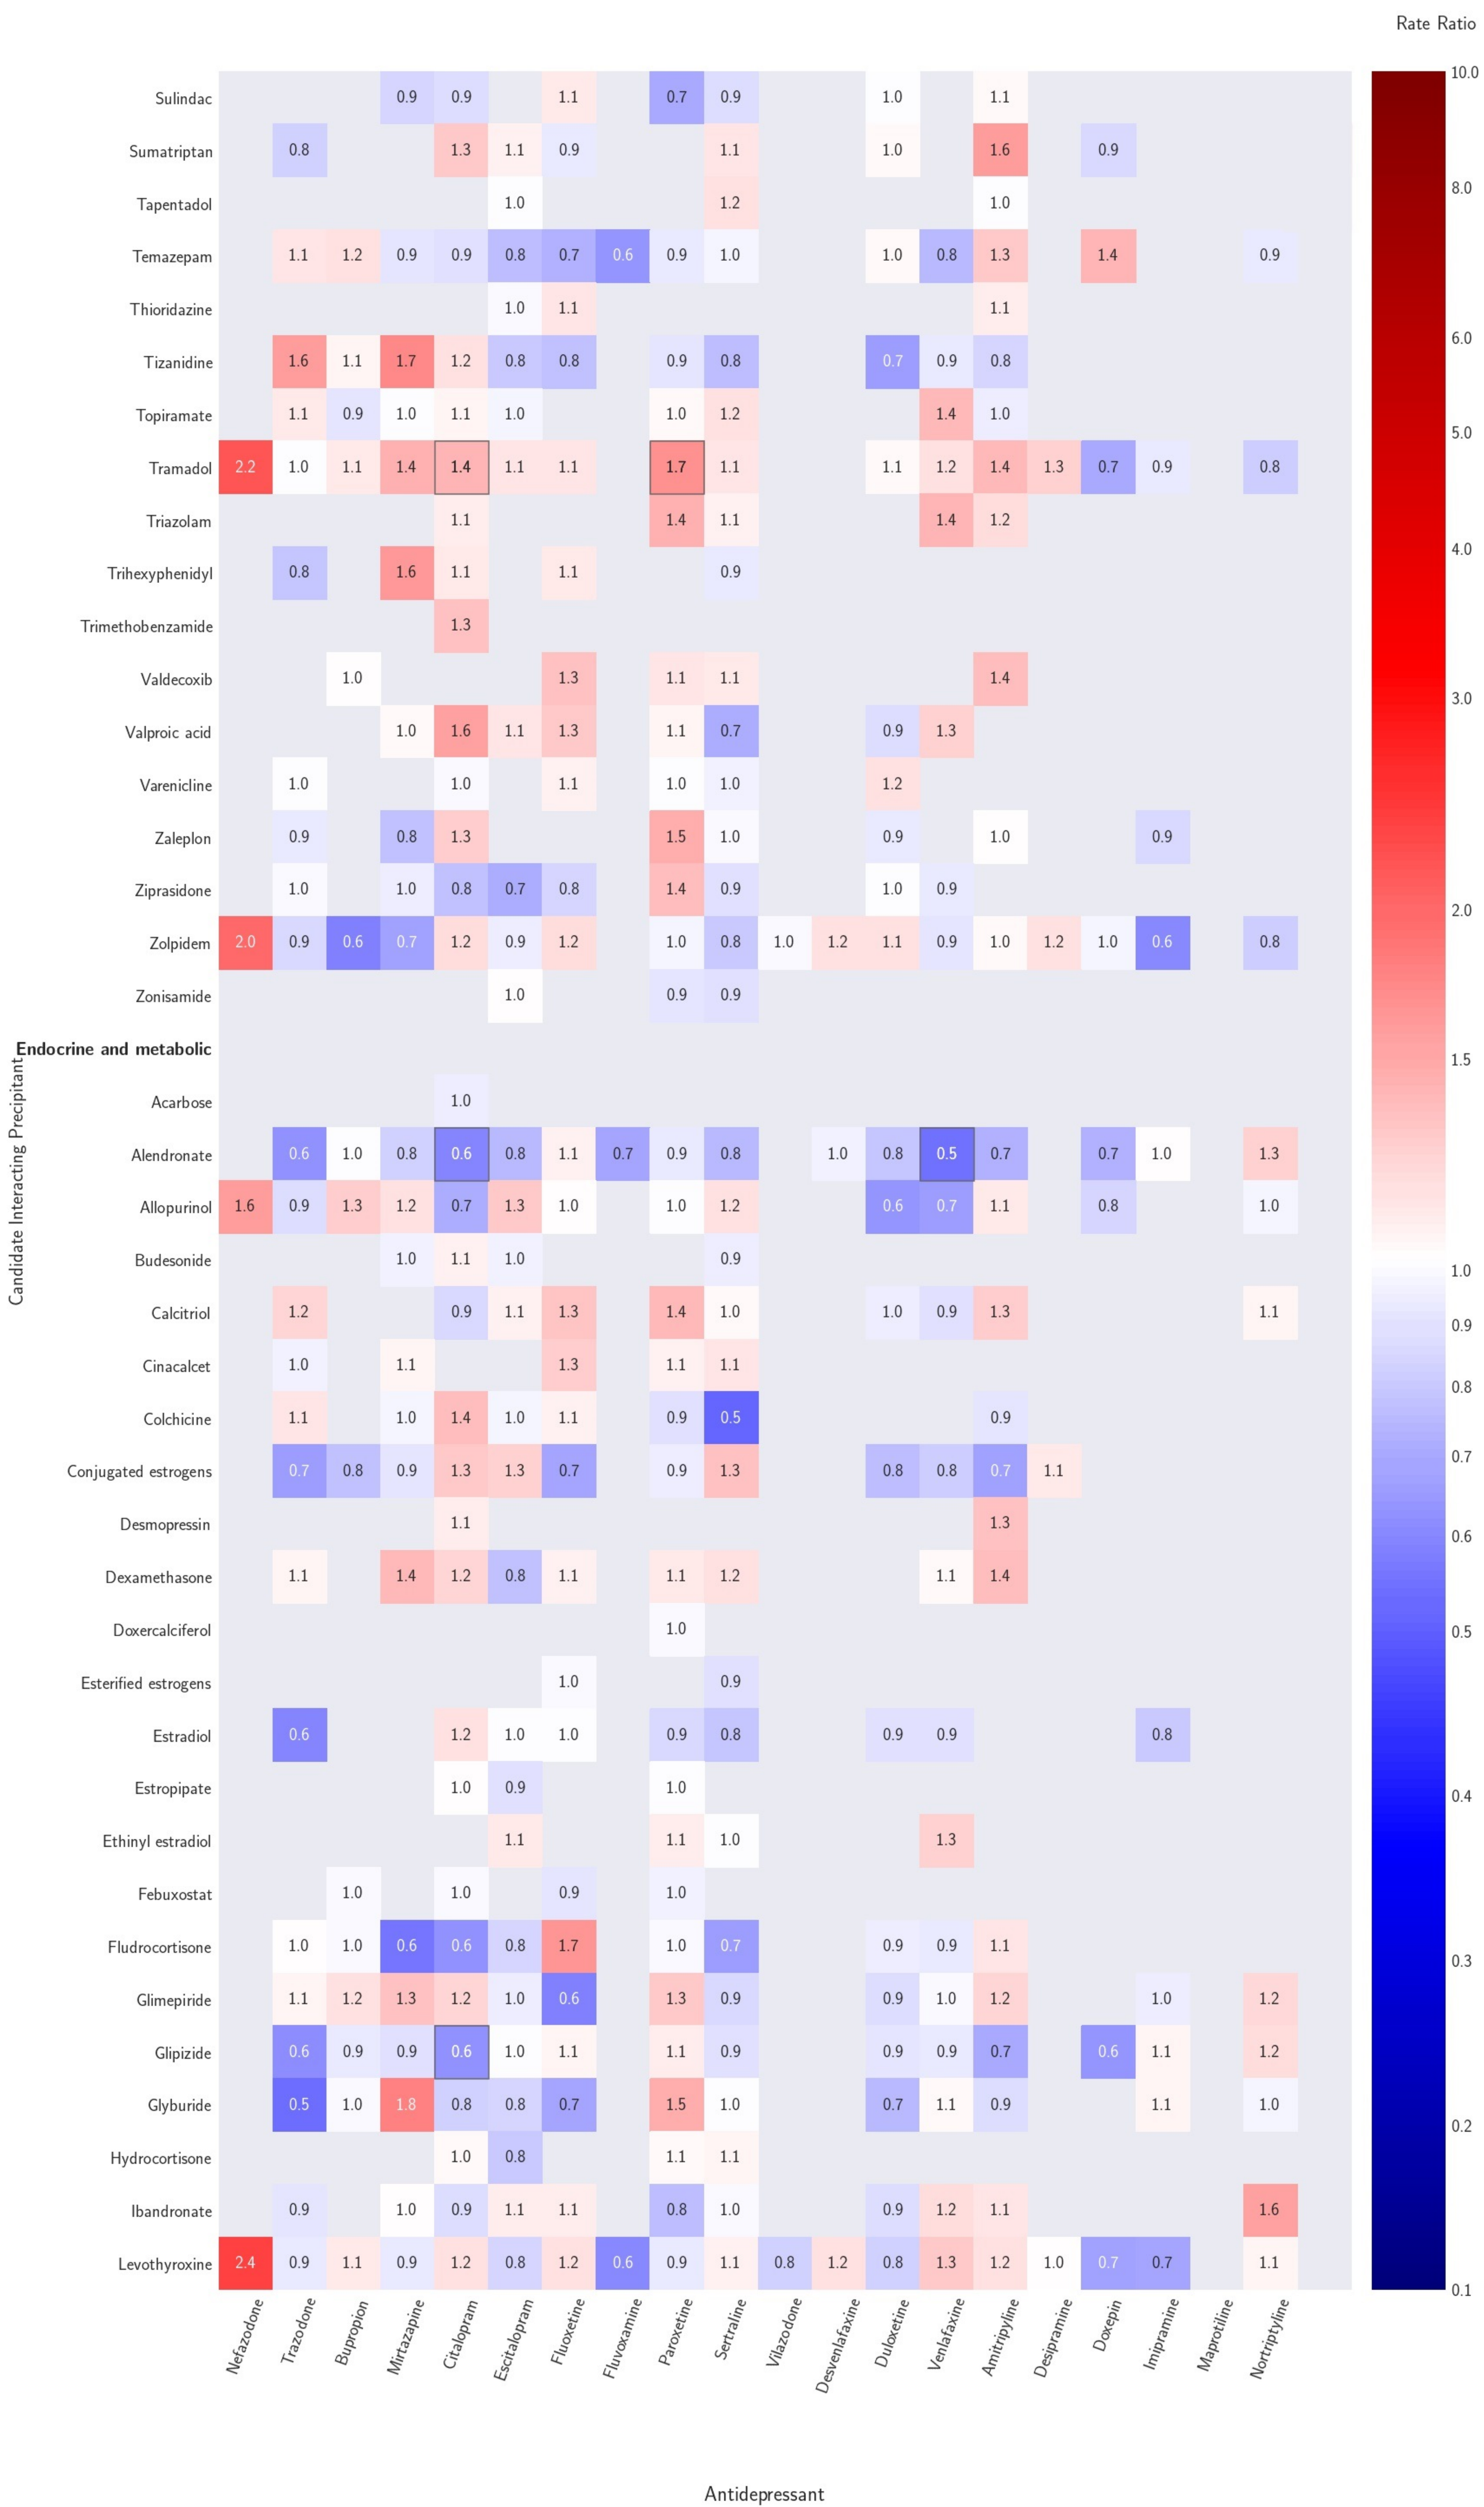



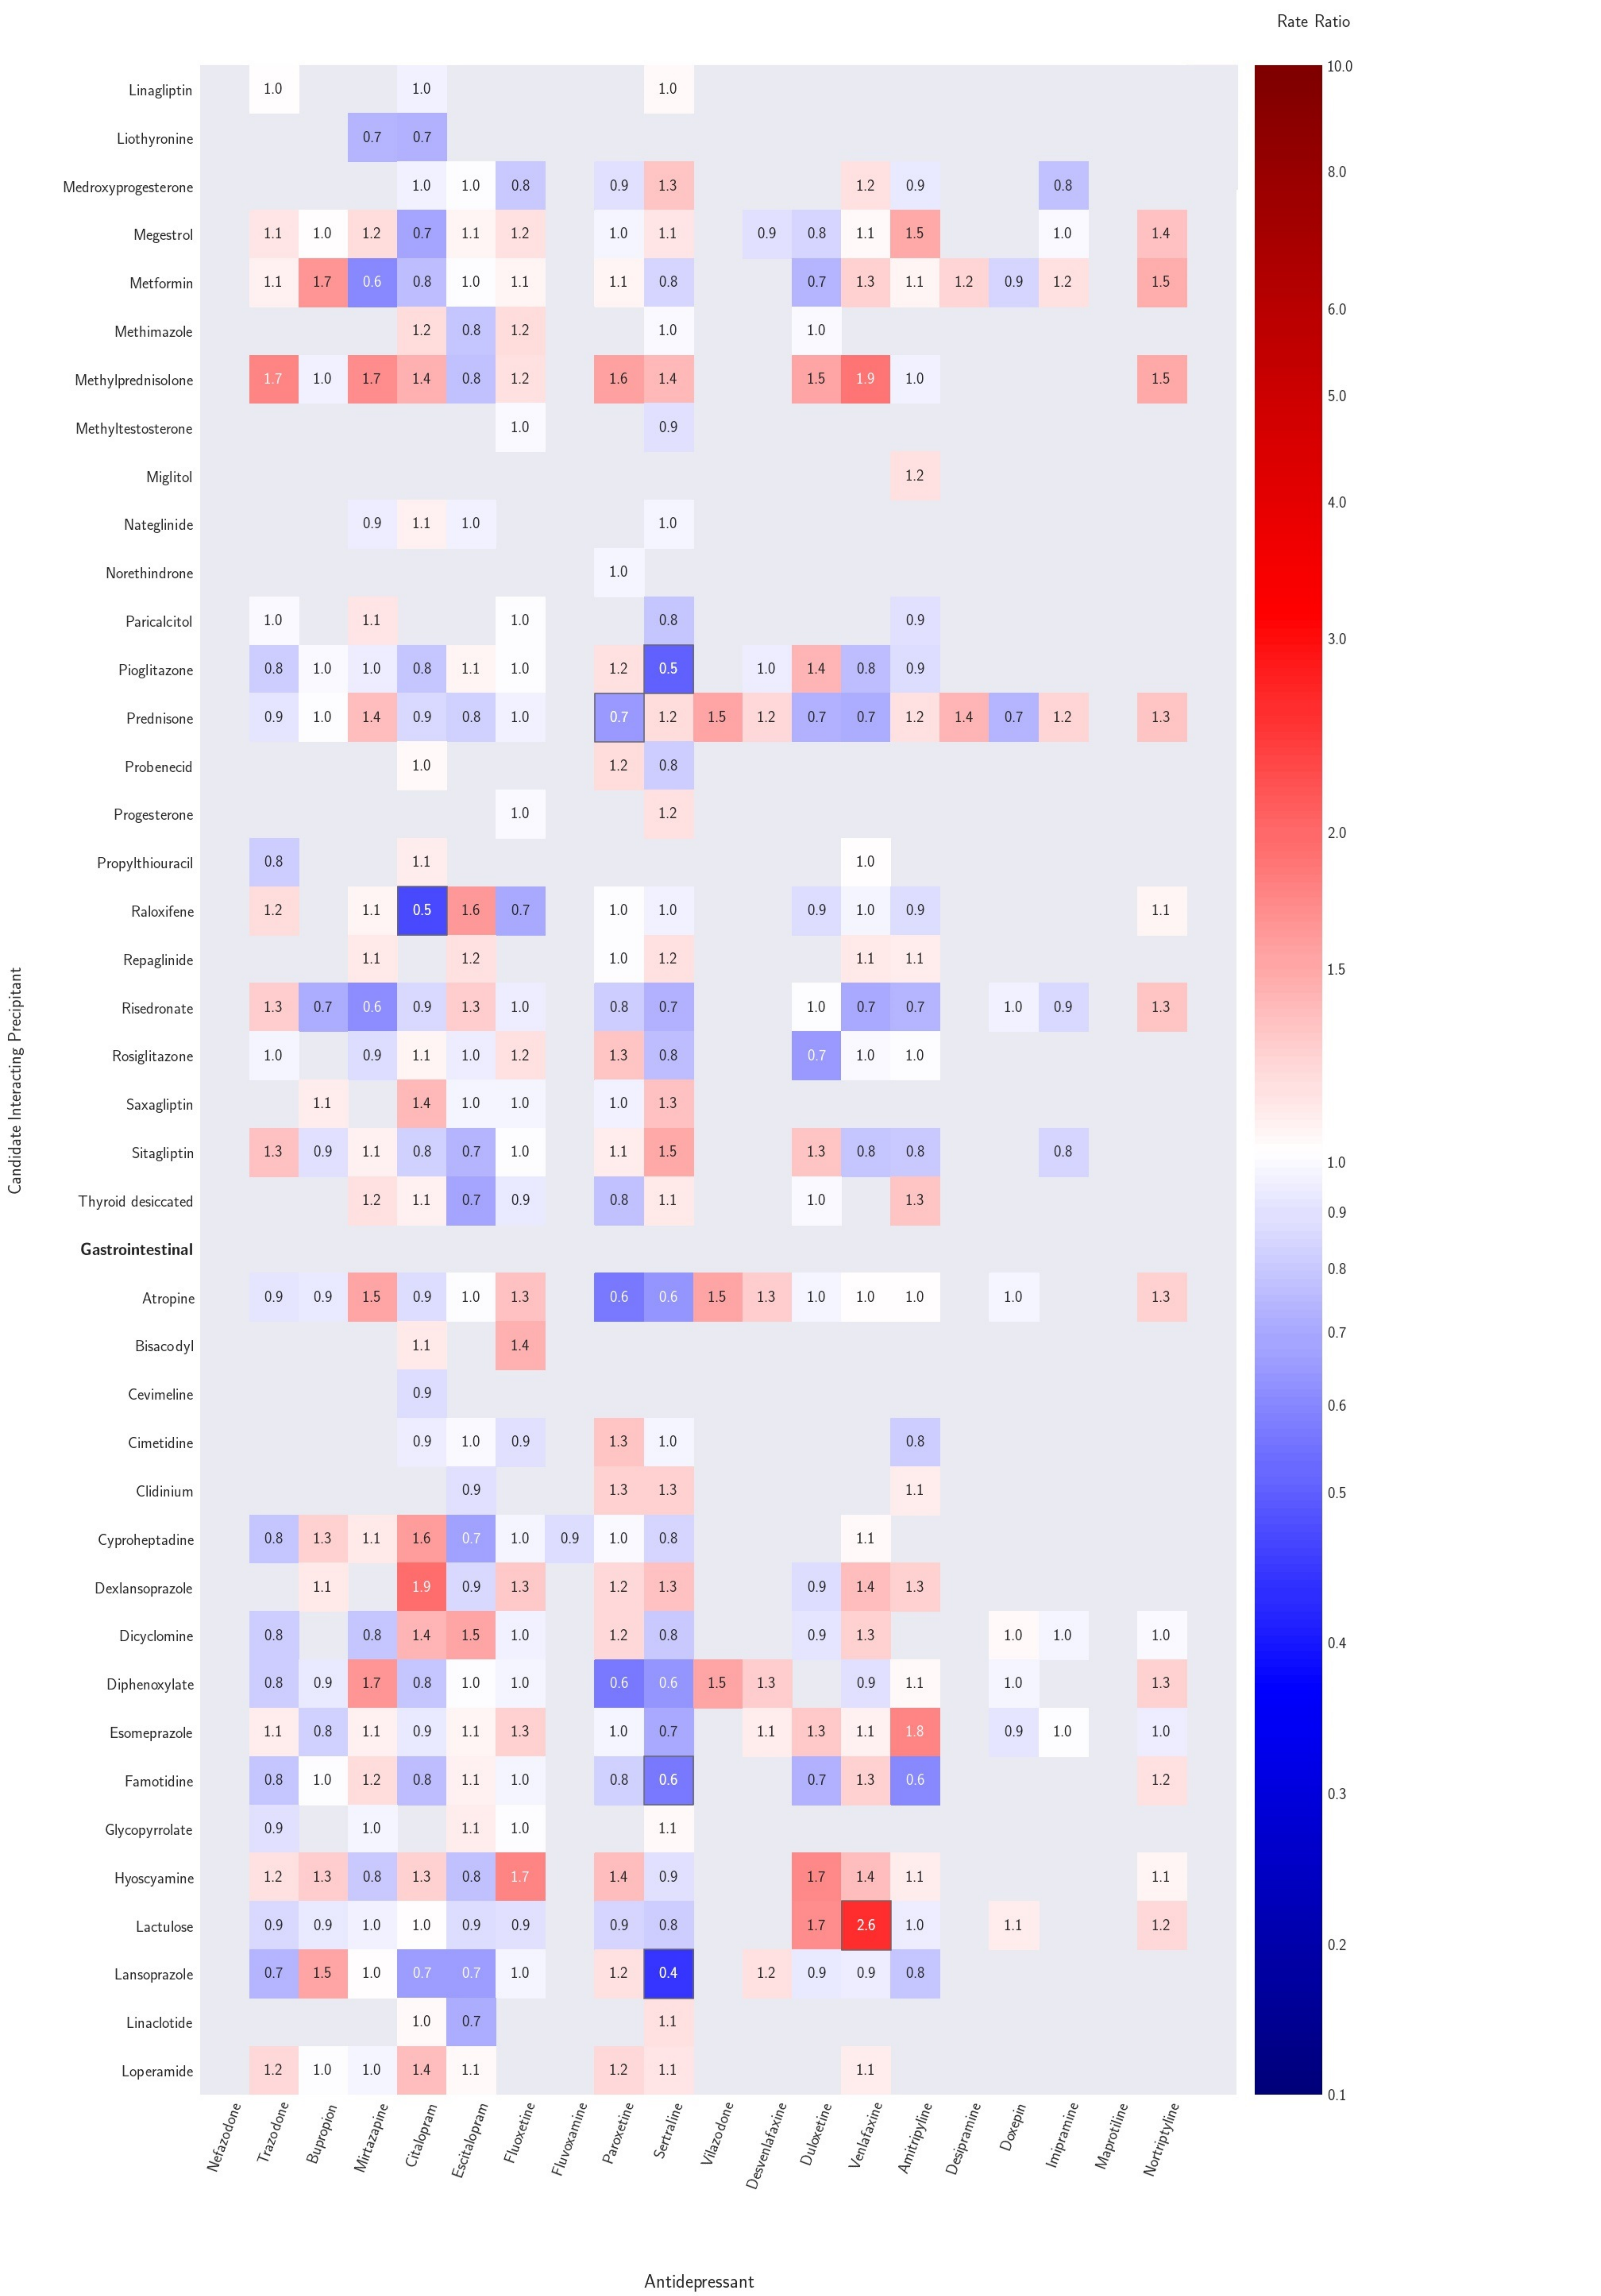



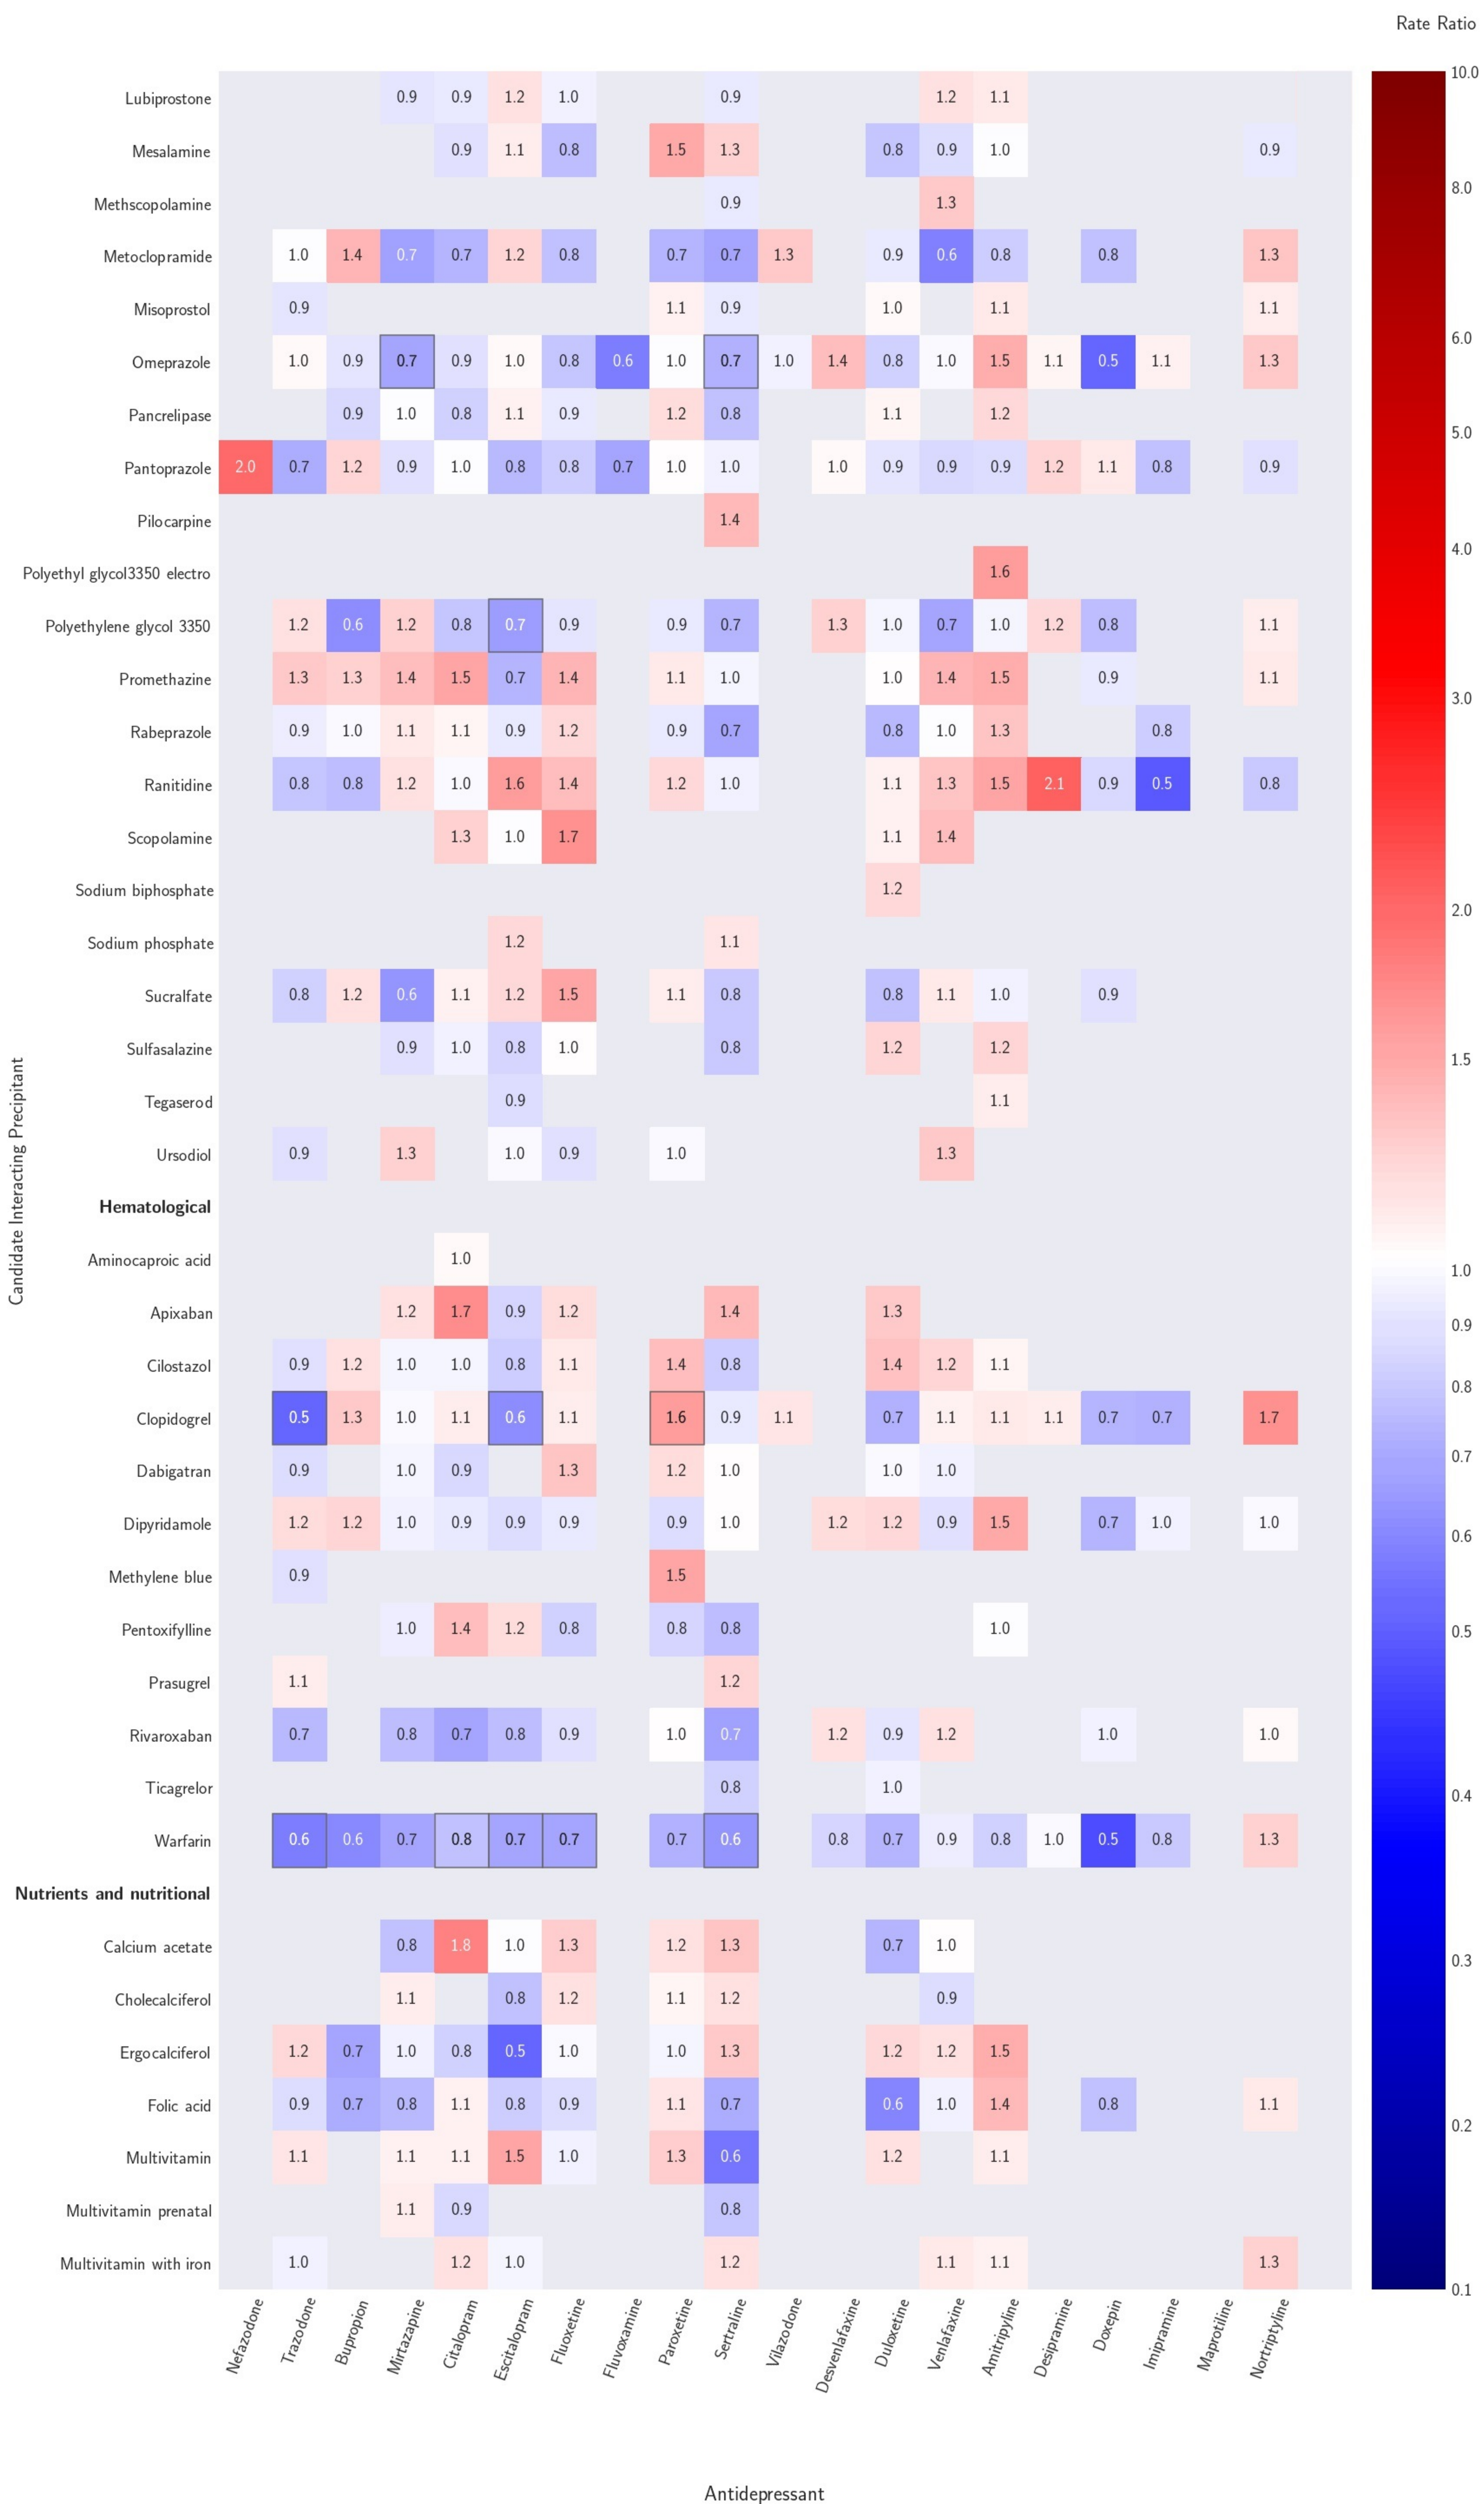







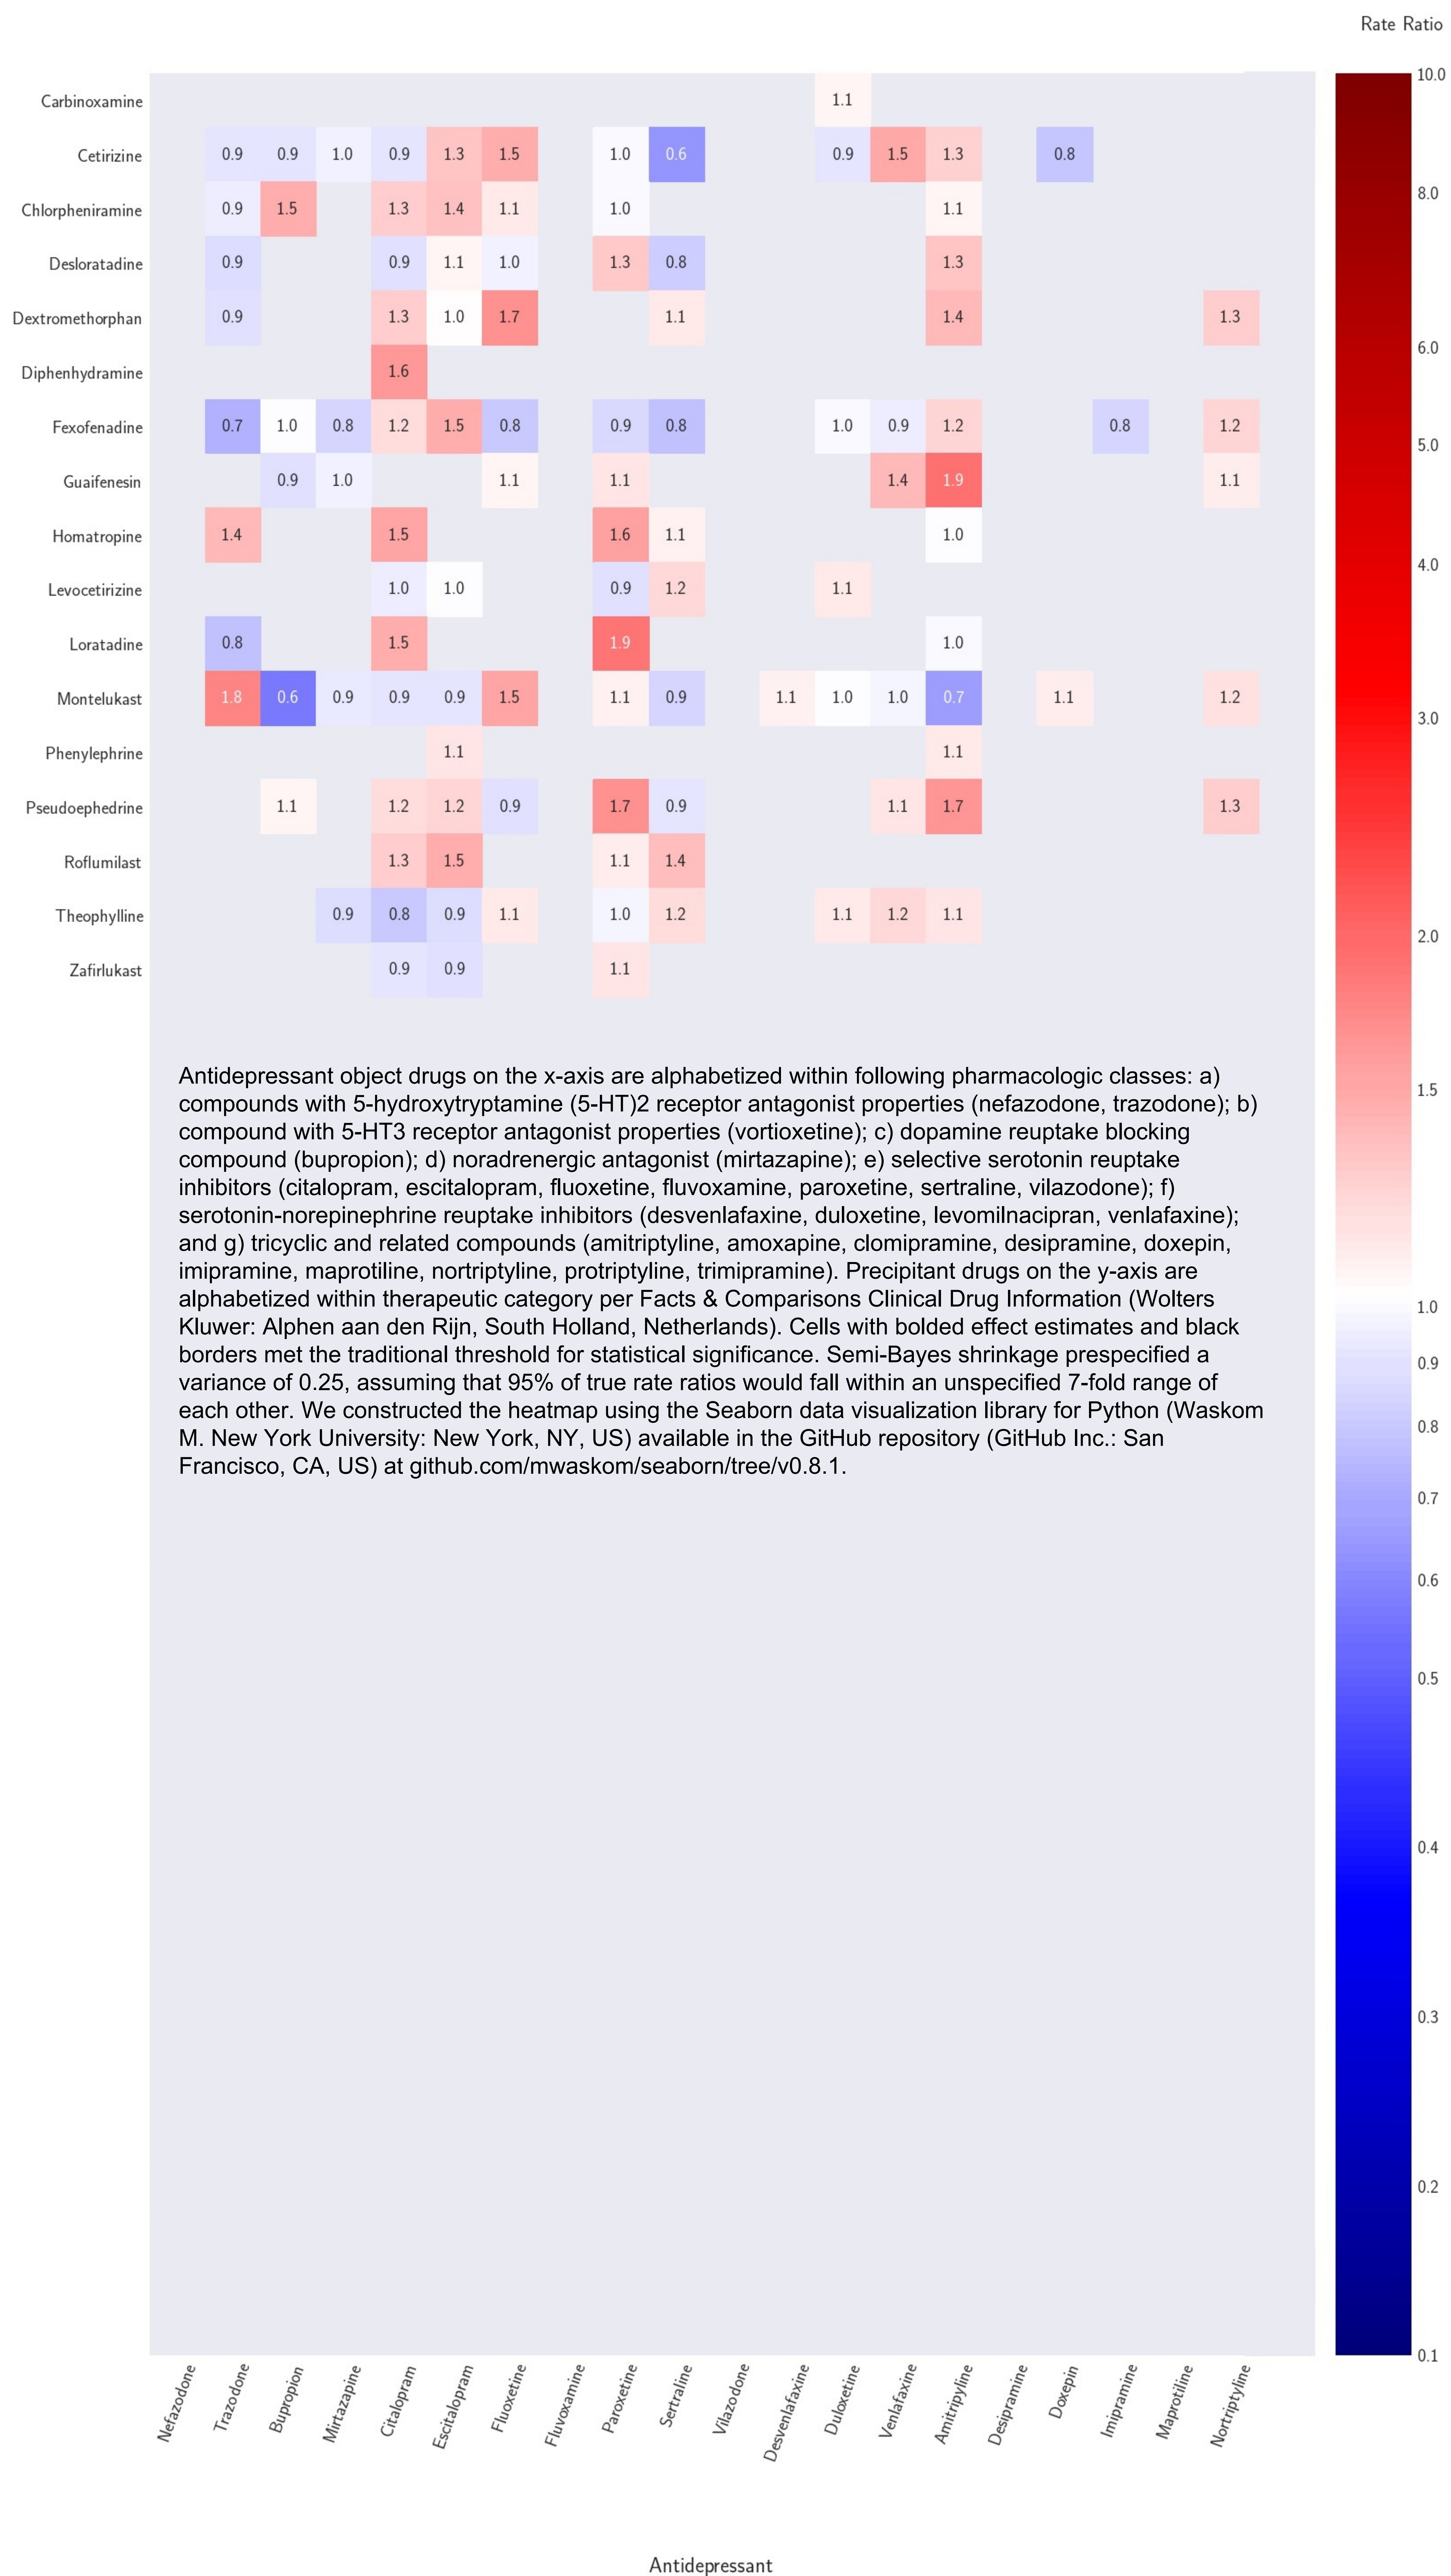

Supplement: NIHMS1674792-supplement-FIG_S1B.pdf [file NIHMS1674792-supplement-FIG_S1B.pdf]

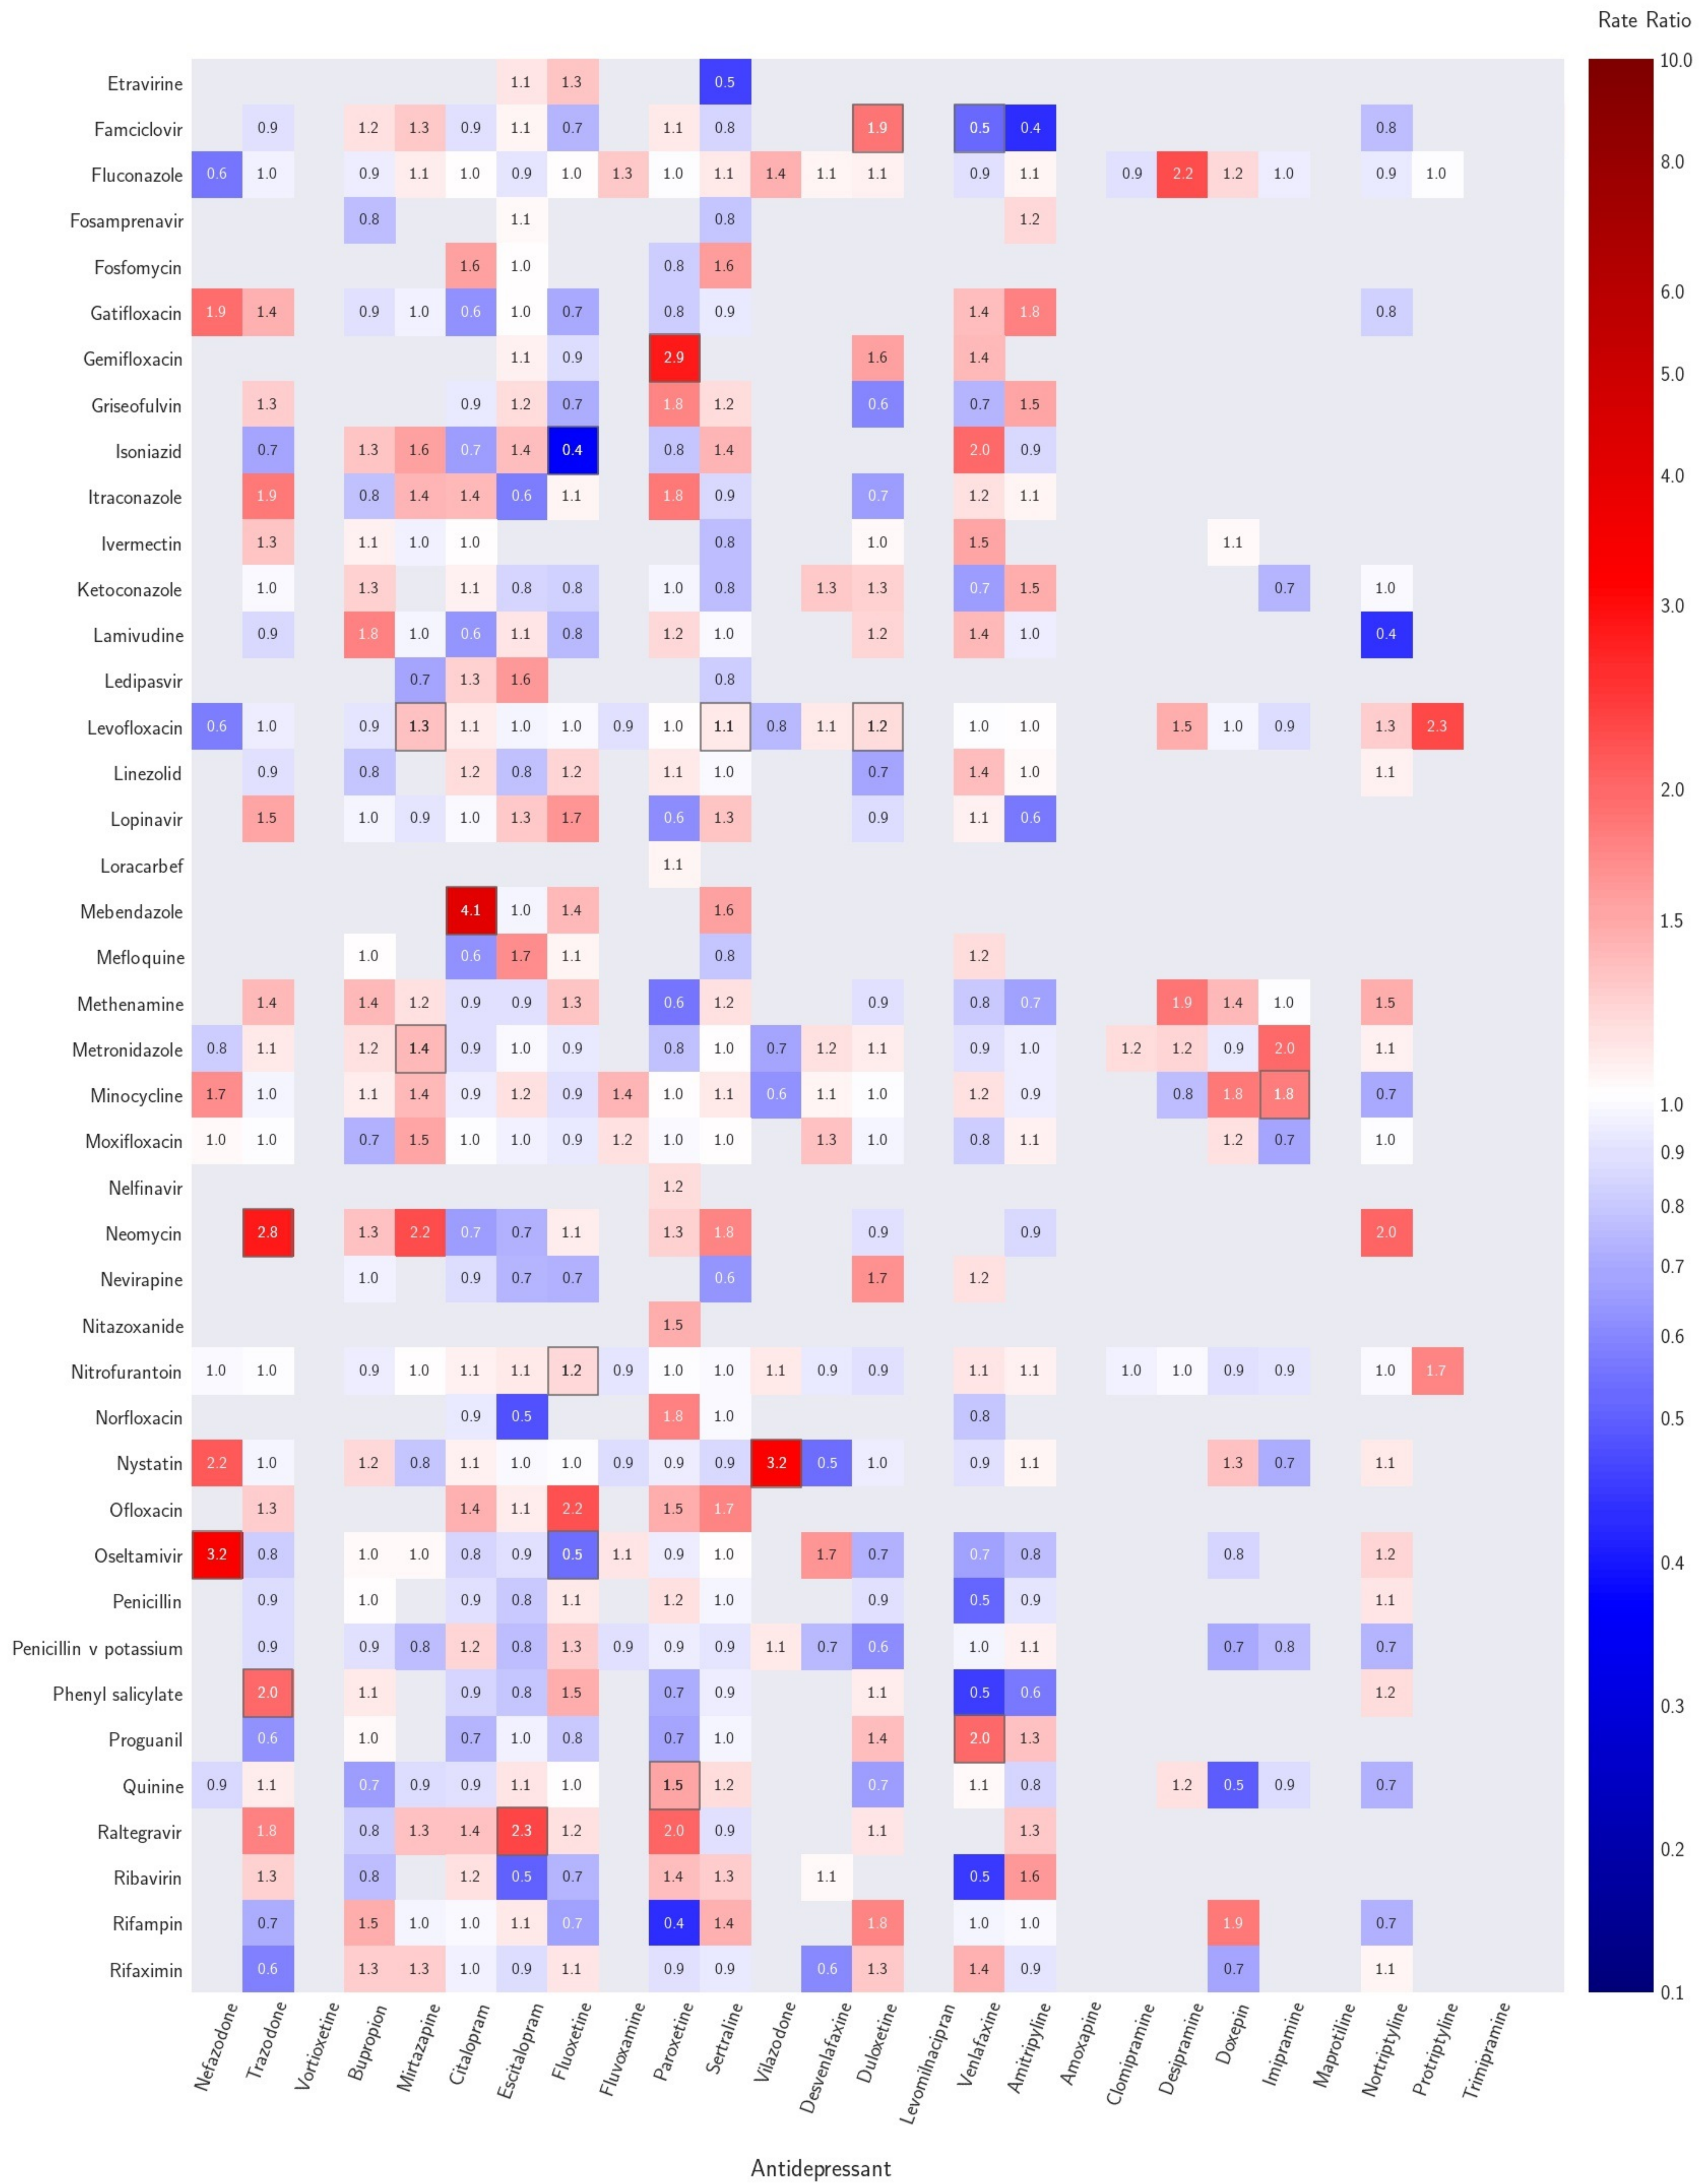



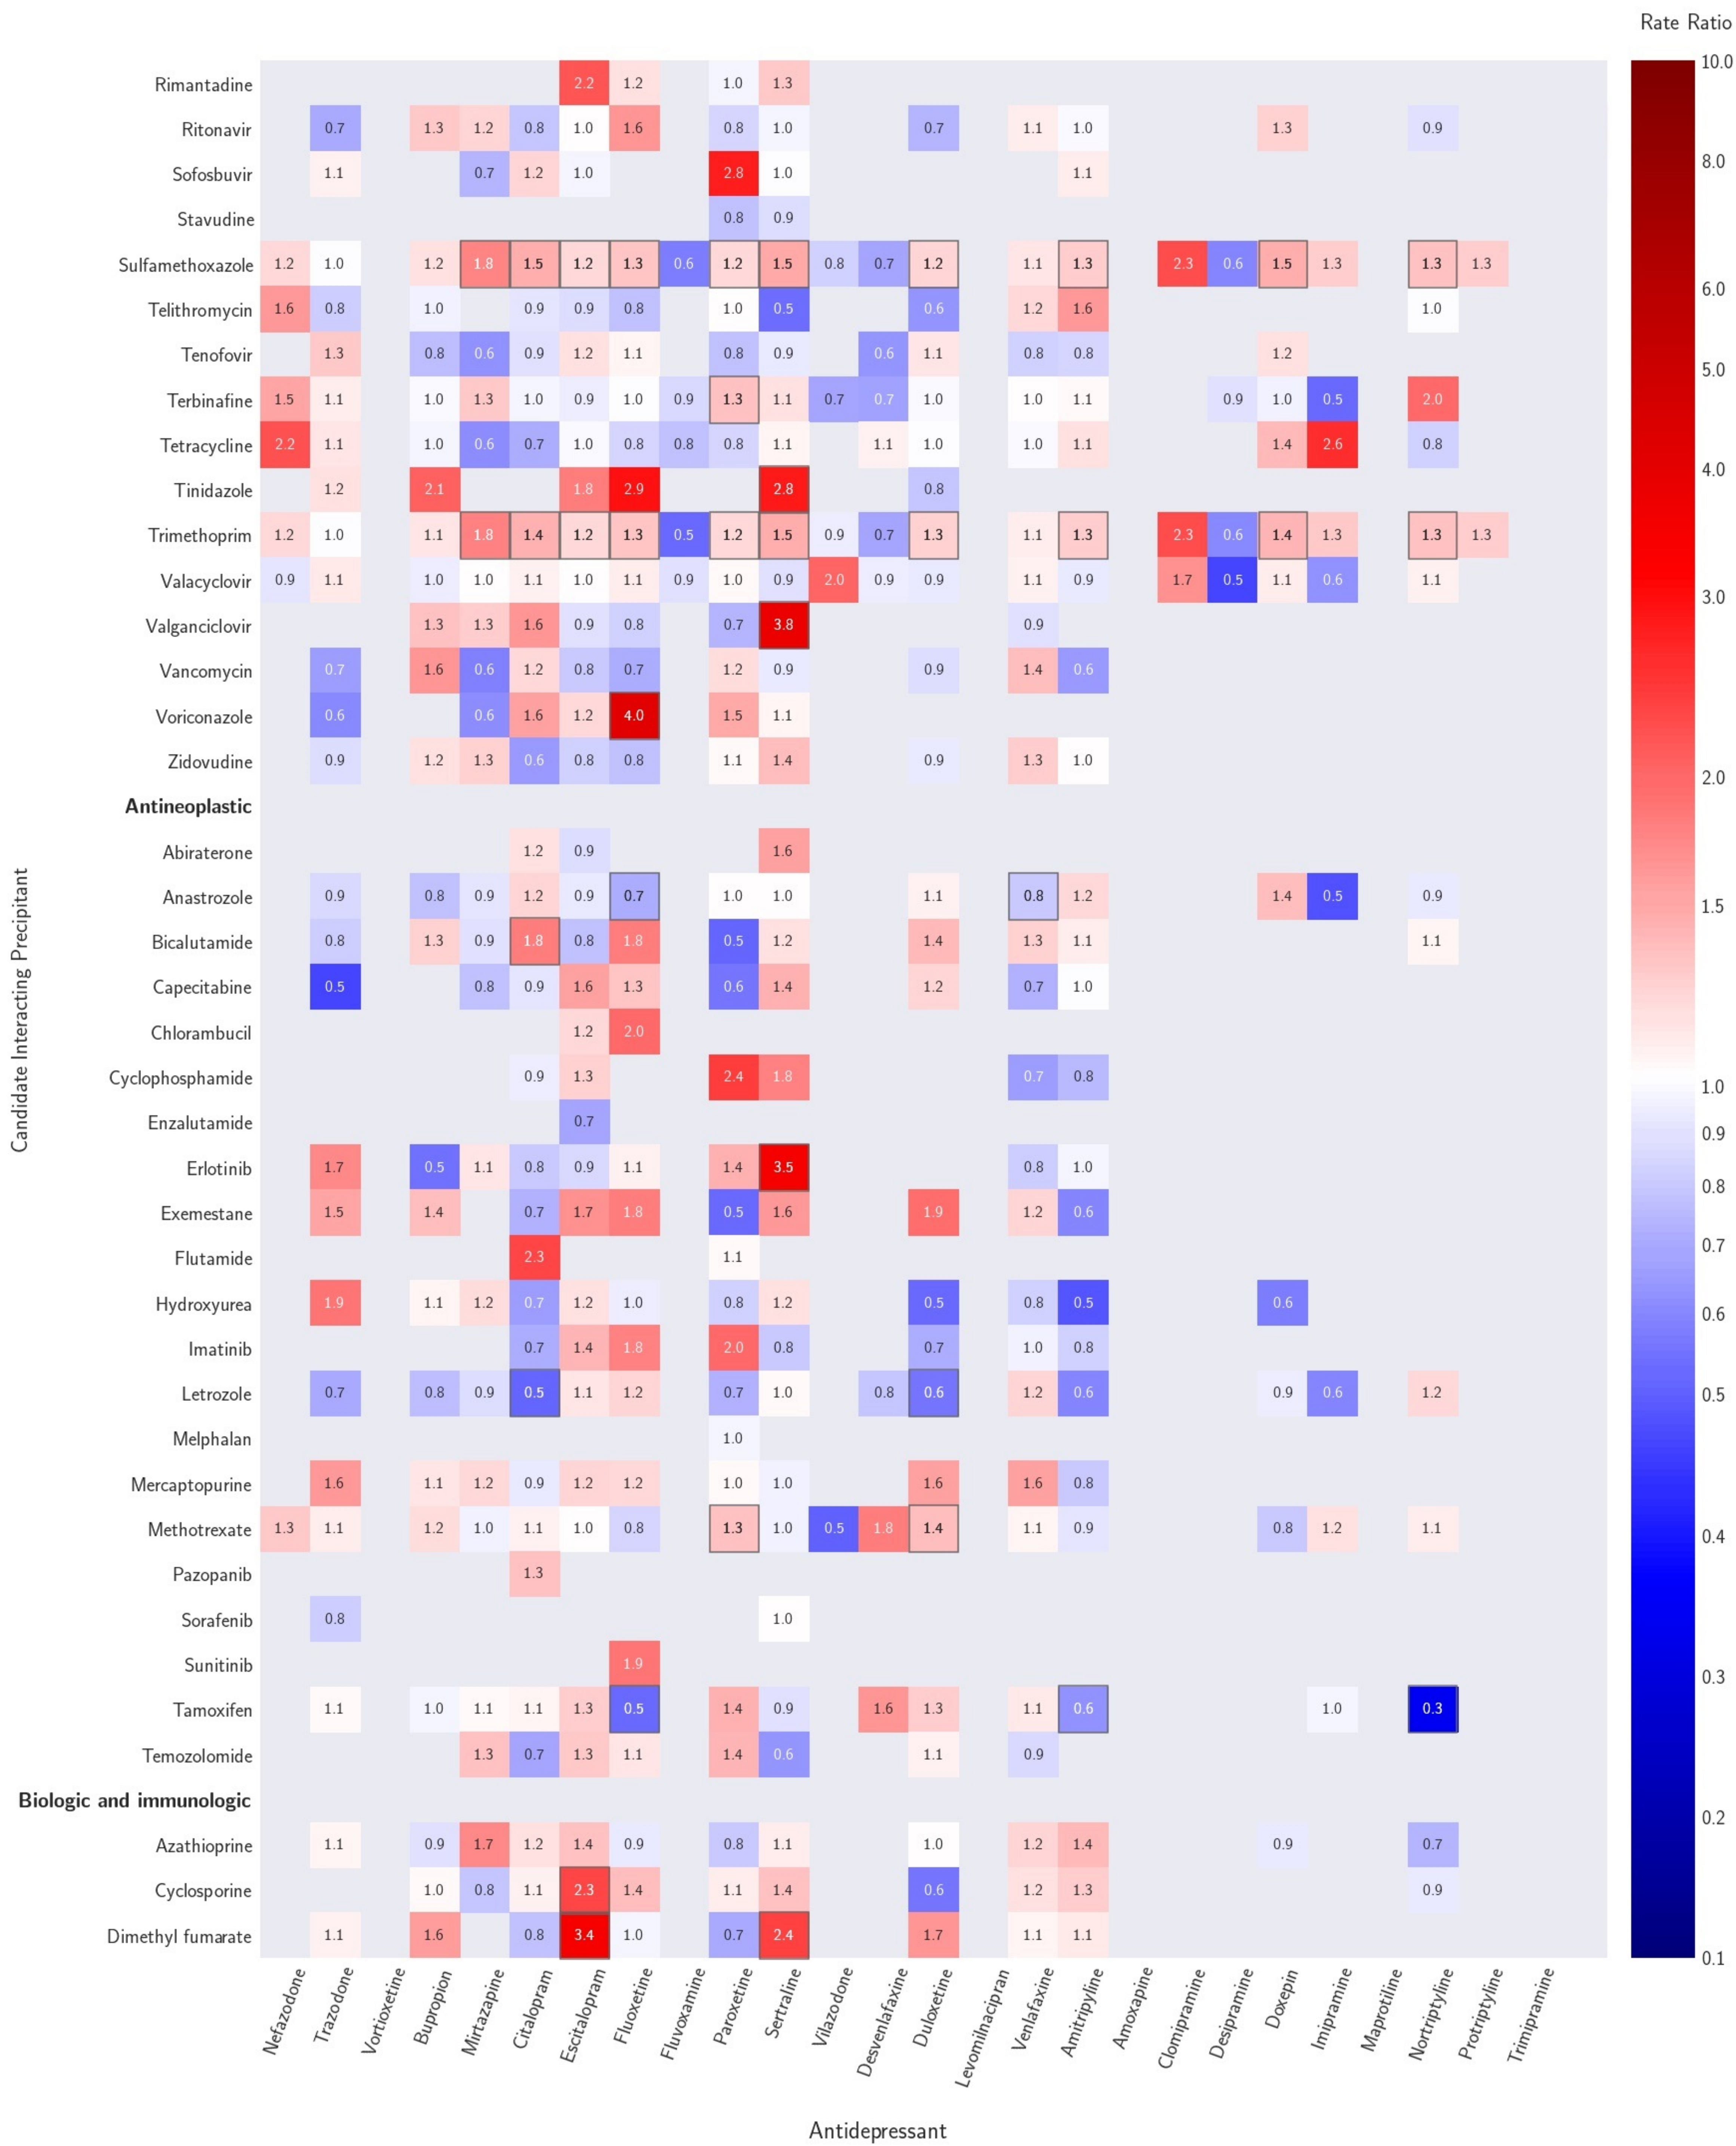



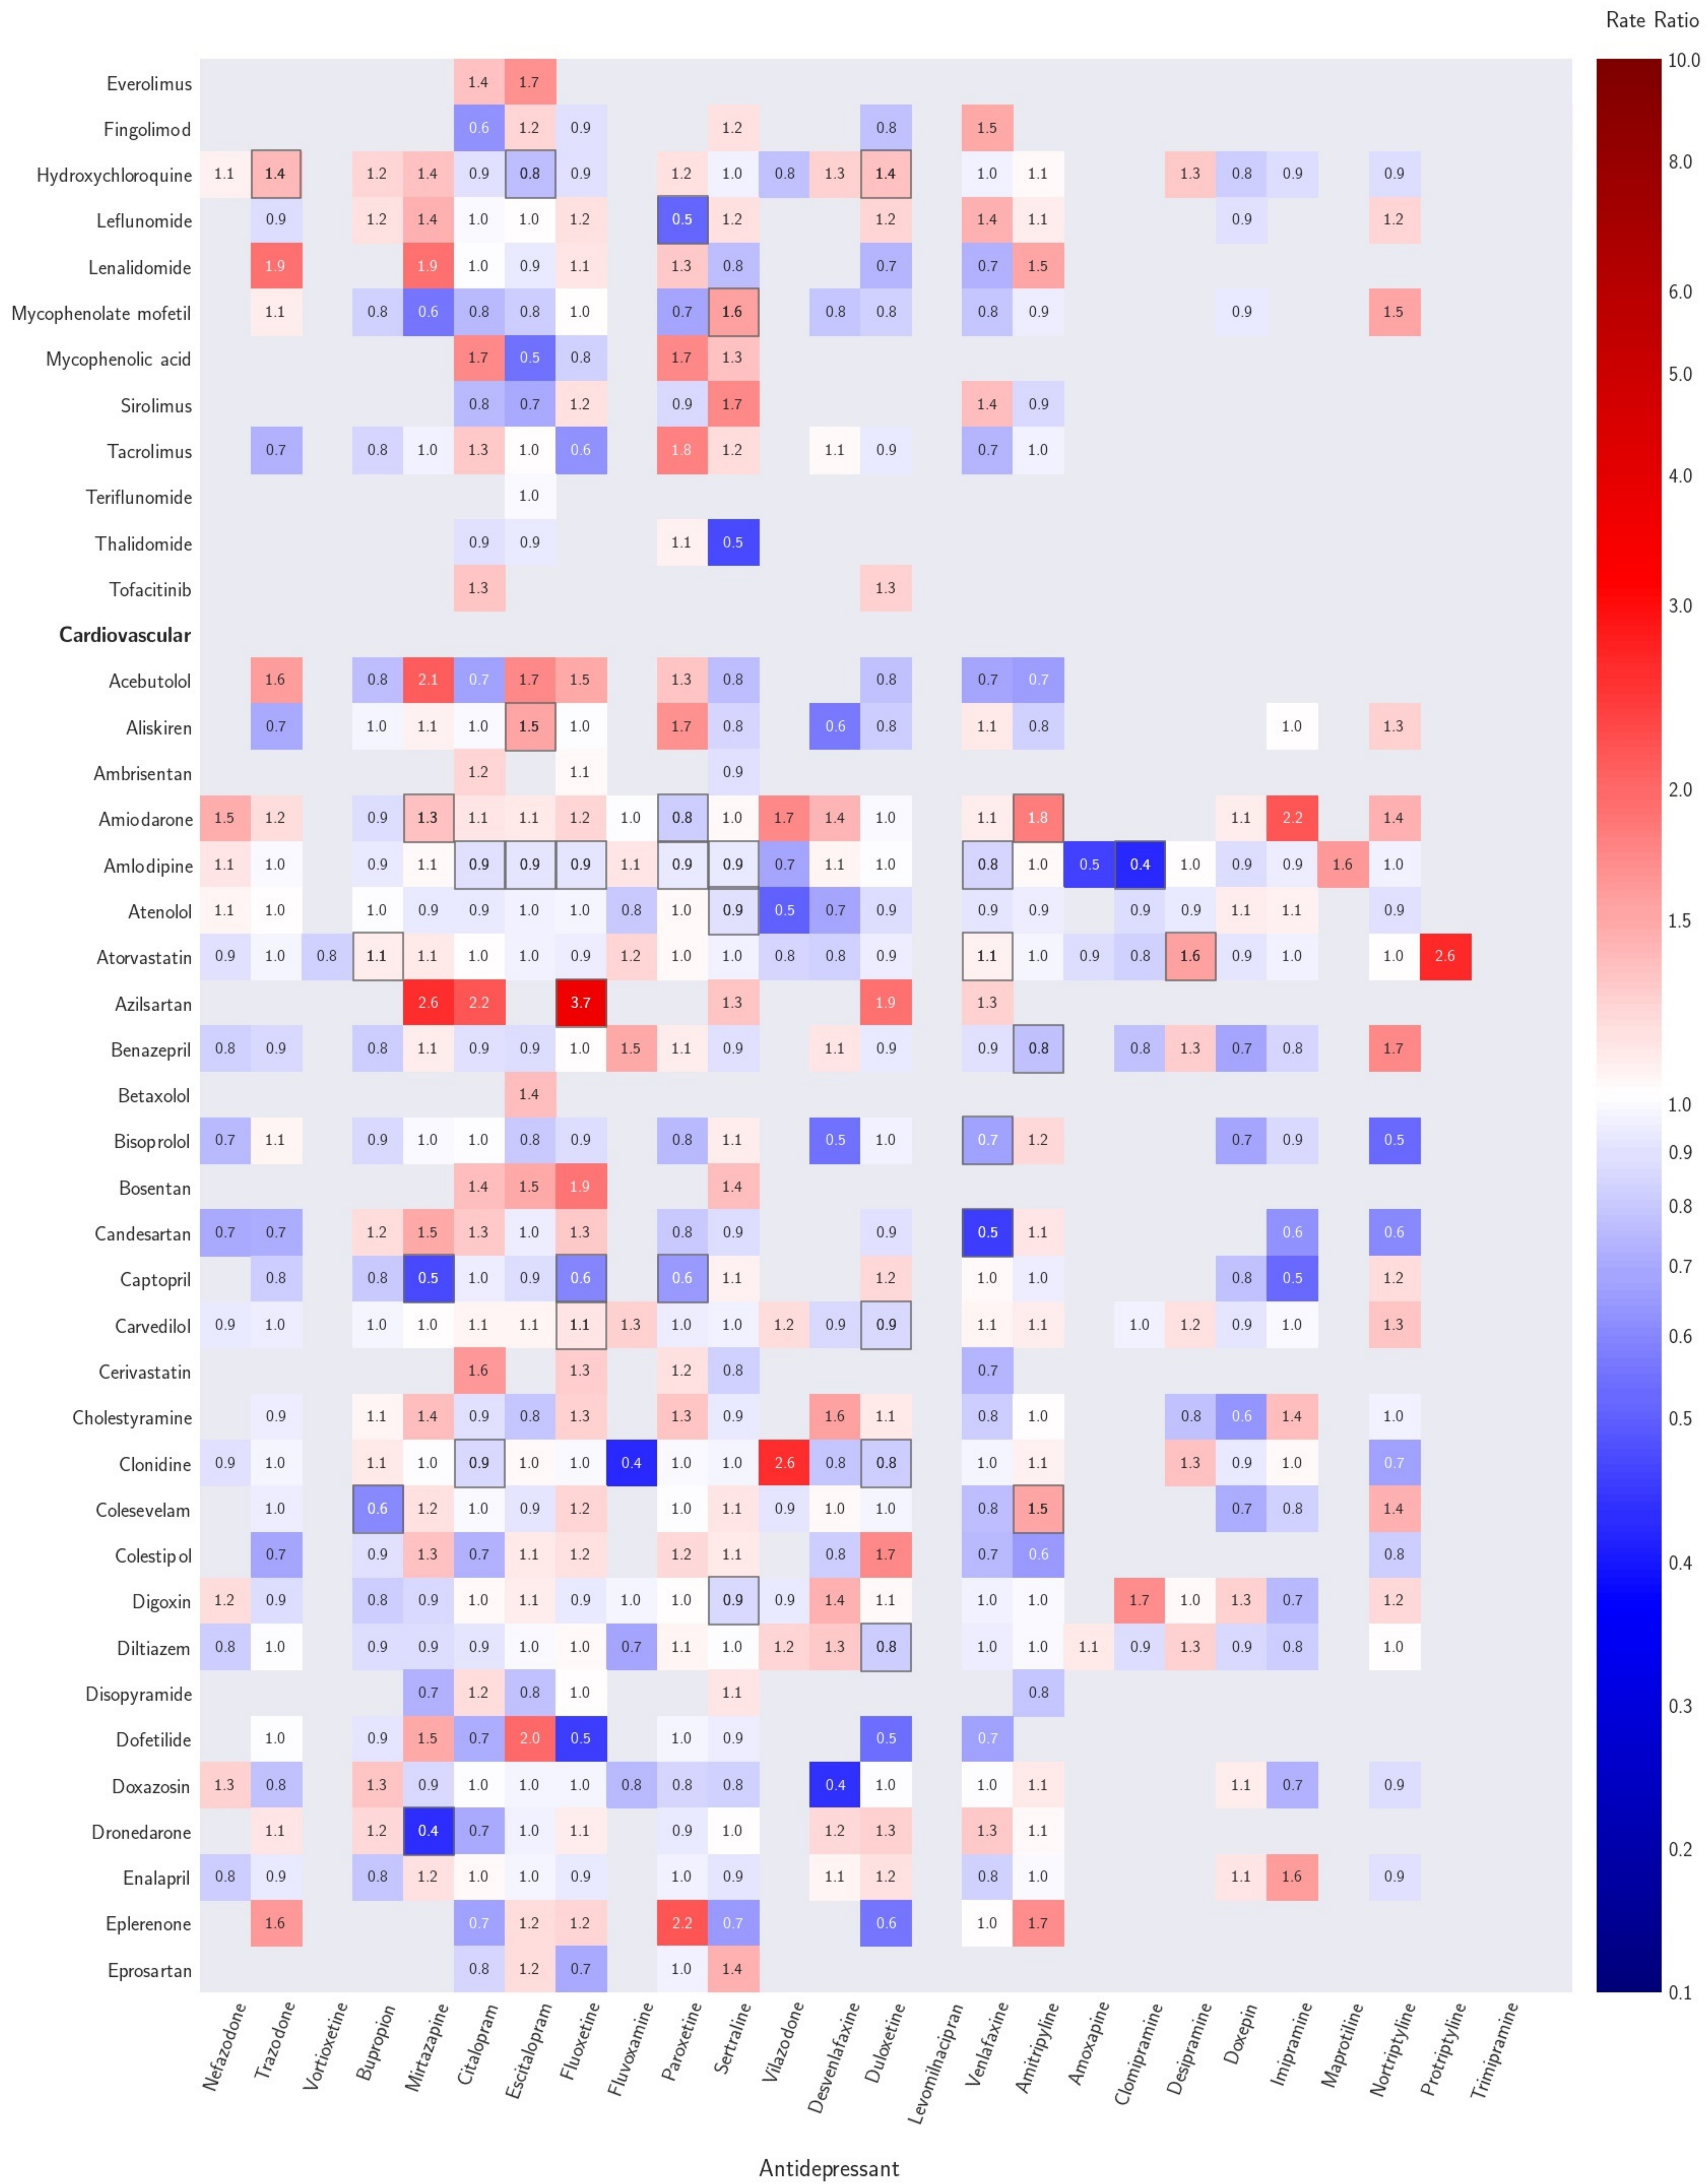



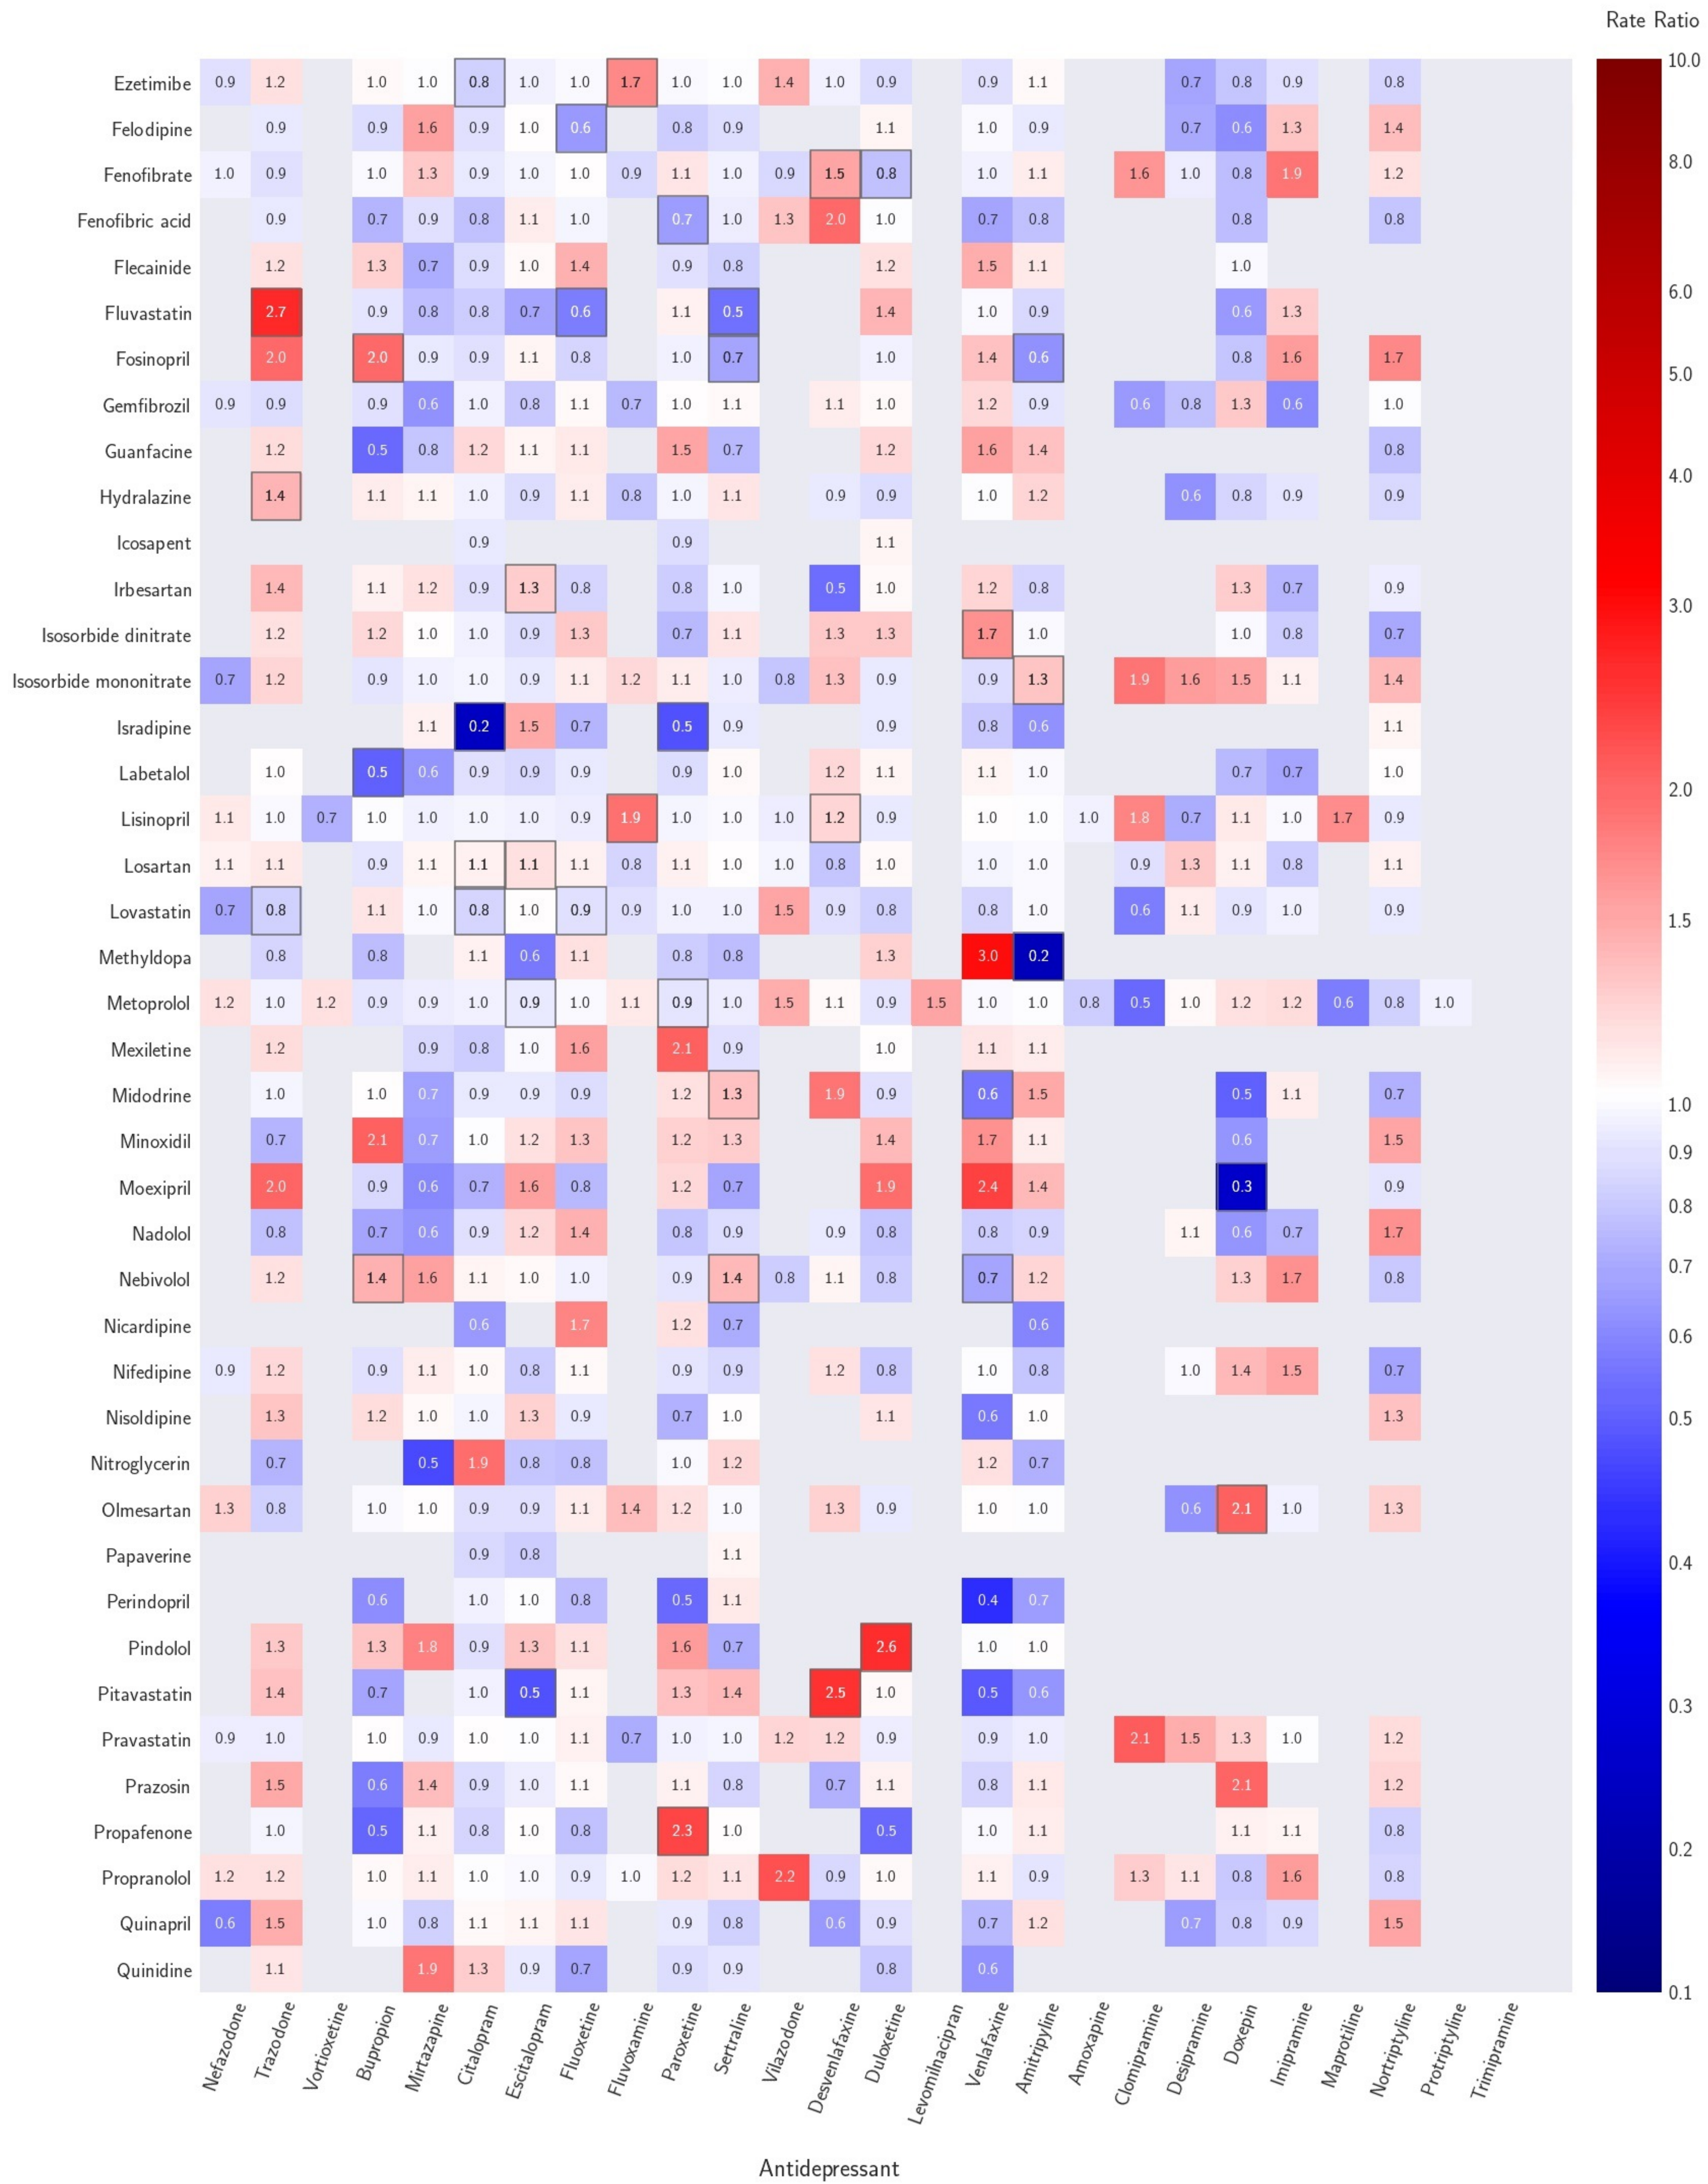



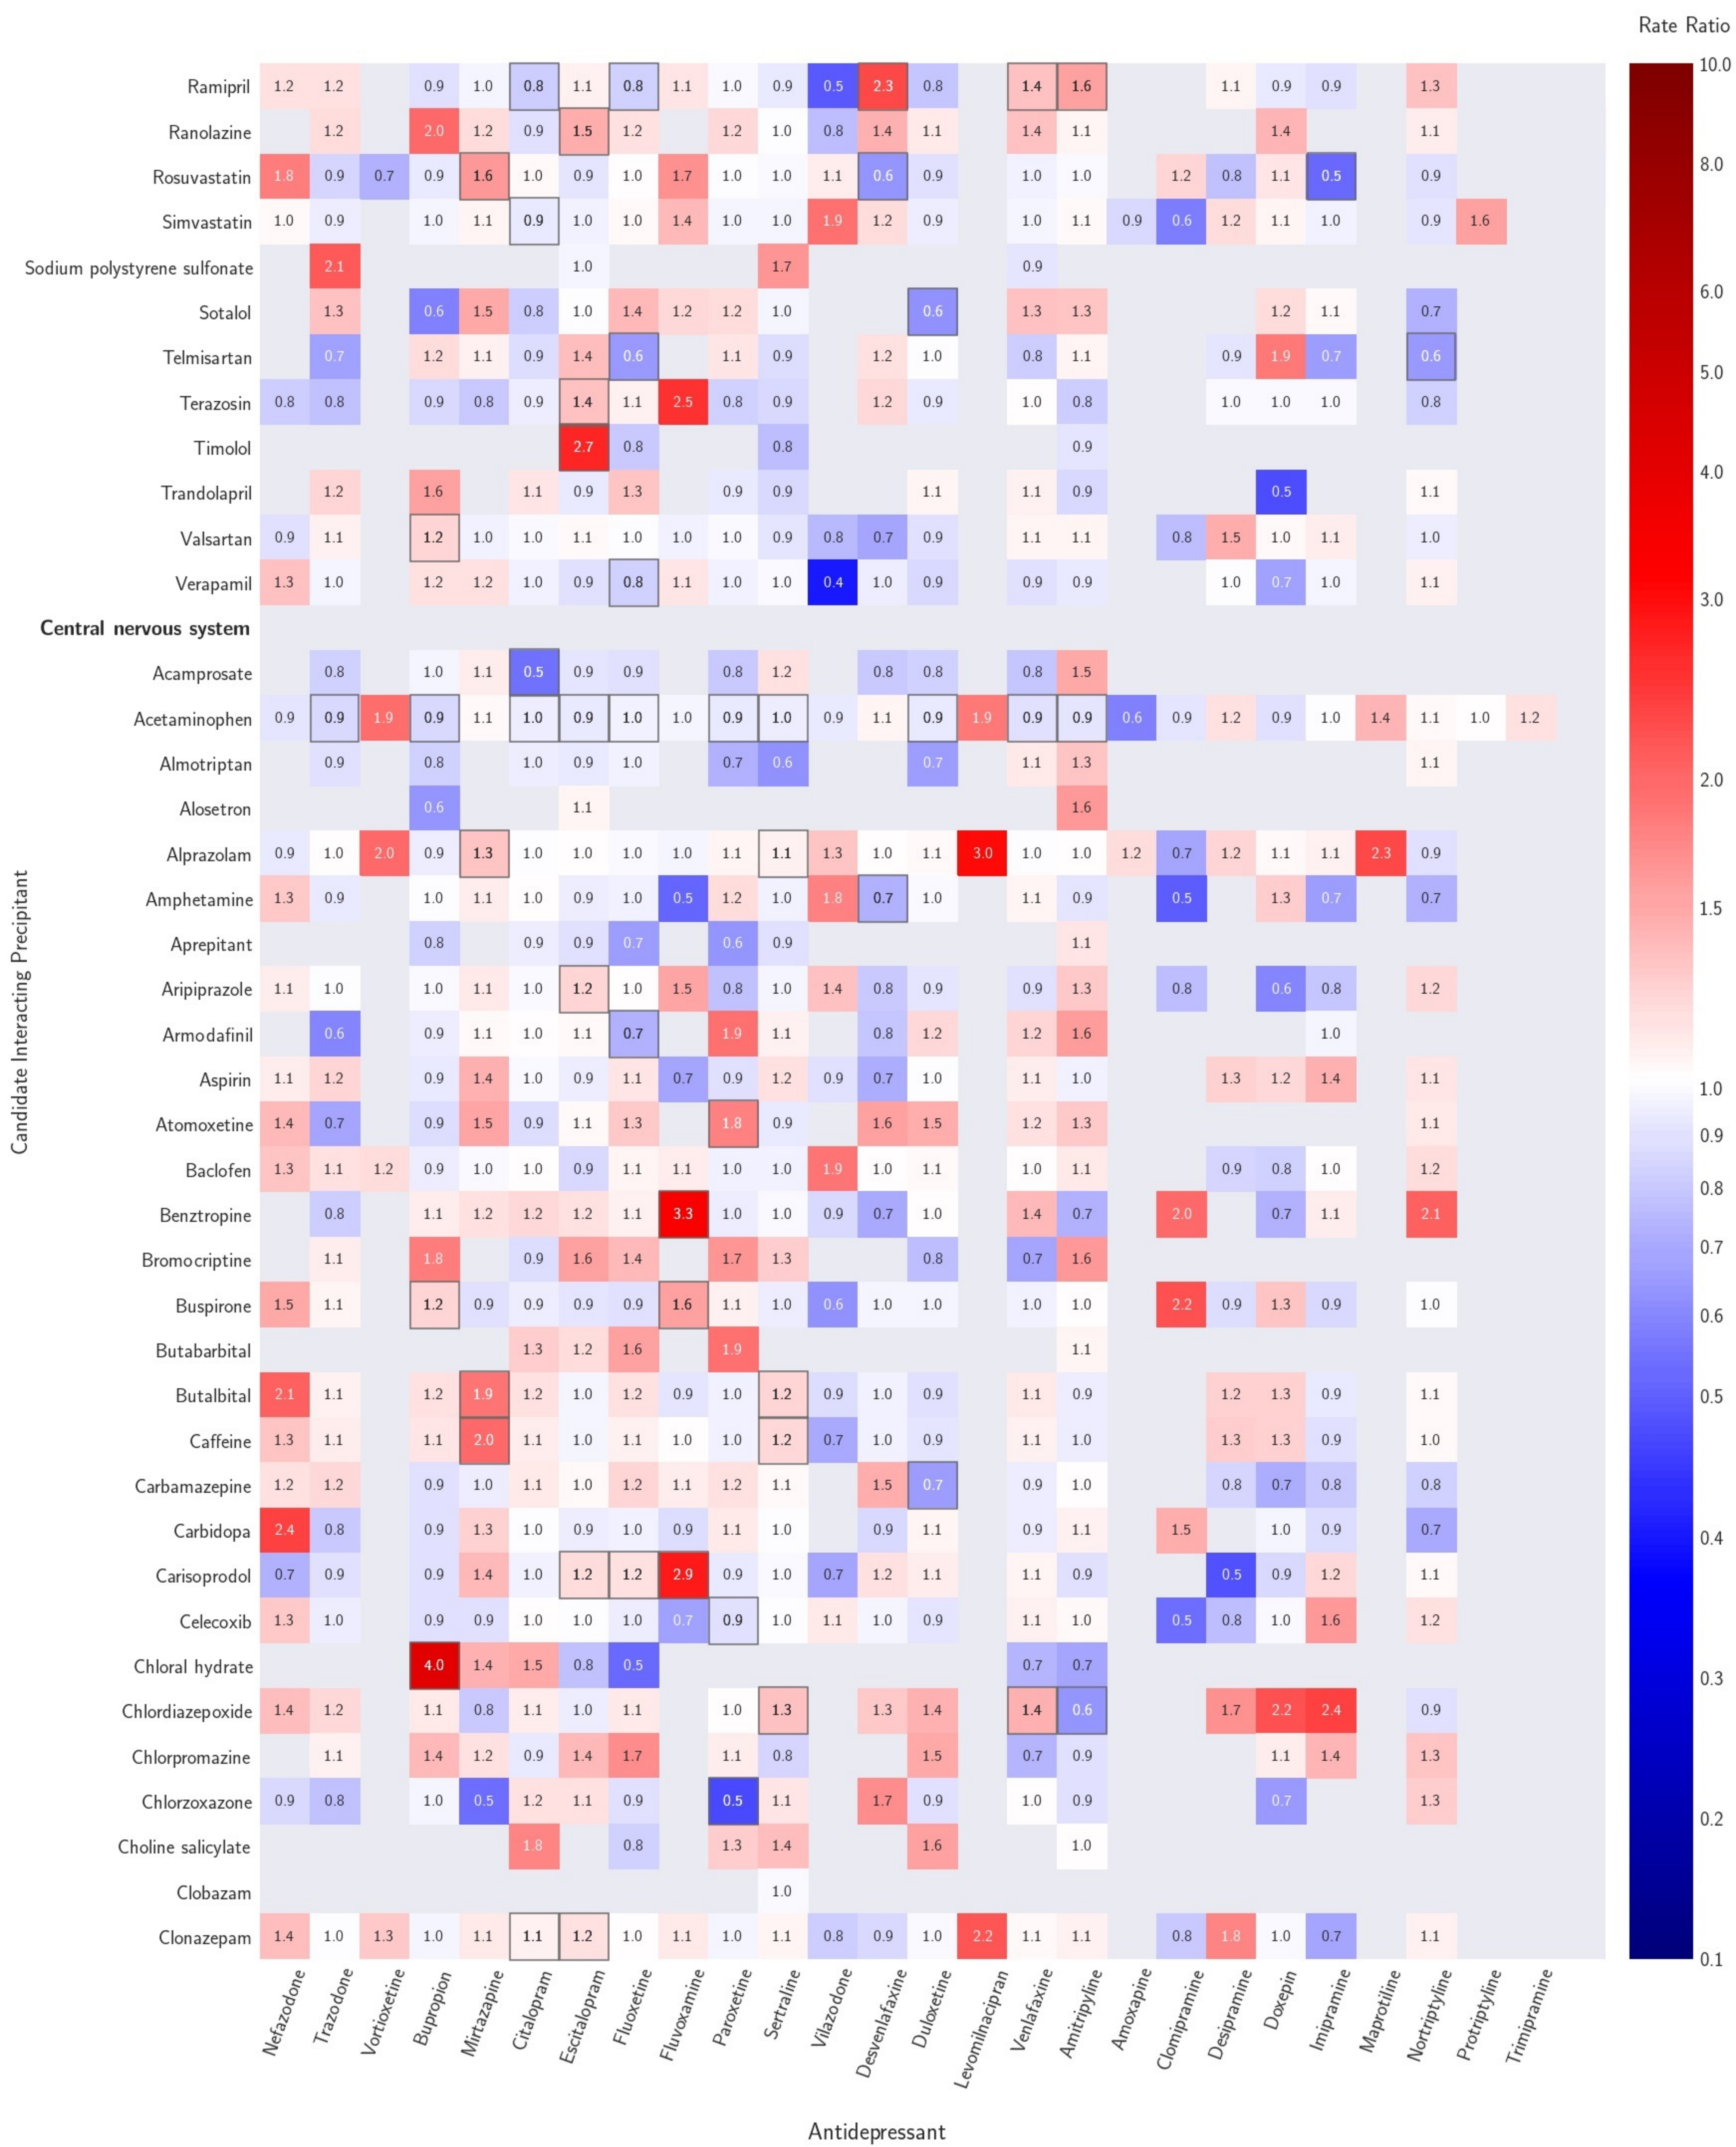



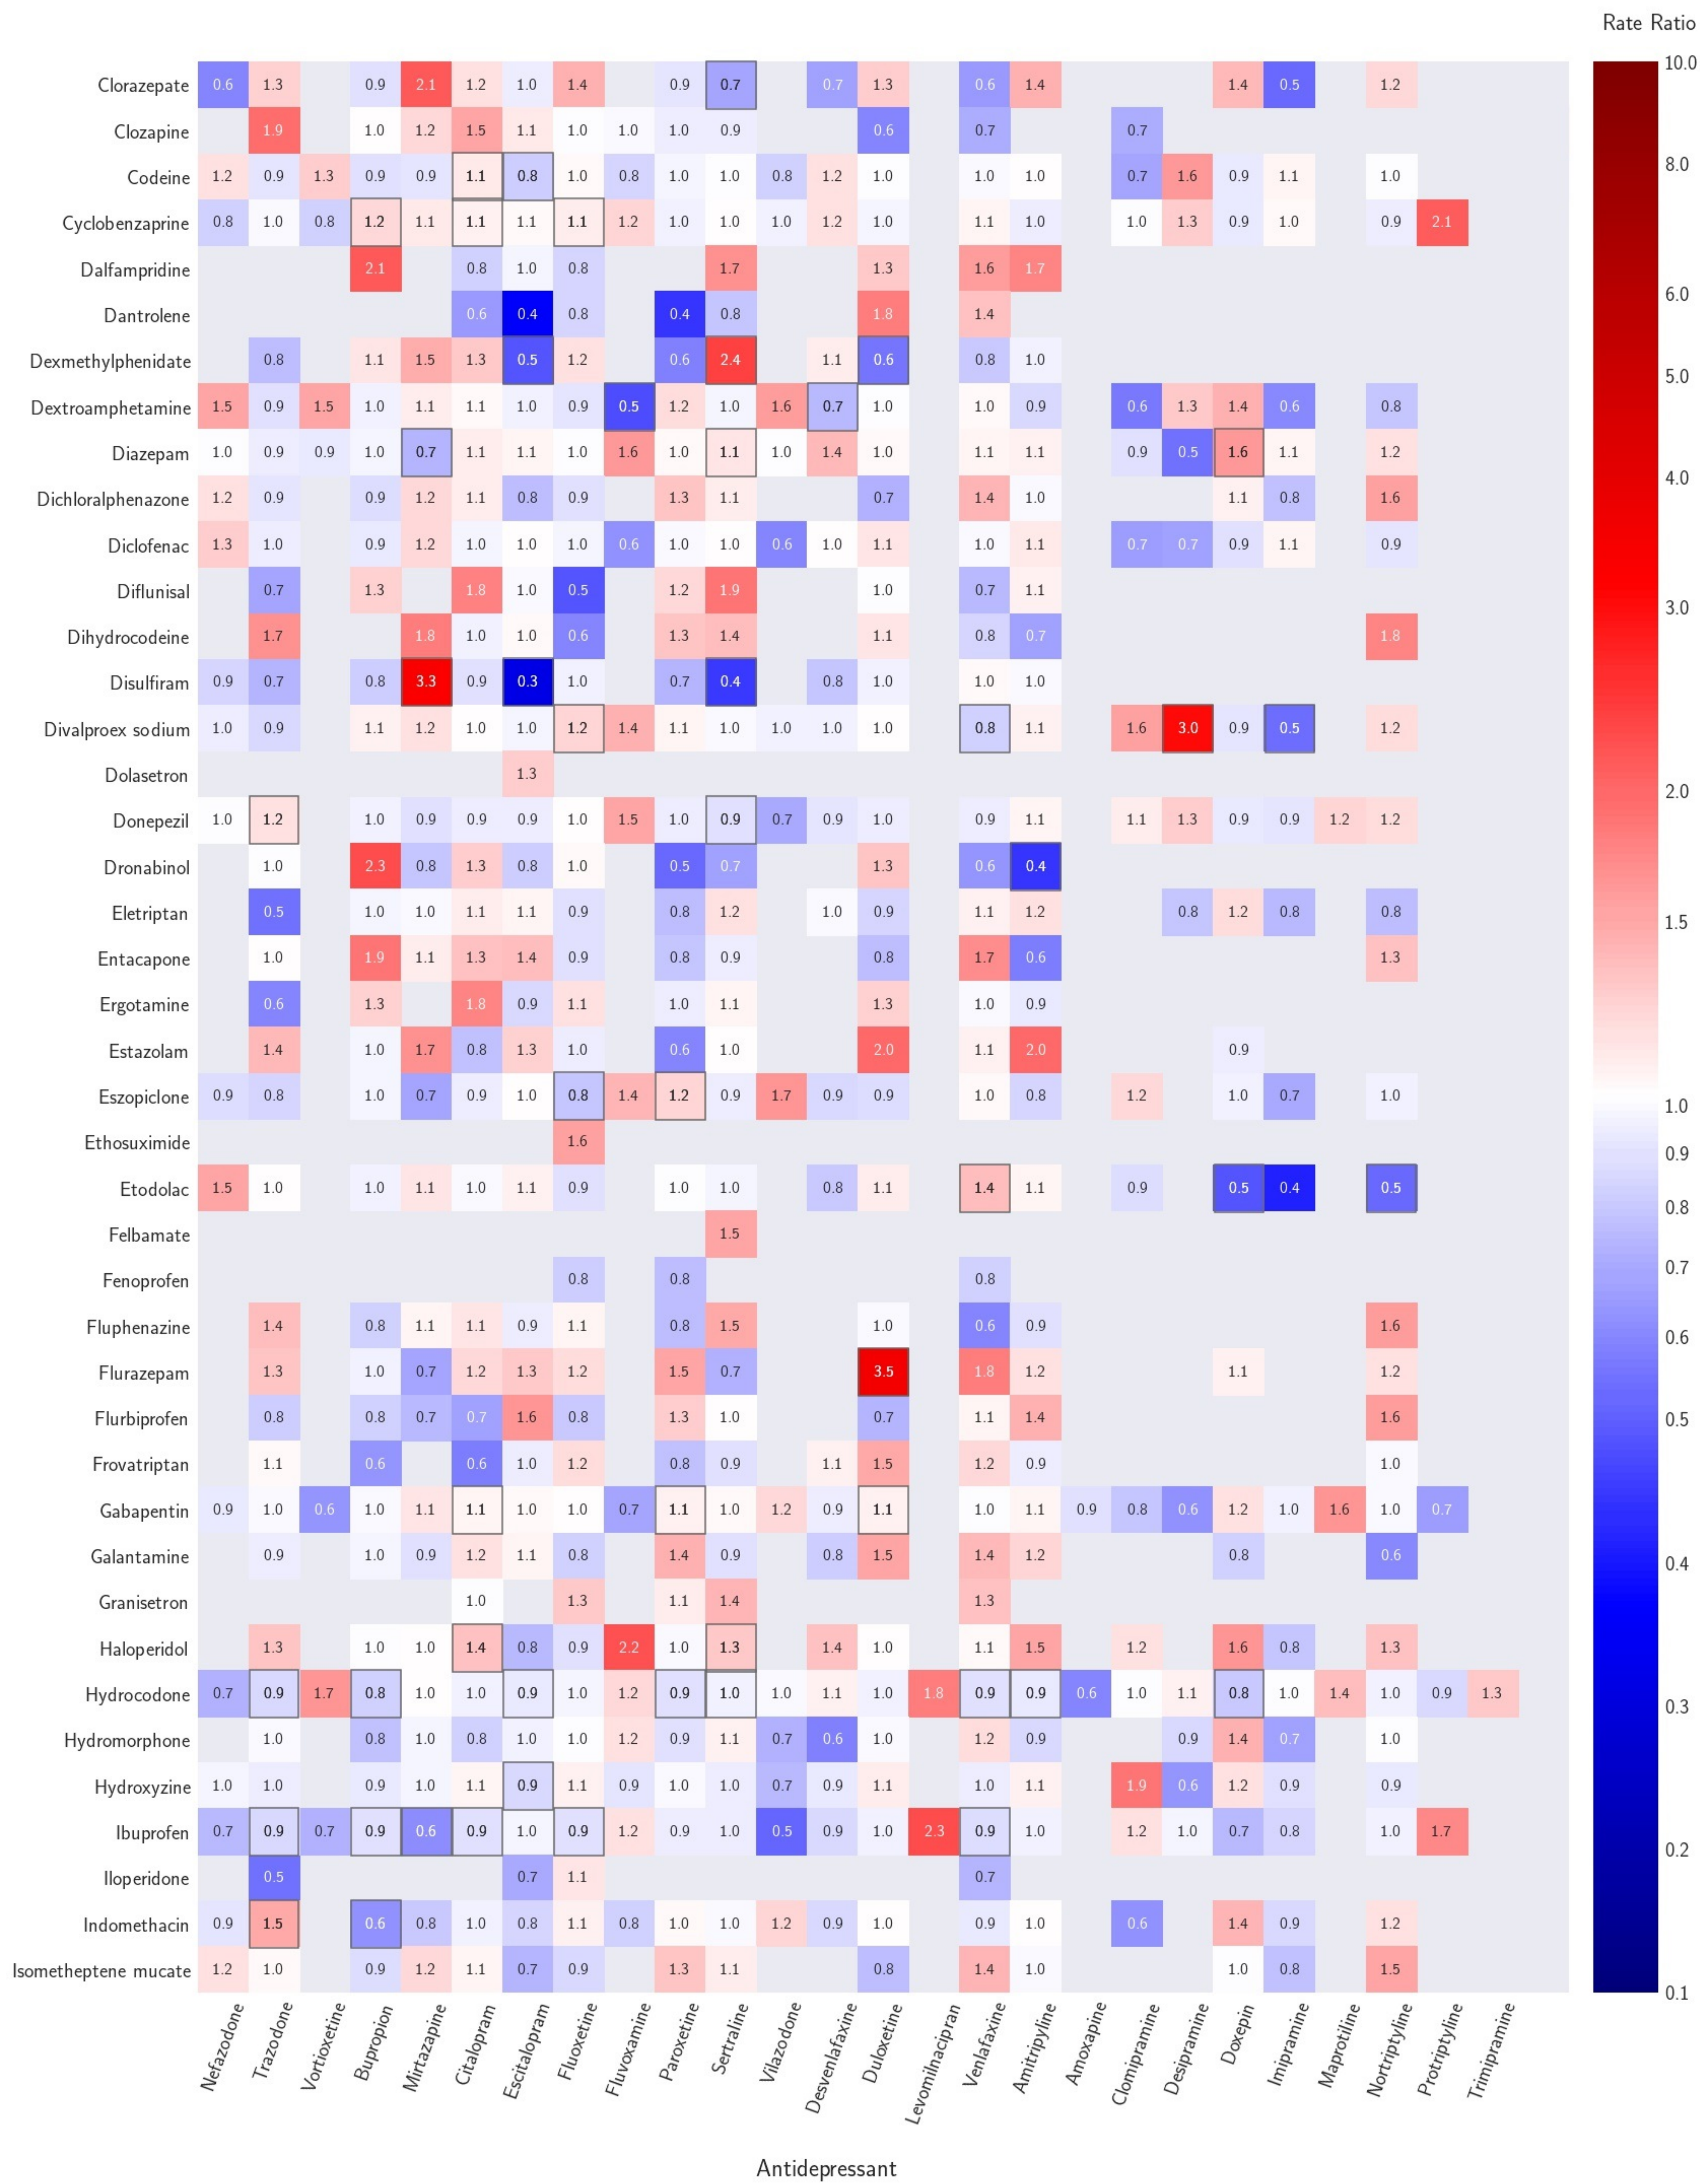



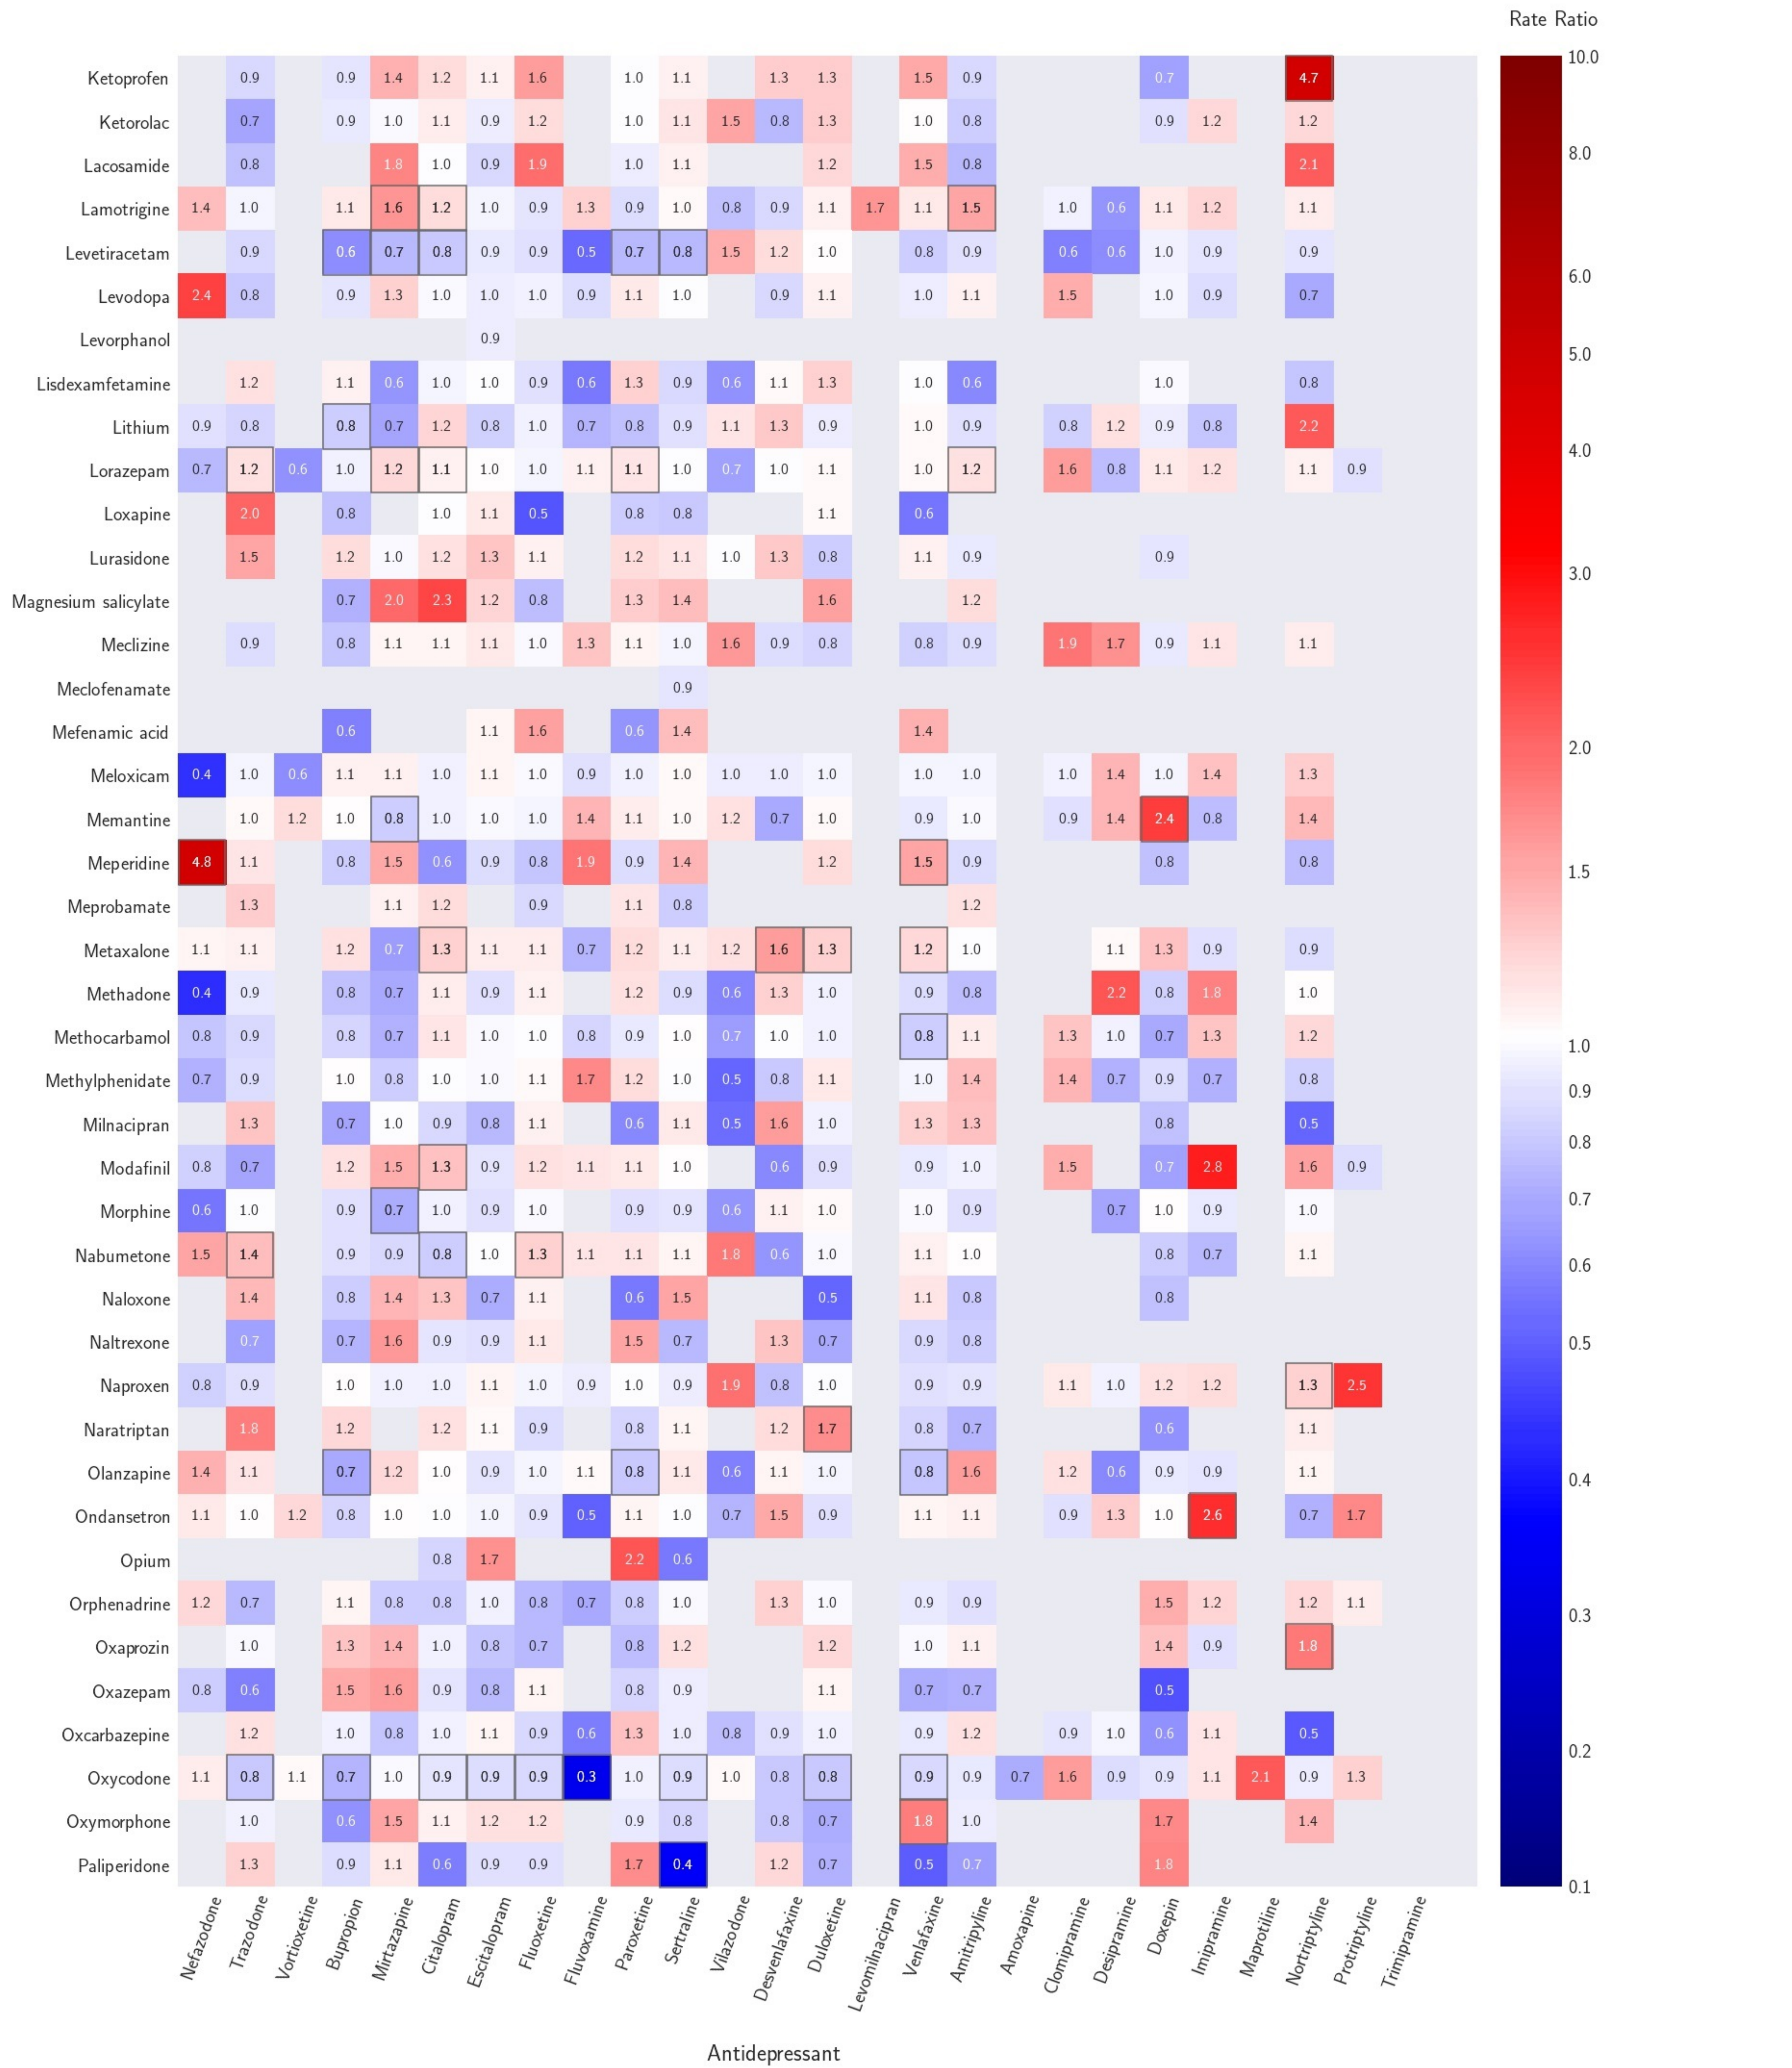



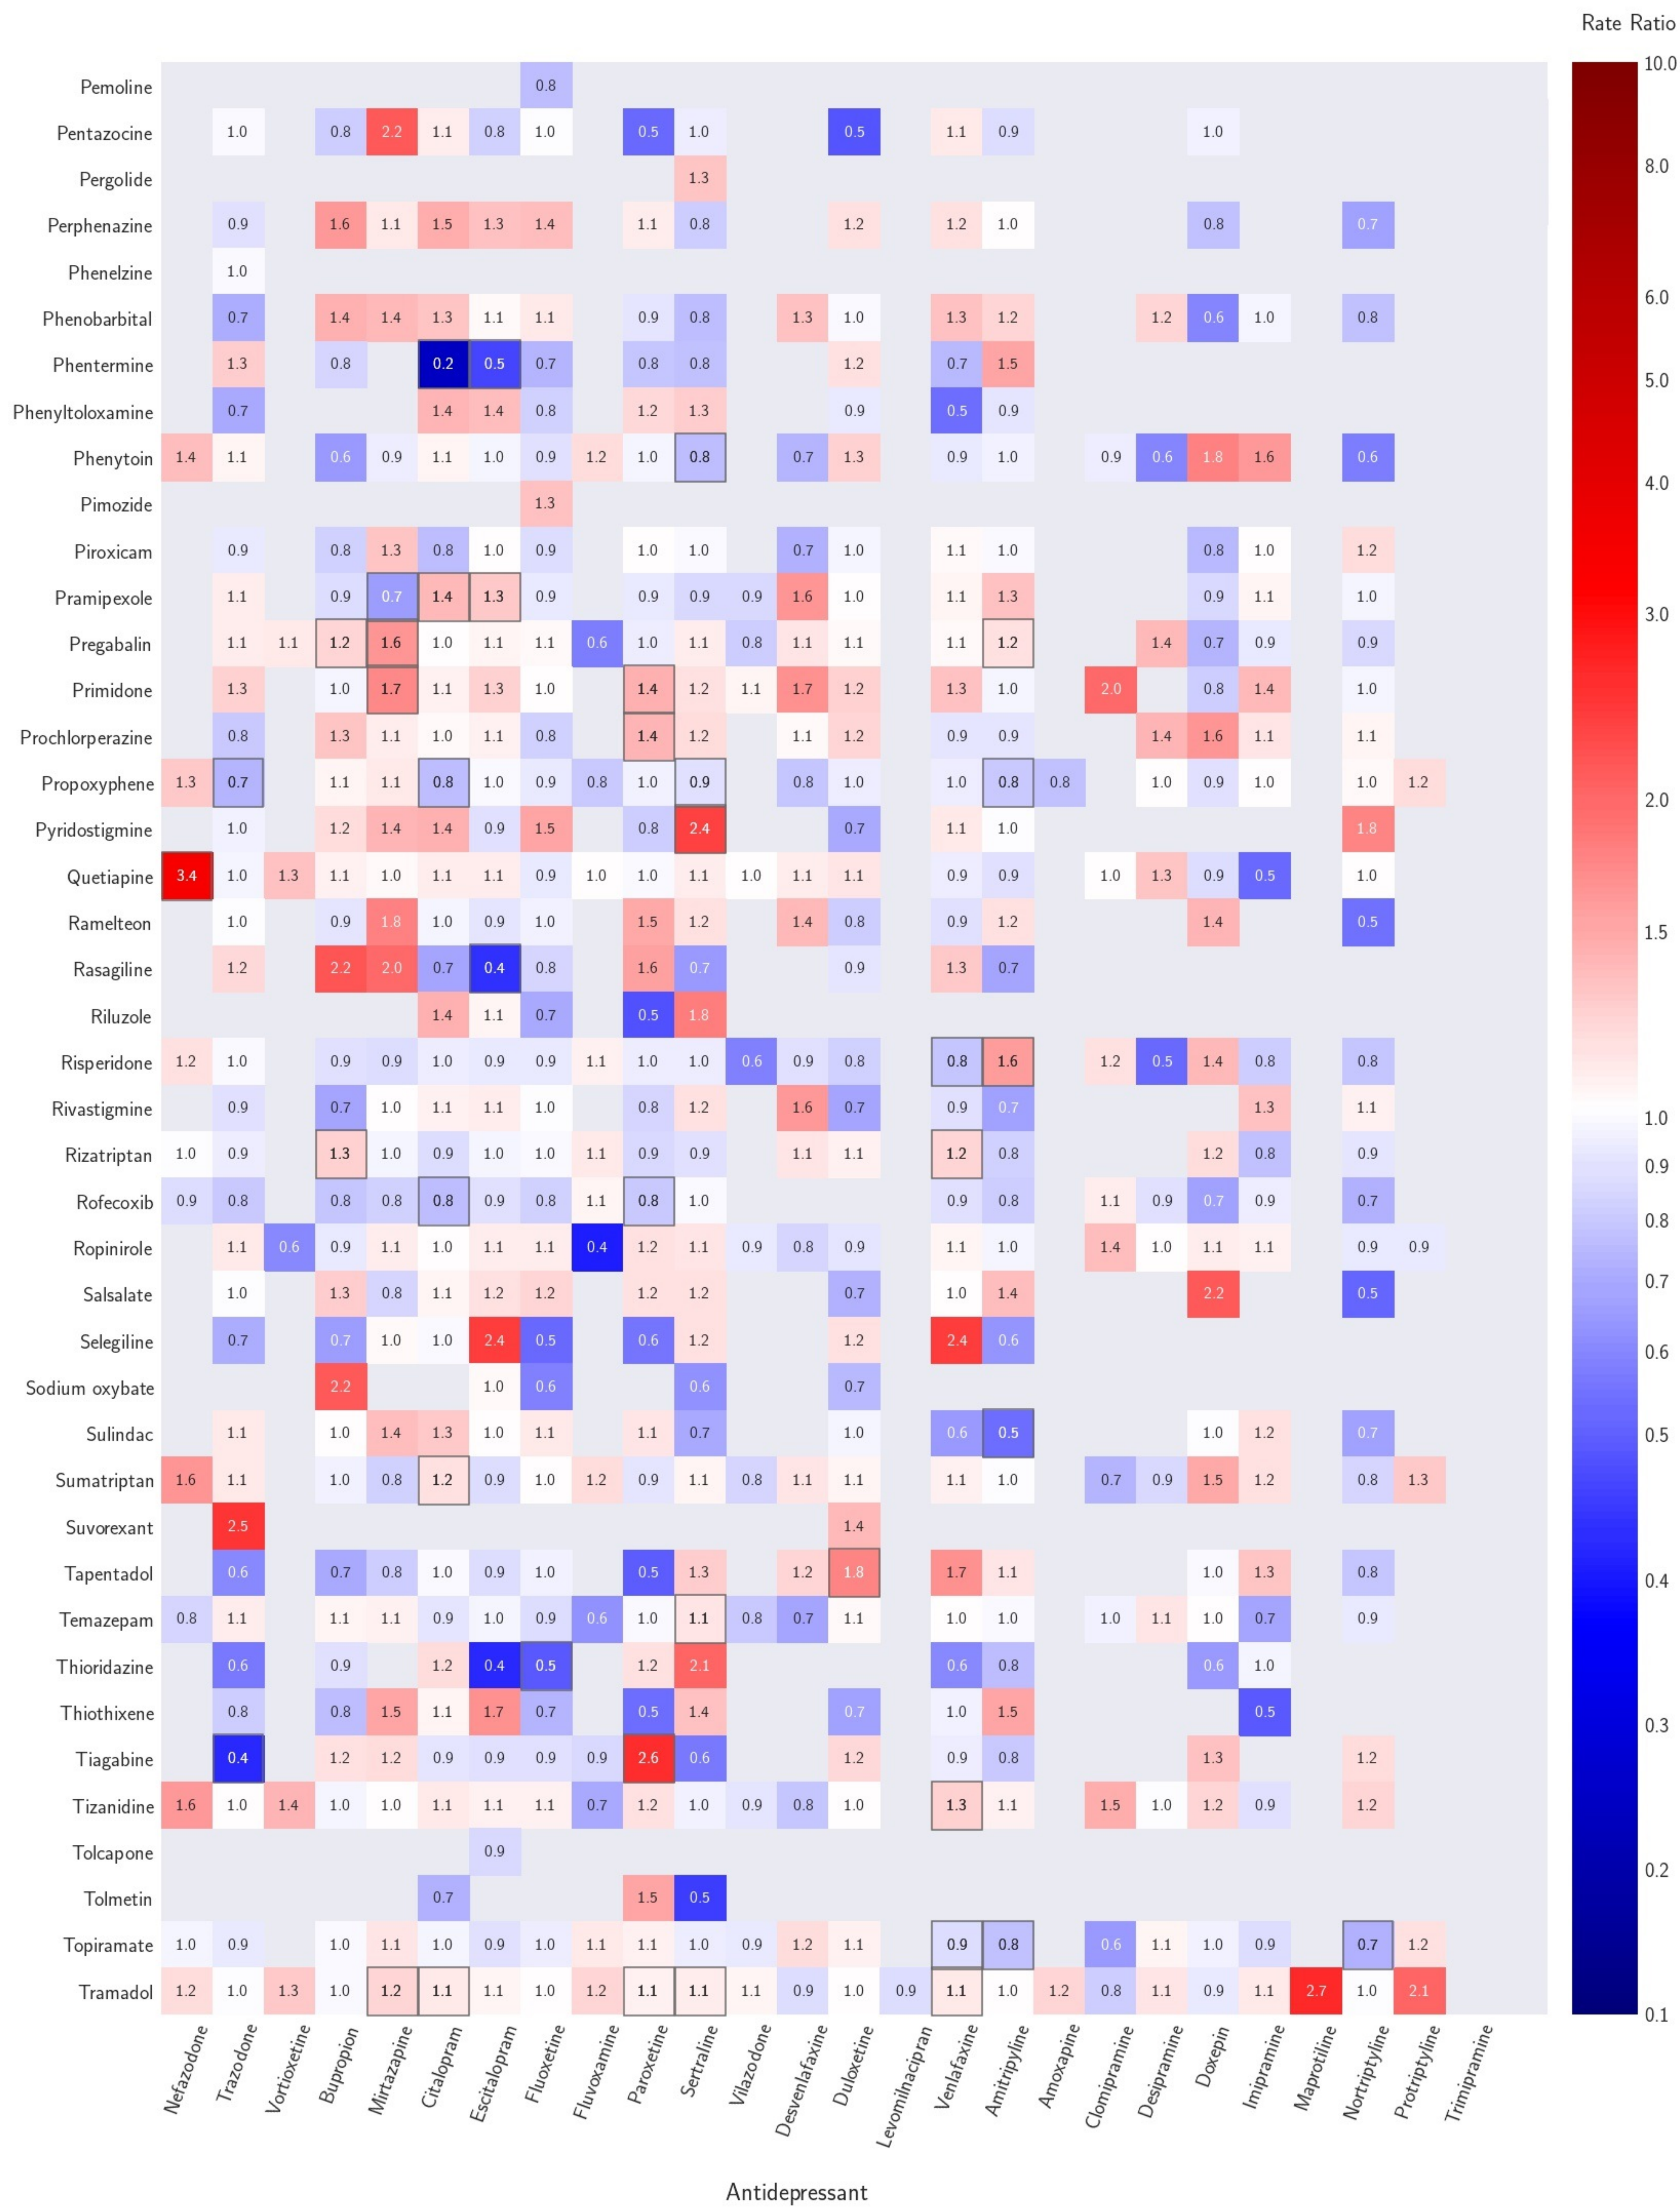







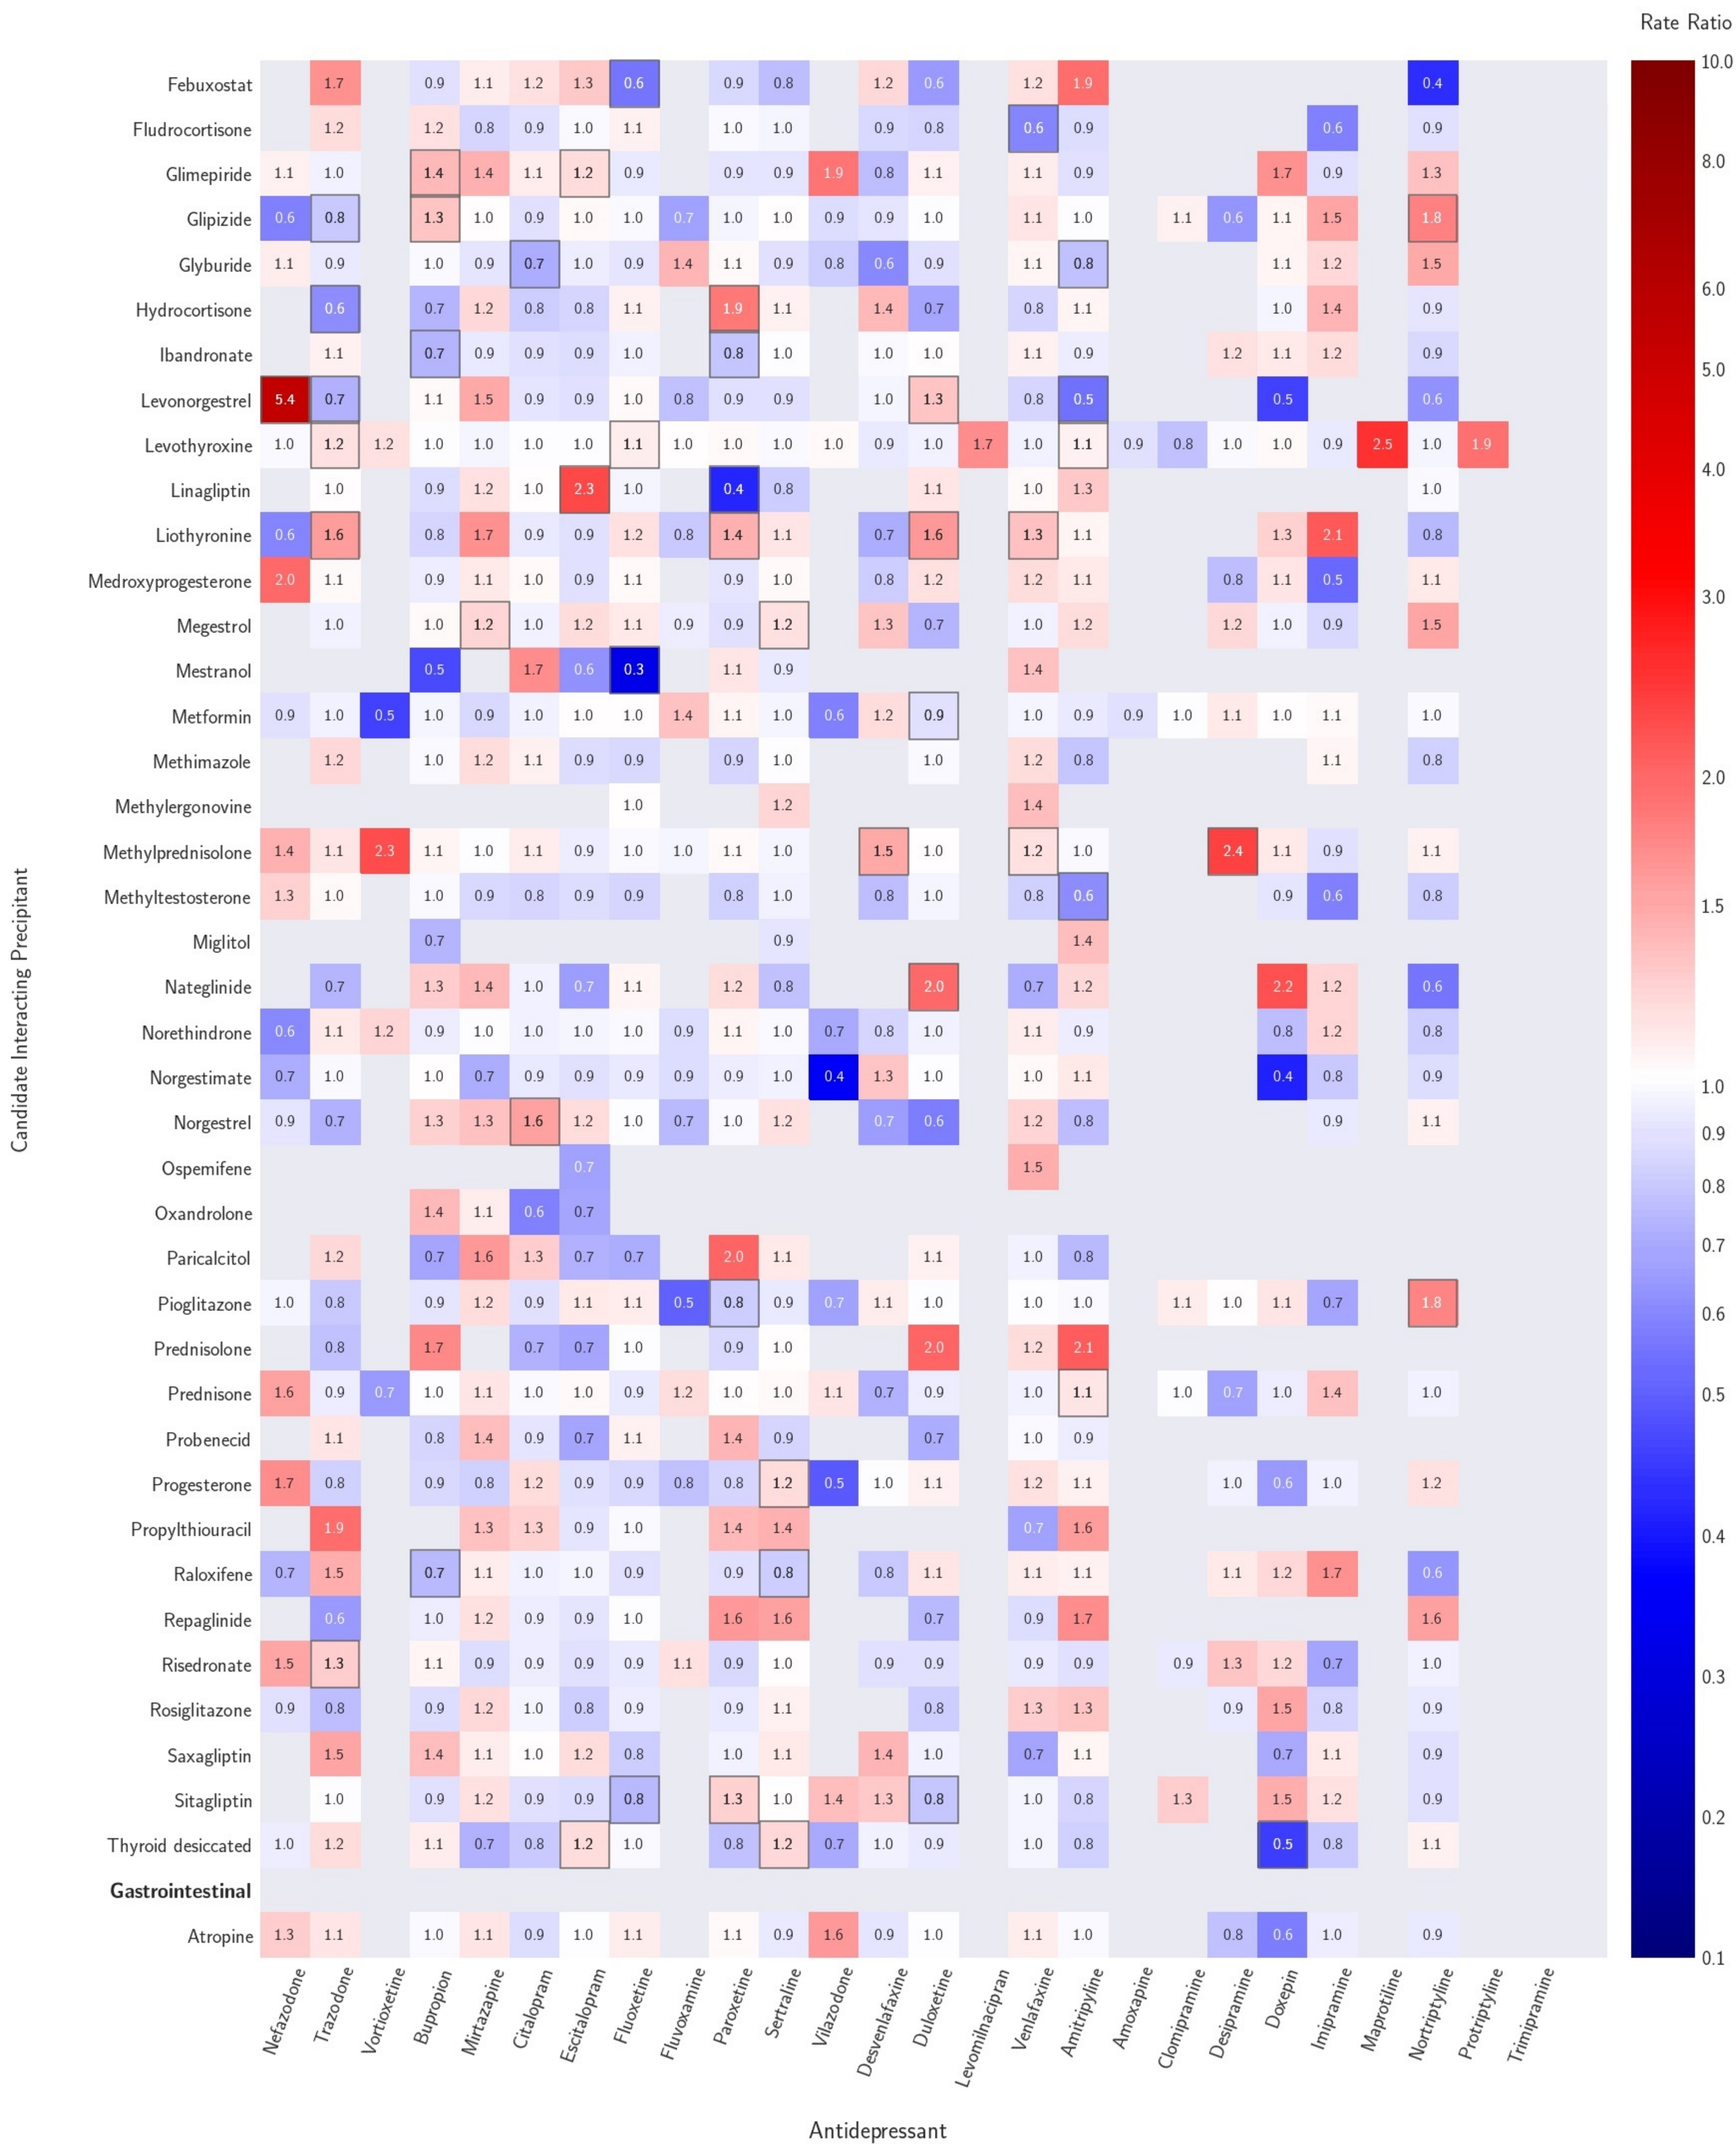



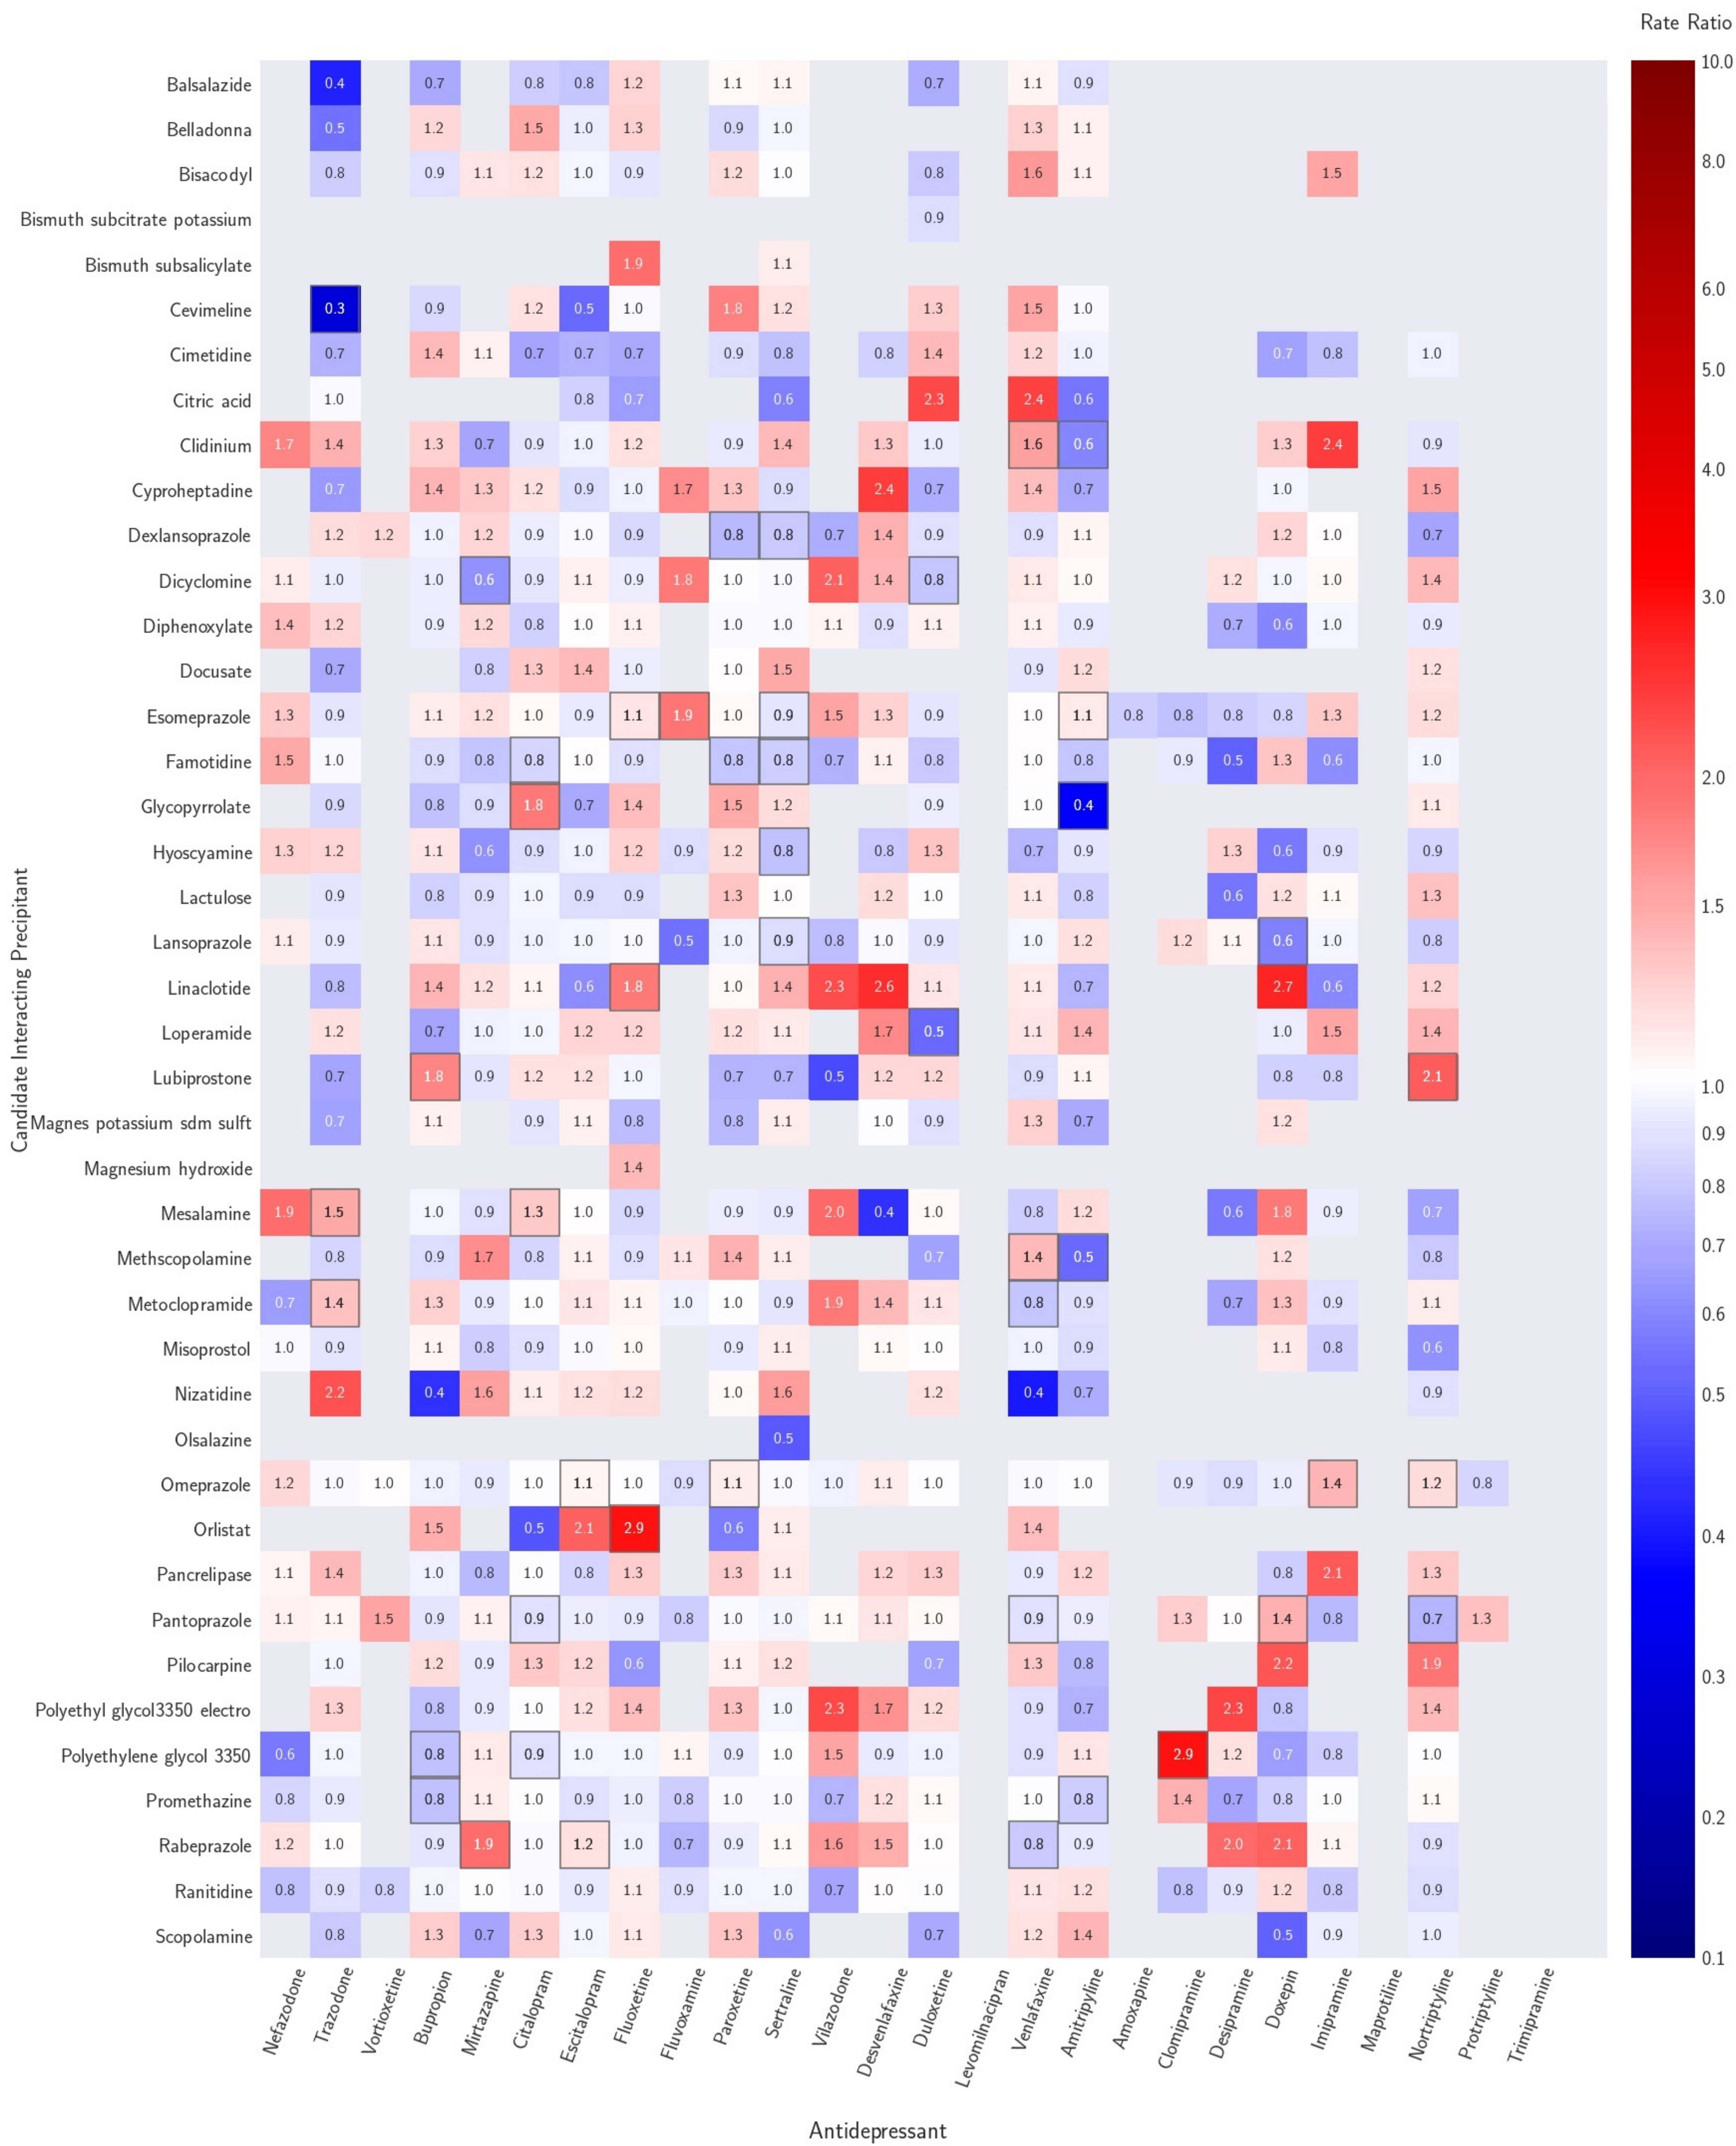



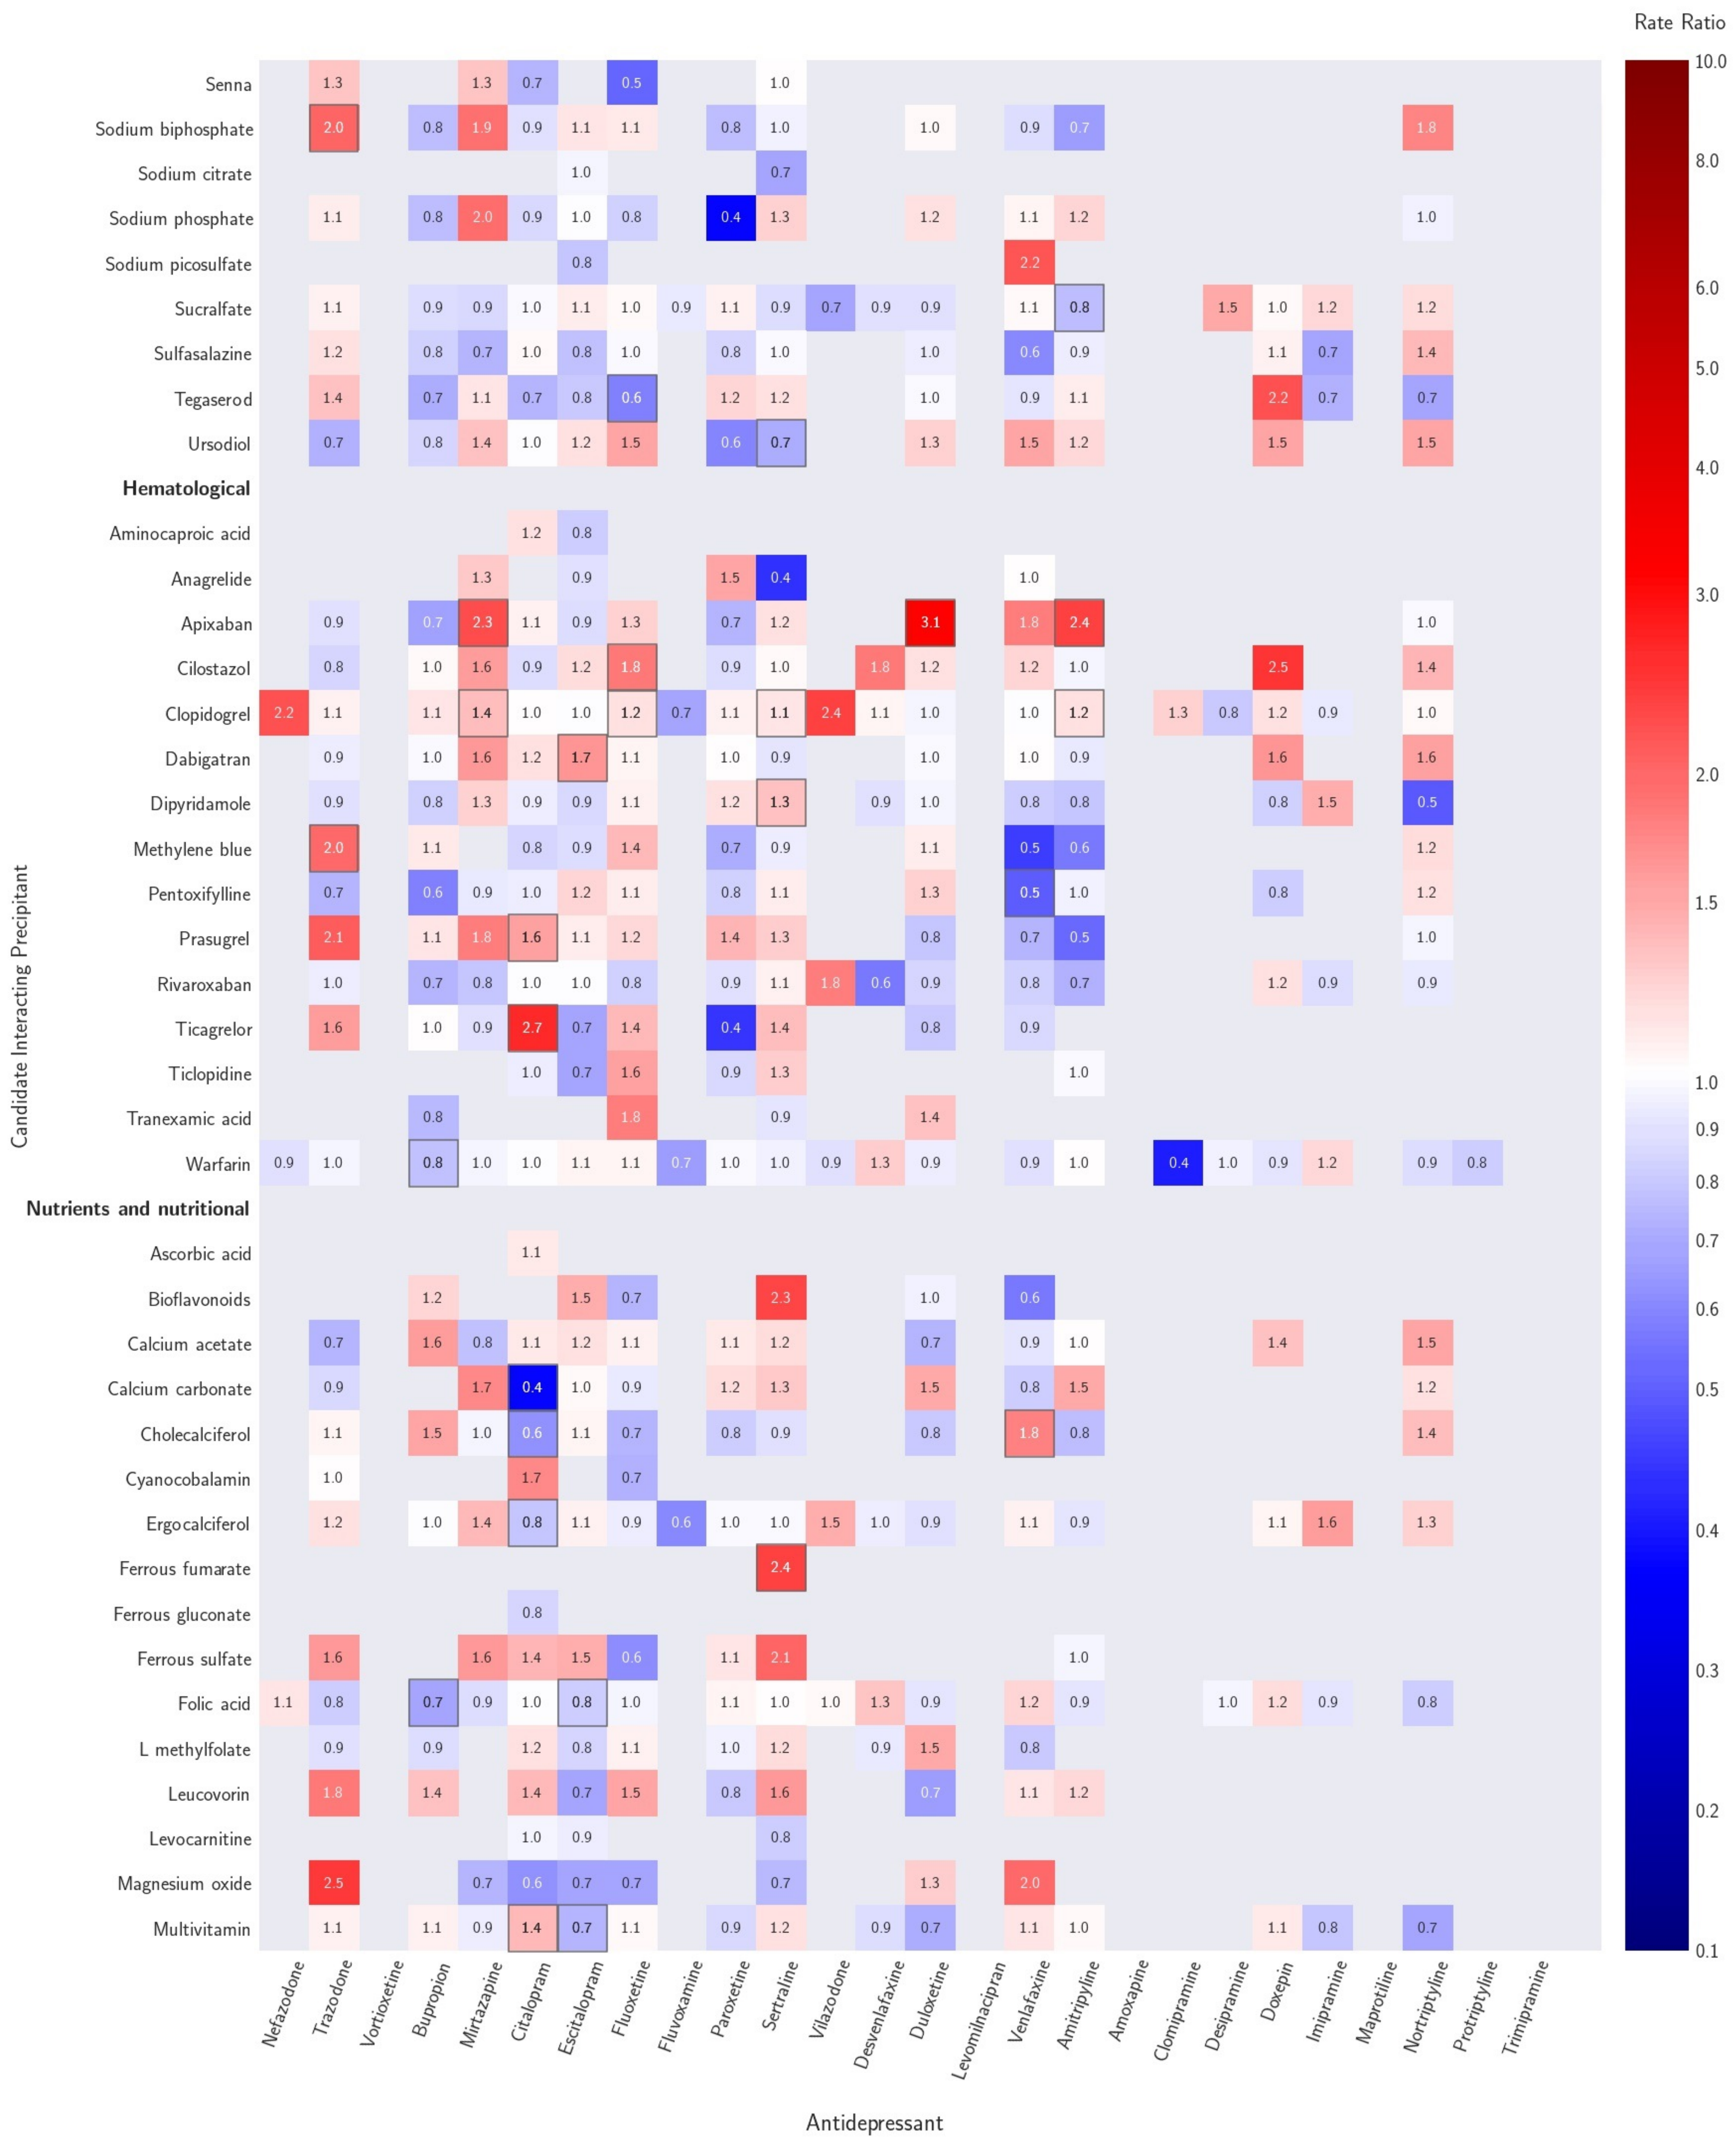



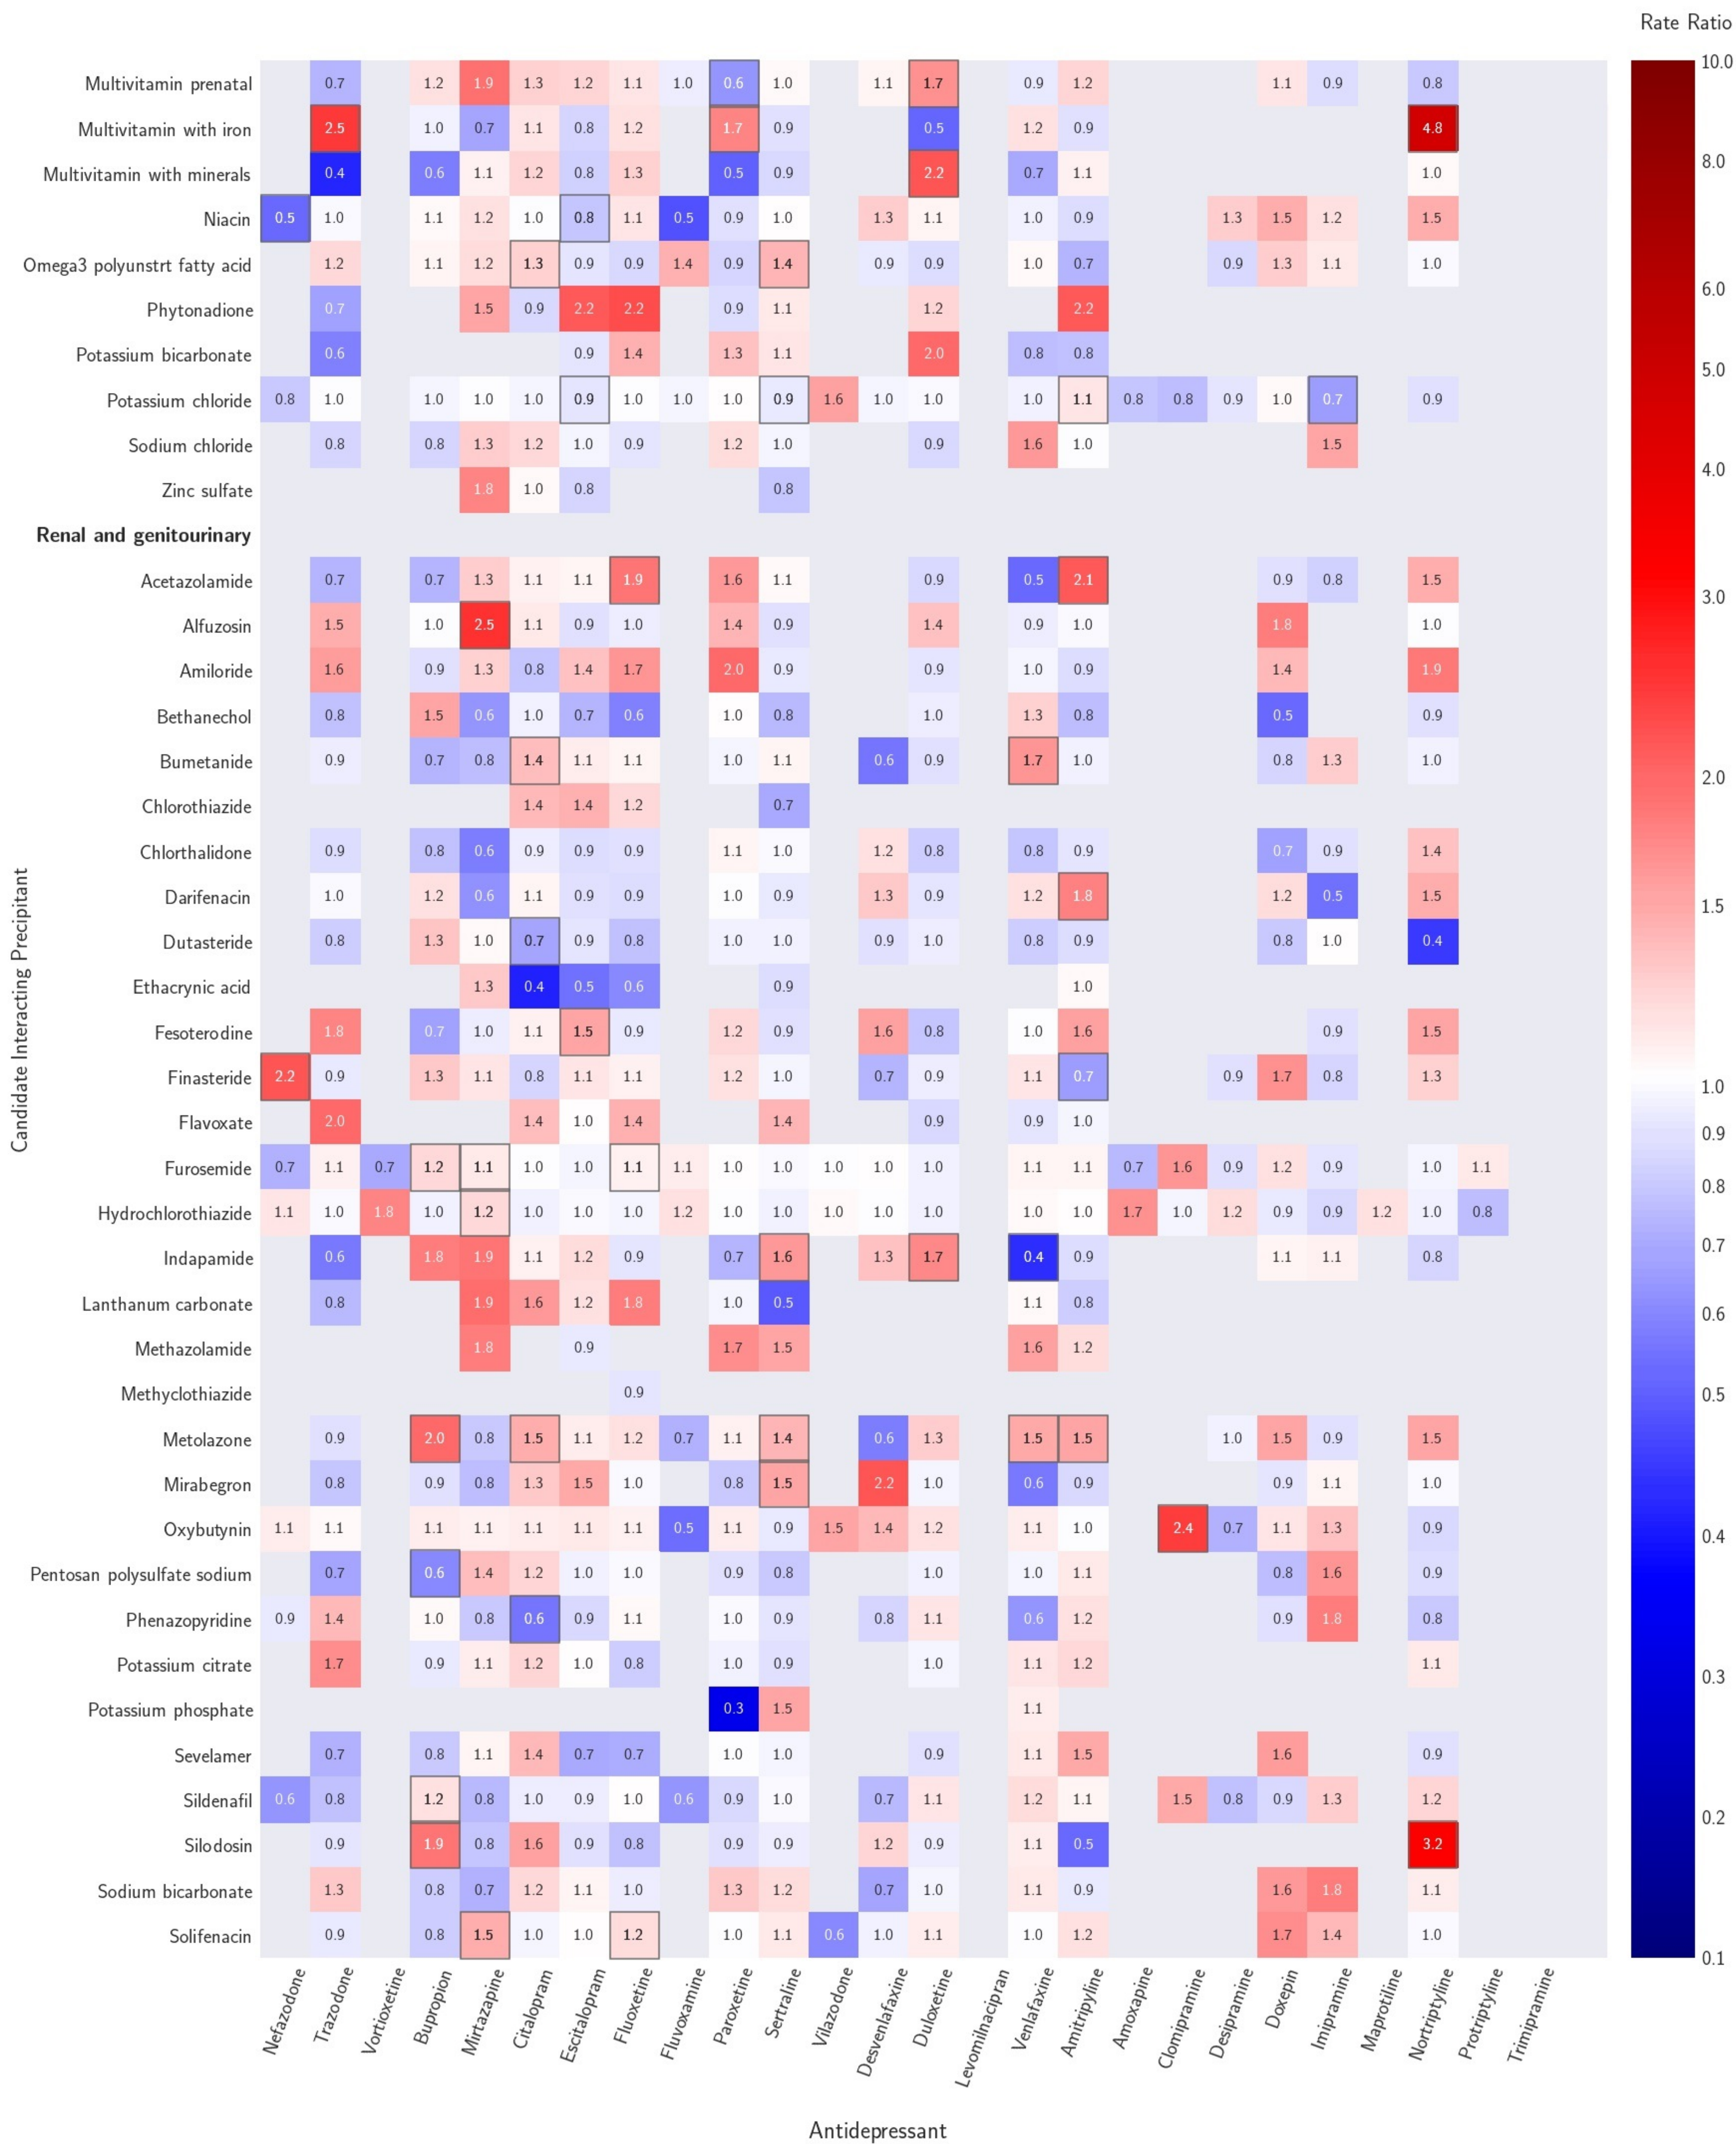

Supplement: NIHMS1674792-supplement-FIG_S2A.pdf [file NIHMS1674792-supplement-FIG_S2A.pdf]

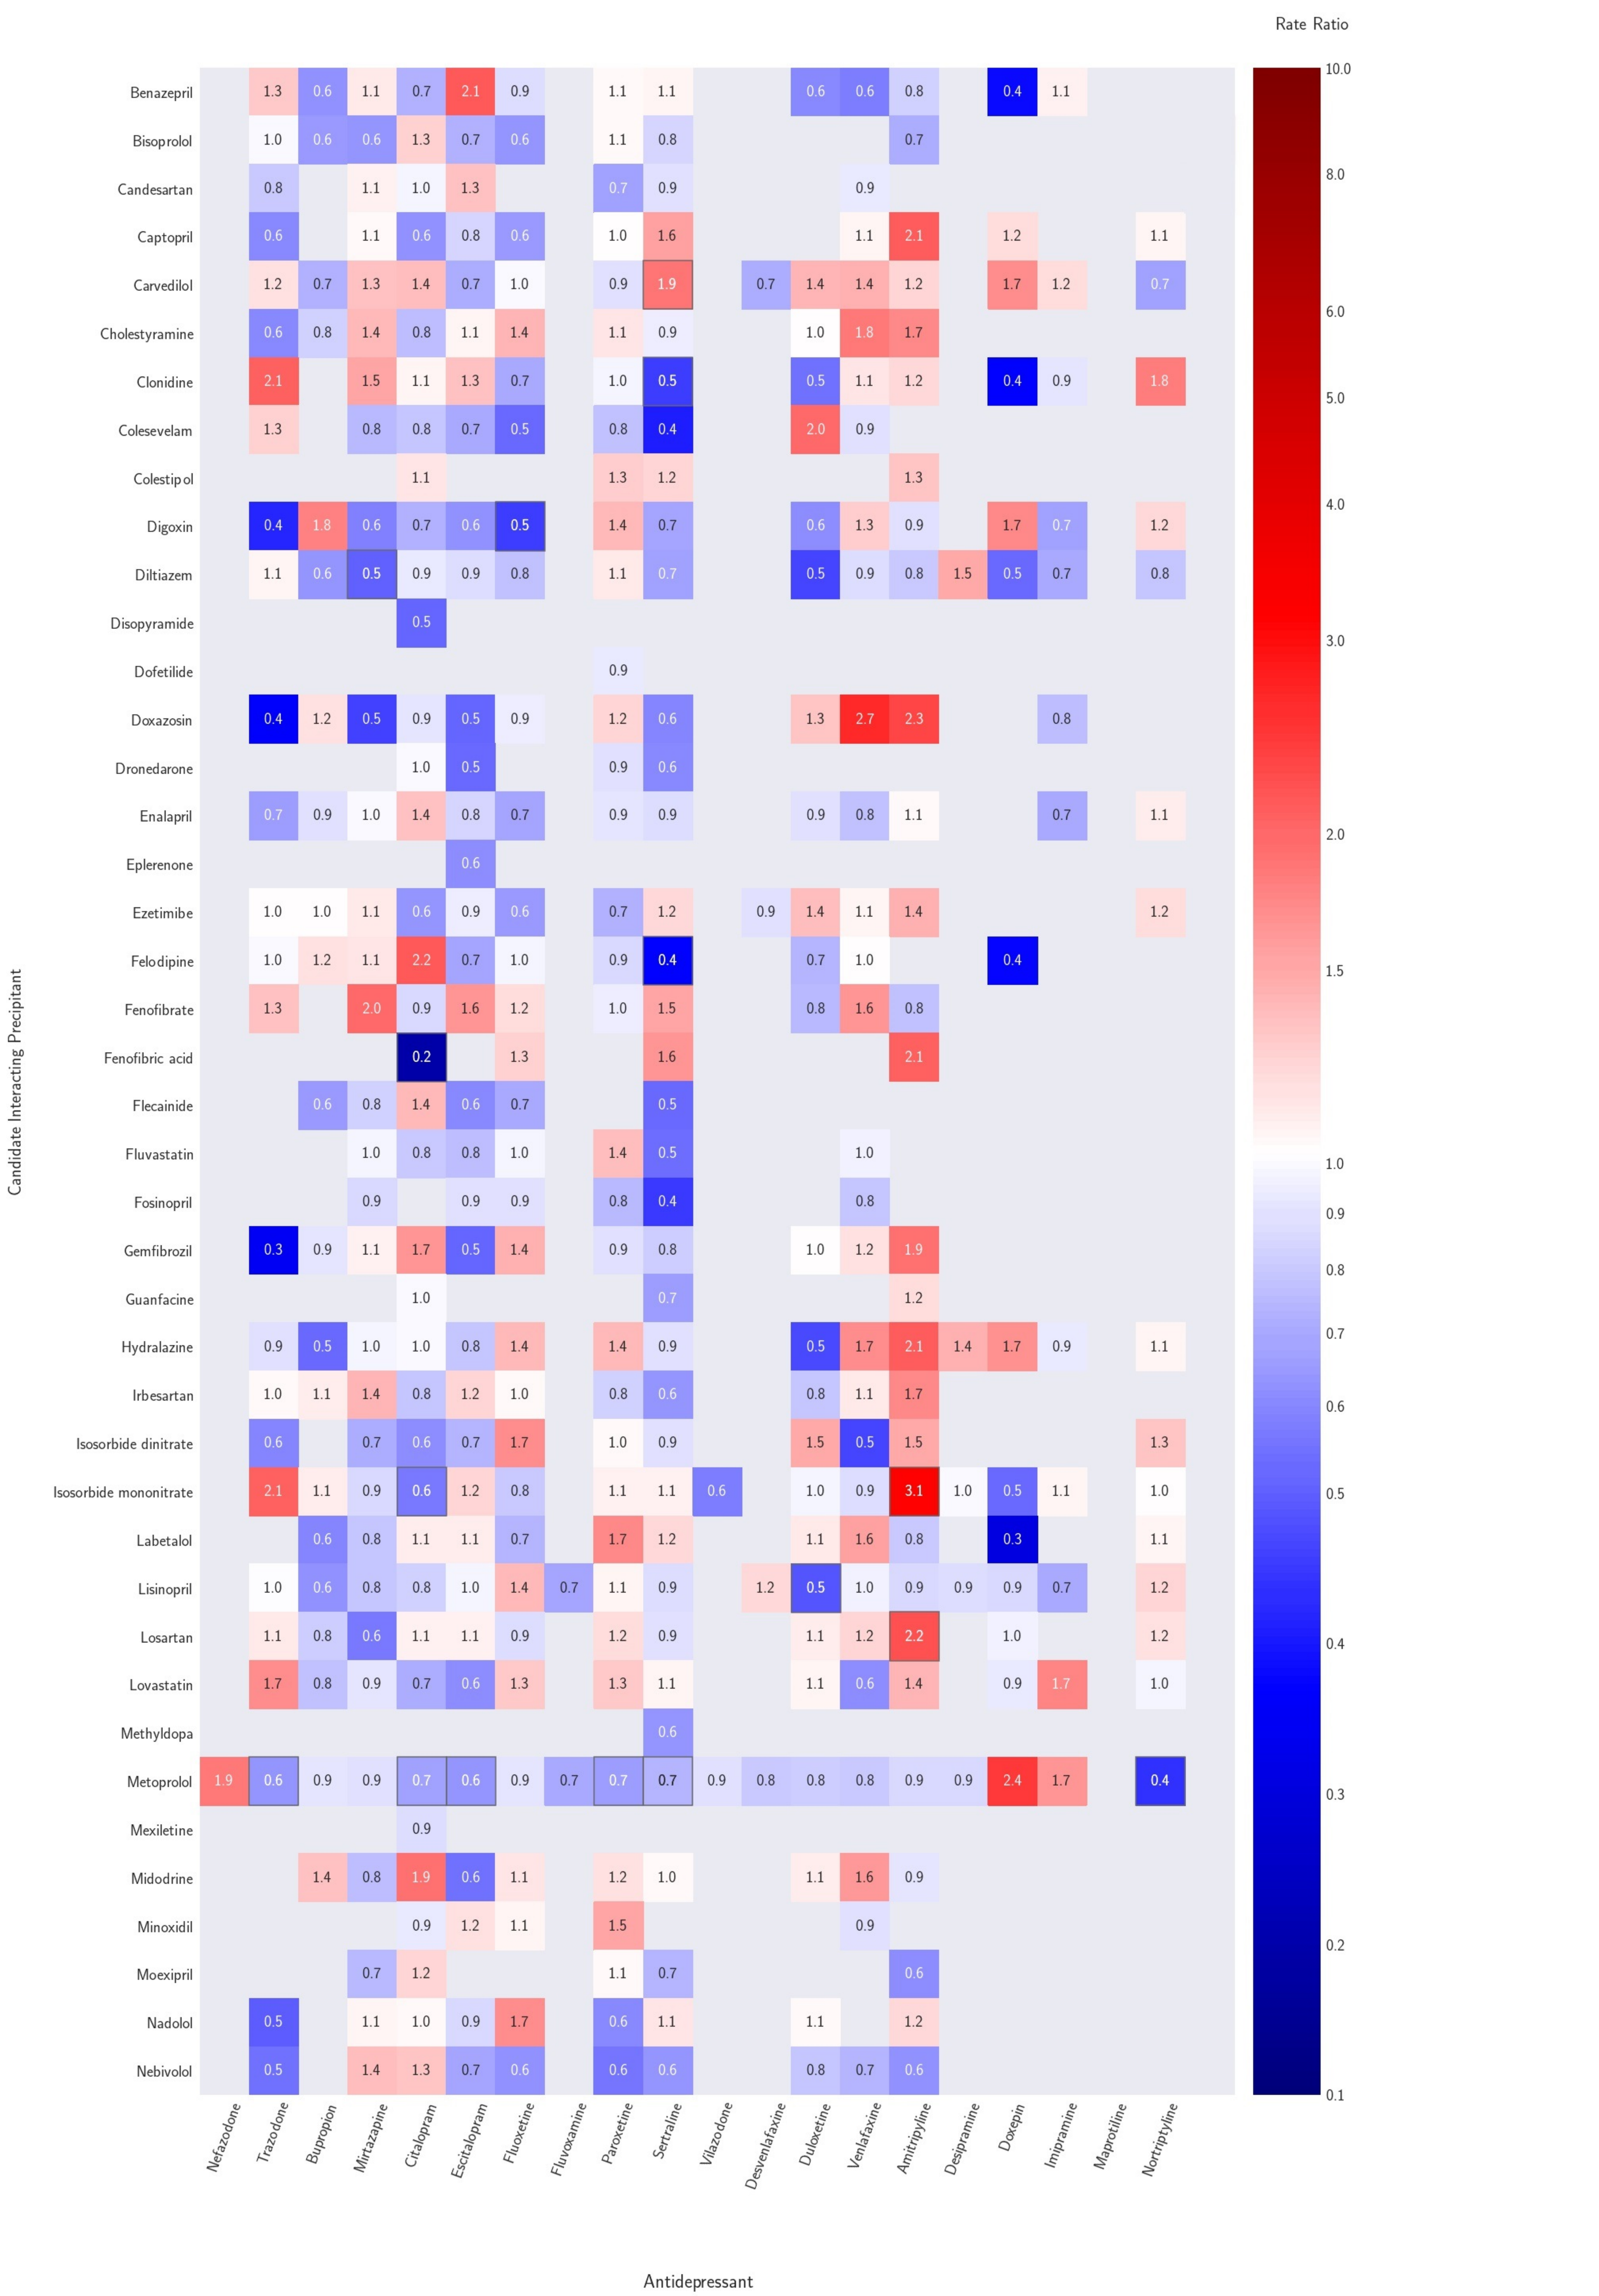







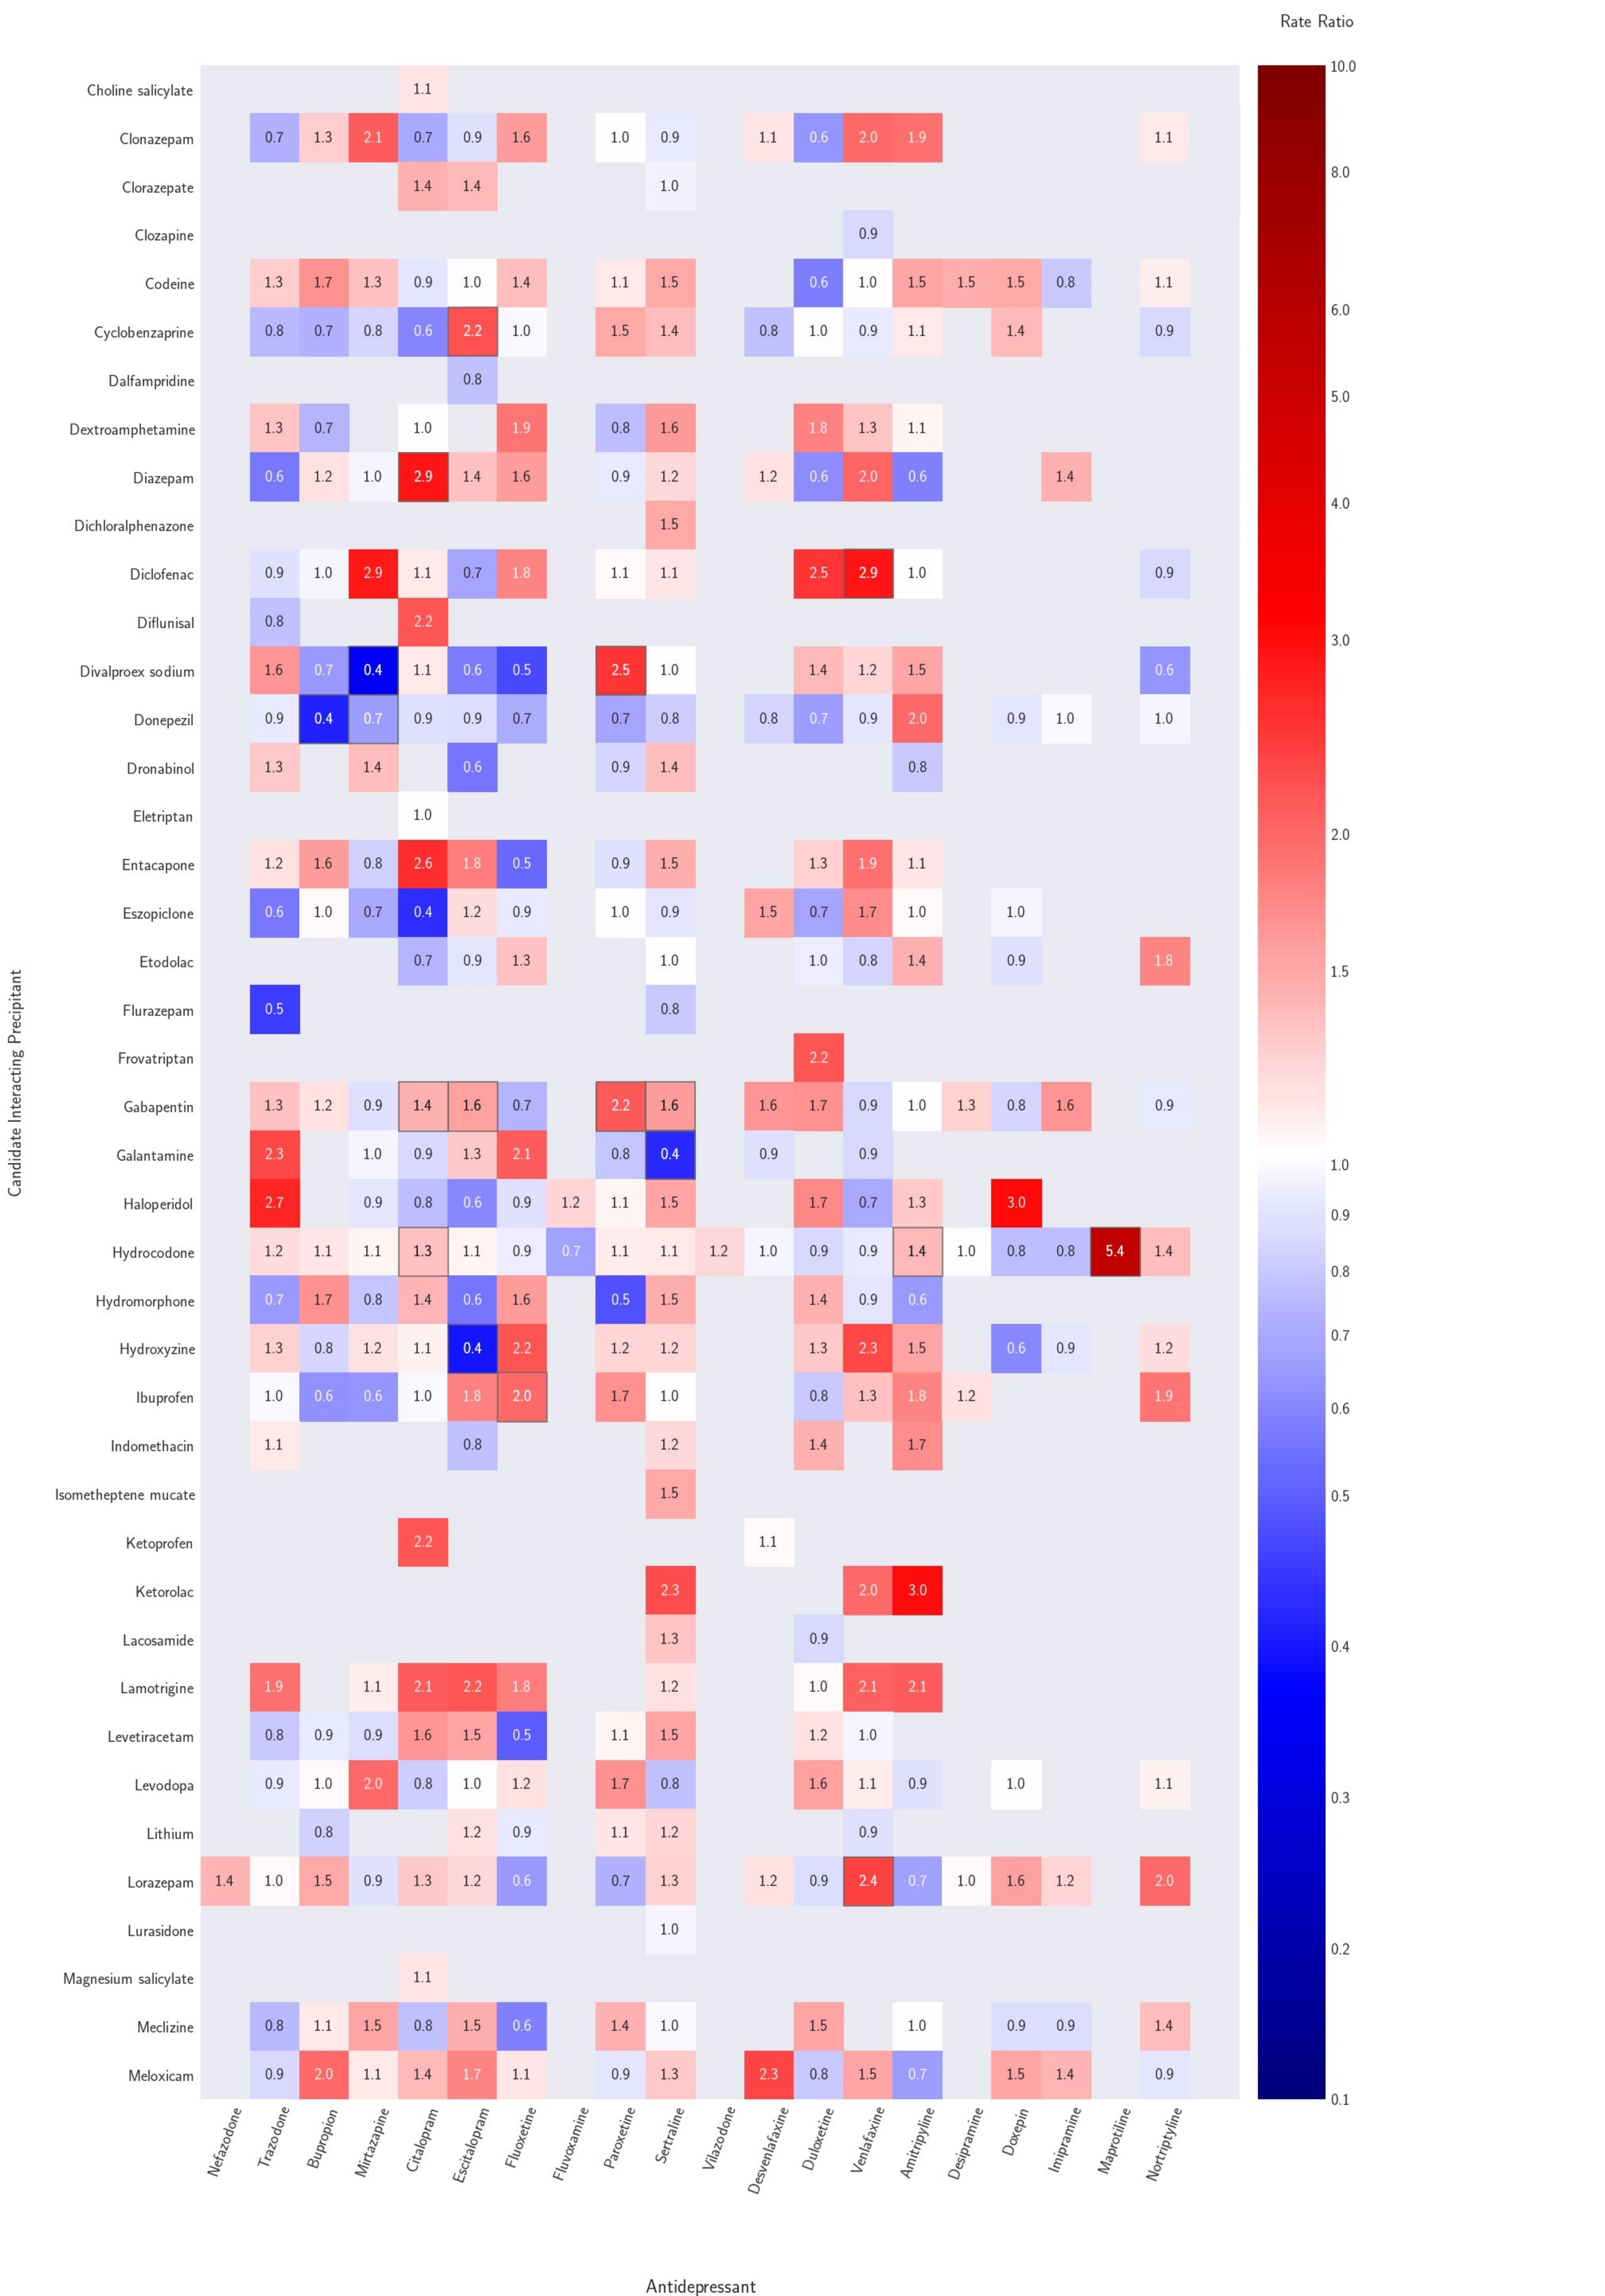







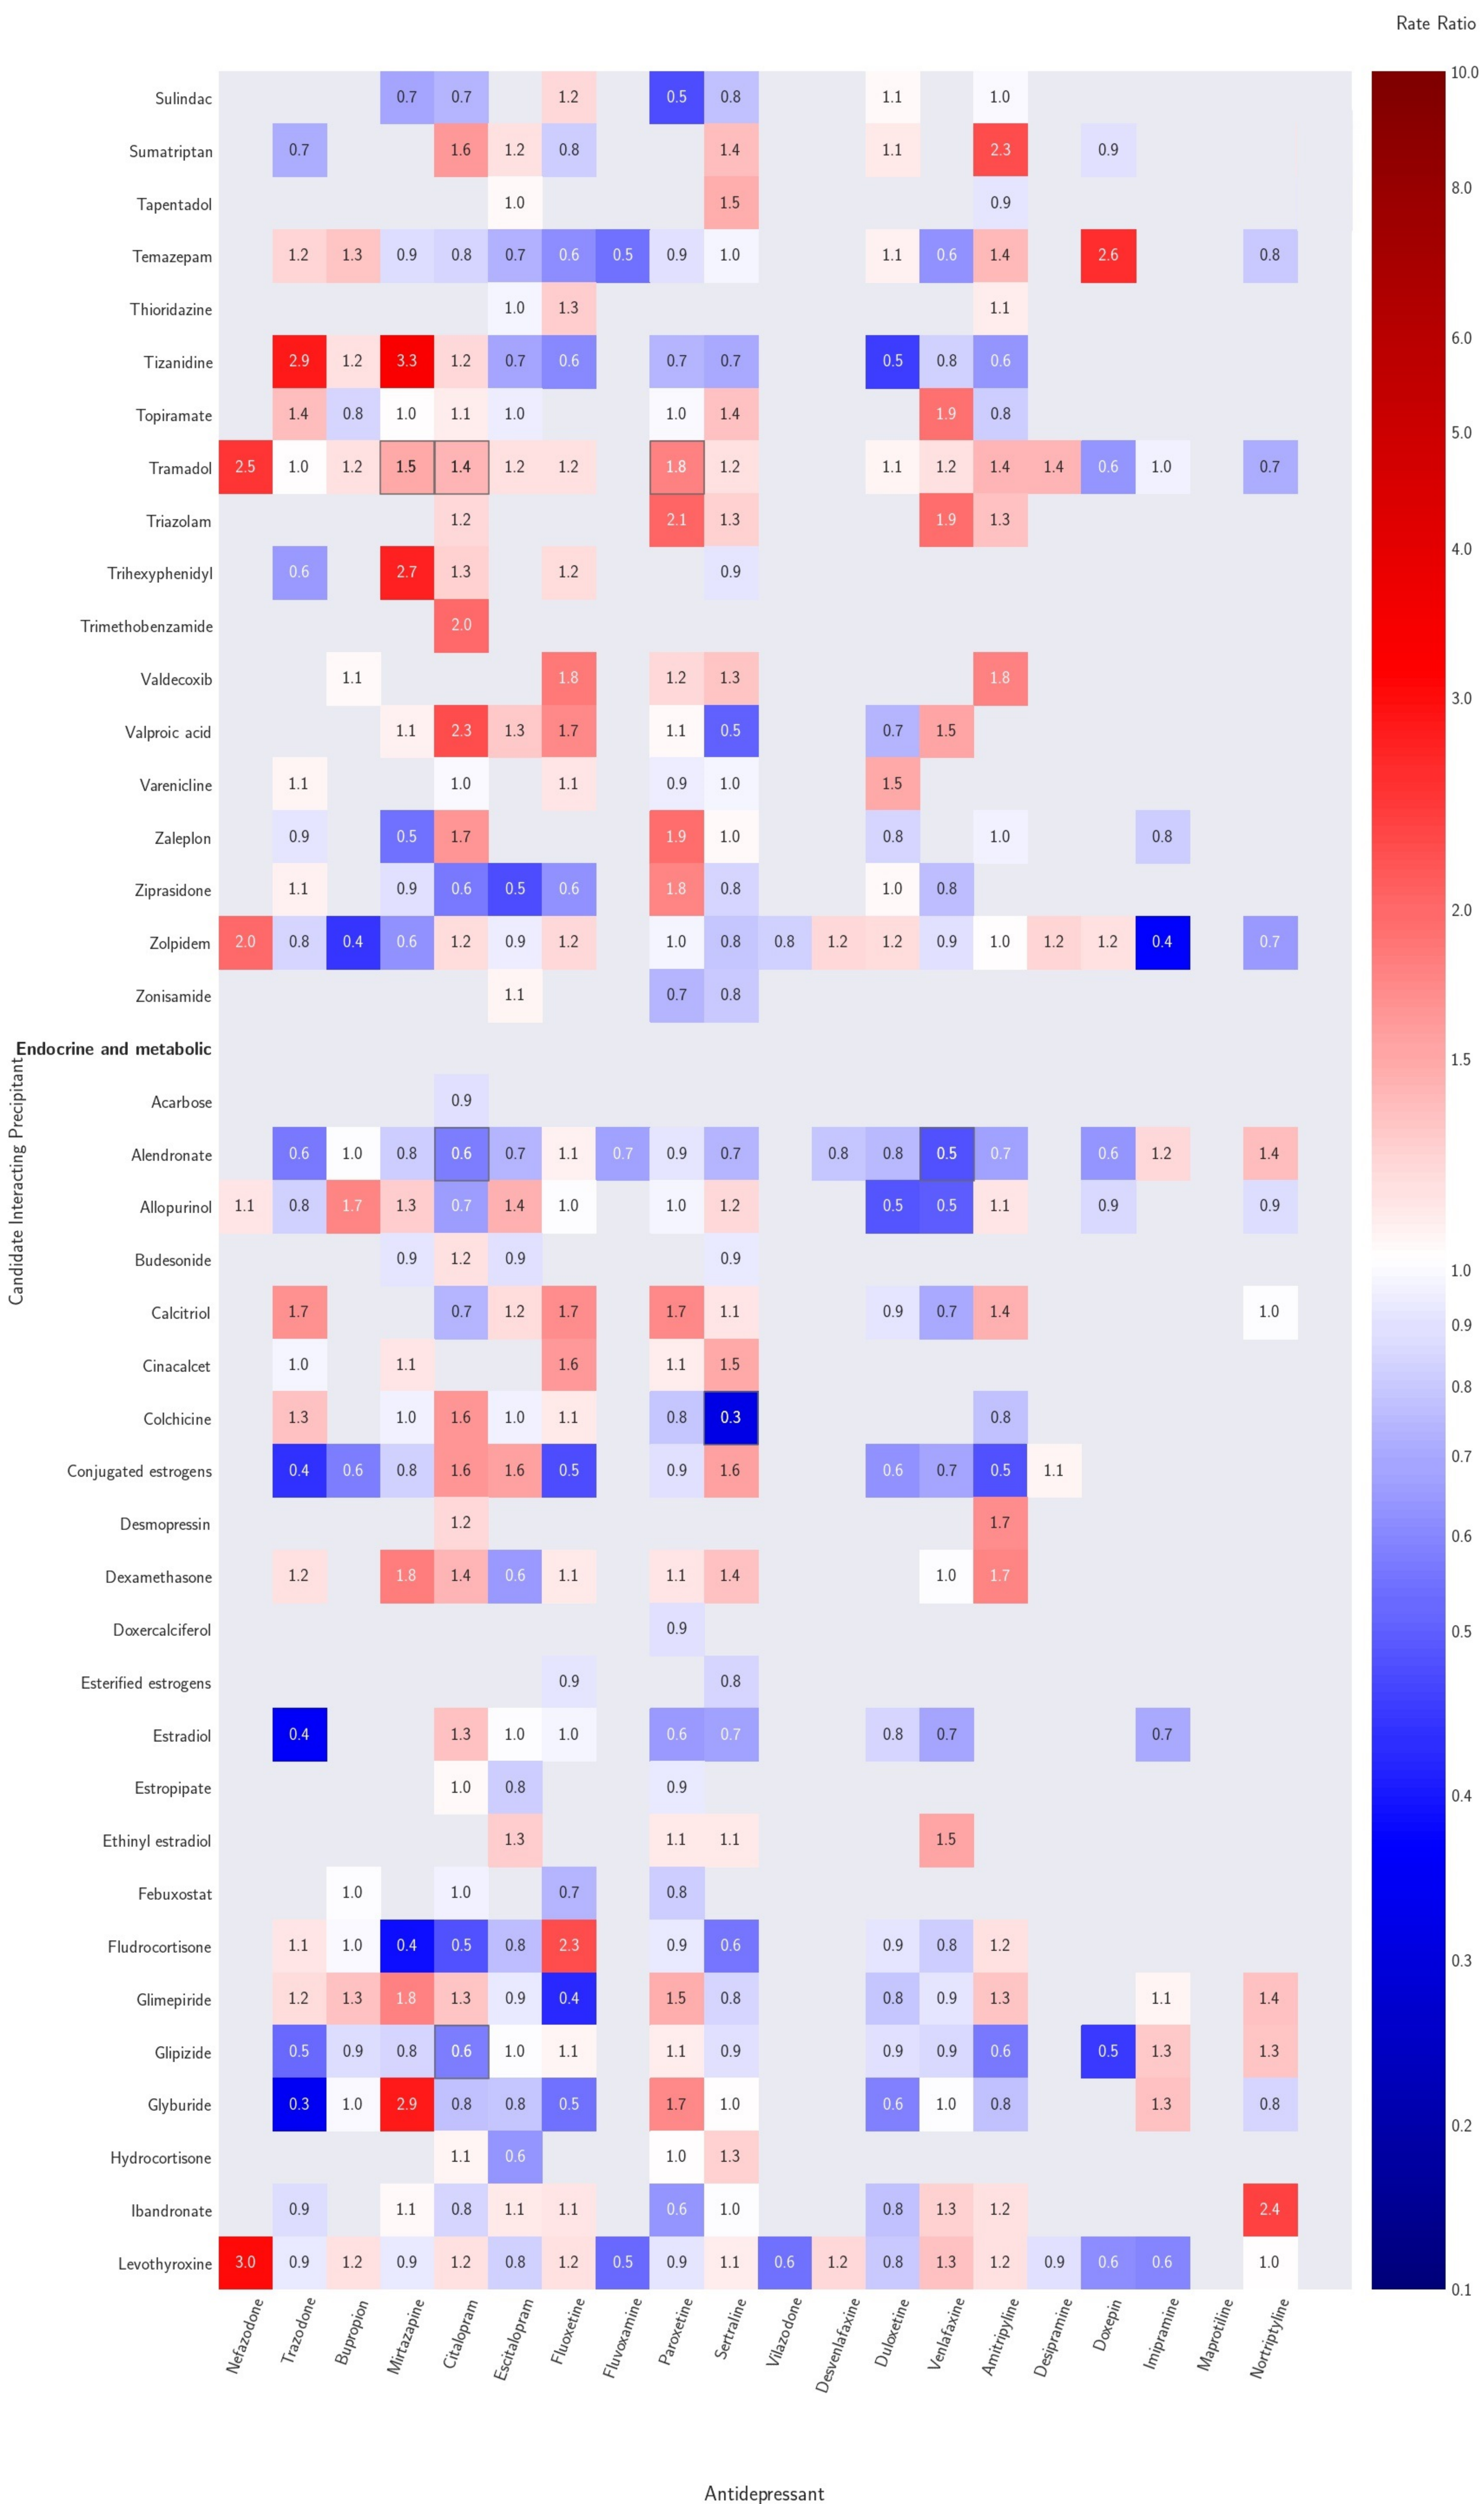



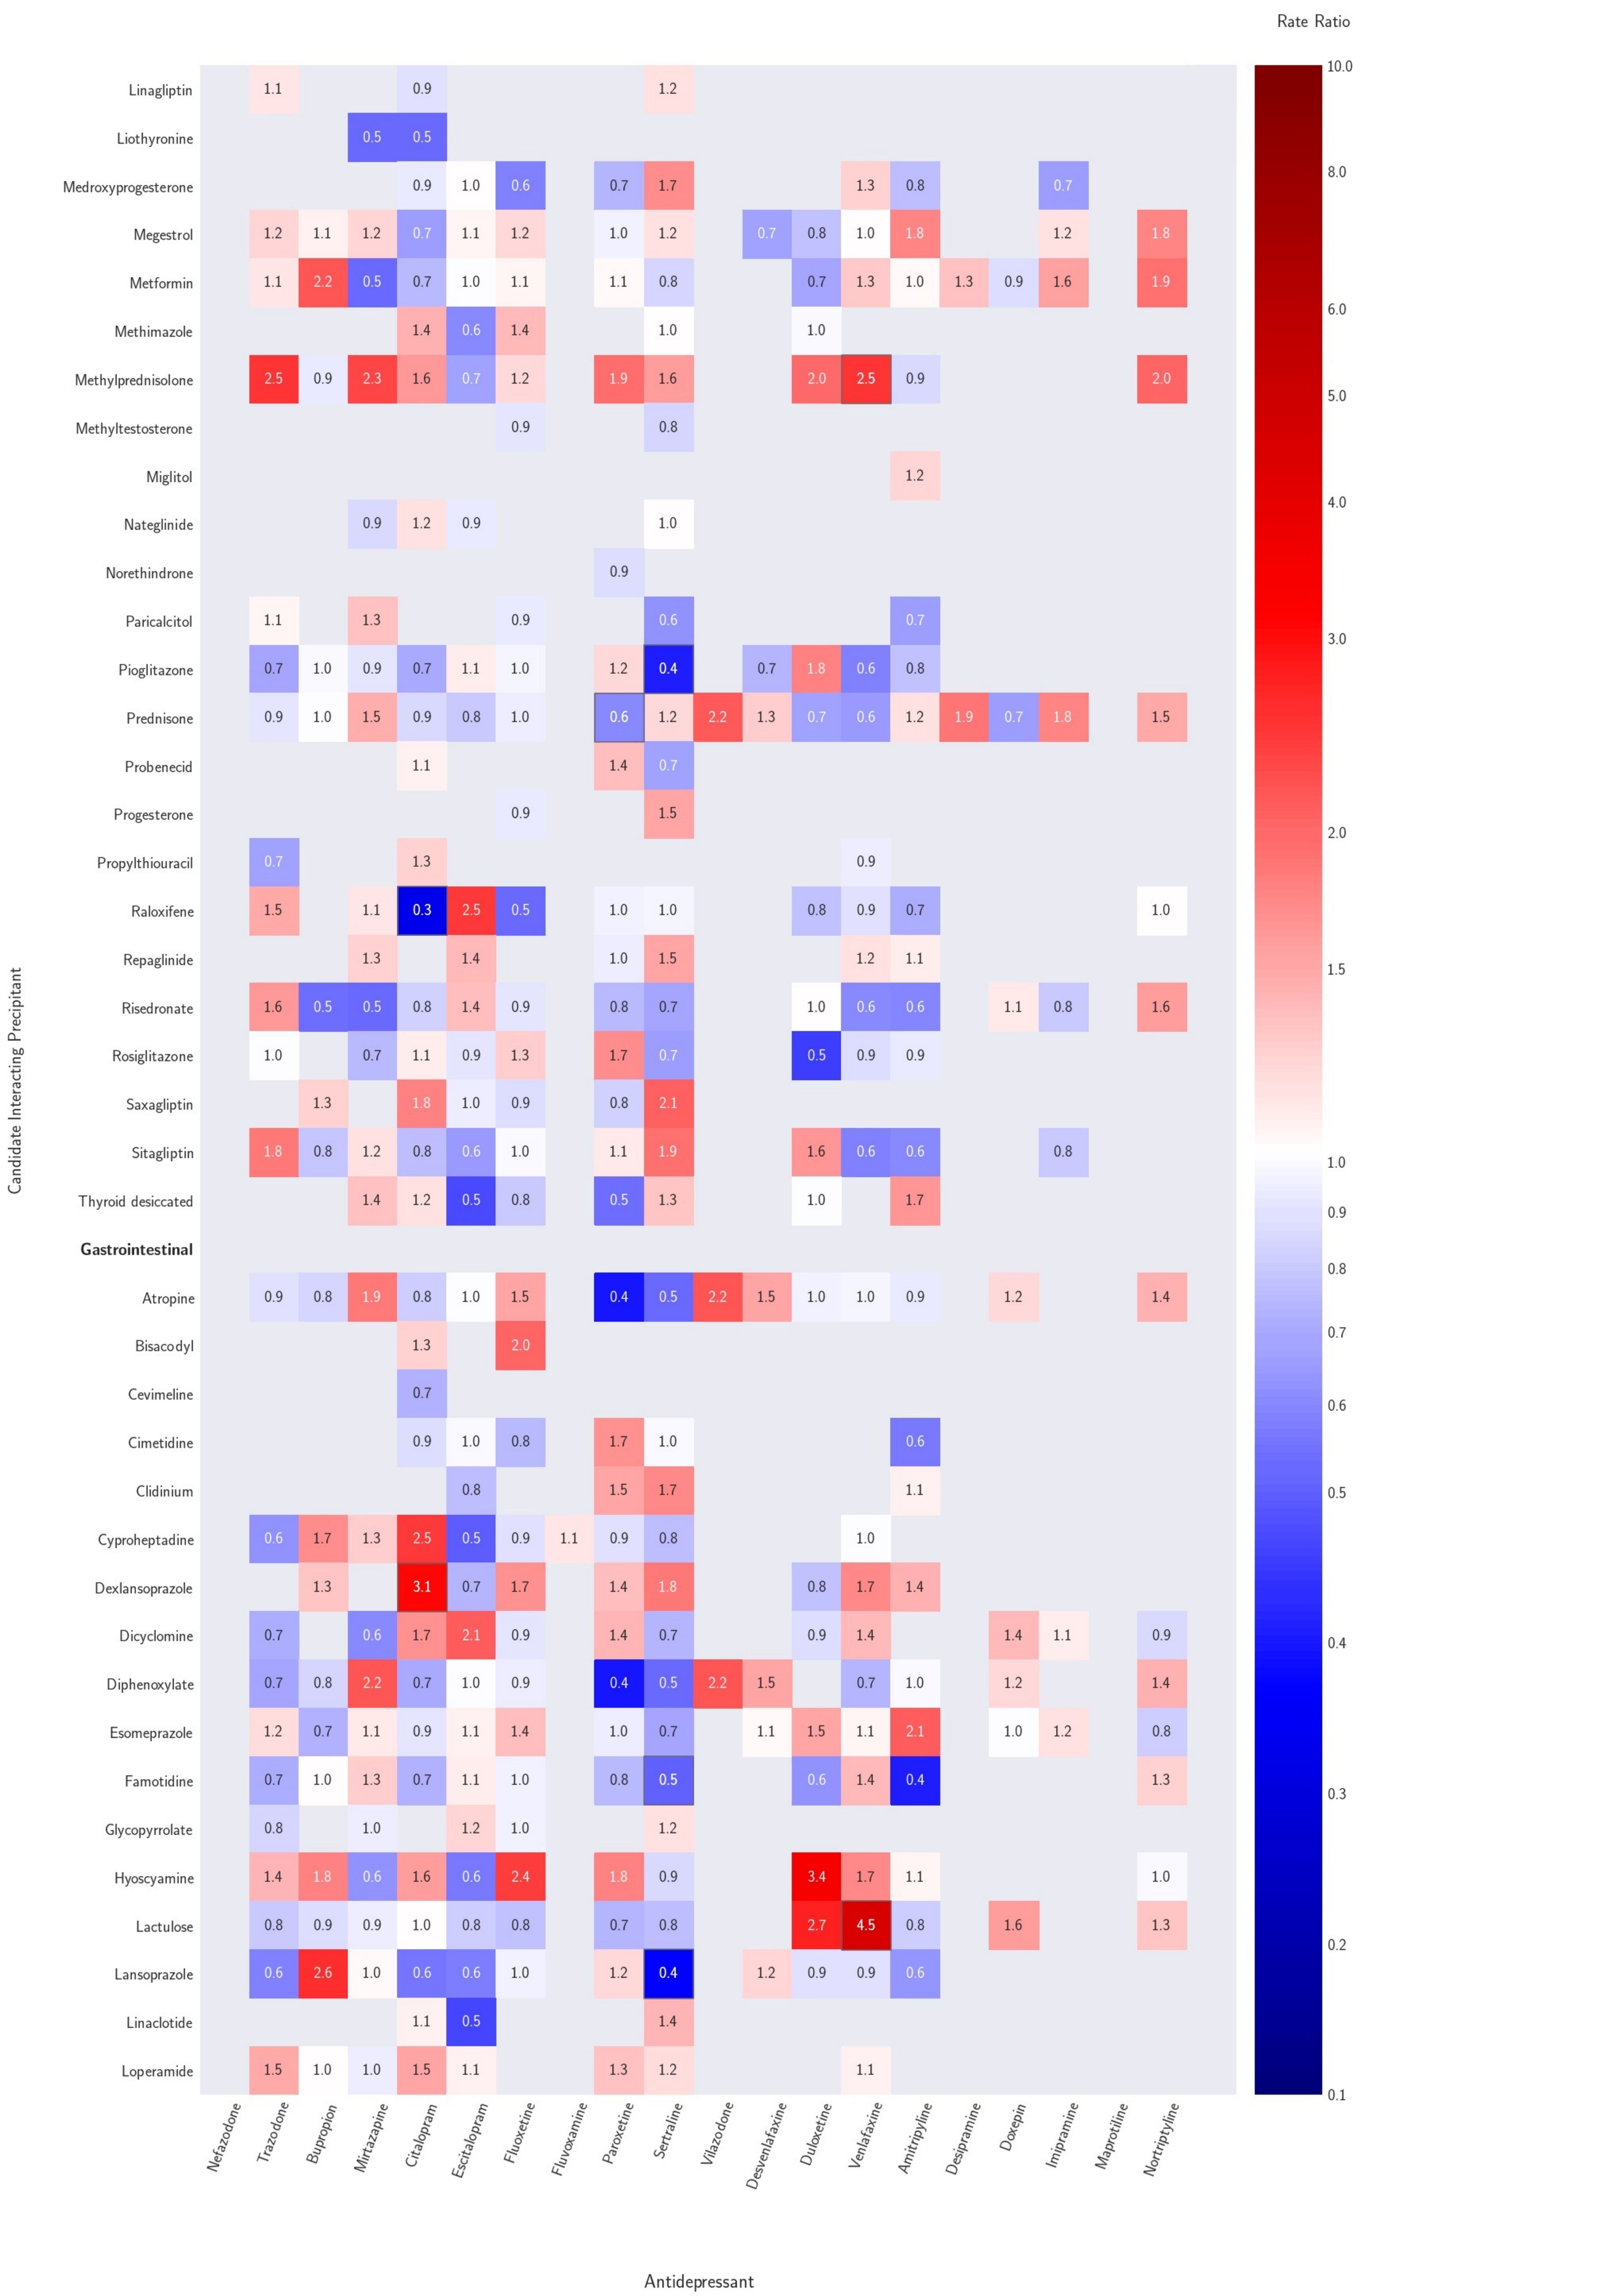



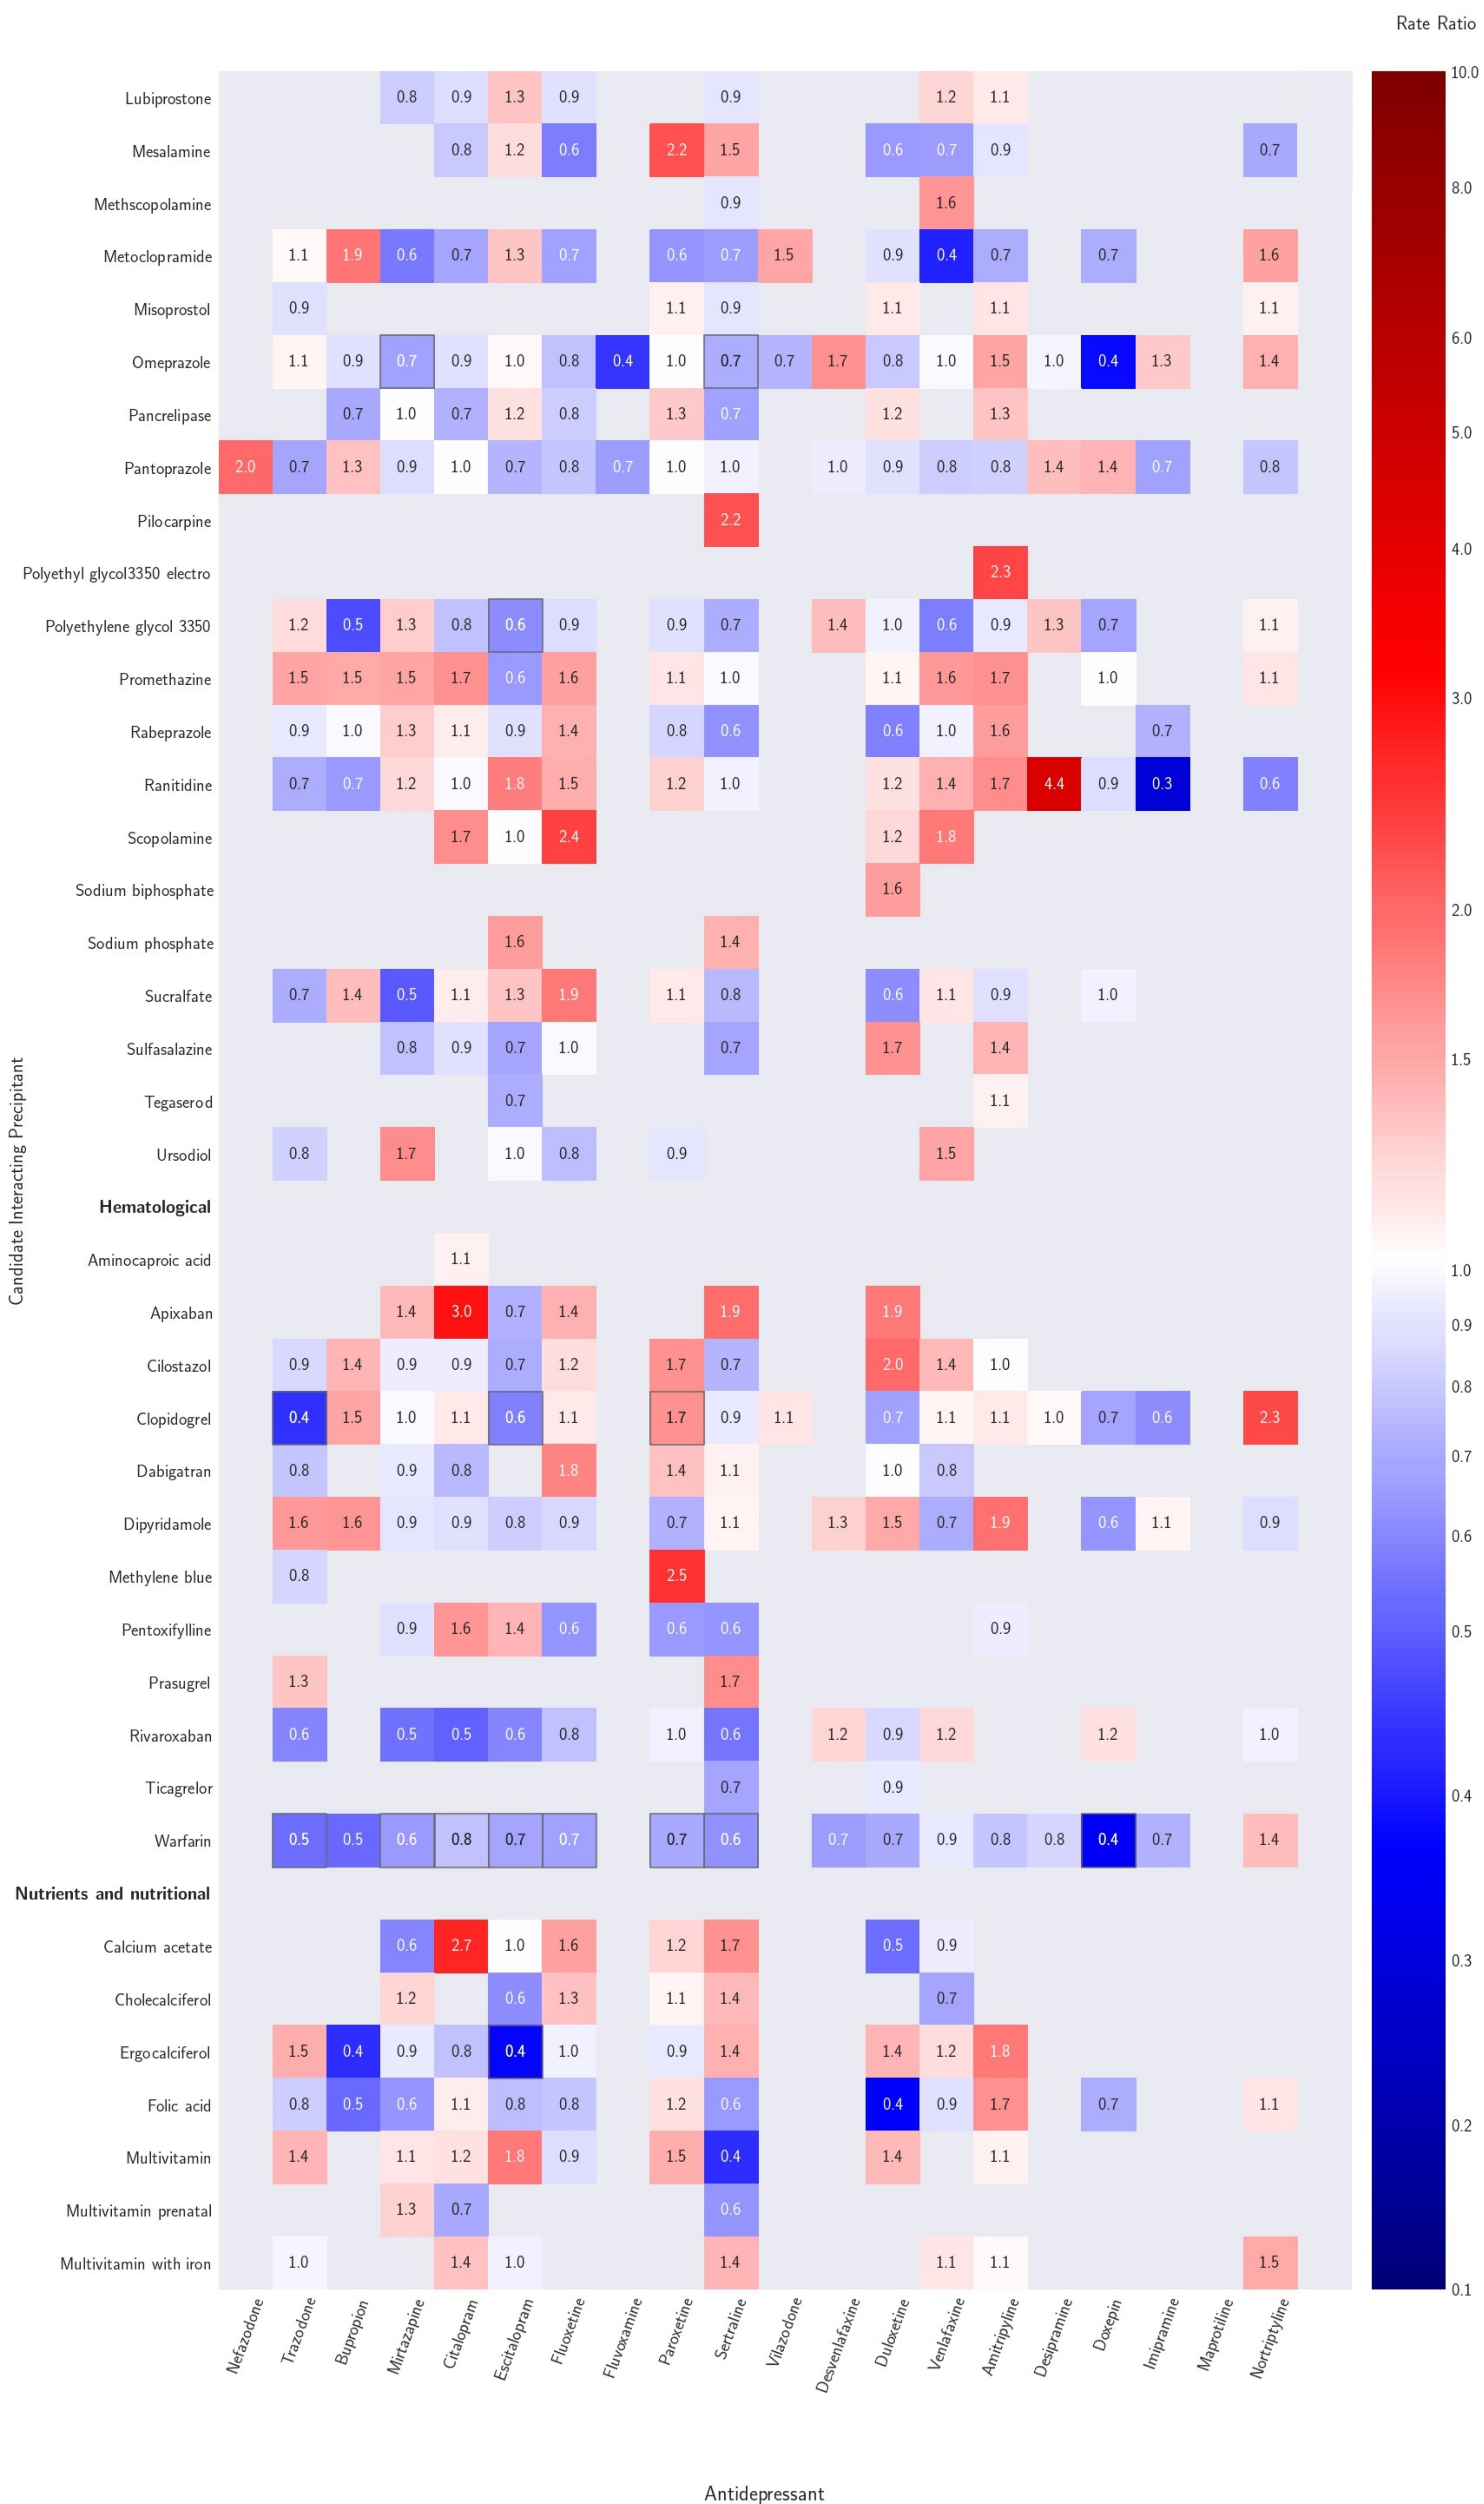



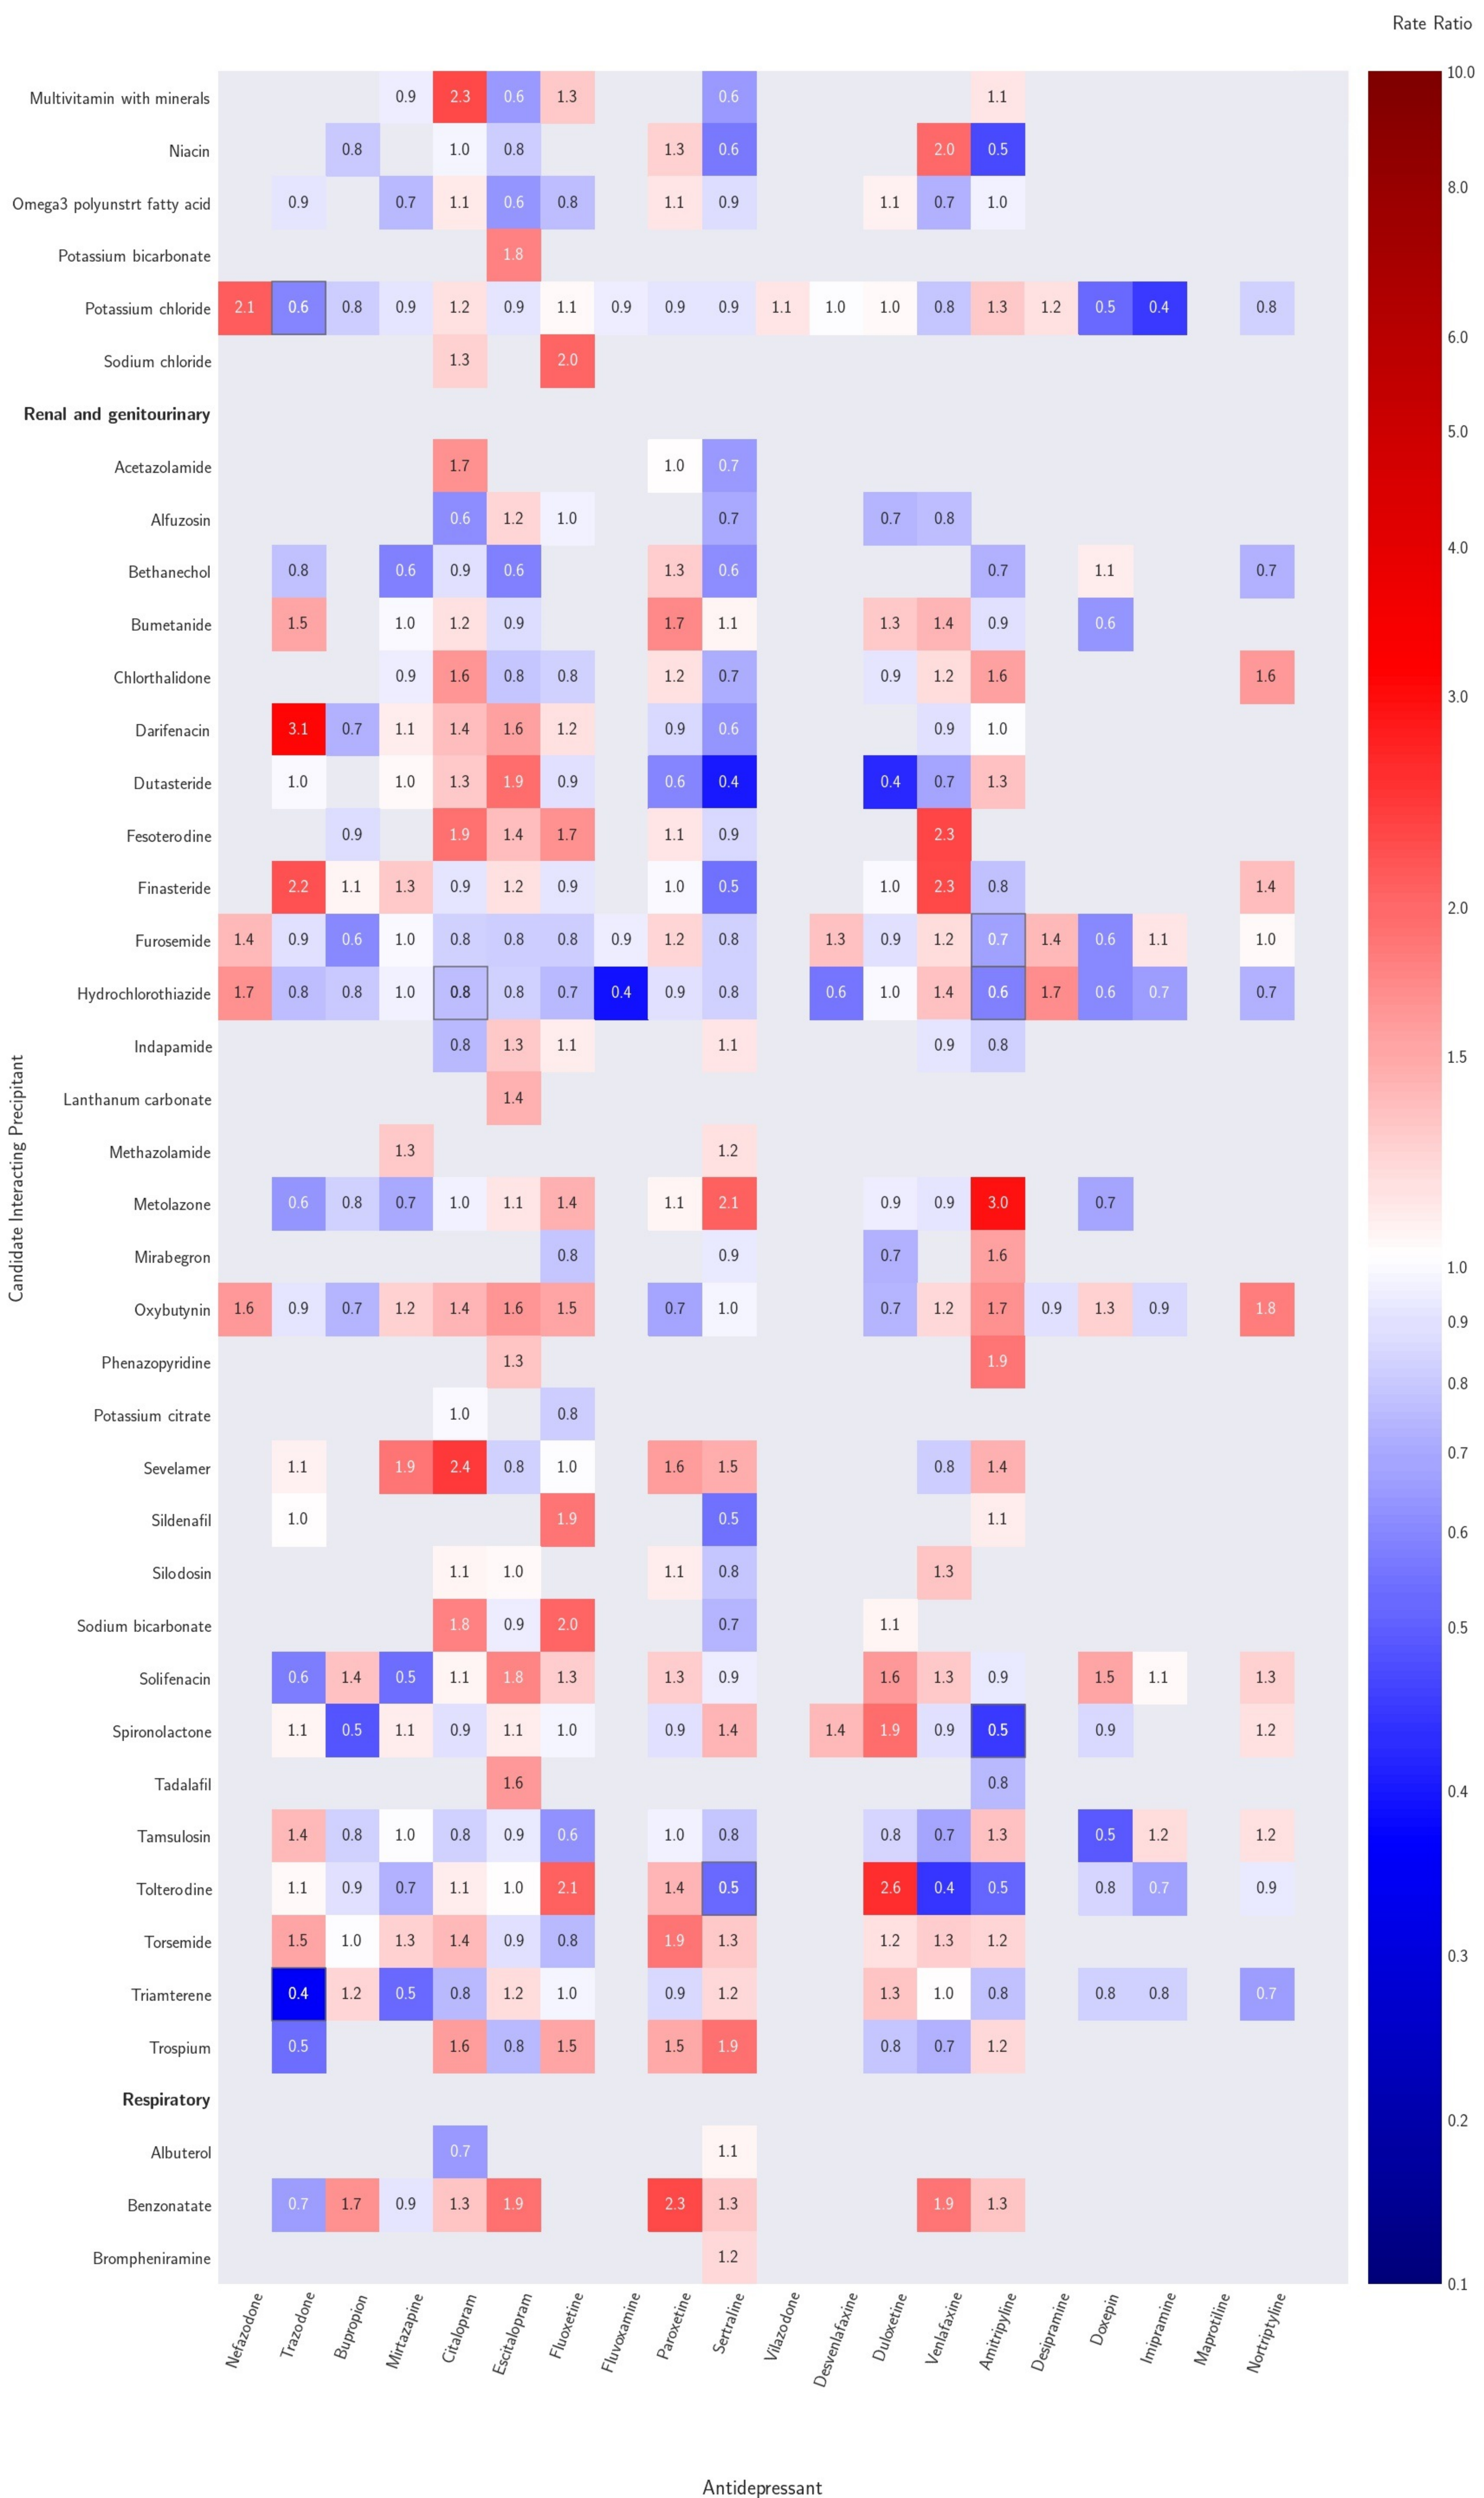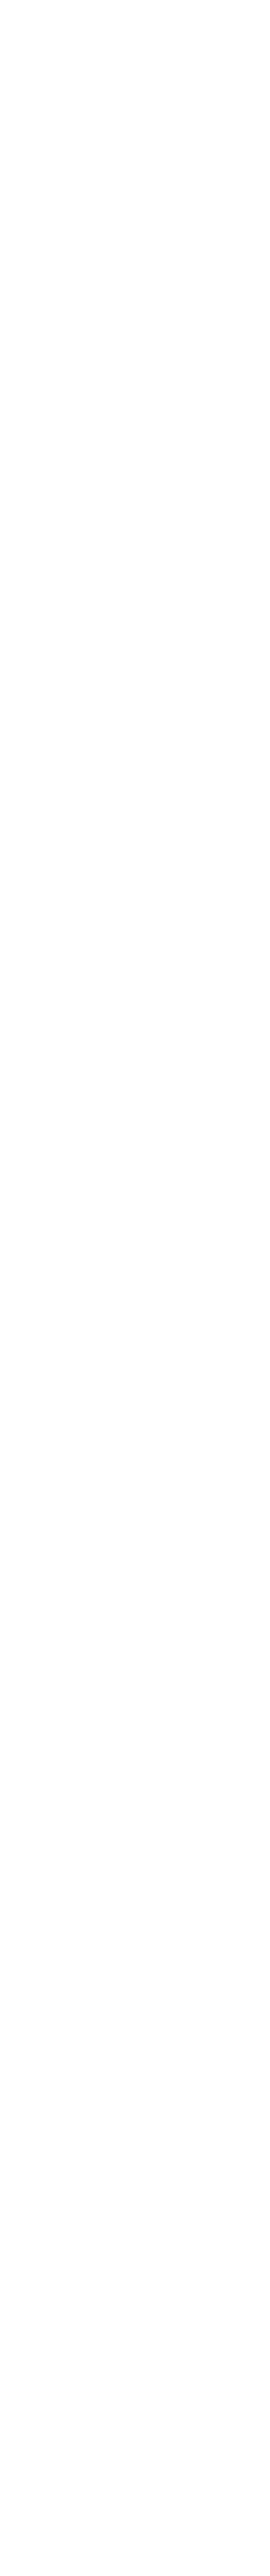



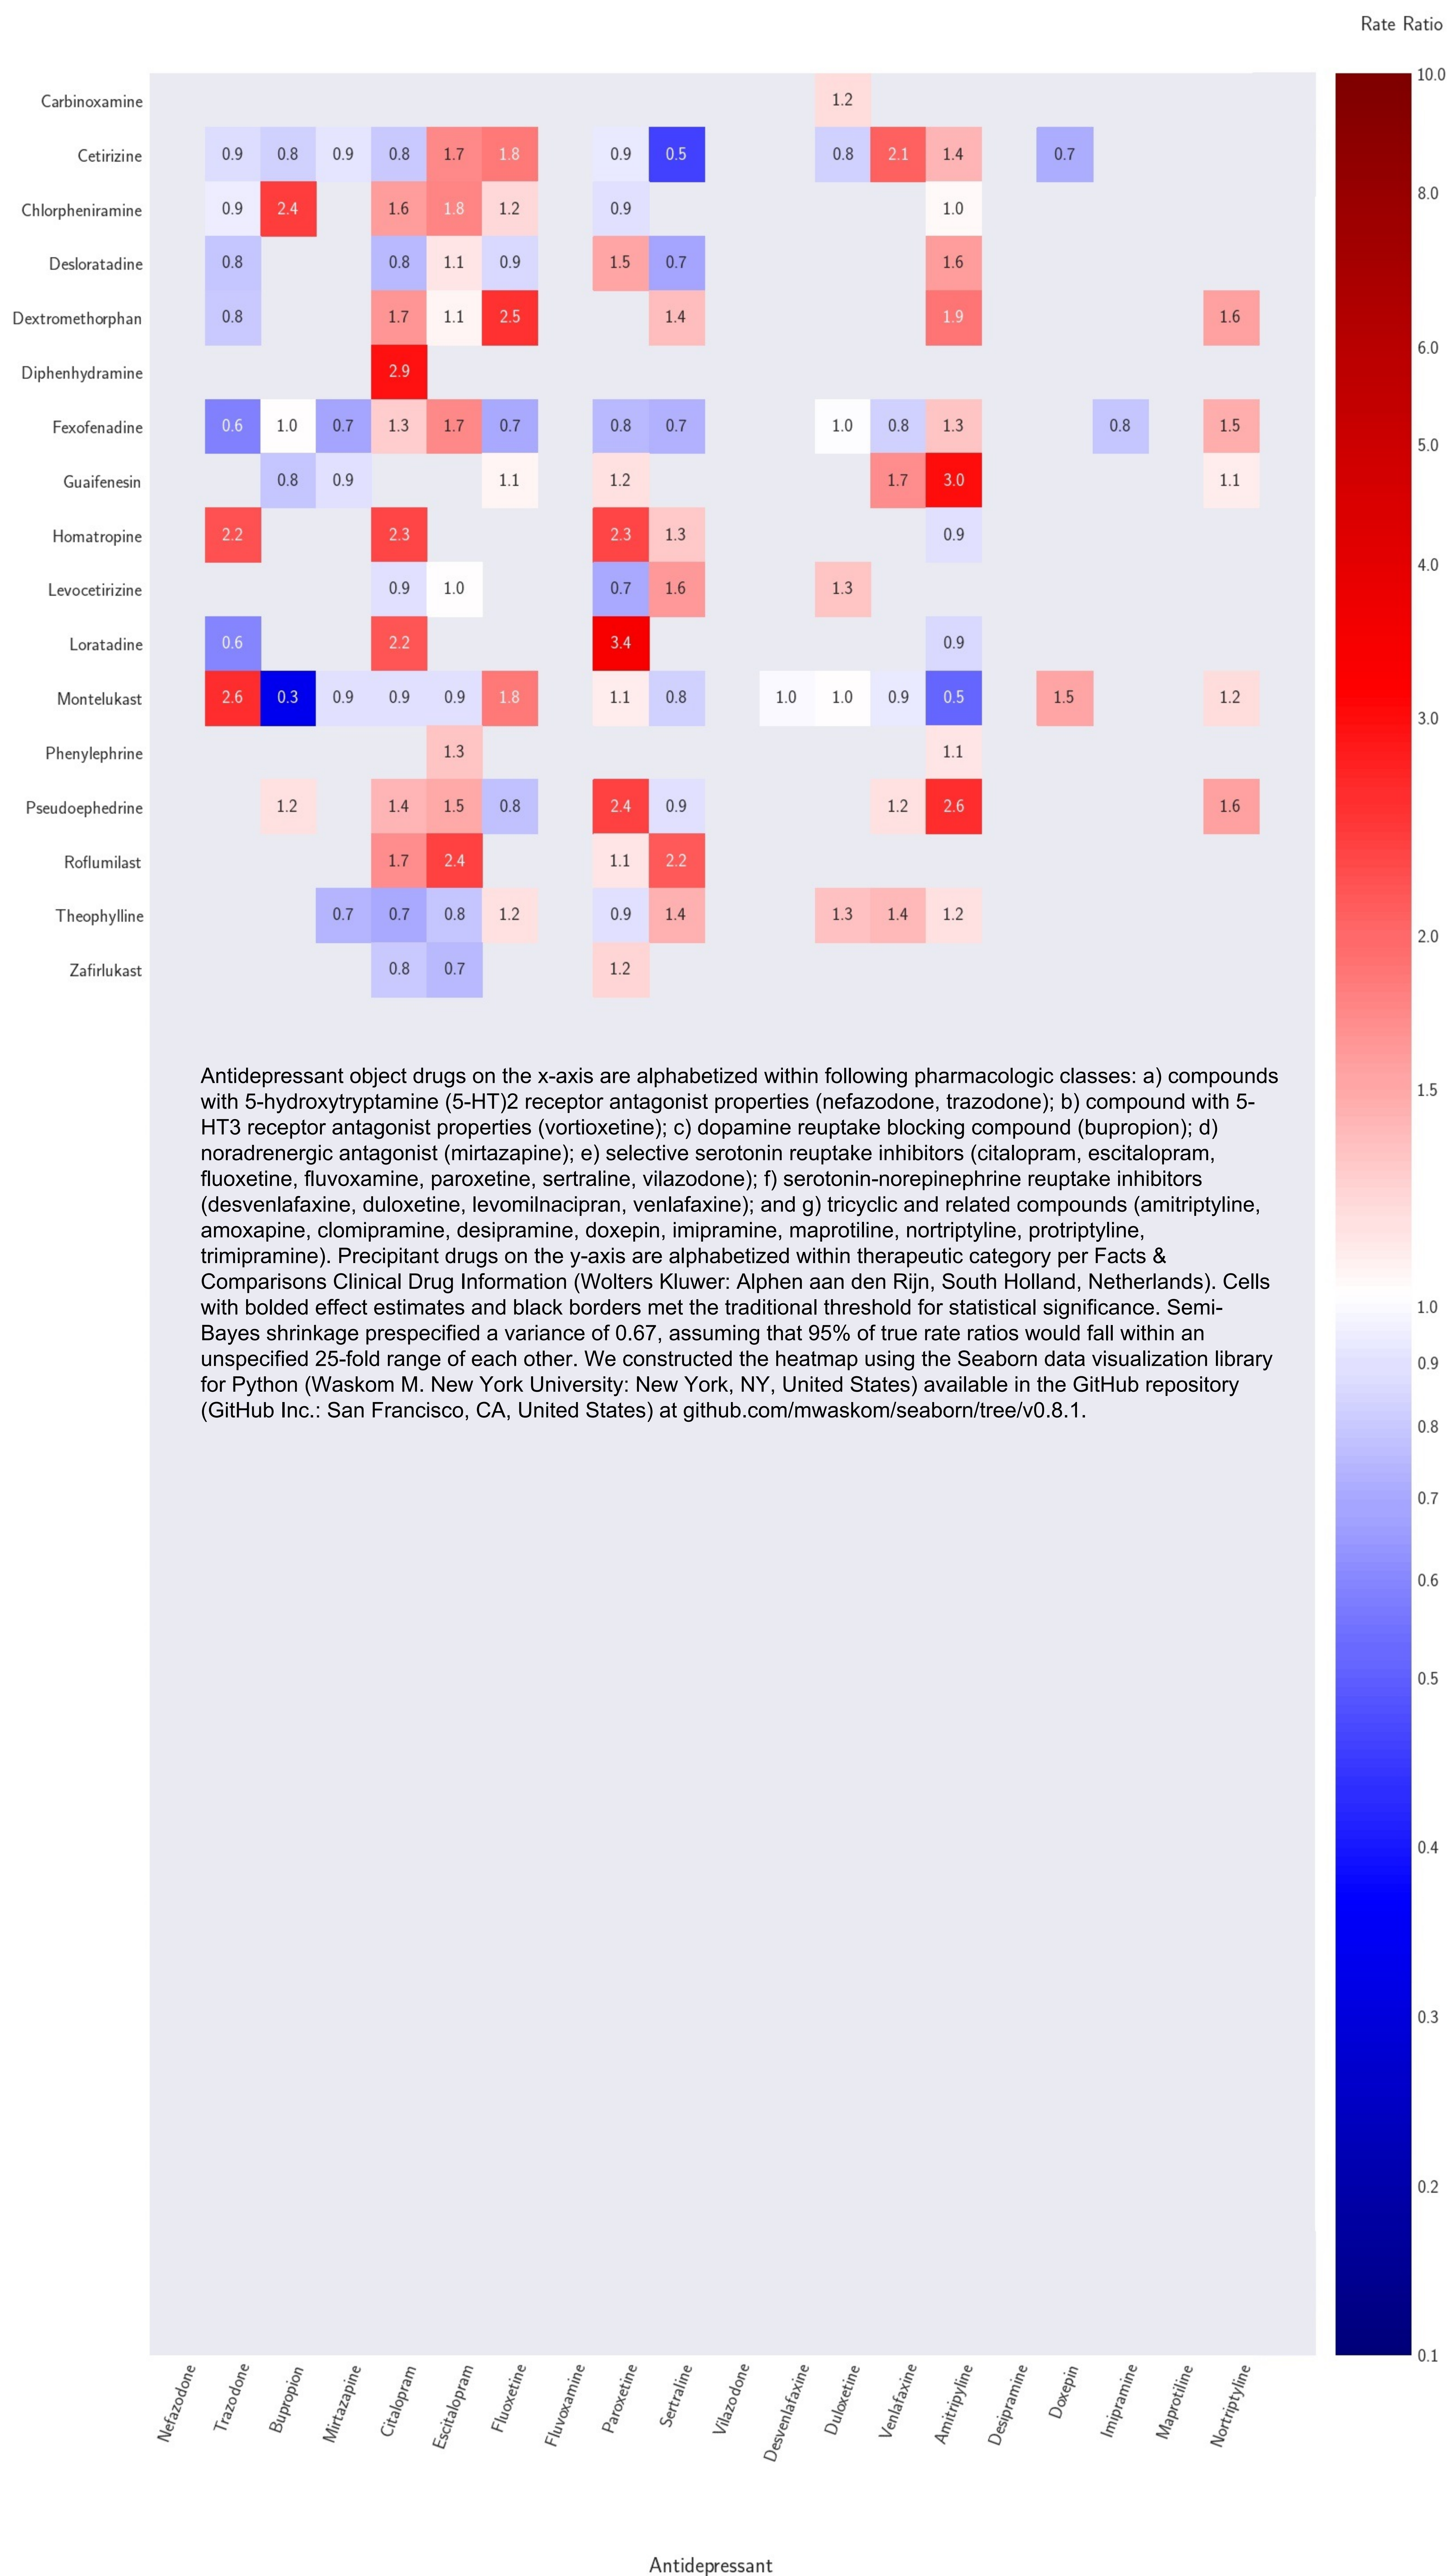

Supplement: NIHMS1674792-supplement-FIG_S2B.pdf [file NIHMS1674792-supplement-FIG_S2B.pdf]
